# Supplementary material for: Alkene insertion enables ring-opening of vinyl epoxides: a theoretical perspective
Source: Royal Society of Chemistry journal article supplement (doi:10.1039/d4qo00950a), 2024-01-01
Supplement: d4qo00950a1.pdf [file d4qo00950a1.pdf]

## Supporting Information

# Alkene Insertion Enables Ring-Opening of Vinyl Epoxides: A Theoretical Perspective

Jiabin Liu,<sup>a</sup> Kai Yang,<sup>a</sup> Jiying Liu,<sup>a</sup> Dongmin Fu,<sup>a</sup> Shi-Jun Li,<sup>\*,a,c</sup> Wenjing Zhang,<sup>\*,a</sup>  
and Yu Lan<sup>\*,a,b,c</sup>

<sup>a</sup> Green Catalysis Center, and College of Chemistry, Zhengzhou University, Zhengzhou, Henan 450001, China.

<sup>b</sup> School of Chemistry and Chemical Engineering, and Chongqing Key Laboratory of Theoretical and Computational Chemistry, Chongqing University, Chongqing 400030, China.

<sup>c</sup> State Key Laboratory of Antiviral Drugs, Pingyuan Laboratory, Xinxiang, Henan, 453007, China

E-mail: [lishijunzong@zzu.edu.cn](mailto:lishijunzong@zzu.edu.cn); [zhangwj@zzu.edu.cn](mailto:zhangwj@zzu.edu.cn); [lanyu@cqu.edu.cn](mailto:lanyu@cqu.edu.cn)

## Contents

|                                                                                                                                           |     |
|-------------------------------------------------------------------------------------------------------------------------------------------|-----|
| Part 1: Complete References for Gaussian 09 and Q-Chem.....                                                                               | S2  |
| Part 2: The <i>s-cis</i> and <i>s-trans</i> conformations of vinyl epoxides and stereoselectivity of the 5,4-insertion .....              | S4  |
| Part 3: The ring-opening pathway via 4,5-insertion followed by $\beta$ -oxygen elimination.....                                           | S5  |
| Part 4: Two different conformations that boryl and epoxide are in the <i>syn</i> and <i>anti</i> orientations in the cyclic complex. .... | S6  |
| Part 5: EDA study on the interaction energies.....                                                                                        | S7  |
| Part 6: Cu-catalyzed reductive ring-opening of vinyl epoxides bearing the an alkyl group on the double bond .....                         | S8  |
| Part 7: The copper atomic charges.....                                                                                                    | S9  |
| Part 8: Energetic Information of Optimized Structures.....                                                                                | S10 |
| Part 9: Cartesian coordinates of the stationary points .....                                                                              | S12 |

## Part 1: Complete References for Gaussian 09 and Q-Chem

1. M. J. Frisch, G. W. Trucks, H. B. Schlegel, G. E. Scuseria, M. A. Robb, J. R. Cheeseman, G. B. Scalmani, V., B. Mennucci, G. A. Petersson, H. Nakatsuji, M. Caricato, X. Li, H. P. Hratchian, A. F. Izmaylov, J. Bloino, G. Zheng, J. L. Sonnenberg, M. Hada, M. Ehara, K. Toyota, R. Fukuda, J. Hasegawa, M. Ishida, T. Nakajima, Y. Honda, O. Kitao, H. Nakai, T. Vreven, J. A. Montgomery Jr, J. E. Peralta, F. Ogliaro, M. Bearpark, J. J. Heyd, E. Brothers, K. N. Kudin, V. N. Staroverov, R. Kobayashi, J. Normand, K. Raghavachari, A. Rendell, J. C. Burant, S. S. Iyengar, J. Tomasi, M. Cossi, N. Rega, N. J. Millam, M. Klene, J. E. Knox, J. B. Cross, V. Bakken, C. Adamo, J. Jaramillo, R. Gomperts, R. E. Stratmann, O. Yazyev, A. J. Austin, R. Cammi, C. Pomelli, J. W. Ochterski, R. L. M. Martin, K., V. G. Zakrzewski, G. A. Voth, P. Salvador, J. J. Dannenberg, S. Dapprich, A. D. Daniels, O. Farkas, J. B. Foresman, J. V. Ortiz, J. Cioslowski and D. J. Fox, Gaussian 09, Revision D.01, Gaussian, Inc., Wallingford CT, 2013.
2. E. Epifanovsky, A. T. B. Gilbert, X. Feng, J. Lee, Y. Mao, N. Mardirossian, P. Pokhilko, A. F. White, M. P. Coons, A. L. Dempwolff, Z. Gan, D. Hait, P. R. Horn, L. D. Jacobson, I. Kaliman, J. Kussmann, A. W. Lange, K. U. Lao, D. S. Levine, J. Liu, S. C. McKenzie, A. F. Morrison, K. D. Nanda, F. Plasser, D. R. Rehn, M. L. Vidal, Z.-Q. You, Y. Zhu, B. Alam, B. J. Albrecht, A. Aldossary, E. Alguire, J. H. Andersen, V. Athavale, D. Barton, K. Begam, A. Behn, N. Bellonzi, Y. A. Bernard, E. J. Berquist, H. G. A. Burton, A. Carreras, K. Carter-Fenk, R. Chakraborty, A. D. Chien, K. D. Closser, V. Cofer-Shabica, S. Dasgupta, M. de Wergifosse, J. Deng, M. Diedenhofen, H. Do, S. Ehlert, P.-T. Fang, S. Fatehi, Q. Feng, T. Friedhoff, J. Gayvert, Q. Ge, G. Gidofalvi, M. Goldey, J. Gomes, C. E. González-Espinoza, S. Gulania, A. O. Gunina, M. W. D. Hanson-Heine, P. H. P. Harbach, A. Hauser, M. F. Herbst, M. Hernández Vera, M. Hodecker, Z. C. Holden, S. Houck, X. Huang, K. Hui, B. C. Huynh, M. Ivanov, Á. Jász, H. Ji, H. Jiang, B. Kaduk, S. Kähler, K. Khistyayev, J. Kim, G. Kis, P. Klunzinger, Z. Koczor-Benda, J. H. Koh, D. Kosenkov, L. Koulias, T. Kowalczyk, C. M. Krauter, K. Kue, A. Kunitsa, T. Kus, I. Ladjánszki, A. Landau, K. V. Lawler, D. Lefrancois, S. Lehtola, R. R. Li, Y.-P. Li, J. Liang, M. Liebenthal, H.-H. Lin, Y.-S. Lin, F. Liu, K.-Y. Liu, M. Loipersberger, A. Luenser, A. Manjanath, P. Manohar, E. Mansoor, S. F. Manzer, S.-P. Mao, A. V. Marenich, T. Markovich, S. Mason, S. A. Maurer, P. F. McLaughlin, M. F. S. J. Menger, J.-M. Mewes, S. A. Mewes, P. Morgante, J. W. Mullinax, K. J. Oosterbaan, G. Paran, A. C. Paul, S. K. Paul, F. Pavošević, Z. Pei, S. Prager, E. I. Proynov, Á. Rák, E. Ramos-Cordoba, B. Rana, A. E. Rask, A. Rettig, R. M. Richard, F. Rob, E. Rossomme, T. Scheele, M. Scheurer, M. Schneider, N. Sergueev, S. M. Sharada, W. Skomorowski, D. W. Small, C. J. Stein, Y.-C. Su, E. J. Sundstrom, Z. Tao, J. Thirman, G. J. Tornai, T. Tsuchimochi, N. M. Tubman, S. P. Veccham, O. Vydrov, J. Wenzel, J. Witte, A. Yamada, K. Yao, S. Yeganeh, S. R. Yost, A. Zech, I. Y. Zhang, X. Zhang, Y. Zhang, D. Zuev, A. Aspuru-Guzik, A. T. Bell, N. A. Besley, K. B. Bravaya, B. R. Brooks, D. Casanova, J.-D. Chai, S. Coriani, C. J. Cramer, G. Cserey, A. E. DePrince, III, R. A. DiStasio, Jr., A. Dreuw, B. D. Dunietz, T. R. Furlani, W. A. Goddard, III, S. Hammes-Schiffer, T. Head-Gordon, W. J. Hehre, C.-P. Hsu, T.-C. Jagau, Y. Jung, A. Klamt, J. Kong, D. S. Lambrecht, W. Liang, N. J. Mayhall, C. W. McCurdy, J. B. Neaton, C. Ochsenfeld, J. A. Parkhill, R. Peverati, V. A. Rassolov, Y. Shao, L. V. Slipchenko, T. Stauch, R. P. Steele, J. E. Subotnik, A. J. W. Thom, A. Tkatchenko, D. G. Truhlar, T. Van Voorhis, T.

A. Wesolowski, K. B. Whaley, H. L. Woodcock, III, P. M. Zimmerman, S. Faraji, P. M. W. Gill, M. Head-Gordon, J. M. Herbert and A. I. Krylov, Software for the frontiers of quantum chemistry: An overview of developments in the Q-Chem 5 package, *J. Chem. Phys.*, 2021, **155**, 084801.

## Part 2: The *s-cis* and *s-trans* conformations of vinyl epoxides and stereoselectivity of the 5,4-insertion

We studied various conformations of vinyl epoxides in terms of the orientation of the epoxide and the vinyl group across the sigma bond (*s-cis* versus *s-trans*), as well as the stereoselectivity of the 5,4-insertion. As shown in Figure S1, the calculation results indicate that *s-trans* conformation is more stable and the 5,4-insertion of *s-trans* vinyl epoxide **16** via transition state **17-ts** is more favorable.

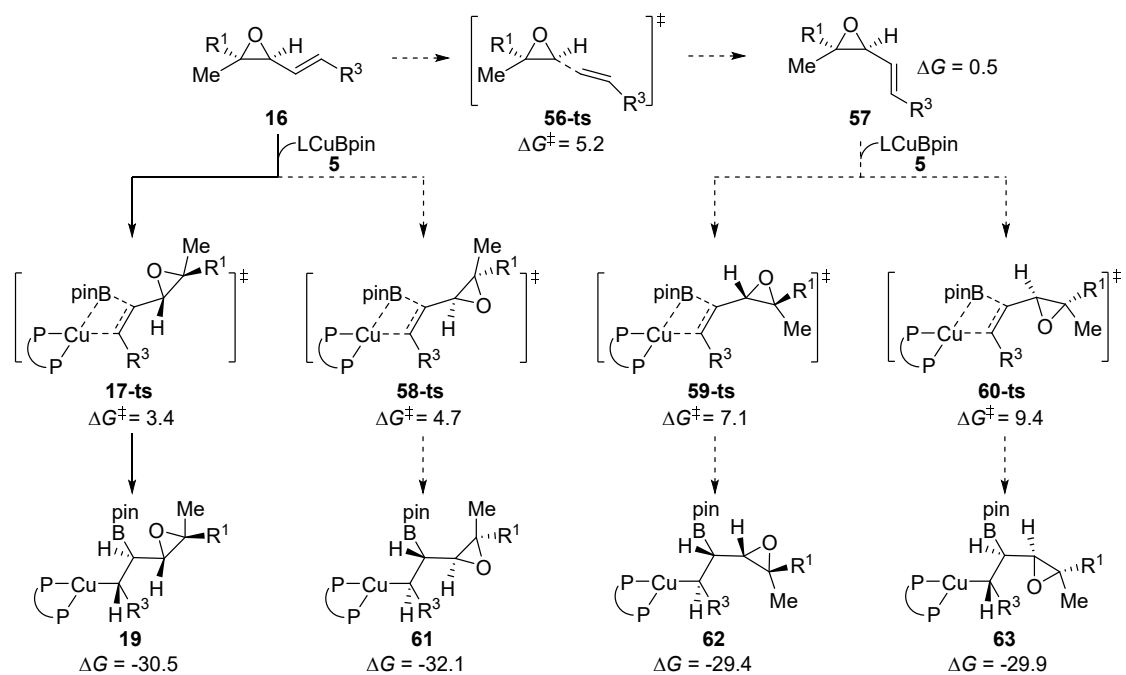

**Figure S1** Gibbs free energies for the conformations of vinyl epoxides and stereoselectivity of the 5,4-insertion. Energies are in kcal/mol.

### Part 3: The ring-opening pathway via 4,5-insertion followed by $\beta$ -oxygen elimination

The ring-opening pathway involving 4,5-insertion of the olefin, followed by  $\beta$ -oxygen elimination is also considered. As shown in Figure S2, the  $\beta$ -oxygen elimination of Cu-alkyl intermediate **20** undergoes via the four-membered ring transition states **64-ts** with an activation free energy of 5.8 kcal/mol to give the copper alkoxy intermediate **44**.

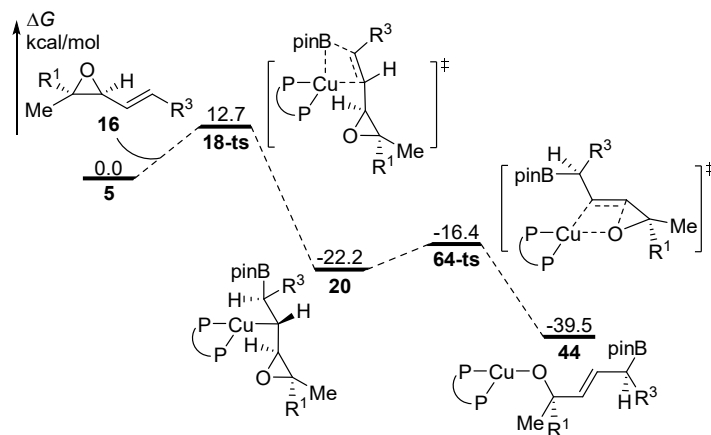

**Figure S2** Free energy profile for ring-opening pathway via 4,5-insertion and  $\beta$ -oxygen elimination. Energies are in kcal/mol.

**Part 4: Two different conformations that boryl and epoxide are in the *syn* and *anti* orientations in the cyclic complex.**

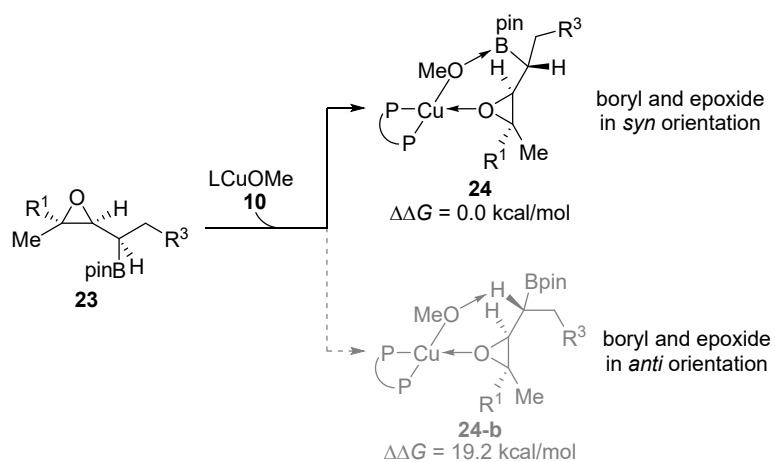

**Figure S3** Gibbs free energy difference for the cyclic complex **24** and **24-b** with different conformations that boryl and epoxide are respectively in the *syn* and *anti* orientations. Energies are in kcal/mol.

**Part 5: EDA study on the interaction energies.**

**Table S1.** Energies of all components of the interaction energies in **17-ts\_2.18** and **18-ts\_2.17**.

| $\Delta E$                 | <b>17-ts_2.18</b> | <b>18-ts_2.17</b> |
|----------------------------|-------------------|-------------------|
| $\Delta E_{\text{Pauli}}$  | 307.8             | 311.2             |
| $\Delta E_{\text{dist}}$   | 50.6              | 53.9              |
| $\Delta E_{\text{disp}}$   | -46.7             | -46.9             |
| $\Delta E_{\text{ct}}$     | -108.8            | -101.0            |
| $\Delta E_{\text{pol}}$    | -39.6             | -41.6             |
| $\Delta E_{\text{elstat}}$ | -170.4            | -172.4            |

**Part 6: Cu-catalyzed reductive ring-opening of vinyl epoxides bearing the an alkyl group on the double bond**

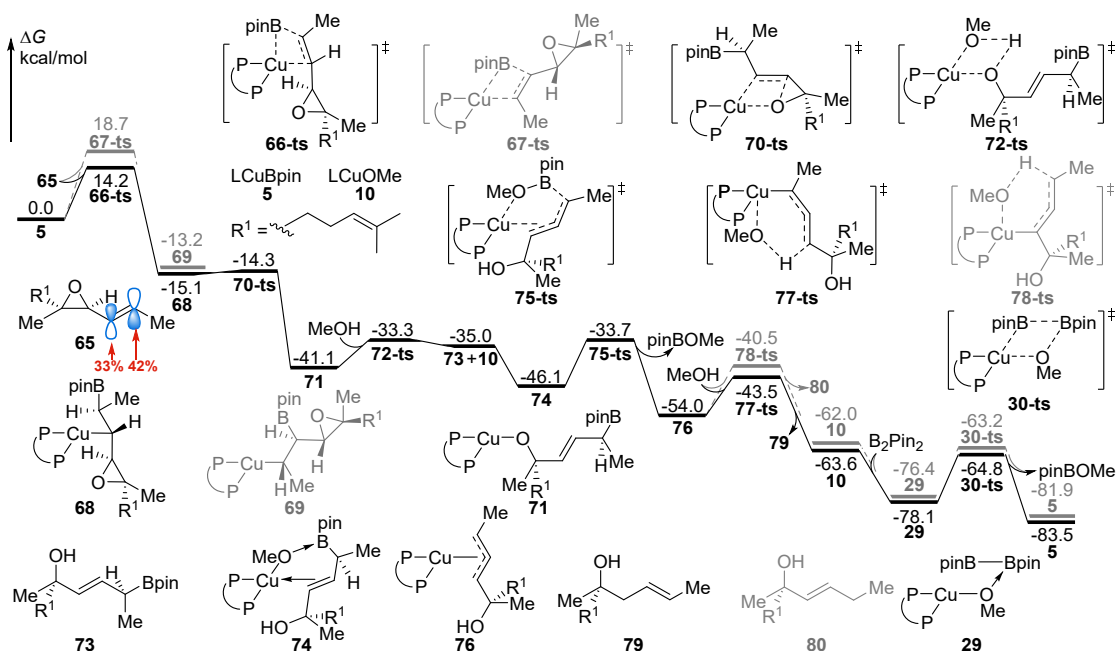

**Figure S4** Free energy profiles for Cu-catalyzed reductive ring-opening of vinyl epoxides that double bond bearing a methyl group. The data in red is the p orbital of the carbon atom contributions to vacant alkenyl  $\pi^*$  orbital. Energies are in kcal/mol.

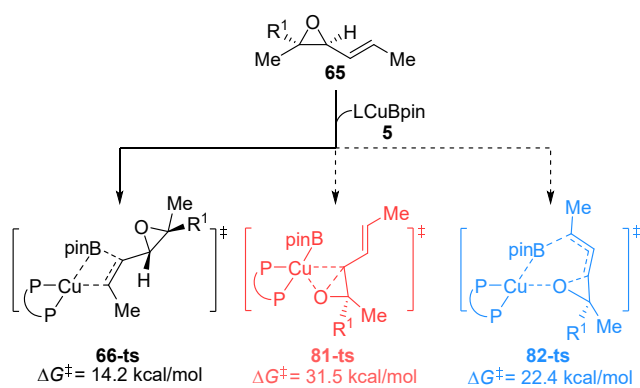

**Figure S5** Gibbs free energies for the transition states in pathway determining step of the Cu-catalyzed reductive ring-opening of vinyl epoxides that double bond bearing a methyl group. Energies are in kcal/mol.



## Part 7: The copper atomic charges

**Table S2.** The ADCH, NPA and AIM atomic charges on the Cu center along the IRCs of **17-ts**, **31-ts** and **43-ts**. The charges are in e.

| ADCH Charge  |              |              | NPA Charge   |              |              | AIM Charge   |              |              |
|--------------|--------------|--------------|--------------|--------------|--------------|--------------|--------------|--------------|
| <b>17-ts</b> | <b>31-ts</b> | <b>43-ts</b> | <b>17-ts</b> | <b>31-ts</b> | <b>43-ts</b> | <b>17-ts</b> | <b>31-ts</b> | <b>43-ts</b> |
| 0.097        | 0.076        | 0.067        | -0.089       | 0.125        | 0.123        | 0.426        | 0.334        | 0.324        |
| 0.096        | 0.075        | 0.068        | -0.087       | 0.126        | 0.126        | 0.427        | 0.337        | 0.328        |
| 0.095        | 0.082        | 0.067        | -0.085       | 0.120        | 0.139        | 0.429        | 0.347        | 0.336        |
| 0.093        | 0.088        | 0.072        | -0.082       | 0.113        | 0.141        | 0.432        | 0.358        | 0.356        |
| 0.097        | 0.091        | 0.076        | -0.074       | 0.111        | 0.130        | 0.436        | 0.379        | 0.383        |
| 0.104        | 0.130        | 0.117        | -0.034       | 0.202        | 0.257        | 0.448        | 0.444        | 0.477        |

The ADCH, NPA and AIM atomic charges on the Cu center along the reaction coordinate were computed to account for the favor of alkene insertion. Overall, the results indicate that the oxidative addition or 1,5-vinyl epoxide insertion processes require the Cu center to donate electrons comparing with alkene insertion process, which may account for higher activation free energies.

## Part 8: Energetic Information of Optimized Structures

**Table S3.** The single-point energies ( $E$ ) at M06/6-311+G(d,p)/LanL08(f)/IEF-PCM<sub>THF</sub> level, Gibbs free energy corrections (GFEC) at M06/6-31G(d,p)/LanL08(f)/IEF-PCM<sub>THF</sub> level, and Gibbs free energies ( $G = E + \text{GFEC}$ ), and imaginary frequencies (IF) of the stationary points (SPs) involved in the reaction. Energies are in a.u.

| SP                              | $E$          | GFEC     | $G$          | IF              |
|---------------------------------|--------------|----------|--------------|-----------------|
| <b>5</b>                        | -2869.897203 | 0.693329 | -2869.203874 | -               |
| <b>16</b>                       | -828.066448  | 0.290311 | -827.776137  | -               |
| <b>17-ts</b>                    | -3697.999390 | 1.024864 | -3696.974526 | 97.7 <i>i</i>   |
| <b>18-ts</b>                    | -3697.983068 | 1.023355 | -3696.959713 | 170.8 <i>i</i>  |
| <b>19</b>                       | -3698.047594 | 1.018927 | -3697.028667 | -               |
| <b>20</b>                       | -3698.036570 | 1.021168 | -3697.015402 | -               |
| <b>21-ts</b>                    | -2985.572748 | 0.739664 | -2984.833084 | 1317.8 <i>i</i> |
| MeOH                            | -115.692774  | 0.028660 | -115.664114  | -               |
| <b>22-ts</b>                    | -3813.724988 | 1.063999 | -3812.660989 | 707.83 <i>i</i> |
| <b>23</b>                       | -1239.825768 | 0.476338 | -1239.349430 | -               |
| <b>10</b>                       | -2573.896766 | 0.562036 | -2573.334730 | -               |
| <b>24</b>                       | -3813.781329 | 1.072473 | -3812.708856 | -               |
| <b>24-b</b>                     | -3813.750433 | 1.072128 | -3812.678305 | -               |
| <b>25-ts</b>                    | -3813.755777 | 1.072323 | -3812.683454 | 292.4 <i>i</i>  |
| pinBOMe                         | -526.268574  | 0.186730 | -526.081844  | -               |
| <b>26</b>                       | -3287.520918 | 0.858327 | -3286.662591 | -               |
| <b>27-ts</b>                    | -3403.225731 | 0.904522 | -3402.321209 | 201.3 <i>i</i>  |
| <b>28</b>                       | -829.300121  | 0.313363 | -828.986758  | -               |
| B <sub>2</sub> pin <sub>2</sub> | -822.235737  | 0.316525 | -821.919212  | -               |
| <b>29</b>                       | -3396.184238 | 0.907253 | -3395.276985 | -               |
| <b>30-ts</b>                    | -3396.170411 | 0.914528 | -3395.255883 | 86.3 <i>i</i>   |
| <b>31-ts</b>                    | -3697.958616 | 1.017491 | -3696.941125 | 263.0 <i>i</i>  |
| <b>32</b>                       | -3698.002874 | 1.021986 | -3696.980888 | -               |
| <b>33-ts</b>                    | -3698.002268 | 1.020962 | -3696.981306 | 36.5 <i>i</i>   |
| <b>34</b>                       | -3698.076625 | 1.019700 | -3697.056925 | -               |
| <b>35-ts</b>                    | -3813.771056 | 1.070523 | -3812.700533 | 200.6 <i>i</i>  |
| <b>36</b>                       | -1239.842434 | 0.474237 | -1239.368197 | -               |
| <b>37</b>                       | -3813.810068 | 1.078621 | -3812.731447 | -               |
| <b>38-ts</b>                    | -3813.791172 | 1.073352 | -3812.717820 | 294.6 <i>i</i>  |
| <b>39</b>                       | -3287.532707 | 0.862331 | -3286.670376 | -               |
| <b>40-ts</b>                    | -3403.215996 | 0.904843 | -3402.311153 | 1431.1 <i>i</i> |
| <b>41-ts</b>                    | -3403.208542 | 0.904124 | -3402.304418 | 1604.8 <i>i</i> |
| <b>42</b>                       | -829.307061  | 0.313769 | -828.993292  | -               |
| <b>43-ts</b>                    | -3697.964756 | 1.018202 | -3696.946554 | 92.1 <i>i</i>   |

|              |              |          |              |                 |
|--------------|--------------|----------|--------------|-----------------|
| <b>44</b>    | -3698.062340 | 1.019327 | -3697.043013 | -               |
| <b>45-ts</b> | -3813.760633 | 1.067063 | -3812.693570 | 493.8 <i>i</i>  |
| <b>46</b>    | -1239.834890 | 0.469149 | -1239.365741 | -               |
| <b>47</b>    | -3813.799386 | 1.076481 | -3812.722905 | -               |
| <b>48-ts</b> | -3813.784496 | 1.072358 | -3812.712138 | 309.4 <i>i</i>  |
| <b>49</b>    | -3287.515772 | 0.854354 | -3286.661418 | -               |
| <b>50-ts</b> | -3403.214788 | 0.902568 | -3402.312220 | 1498.5 <i>i</i> |
| <b>51-ts</b> | -3403.205179 | 0.906129 | -3402.299050 | 1550.8 <i>i</i> |
| <b>52</b>    | -3813.795909 | 1.074336 | -3812.721573 | -               |
| <b>53-ts</b> | -3813.783633 | 1.072526 | -3812.711107 | 299.4 <i>i</i>  |
| <b>54</b>    | -3287.507212 | 0.859171 | -3286.648041 | -               |
| <b>55-ts</b> | -3403.201855 | 0.900332 | -3402.301523 | 1418.5 <i>i</i> |
| <b>56-ts</b> | -828.060993  | 0.293195 | -827.767798  | 96.5 <i>i</i>   |
| <b>57</b>    | -828.066862  | 0.291526 | -827.775336  | -               |
| <b>58-ts</b> | -3697.998044 | 1.025460 | -3696.972584 | 115.1 <i>i</i>  |
| <b>59-ts</b> | -3697.992097 | 1.023396 | -3696.968701 | 145.5 <i>i</i>  |
| <b>60-ts</b> | -3697.989691 | 1.024730 | -3696.964961 | 147.5 <i>i</i>  |
| <b>61</b>    | -3698.050640 | 1.019494 | -3697.031146 | -               |
| <b>62</b>    | -3698.044461 | 1.017574 | -3697.026887 | -               |
| <b>63</b>    | -3698.047324 | 1.019643 | -3697.027681 | -               |
| <b>64-ts</b> | -3698.027668 | 1.021484 | -3697.006184 | 404.2 <i>i</i>  |
| <b>65</b>    | -544.216218  | 0.247373 | -543.968845  | -               |
| <b>66-ts</b> | -3414.128279 | 0.978124 | -3413.150155 | 198.9 <i>i</i>  |
| <b>67-ts</b> | -3414.120034 | 0.977117 | -3413.142917 | 190.8 <i>i</i>  |
| <b>68</b>    | -3414.176905 | 0.980192 | -3413.196713 | -               |
| <b>69</b>    | -3414.171987 | 0.978195 | -3413.193792 | -               |
| <b>70-ts</b> | -3414.172628 | 0.977167 | -3413.195461 | 416.8 <i>i</i>  |
| <b>71</b>    | -3414.21248  | 0.974255 | -3413.238225 | -               |
| <b>72-ts</b> | -3529.910803 | 1.020834 | -3528.889969 | 85.4 <i>i</i>   |
| <b>73</b>    | -955.987399  | 0.429582 | -955.557817  | -               |
| <b>74</b>    | -3529.942844 | 1.032615 | -3528.910229 | -               |
| <b>75-ts</b> | -3529.919816 | 1.029245 | -3528.890571 | 352.3 <i>i</i>  |
| <b>76</b>    | -3003.646153 | 0.805062 | -3002.841091 | -               |
| <b>77-ts</b> | -3119.343822 | 0.855335 | -3118.488487 | 616.6 <i>i</i>  |
| <b>78-ts</b> | -3119.343253 | 0.859681 | -3118.483572 | 1169.2 <i>i</i> |
| <b>79</b>    | -545.455546  | 0.269823 | -545.185723  | -               |
| <b>80</b>    | -545.452404  | 0.269303 | -545.183101  | -               |
| <b>81-ts</b> | -3414.097936 | 0.975493 | -3413.122443 | 202.7 <i>i</i>  |
| <b>82-ts</b> | -3414.106997 | 0.970018 | -3413.136979 | 168.6 <i>i</i>  |

---

## Part 9: Cartesian coordinates of the stationary points

|          |           |           |           |   |           |           |           |
|----------|-----------|-----------|-----------|---|-----------|-----------|-----------|
| <b>S</b> |           |           |           | H | 5.213079  | -2.784356 | -0.776127 |
| C        | -0.359045 | -2.971582 | 3.752594  | H | 4.982963  | -4.788956 | -2.226384 |
| C        | -1.100007 | -1.949939 | 3.159275  | C | -1.003888 | -2.457023 | -1.595025 |
| C        | -0.839423 | -1.680727 | 1.818246  | C | -1.248952 | -1.930791 | -2.867792 |
| C        | 0.113602  | -2.360473 | 1.057501  | C | -1.830656 | -3.471093 | -1.104304 |
| C        | 0.822337  | -3.387695 | 1.683167  | C | -2.290157 | -2.425033 | -3.645045 |
| C        | 0.585978  | -3.687303 | 3.021380  | H | -0.621300 | -1.122817 | -3.247116 |
| H        | -0.520668 | -3.220040 | 4.798871  | C | -2.883704 | -3.952663 | -1.876677 |
| H        | 1.572630  | -3.943244 | 1.123277  | H | -1.648393 | -3.888602 | -0.114761 |
| H        | 1.145164  | -4.485889 | 3.502264  | C | -3.110947 | -3.434544 | -3.148509 |
| O        | -1.541405 | -0.693945 | 1.172446  | H | -2.470894 | -2.009007 | -4.633769 |
| C        | -2.211353 | -1.159302 | 3.838638  | H | -3.525146 | -4.739258 | -1.485577 |
| C        | -2.184748 | 0.255266  | 3.273143  | H | -3.933739 | -3.812123 | -3.751441 |
| C        | -1.875074 | 0.406375  | 1.922905  | C | -1.207862 | 3.444497  | -0.868490 |
| C        | -2.510516 | 1.412712  | 3.978452  | C | -2.358721 | 4.201323  | -1.119644 |
| C        | -1.878019 | 1.632837  | 1.255435  | C | 0.043411  | 4.067313  | -0.889353 |
| C        | -2.531632 | 2.654012  | 3.346571  | C | -2.257992 | 5.562029  | -1.383393 |
| H        | -2.755105 | 1.353098  | 5.036242  | H | -3.336291 | 3.719804  | -1.107991 |
| C        | -2.218753 | 2.766584  | 1.996225  | C | 0.140779  | 5.431512  | -1.152324 |
| H        | -2.791971 | 3.542652  | 3.915946  | H | 0.938065  | 3.470123  | -0.702593 |
| H        | -2.221770 | 3.742967  | 1.516289  | C | -1.007131 | 6.177445  | -1.399821 |
| P        | 0.400947  | -1.757334 | -0.652239 | H | -3.155370 | 6.144609  | -1.578518 |
| P        | -1.270794 | 1.657720  | -0.477607 | H | 1.117317  | 5.909888  | -1.170765 |
| C        | -3.560289 | -1.799390 | 3.455465  | H | -0.929386 | 7.241881  | -1.609362 |
| H        | -3.706624 | -1.808977 | 2.368644  | C | -2.697573 | 1.071503  | -1.472955 |
| H        | -3.602748 | -2.834977 | 3.815833  | C | -2.664701 | 1.293721  | -2.855684 |
| H        | -4.386524 | -1.236883 | 3.908035  | C | -3.755984 | 0.339864  | -0.929823 |
| C        | -2.073594 | -1.173967 | 5.356055  | C | -3.680528 | 0.814128  | -3.672814 |
| H        | -2.895718 | -0.624138 | 5.826857  | H | -1.839359 | 1.854332  | -3.295815 |
| H        | -2.129336 | -2.199183 | 5.737404  | C | -4.763273 | -0.156075 | -1.753530 |
| H        | -1.125453 | -0.731536 | 5.683597  | H | -3.803873 | 0.158123  | 0.142717  |
| Cu       | 0.793700  | 0.563306  | -0.439730 | C | -4.731136 | 0.082857  | -3.123217 |
| C        | 1.833128  | -2.767807 | -1.186941 | H | -3.647445 | 1.004027  | -4.743441 |
| C        | 1.710396  | -3.900910 | -1.994717 | H | -5.579774 | -0.728061 | -1.318333 |
| C        | 3.105245  | -2.367996 | -0.754313 | H | -5.521953 | -0.301730 | -3.763339 |
| C        | 2.841525  | -4.622085 | -2.369759 | B | 2.661298  | 1.201089  | 0.002605  |
| H        | 0.727169  | -4.223069 | -2.334577 | O | 3.418322  | 2.104325  | -0.747485 |
| C        | 4.229797  | -3.099261 | -1.120960 | O | 3.457504  | 0.679585  | 1.026304  |
| H        | 3.210583  | -1.483856 | -0.121032 | C | 4.804707  | 1.946647  | -0.385382 |
| C        | 4.101094  | -4.223647 | -1.933758 | C | 4.704379  | 1.400374  | 1.061830  |
| H        | 2.735794  | -5.500283 | -3.002622 | C | 5.405725  | 0.943136  | -1.362693 |

|   |          |           |           |   |           |           |           |
|---|----------|-----------|-----------|---|-----------|-----------|-----------|
| H | 5.256722 | 1.314386  | -2.382893 | H | -1.438042 | -1.789870 | -0.281527 |
| H | 6.482104 | 0.806306  | -1.202350 | C | -3.169121 | -0.517273 | -0.010875 |
| H | 4.909644 | -0.033132 | -1.284937 | C | -4.045759 | -1.584097 | -0.257956 |
| C | 5.514900 | 3.278614  | -0.517626 | C | -3.715440 | 0.755804  | 0.219749  |
| H | 6.548152 | 3.205017  | -0.153622 | C | -5.418049 | -1.399506 | -0.267108 |
| H | 5.550408 | 3.577333  | -1.571657 | H | -3.634510 | -2.574800 | -0.441281 |
| H | 5.004525 | 4.069401  | 0.040221  | C | -5.083197 | 0.954005  | 0.215431  |
| C | 5.811584 | 0.446741  | 1.464133  | H | -3.060969 | 1.605253  | 0.398325  |
| H | 6.793828 | 0.931773  | 1.390904  | C | -5.945032 | -0.125324 | -0.027939 |
| H | 5.668496 | 0.130252  | 2.503807  | H | -6.087732 | -2.233655 | -0.457992 |
| H | 5.817463 | -0.450750 | 0.837262  | H | -5.497973 | 1.942471  | 0.393960  |
| C | 4.561640 | 2.500221  | 2.105478  | C | -7.358945 | 0.078123  | -0.036749 |
| H | 4.281649 | 2.044865  | 3.061911  | N | -8.511137 | 0.244863  | -0.043842 |
| H | 5.499134 | 3.050858  | 2.249891  | H | 0.862613  | -1.316542 | 0.127927  |
| H | 3.775061 | 3.209909  | 1.824121  |   |           |           |           |

**17-ts**

|           |           |           |           |   |           |           |           |
|-----------|-----------|-----------|-----------|---|-----------|-----------|-----------|
| <b>16</b> |           |           |           | C | 2.796284  | -1.377375 | -0.506385 |
| C         | 0.658374  | -0.249152 | 0.269823  | C | 3.875676  | -2.251608 | -0.989108 |
| C         | 1.724543  | 0.682452  | -0.157511 | C | 3.593302  | -3.454170 | -1.844784 |
| C         | 1.419058  | 2.094199  | -0.576093 | H | 3.554378  | -4.357151 | -1.223286 |
| H         | 2.184940  | 2.778083  | -0.193062 | H | 2.642344  | -3.365177 | -2.377714 |
| H         | 1.413779  | 2.176279  | -1.669013 | H | 4.383656  | -3.595720 | -2.591694 |
| H         | 0.452845  | 2.438772  | -0.199395 | C | 5.165708  | -2.279163 | -0.207336 |
| C         | 2.998966  | 0.087068  | -0.707540 | H | 5.186058  | -1.411639 | 0.467832  |
| H         | 3.063065  | -0.964474 | -0.395293 | H | 5.190832  | -3.175219 | 0.430411  |
| H         | 2.958143  | 0.091137  | -1.807093 | C | 6.409938  | -2.232578 | -1.099665 |
| C         | 4.256616  | 0.819219  | -0.230341 | H | 6.491144  | -3.163946 | -1.676416 |
| H         | 4.234595  | 1.856923  | -0.597347 | H | 6.272577  | -1.427953 | -1.836151 |
| H         | 4.232879  | 0.877881  | 0.865776  | C | 7.662683  | -2.023879 | -0.302648 |
| C         | 5.499538  | 0.151587  | -0.724881 | H | 8.198139  | -2.924349 | 0.008128  |
| H         | 5.596860  | 0.123850  | -1.814993 | C | 8.147616  | -0.842356 | 0.100635  |
| C         | 6.472114  | -0.428780 | -0.009896 | C | 9.393106  | -0.747545 | 0.927661  |
| C         | 7.644380  | -1.074332 | -0.686182 | H | 9.840171  | -1.730074 | 1.112462  |
| H         | 7.585181  | -1.000073 | -1.777062 | H | 10.146427 | -0.115159 | 0.436753  |
| H         | 8.588330  | -0.613768 | -0.361998 | H | 9.185577  | -0.277001 | 1.899664  |
| H         | 7.715966  | -2.137880 | -0.418027 | C | 7.511701  | 0.475893  | -0.224421 |
| C         | 6.514231  | -0.503860 | 1.485757  | H | 6.539252  | 0.380926  | -0.720078 |
| H         | 5.655942  | -0.036279 | 1.975142  | H | 7.365733  | 1.062777  | 0.694470  |
| H         | 6.561037  | -1.551289 | 1.814696  | H | 8.167488  | 1.079986  | -0.867384 |
| H         | 7.425061  | -0.023105 | 1.868997  | O | 3.611693  | -0.976342 | -1.599671 |
| O         | 1.507231  | 0.393070  | 1.221431  | C | 1.351129  | -1.669090 | -0.722853 |
| C         | -0.767186 | 0.098131  | 0.317117  | C | 0.727875  | -2.294671 | 0.428162  |
| H         | -1.010251 | 1.111395  | 0.638285  | C | -0.249609 | -3.343804 | 0.402617  |
| C         | -1.732032 | -0.774749 | -0.003737 | C | -0.692345 | -3.920614 | 1.623360  |

|    |           |           |           |   |           |           |           |
|----|-----------|-----------|-----------|---|-----------|-----------|-----------|
| C  | -0.814521 | -3.865234 | -0.788614 | C | 2.108859  | 0.753587  | 2.321970  |
| C  | -1.672698 | -4.886765 | 1.658043  | C | 2.506612  | -0.169132 | 3.294519  |
| H  | -0.251294 | -3.568589 | 2.556238  | C | 3.091736  | 1.421860  | 1.578225  |
| C  | -1.804766 | -4.823189 | -0.760720 | C | 3.858919  | -0.420520 | 3.518371  |
| H  | -0.477179 | -3.487353 | -1.751321 | H | 1.756618  | -0.704951 | 3.875973  |
| C  | -2.266032 | -5.343450 | 0.464164  | C | 4.439283  | 1.183534  | 1.818459  |
| H  | -2.003955 | -5.297407 | 2.610157  | H | 2.797299  | 2.103136  | 0.781893  |
| H  | -2.241867 | -5.175241 | -1.693904 | C | 4.827999  | 0.256098  | 2.783877  |
| C  | -3.304455 | -6.311125 | 0.498192  | H | 4.153242  | -1.146062 | 4.273052  |
| N  | -4.160949 | -7.104020 | 0.529509  | H | 5.189246  | 1.713222  | 1.234465  |
| H  | 2.993411  | -0.831325 | 0.420334  | H | 5.884756  | 0.056346  | 2.955291  |
| H  | 1.115747  | -2.085838 | -1.705481 | C | -0.575013 | 0.409286  | 3.328696  |
| H  | 1.238131  | -2.151990 | 1.385249  | C | -1.321474 | -0.767993 | 3.267618  |
| C  | -0.326764 | 5.446088  | 1.247366  | C | -0.537767 | 1.139708  | 4.521319  |
| C  | -1.236196 | 4.523233  | 0.733818  | C | -2.021494 | -1.219214 | 4.383478  |
| C  | -1.012444 | 3.178926  | 1.026261  | H | -1.350331 | -1.330810 | 2.333590  |
| C  | 0.094039  | 2.721039  | 1.743642  | C | -1.237157 | 0.690016  | 5.635000  |
| C  | 0.965507  | 3.680594  | 2.265849  | H | 0.040607  | 2.061983  | 4.575801  |
| C  | 0.752489  | 5.032670  | 2.023311  | C | -1.977963 | -0.490400 | 5.567140  |
| H  | -0.463444 | 6.506586  | 1.050280  | H | -2.606621 | -2.135454 | 4.314273  |
| H  | 1.830803  | 3.364517  | 2.844479  | H | -1.206828 | 1.260623  | 6.560407  |
| H  | 1.438403  | 5.770156  | 2.432167  | H | -2.524877 | -0.836592 | 6.441228  |
| O  | -1.901206 | 2.226105  | 0.593566  | C | -2.878514 | -1.446267 | -2.097661 |
| C  | -2.474226 | 4.887099  | -0.071899 | C | -4.159335 | -2.002348 | -2.163860 |
| C  | -2.739265 | 3.752072  | -1.051541 | C | -1.959375 | -1.725009 | -3.114682 |
| C  | -2.487165 | 2.446920  | -0.628000 | C | -4.507043 | -2.842634 | -3.217331 |
| C  | -3.276511 | 3.912873  | -2.327756 | H | -4.888393 | -1.786098 | -1.385078 |
| C  | -2.800590 | 1.316020  | -1.385144 | C | -2.312407 | -2.559720 | -4.170392 |
| C  | -3.574425 | 2.810096  | -3.123477 | H | -0.968624 | -1.272141 | -3.082312 |
| H  | -3.473735 | 4.911151  | -2.710413 | C | -3.583445 | -3.127076 | -4.219030 |
| C  | -3.354048 | 1.520451  | -2.651571 | H | -5.504025 | -3.275366 | -3.254658 |
| H  | -3.995693 | 2.957415  | -4.114637 | H | -1.589599 | -2.770665 | -4.955428 |
| H  | -3.601115 | 0.664188  | -3.275398 | H | -3.855815 | -3.786264 | -5.040022 |
| P  | 0.349738  | 0.905604  | 1.828445  | C | -3.614622 | -0.685773 | 0.558334  |
| P  | -2.354453 | -0.340116 | -0.730543 | C | -4.471127 | 0.278841  | 1.090534  |
| C  | -3.673406 | 4.975169  | 0.892118  | C | -3.661396 | -1.991055 | 1.066807  |
| H  | -3.827089 | 4.030710  | 1.427567  | C | -5.349006 | -0.052519 | 2.121012  |
| H  | -3.504057 | 5.764516  | 1.635326  | H | -4.467559 | 1.293641  | 0.697072  |
| H  | -4.589506 | 5.208472  | 0.335077  | C | -4.547360 | -2.322835 | 2.082970  |
| C  | -2.312212 | 6.225456  | -0.783317 | H | -3.007404 | -2.759481 | 0.656113  |
| H  | -3.218183 | 6.479867  | -1.343652 | C | -5.389597 | -1.350212 | 2.619420  |
| H  | -2.158555 | 7.034038  | -0.061069 | H | -6.011356 | 0.708449  | 2.527294  |
| H  | -1.463631 | 6.214808  | -1.478993 | H | -4.576874 | -3.345798 | 2.455713  |
| Cu | -0.131274 | -0.420395 | -0.042056 | H | -6.079322 | -1.605526 | 3.420420  |

|              |           |           |           |   |           |           |           |
|--------------|-----------|-----------|-----------|---|-----------|-----------|-----------|
| B            | 0.897840  | 0.420043  | -1.596829 | H | 6.381678  | -0.742712 | -0.741256 |
| O            | 1.785773  | 1.445797  | -1.381608 | H | 7.034269  | -0.665816 | 0.885648  |
| O            | 0.495527  | 0.353411  | -2.909843 | O | 3.122390  | 1.522096  | 1.053663  |
| C            | 1.755436  | 2.295945  | -2.552686 | C | 0.803757  | 2.238454  | 0.416983  |
| C            | 1.262324  | 1.324398  | -3.667113 | C | -0.147036 | 2.294133  | -0.718954 |
| C            | 0.765754  | 3.412453  | -2.244774 | C | -1.187478 | 3.358568  | -0.700892 |
| H            | 1.067792  | 3.903489  | -1.309947 | C | -1.445272 | 4.096199  | -1.862850 |
| H            | 0.738522  | 4.168394  | -3.038884 | C | -1.926171 | 3.653390  | 0.453951  |
| H            | -0.249738 | 3.017976  | -2.103638 | C | -2.420664 | 5.082023  | -1.888871 |
| C            | 3.140229  | 2.866998  | -2.768961 | H | -0.874134 | 3.877986  | -2.764710 |
| H            | 3.181954  | 3.447666  | -3.699338 | C | -2.903119 | 4.630420  | 0.443378  |
| H            | 3.393155  | 3.538026  | -1.939333 | H | -1.752290 | 3.083828  | 1.365034  |
| H            | 3.896015  | 2.077388  | -2.810398 | C | -3.161930 | 5.351478  | -0.732856 |
| C            | 0.347378  | 1.953916  | -4.697981 | H | -2.614398 | 5.644876  | -2.798824 |
| H            | 0.860463  | 2.768014  | -5.226207 | H | -3.479772 | 4.838194  | 1.342119  |
| H            | 0.058845  | 1.201082  | -5.440277 | C | -4.175850 | 6.356012  | -0.749165 |
| H            | -0.567649 | 2.348496  | -4.243298 | N | -5.004828 | 7.174113  | -0.762206 |
| C            | 2.382765  | 0.560303  | -4.354746 | H | 2.467207  | 1.934691  | -0.922415 |
| H            | 1.936844  | -0.214782 | -4.988708 | H | 0.500170  | 2.771854  | 1.320670  |
| H            | 2.982382  | 1.216270  | -4.997199 | H | 0.356708  | 2.247183  | -1.692441 |
| H            | 3.035654  | 0.068796  | -3.624680 | C | -4.079344 | -3.899123 | 1.219441  |
|              |           |           |           | C | -2.905257 | -3.794055 | 0.475048  |
| <b>18-ts</b> |           |           |           | C | -2.012619 | -2.785175 | 0.839279  |
| C            | 2.245347  | 2.200452  | 0.121561  | C | -2.283099 | -1.841424 | 1.835778  |
| C            | 3.337857  | 2.918260  | 0.809926  | C | -3.458211 | -2.004267 | 2.575342  |
| C            | 3.074267  | 3.808950  | 1.991180  | C | -4.343792 | -3.032201 | 2.275798  |
| H            | 3.045928  | 4.862028  | 1.685299  | H | -4.799734 | -4.678720 | 0.985044  |
| H            | 2.122861  | 3.563196  | 2.474288  | H | -3.691283 | -1.303890 | 3.374806  |
| H            | 3.869119  | 3.701482  | 2.740799  | H | -5.254495 | -3.150299 | 2.857232  |
| C            | 4.633162  | 3.160236  | 0.071254  | O | -0.805551 | -2.674753 | 0.202828  |
| H            | 4.634060  | 2.525346  | -0.826237 | C | -2.531283 | -4.743216 | -0.659141 |
| H            | 4.695040  | 4.202433  | -0.273476 | C | -1.609440 | -4.006808 | -1.624963 |
| C            | 5.857069  | 2.792756  | 0.928272  | C | -0.757002 | -3.027302 | -1.122466 |
| H            | 6.127760  | 3.637277  | 1.576927  | C | -1.484491 | -4.310257 | -2.983006 |
| H            | 5.565244  | 1.972412  | 1.598139  | C | 0.199255  | -2.360798 | -1.893498 |
| C            | 7.038325  | 2.382176  | 0.102795  | C | -0.537447 | -3.672840 | -3.779514 |
| H            | 7.694190  | 3.182705  | -0.249429 | H | -2.122156 | -5.069113 | -3.429536 |
| C            | 7.328813  | 1.128802  | -0.272882 | C | 0.307922  | -2.708149 | -3.238379 |
| C            | 8.529924  | 0.821831  | -1.114652 | H | -0.454405 | -3.936545 | -4.830916 |
| H            | 9.107761  | 1.721172  | -1.353111 | H | 1.050111  | -2.216427 | -3.864459 |
| H            | 9.196926  | 0.111547  | -0.605161 | P | -1.166391 | -0.392865 | 2.012101  |
| H            | 8.239788  | 0.340056  | -2.060065 | P | 1.200196  | -1.107025 | -1.008796 |
| C            | 6.515162  | -0.070739 | 0.119987  | C | -1.752393 | -5.931243 | -0.064639 |
| H            | 5.520871  | 0.185006  | 0.504103  | H | -0.849512 | -5.594921 | 0.458423  |

|    |           |           |           |           |           |           |           |
|----|-----------|-----------|-----------|-----------|-----------|-----------|-----------|
| H  | -2.381120 | -6.475379 | 0.651543  | H         | 2.392709  | -3.798774 | -1.505062 |
| H  | -1.449749 | -6.622917 | -0.861046 | C         | 3.764680  | -2.473806 | 1.869558  |
| C  | -3.774399 | -5.268266 | -1.374365 | H         | 2.533872  | -0.736330 | 1.500886  |
| H  | -3.500669 | -5.968147 | -2.170615 | C         | 4.181868  | -3.709323 | 1.384441  |
| H  | -4.419535 | -5.826717 | -0.688332 | H         | 4.013660  | -5.148682 | -0.211223 |
| H  | -4.357790 | -4.450085 | -1.814801 | H         | 4.144546  | -2.096046 | 2.817042  |
| Cu | -0.088045 | 0.417573  | 0.183567  | H         | 4.892077  | -4.306790 | 1.951758  |
| C  | -2.238987 | 0.833621  | 2.863832  | B         | -1.531020 | 0.872287  | -1.283221 |
| C  | -1.832378 | 1.490507  | 4.028286  | O         | -2.844978 | 0.955708  | -0.885274 |
| C  | -3.447485 | 1.209584  | 2.259594  | O         | -1.428913 | 0.560497  | -2.618976 |
| C  | -2.616824 | 2.502126  | 4.579104  | C         | -3.680908 | 0.426914  | -1.937240 |
| H  | -0.899011 | 1.212900  | 4.514671  | C         | -2.754581 | 0.494086  | -3.197787 |
| C  | -4.236098 | 2.205269  | 2.822858  | C         | -4.053974 | -0.991108 | -1.529478 |
| H  | -3.755928 | 0.741316  | 1.325556  | H         | -4.553383 | -0.956439 | -0.553353 |
| C  | -3.820748 | 2.859045  | 3.981526  | H         | -4.742664 | -1.452450 | -2.247765 |
| H  | -2.285662 | 3.005649  | 5.484465  | H         | -3.168017 | -1.632099 | -1.431774 |
| H  | -5.171506 | 2.485307  | 2.342504  | C         | -4.930245 | 1.282836  | -2.012198 |
| H  | -4.434550 | 3.645088  | 4.415344  | H         | -5.573214 | 0.970842  | -2.844913 |
| C  | 0.034208  | -0.889270 | 3.303707  | H         | -5.501349 | 1.171383  | -1.082785 |
| C  | 1.146166  | -0.059866 | 3.495362  | H         | -4.685328 | 2.343592  | -2.130821 |
| C  | -0.103394 | -2.041716 | 4.079270  | C         | -2.813309 | -0.724922 | -4.097770 |
| C  | 2.092655  | -0.366857 | 4.465920  | H         | -3.815596 | -0.841579 | -4.529446 |
| H  | 1.284241  | 0.808116  | 2.846834  | H         | -2.101738 | -0.599406 | -4.923159 |
| C  | 0.858858  | -2.359030 | 5.035723  | H         | -2.545215 | -1.642796 | -3.564901 |
| H  | -0.962327 | -2.695915 | 3.936260  | C         | -2.942296 | 1.749386  | -4.035148 |
| C  | 1.951220  | -1.520234 | 5.235603  | H         | -2.133483 | 1.804066  | -4.773178 |
| H  | 2.953379  | 0.284627  | 4.604186  | H         | -3.896190 | 1.731031  | -4.575307 |
| H  | 0.750757  | -3.263673 | 5.629673  | H         | -2.905938 | 2.656994  | -3.423766 |
| H  | 2.698282  | -1.769567 | 5.985799  |           |           |           |           |
| C  | 2.292962  | -0.377886 | -2.288181 | <b>19</b> |           |           |           |
| C  | 3.679094  | -0.350910 | -2.106264 | C         | -3.984489 | -0.435057 | 0.093513  |
| C  | 1.732884  | 0.334269  | -3.358141 | C         | -5.167276 | 0.073463  | -0.615363 |
| C  | 4.490122  | 0.384064  | -2.966913 | C         | -5.063340 | 0.747193  | -1.955130 |
| H  | 4.130080  | -0.891082 | -1.274607 | H         | -5.067526 | 1.837745  | -1.838416 |
| C  | 2.549105  | 1.052118  | -4.225870 | H         | -4.154300 | 0.455291  | -2.490803 |
| H  | 0.651984  | 0.335351  | -3.495569 | H         | -5.916812 | 0.475660  | -2.587820 |
| C  | 3.927924  | 1.088194  | -4.027276 | C         | -6.403417 | 0.400985  | 0.190166  |
| H  | 5.565978  | 0.414378  | -2.797141 | H         | -6.298933 | -0.031948 | 1.195064  |
| H  | 2.104052  | 1.596565  | -5.055940 | H         | -6.474863 | 1.491396  | 0.321676  |
| H  | 4.561041  | 1.665569  | -4.696891 | C         | -7.691680 | -0.135583 | -0.438945 |
| C  | 2.352254  | -2.183652 | -0.070816 | H         | -7.842681 | 0.335092  | -1.422877 |
| C  | 2.775805  | -3.425432 | -0.555495 | H         | -7.562192 | -1.209409 | -0.626475 |
| C  | 2.852706  | -1.712877 | 1.142773  | C         | -8.882426 | 0.141331  | 0.421660  |
| C  | 3.687048  | -4.183841 | 0.170467  | H         | -9.102400 | 1.204371  | 0.564537  |



|   |            |           |           |    |           |           |           |
|---|------------|-----------|-----------|----|-----------|-----------|-----------|
| C | -9.674645  | -0.735508 | 1.052260  | C  | 2.524746  | -0.648512 | -3.857957 |
| C | -10.821262 | -0.269648 | 1.898749  | H  | 3.309352  | -1.936943 | -5.388892 |
| H | -10.900723 | 0.822239  | 1.922810  | H  | 1.900422  | -0.079338 | -4.543458 |
| H | -11.774022 | -0.674291 | 1.528342  | P  | 1.794148  | -0.072321 | 2.014897  |
| H | -10.718931 | -0.628853 | 2.932605  | P  | 1.369407  | 0.873043  | -1.735929 |
| C | -9.527396  | -2.225435 | 0.992002  | C  | 6.341007  | -2.124490 | -0.991091 |
| H | -8.674722  | -2.559074 | 0.394996  | H  | 6.196875  | -1.076592 | -0.701925 |
| H | -9.413113  | -2.640317 | 2.003180  | H  | 6.995534  | -2.597694 | -0.248293 |
| H | -10.434078 | -2.685615 | 0.574646  | H  | 6.845752  | -2.144082 | -1.965179 |
| O | -4.850365  | -1.325858 | -0.617153 | C  | 5.265016  | -4.321494 | -1.490184 |
| C | -2.544107  | -0.347291 | -0.366778 | H  | 5.772253  | -4.363234 | -2.459510 |
| C | -1.689749  | 0.477456  | 0.587810  | H  | 5.930375  | -4.817151 | -0.775792 |
| C | -1.696064  | 1.918982  | 0.518313  | H  | 4.333813  | -4.897366 | -1.557705 |
| C | -1.292581  | 2.692585  | 1.646679  | Cu | 0.330002  | 0.300558  | 0.247610  |
| C | -2.009794  | 2.653878  | -0.660109 | C  | 0.958489  | -0.444125 | 3.598056  |
| C | -1.188389  | 4.064334  | 1.599908  | C  | 1.394897  | 0.039099  | 4.833692  |
| H | -1.057204  | 2.166657  | 2.573884  | C  | -0.158632 | -1.287601 | 3.539444  |
| C | -1.915820  | 4.028623  | -0.708427 | C  | 0.722911  | -0.320267 | 5.999420  |
| H | -2.310856  | 2.118921  | -1.559829 | H  | 2.264901  | 0.692594  | 4.885624  |
| C | -1.498183  | 4.766489  | 0.416212  | C  | -0.816608 | -1.655106 | 4.708085  |
| H | -0.872420  | 4.618538  | 2.482540  | H  | -0.514700 | -1.655441 | 2.574048  |
| H | -2.154129  | 4.553716  | -1.632337 | C  | -0.378347 | -1.169161 | 5.938112  |
| C | -1.383404  | 6.178878  | 0.357533  | H  | 1.065151  | 0.061138  | 6.958726  |
| N | -1.279685  | 7.341439  | 0.308578  | H  | -1.679873 | -2.314753 | 4.657492  |
| H | -4.077990  | -0.525660 | 1.184828  | H  | -0.899573 | -1.449417 | 6.850525  |
| H | -2.510364  | 0.078678  | -1.379319 | C  | 2.921504  | 1.315325  | 2.401093  |
| H | -1.760746  | 0.110120  | 1.620907  | C  | 2.403274  | 2.612700  | 2.337658  |
| C | 4.482004   | -3.763163 | 1.295935  | C  | 4.259362  | 1.128268  | 2.759992  |
| C | 4.326126   | -2.807028 | 0.291136  | C  | 3.209419  | 3.705670  | 2.633774  |
| C | 3.549586   | -1.692427 | 0.599615  | H  | 1.362814  | 2.768765  | 2.045292  |
| C | 2.923001   | -1.506064 | 1.834244  | C  | 5.067344  | 2.225219  | 3.043882  |
| C | 3.120080   | -2.475807 | 2.818659  | H  | 4.670979  | 0.121781  | 2.821893  |
| C | 3.895265   | -3.598331 | 2.547199  | C  | 4.544610  | 3.513737  | 2.980081  |
| H | 5.077764   | -4.652788 | 1.106906  | H  | 2.795667  | 4.710478  | 2.574803  |
| H | 2.645153   | -2.359416 | 3.791334  | H  | 6.108696  | 2.071509  | 3.317335  |
| H | 4.042060   | -4.353683 | 3.314864  | H  | 5.178091  | 4.369685  | 3.200774  |
| O | 3.348556   | -0.707133 | -0.333254 | C  | 0.214045  | 1.262994  | -3.098854 |
| C | 4.999528   | -2.877514 | -1.074206 | C  | 0.174841  | 2.485145  | -3.770991 |
| C | 4.111649   | -2.160202 | -2.084169 | C  | -0.730410 | 0.276388  | -3.408764 |
| C | 3.337334   | -1.085617 | -1.650745 | C  | -0.813428 | 2.726488  | -4.723367 |
| C | 4.075647   | -2.452471 | -3.447985 | H  | 0.905902  | 3.258771  | -3.543217 |
| C | 2.512577   | -0.337726 | -2.496609 | C  | -1.706716 | 0.515163  | -4.368286 |
| C | 3.305919   | -1.697511 | -4.328794 | H  | -0.707060 | -0.683563 | -2.888489 |
| H | 4.667256   | -3.276198 | -3.839451 | C  | -1.757091 | 1.747594  | -5.018858 |

|           |           |           |           |   |           |           |           |
|-----------|-----------|-----------|-----------|---|-----------|-----------|-----------|
| H         | -0.843559 | 3.685091  | -5.236220 | H | -4.708586 | 1.970920  | -0.959293 |
| H         | -2.437199 | -0.258894 | -4.595513 | H | -5.840814 | 0.770965  | -0.329910 |
| H         | -2.530025 | 1.941538  | -5.758788 | C | -5.491622 | 2.474264  | 0.982182  |
| C         | 2.352941  | 2.390331  | -1.473950 | H | -5.984675 | 1.962948  | 1.820172  |
| C         | 3.733443  | 2.446984  | -1.672968 | H | -4.602389 | 2.965562  | 1.404253  |
| C         | 1.685429  | 3.511960  | -0.963019 | C | -6.425362 | 3.487133  | 0.391549  |
| C         | 4.433641  | 3.615359  | -1.381085 | H | -7.493101 | 3.262685  | 0.455113  |
| H         | 4.266644  | 1.579273  | -2.060029 | C | -6.064198 | 4.610167  | -0.243360 |
| C         | 2.384352  | 4.681681  | -0.693807 | C | -7.082131 | 5.544365  | -0.823022 |
| H         | 0.609755  | 3.472765  | -0.781218 | H | -8.105858 | 5.193997  | -0.653476 |
| C         | 3.761441  | 4.734547  | -0.900113 | H | -6.987475 | 6.549535  | -0.387769 |
| H         | 5.509162  | 3.650993  | -1.538161 | H | -6.936274 | 5.665718  | -1.905804 |
| H         | 1.853425  | 5.549950  | -0.307626 | C | -4.640835 | 5.037086  | -0.443710 |
| H         | 4.311537  | 5.645591  | -0.676196 | H | -3.911532 | 4.326858  | -0.040745 |
| B         | -1.960031 | -1.793702 | -0.505708 | H | -4.427721 | 5.160614  | -1.514919 |
| O         | -1.560324 | -2.572725 | 0.554283  | H | -4.458246 | 6.017947  | 0.017942  |
| O         | -1.773390 | -2.414329 | -1.716357 | O | -2.626528 | 1.381716  | 0.524173  |
| C         | -0.825160 | -3.688617 | -0.002052 | C | -1.764390 | -0.786710 | -0.435187 |
| C         | -1.416570 | -3.787686 | -1.439455 | C | -2.074911 | -1.785099 | -1.591869 |
| C         | 0.645371  | -3.299293 | 0.009352  | C | -3.336124 | -2.534302 | -1.274904 |
| H         | 0.963866  | -3.127682 | 1.044398  | C | -4.565707 | -2.132612 | -1.814077 |
| H         | 1.283720  | -4.086495 | -0.411172 | C | -3.335042 | -3.582239 | -0.341416 |
| H         | 0.819081  | -2.370044 | -0.555949 | C | -5.752654 | -2.743655 | -1.439213 |
| C         | -1.047408 | -4.904437 | 0.871592  | H | -4.586582 | -1.317461 | -2.537103 |
| H         | -0.559189 | -5.787142 | 0.440140  | C | -4.509405 | -4.204011 | 0.044413  |
| H         | -0.611140 | -4.727271 | 1.861994  | H | -2.385682 | -3.907744 | 0.080807  |
| H         | -2.111094 | -5.120997 | 1.003092  | C | -5.731373 | -3.785908 | -0.503502 |
| C         | -0.445792 | -4.262536 | -2.499381 | H | -6.700328 | -2.420558 | -1.863647 |
| H         | -0.082237 | -5.272058 | -2.270421 | H | -4.494224 | -5.016187 | 0.767758  |
| H         | -0.949576 | -4.297403 | -3.471588 | C | -6.947433 | -4.422760 | -0.112481 |
| H         | 0.416002  | -3.592152 | -2.587706 | N | -7.939510 | -4.943453 | 0.206412  |
| C         | -2.703446 | -4.596329 | -1.497073 | H | -2.852104 | 0.775072  | -1.488851 |
| H         | -3.160397 | -4.467830 | -2.484103 | H | -1.894810 | -1.344095 | 0.503658  |
| H         | -2.514429 | -5.664620 | -1.340697 | H | -2.235773 | -1.196850 | -2.511274 |
| H         | -3.423190 | -4.252034 | -0.744811 | C | 5.084299  | -2.078684 | 2.427245  |
|           |           |           |           | C | 4.851465  | -1.055319 | 1.509291  |
| <b>20</b> |           |           |           | C | 3.579474  | -0.485320 | 1.508250  |
| C         | -2.725523 | 0.353281  | -0.477988 | C | 2.542863  | -0.903331 | 2.346251  |
| C         | -3.846131 | 0.622263  | 0.445096  | C | 2.824247  | -1.918804 | 3.263681  |
| C         | -4.112074 | -0.256398 | 1.635631  | C | 4.087189  | -2.499107 | 3.303712  |
| H         | -4.923630 | -0.962459 | 1.416939  | H | 6.060312  | -2.555757 | 2.468320  |
| H         | -3.225500 | -0.834224 | 1.920334  | H | 2.039781  | -2.272357 | 3.930229  |
| H         | -4.413239 | 0.346679  | 2.502214  | H | 4.296102  | -3.291275 | 4.018138  |
| C         | -5.014435 | 1.440575  | -0.045420 | O | 3.280623  | 0.528982  | 0.632108  |

|    |           |           |           |              |           |           |           |
|----|-----------|-----------|-----------|--------------|-----------|-----------|-----------|
| C  | 5.899575  | -0.488463 | 0.560437  | C            | 1.049425  | 3.210443  | -3.577557 |
| C  | 5.187523  | -0.035795 | -0.708019 | C            | 0.208146  | 0.955508  | -3.802118 |
| C  | 3.903612  | 0.491888  | -0.589728 | C            | 0.612379  | 3.499503  | -4.866483 |
| C  | 5.753993  | -0.036540 | -1.983571 | H            | 1.549193  | 3.978738  | -2.988359 |
| C  | 3.173750  | 1.000630  | -1.667806 | C            | -0.217544 | 1.245845  | -5.095163 |
| C  | 5.066992  | 0.484200  | -3.076863 | H            | 0.054913  | -0.038576 | -3.379439 |
| H  | 6.752799  | -0.439954 | -2.131320 | C            | -0.020192 | 2.517621  | -5.625741 |
| C  | 3.785647  | 1.003045  | -2.922977 | H            | 0.766634  | 4.493413  | -5.280320 |
| H  | 5.535196  | 0.481890  | -4.057814 | H            | -0.711817 | 0.478137  | -5.686292 |
| H  | 3.245901  | 1.390412  | -3.785140 | H            | -0.361252 | 2.746313  | -6.632877 |
| P  | 0.856291  | -0.262620 | 2.006901  | C            | 1.492800  | 3.039840  | -0.465146 |
| P  | 1.424009  | 1.454436  | -1.369633 | C            | 2.643128  | 3.824909  | -0.360991 |
| C  | 6.532682  | 0.749686  | 1.224217  | C            | 0.301066  | 3.474912  | 0.124841  |
| H  | 5.777358  | 1.508291  | 1.461595  | C            | 2.598149  | 5.039381  | 0.318021  |
| H  | 7.034296  | 0.462392  | 2.156823  | H            | 3.573915  | 3.489838  | -0.818232 |
| H  | 7.273213  | 1.200999  | 0.551961  | C            | 0.256378  | 4.697845  | 0.784803  |
| C  | 6.996844  | -1.504047 | 0.259676  | H            | -0.592816 | 2.848313  | 0.072051  |
| H  | 7.749886  | -1.076200 | -0.410397 | C            | 1.404406  | 5.479938  | 0.882779  |
| H  | 7.526466  | -1.789458 | 1.174761  | H            | 3.496642  | 5.647218  | 0.397546  |
| H  | 6.590860  | -2.410585 | -0.205807 | H            | -0.674581 | 5.033737  | 1.235999  |
| Cu | 0.079203  | -0.026126 | -0.256442 | H            | 1.370689  | 6.431689  | 1.408432  |
| C  | -0.186723 | -1.393801 | 3.008124  | B            | -0.737209 | -2.569025 | -1.798707 |
| C  | -0.533089 | -1.143722 | 4.339707  | O            | -0.225376 | -3.552438 | -0.981420 |
| C  | -0.644275 | -2.567531 | 2.395442  | O            | 0.111730  | -2.266454 | -2.837159 |
| C  | -1.328348 | -2.044290 | 5.042200  | C            | 1.158995  | -3.755717 | -1.355342 |
| H  | -0.181573 | -0.237481 | 4.830230  | C            | 1.201521  | -3.210539 | -2.819712 |
| C  | -1.434022 | -3.469495 | 3.102462  | C            | 2.012908  | -2.944393 | -0.393246 |
| H  | -0.395708 | -2.775645 | 1.353460  | H            | 1.808810  | -3.268465 | 0.634842  |
| C  | -1.781508 | -3.206958 | 4.424675  | H            | 3.084519  | -3.084612 | -0.585173 |
| H  | -1.592890 | -1.837086 | 6.076638  | H            | 1.786284  | -1.869188 | -0.459617 |
| H  | -1.786396 | -4.376588 | 2.614668  | C            | 1.489767  | -5.226607 | -1.214042 |
| H  | -2.406346 | -3.907012 | 4.974350  | H            | 2.512114  | -5.425514 | -1.559236 |
| C  | 0.744190  | 1.318989  | 2.917097  | H            | 1.426960  | -5.517119 | -0.159418 |
| C  | -0.527110 | 1.897878  | 3.024420  | H            | 0.799880  | -5.855950 | -1.782973 |
| C  | 1.847300  | 1.976539  | 3.463902  | C            | 2.476503  | -2.479518 | -3.188323 |
| C  | -0.692333 | 3.098774  | 3.702001  | H            | 3.342051  | -3.152736 | -3.139990 |
| H  | -1.382666 | 1.405922  | 2.558448  | H            | 2.397401  | -2.098217 | -4.213637 |
| C  | 1.679531  | 3.193484  | 4.120075  | H            | 2.659069  | -1.626442 | -2.525888 |
| H  | 2.840508  | 1.535068  | 3.387664  | C            | 0.880120  | -4.267735 | -3.865202 |
| C  | 0.411020  | 3.750522  | 4.249818  | H            | 0.748039  | -3.776748 | -4.835462 |
| H  | -1.684928 | 3.536010  | 3.790734  | H            | 1.688059  | -5.002132 | -3.959798 |
| H  | 2.543786  | 3.699607  | 4.544766  | H            | -0.048186 | -4.799258 | -3.625633 |
| H  | 0.282459  | 4.696227  | 4.771699  |              |           |           |           |
| C  | 0.848484  | 1.936473  | -3.038167 | <b>21-ts</b> |           |           |           |

|    |           |           |           |   |           |           |           |
|----|-----------|-----------|-----------|---|-----------|-----------|-----------|
| C  | -1.351404 | -2.450377 | 3.597313  | C | -3.998848 | 0.865144  | 0.771261  |
| C  | -0.834804 | -1.195958 | 3.272711  | C | -4.244761 | 2.689240  | -1.321694 |
| C  | -1.105779 | -0.711102 | 1.995923  | H | -2.722104 | 1.532238  | -2.310085 |
| C  | -1.872744 | -1.398063 | 1.053211  | C | -4.892118 | 1.928196  | 0.872179  |
| C  | -2.377674 | -2.647132 | 1.417387  | H | -3.910895 | 0.151418  | 1.589601  |
| C  | -2.112575 | -3.169472 | 2.679487  | C | -5.019264 | 2.837366  | -0.173570 |
| H  | -1.161012 | -2.877602 | 4.578571  | H | -4.326703 | 3.408860  | -2.133349 |
| H  | -2.967182 | -3.218500 | 0.703175  | H | -5.493837 | 2.042832  | 1.770908  |
| H  | -2.505387 | -4.145376 | 2.952648  | H | -5.716898 | 3.667647  | -0.091186 |
| O  | -0.599295 | 0.507348  | 1.605506  | C | 2.435548  | 2.553583  | -1.264199 |
| C  | -0.049430 | -0.297215 | 4.219019  | C | 2.751379  | 3.914489  | -1.188443 |
| C  | 0.994873  | 0.437154  | 3.389178  | C | 3.301979  | 1.677040  | -1.925393 |
| C  | 0.639197  | 0.836372  | 2.101901  | C | 3.916728  | 4.393349  | -1.776262 |
| C  | 2.273772  | 0.775578  | 3.827610  | H | 2.083141  | 4.600287  | -0.669525 |
| C  | 1.487340  | 1.552452  | 1.253030  | C | 4.470471  | 2.161541  | -2.506725 |
| C  | 3.144847  | 1.493543  | 3.011860  | H | 3.068375  | 0.612698  | -1.965783 |
| H  | 2.602313  | 0.475475  | 4.819602  | C | 4.775519  | 3.517436  | -2.437318 |
| C  | 2.757304  | 1.881555  | 1.734163  | H | 4.156398  | 5.452458  | -1.717679 |
| H  | 4.136300  | 1.749965  | 3.375975  | H | 5.141576  | 1.476504  | -3.019470 |
| H  | 3.448090  | 2.429159  | 1.096405  | H | 5.685858  | 3.894921  | -2.897396 |
| P  | -2.026255 | -0.655917 | -0.615030 | C | -0.221836 | 3.248384  | -0.403477 |
| P  | 0.949298  | 1.843537  | -0.475301 | C | -0.600514 | 3.834286  | -1.618238 |
| C  | -1.020698 | 0.745566  | 4.806594  | C | -0.794651 | 3.708528  | 0.783053  |
| H  | -1.508103 | 1.332163  | 4.018188  | C | -1.518973 | 4.875382  | -1.641102 |
| H  | -1.802070 | 0.244238  | 5.391398  | H | -0.166553 | 3.475685  | -2.552407 |
| H  | -0.479489 | 1.436674  | 5.464753  | C | -1.727565 | 4.742439  | 0.755460  |
| C  | 0.581820  | -1.080954 | 5.363222  | H | -0.505764 | 3.270015  | 1.737062  |
| H  | 1.108620  | -0.407844 | 6.048379  | C | -2.088238 | 5.328983  | -0.452854 |
| H  | -0.186796 | -1.587760 | 5.956269  | H | -1.798637 | 5.328730  | -2.589468 |
| H  | 1.293351  | -1.832864 | 4.999473  | H | -2.169727 | 5.092462  | 1.685474  |
| Cu | 0.169906  | -0.200221 | -1.202879 | H | -2.814055 | 6.138775  | -0.470684 |
| C  | -2.949544 | -1.908187 | -1.569521 | B | 1.580201  | -1.804143 | -1.137719 |
| C  | -4.329766 | -2.090284 | -1.424849 | O | 2.937267  | -1.539925 | -1.101368 |
| C  | -2.229256 | -2.717607 | -2.454145 | O | 1.231114  | -2.843032 | -0.292804 |
| C  | -4.983061 | -3.076854 | -2.154101 | C | 3.552799  | -2.687313 | -0.476111 |
| H  | -4.892841 | -1.457860 | -0.738671 | C | 2.413872  | -3.198595 | 0.450306  |
| C  | -2.890606 | -3.706262 | -3.178989 | C | 3.894070  | -3.661690 | -1.596117 |
| H  | -1.154393 | -2.574495 | -2.592599 | H | 4.584268  | -3.166295 | -2.289190 |
| C  | -4.262092 | -3.885836 | -3.030889 | H | 4.382094  | -4.568036 | -1.218758 |
| H  | -6.055774 | -3.214656 | -2.040185 | H | 2.989156  | -3.928697 | -2.156553 |
| H  | -2.327720 | -4.333252 | -3.866460 | C | 4.807108  | -2.241105 | 0.244632  |
| H  | -4.774639 | -4.656635 | -3.602066 | H | 5.247537  | -3.073246 | 0.808805  |
| C  | -3.221758 | 0.709361  | -0.379509 | H | 5.550020  | -1.897726 | -0.484244 |
| C  | -3.344568 | 1.635444  | -1.420003 | H | 4.603242  | -1.416954 | 0.935705  |

|       |            |           |           |    |            |           |           |
|-------|------------|-----------|-----------|----|------------|-----------|-----------|
| C     | 2.411607   | -4.692773 | 0.694770  | H  | -8.507756  | 0.154518  | 1.863854  |
| H     | 3.342120   | -5.008078 | 1.184385  | H  | -8.747826  | 1.204240  | 3.269047  |
| H     | 1.575981   | -4.955210 | 1.354066  | H  | -10.009875 | 0.072004  | 2.809298  |
| H     | 2.298063   | -5.253020 | -0.237670 | O  | -5.949582  | -0.325252 | -0.155088 |
| C     | 2.343467   | -2.449198 | 1.773675  | C  | -3.551166  | 0.201662  | -0.757088 |
| H     | 1.389788   | -2.690996 | 2.261368  | C  | -2.369838  | 0.403260  | 0.171308  |
| H     | 3.158929   | -2.728673 | 2.452433  | H  | -4.790747  | 1.176959  | 0.789515  |
| H     | 2.374044   | -1.362902 | 1.616317  | H  | -3.384884  | 0.762264  | -1.693232 |
| C     | 1.836022   | -1.838934 | -4.116069 | H  | -2.415377  | -0.223135 | 1.069903  |
| H     | 2.864693   | -2.244177 | -4.222280 | C  | 3.079877   | -4.726277 | -0.700849 |
| H     | 1.967627   | -0.774915 | -3.797586 | C  | 3.560179   | -3.445140 | -0.970029 |
| H     | 1.408743   | -1.790427 | -5.137044 | C  | 3.101715   | -2.409345 | -0.158024 |
| O     | 1.057234   | -2.553861 | -3.236512 | C  | 2.198080   | -2.596609 | 0.890269  |
| H     | 0.812592   | -1.623419 | -2.222358 | C  | 1.756552   | -3.897667 | 1.139666  |
|       |            |           |           | C  | 2.191586   | -4.953256 | 0.346192  |
| MeOH  |            |           |           | H  | 3.405365   | -5.565625 | -1.310538 |
| C     | 0.046730   | 0.654434  | 0.000000  | H  | 1.051454   | -4.079693 | 1.948506  |
| H     | 1.090740   | 0.982580  | 0.000000  | H  | 1.836689   | -5.961352 | 0.544651  |
| H     | -0.438224  | 1.081198  | 0.890505  | O  | 3.541005   | -1.124113 | -0.373289 |
| H     | -0.438224  | 1.081198  | -0.890505 | C  | 4.599947   | -3.113132 | -2.030746 |
| O     | 0.046730   | -0.752947 | 0.000000  | C  | 4.279596   | -1.726847 | -2.571547 |
| H     | -0.868507  | -1.048005 | 0.000000  | C  | 3.794876   | -0.772412 | -1.677232 |
|       |            |           |           | C  | 4.505880   | -1.314944 | -3.884044 |
| 22-ts |            |           |           | C  | 3.548561   | 0.557374  | -2.031433 |
| C     | -4.880934  | 0.633621  | -0.159704 | C  | 4.272097   | 0.000726  | -4.271889 |
| C     | -6.109935  | 0.870704  | -0.928607 | H  | 4.877207   | -2.025372 | -4.618364 |
| C     | -6.150793  | 0.666637  | -2.418038 | C  | 3.802189   | 0.932030  | -3.353402 |
| H     | -7.103657  | 0.209220  | -2.713063 | H  | 4.459472   | 0.302214  | -5.299147 |
| H     | -6.069312  | 1.629571  | -2.937418 | H  | 3.613377   | 1.956032  | -3.668822 |
| H     | -5.345587  | 0.011944  | -2.765231 | P  | 1.604883   | -1.112118 | 1.789470  |
| C     | -7.154905  | 1.798441  | -0.356807 | P  | 2.765474   | 1.671395  | -0.801486 |
| H     | -6.957000  | 1.926993  | 0.716756  | C  | 5.980563   | -3.050296 | -1.347968 |
| H     | -7.064192  | 2.793758  | -0.816397 | H  | 5.998838   | -2.301688 | -0.547077 |
| C     | -8.579323  | 1.260218  | -0.534181 | H  | 6.229630   | -4.025515 | -0.911257 |
| H     | -8.856096  | 1.289909  | -1.596821 | H  | 6.752671   | -2.787187 | -2.081801 |
| H     | -8.577209  | 0.198135  | -0.249536 | C  | 4.647099   | -4.162942 | -3.134730 |
| C     | -9.588735  | 2.025134  | 0.268634  | H  | 5.423558   | -3.920177 | -3.867853 |
| H     | -10.096287 | 2.847499  | -0.241679 | H  | 4.908713   | -5.143903 | -2.724182 |
| C     | -9.885292  | 1.817451  | 1.558328  | H  | 3.687326   | -4.249122 | -3.657736 |
| C     | -10.892911 | 2.662070  | 2.276291  | Cu | 1.074568   | 0.522631  | 0.212418  |
| H     | -11.334051 | 3.421790  | 1.622358  | C  | 0.229342   | -1.787152 | 2.787446  |
| H     | -11.706641 | 2.044816  | 2.682744  | C  | 0.264653   | -1.945355 | 4.173996  |
| H     | -10.438129 | 3.172846  | 3.136932  | C  | -0.938050  | -2.118862 | 2.088496  |
| C     | -9.249879  | 0.753150  | 2.401409  | C  | -0.853839  | -2.434127 | 4.847411  |

|   |           |           |           |           |           |           |           |
|---|-----------|-----------|-----------|-----------|-----------|-----------|-----------|
| H | 1.164425  | -1.689651 | 4.731208  | C         | -3.829442 | -3.181418 | -2.418365 |
| C | -2.049387 | -2.612805 | 2.760204  | C         | -1.786070 | -3.839348 | -1.001577 |
| H | -0.975219 | -1.985037 | 1.006815  | H         | -1.460027 | -4.000055 | 0.032943  |
| C | -2.007353 | -2.769797 | 4.144742  | H         | -1.537513 | -4.739111 | -1.576154 |
| H | -0.820173 | -2.553231 | 5.927954  | H         | -1.217714 | -2.987895 | -1.399488 |
| H | -2.946007 | -2.847571 | 2.187369  | C         | -4.021846 | -4.705641 | -0.335687 |
| H | -2.876983 | -3.147570 | 4.677537  | H         | -3.942915 | -5.624163 | -0.930831 |
| C | 2.937605  | -0.780453 | 2.993262  | H         | -3.575652 | -4.901760 | 0.646320  |
| C | 3.223896  | 0.550042  | 3.303289  | H         | -5.080422 | -4.474278 | -0.187250 |
| C | 3.654970  | -1.803424 | 3.623884  | C         | -3.108300 | -3.824682 | -3.583533 |
| C | 4.210714  | 0.859830  | 4.234679  | H         | -3.202985 | -4.916958 | -3.541456 |
| H | 2.688113  | 1.347320  | 2.785976  | H         | -3.555065 | -3.484078 | -4.524282 |
| C | 4.639294  | -1.493653 | 4.555146  | H         | -2.045470 | -3.565887 | -3.598298 |
| H | 3.437126  | -2.844600 | 3.385613  | C         | -5.332247 | -3.381236 | -2.555264 |
| C | 4.916461  | -0.162242 | 4.861375  | H         | -5.667649 | -2.895902 | -3.478986 |
| H | 4.435549  | 1.900765  | 4.457031  | H         | -5.598947 | -4.442770 | -2.610884 |
| H | 5.193231  | -2.292009 | 5.043410  | H         | -5.871411 | -2.923613 | -1.717382 |
| H | 5.690282  | 0.076716  | 5.587135  | C         | -0.336698 | -0.270918 | -2.288049 |
| C | 2.406880  | 3.168770  | -1.781296 | H         | 0.656445  | -0.204169 | -2.758242 |
| C | 1.113679  | 3.309338  | -2.287254 | H         | -0.844442 | 0.702083  | -2.428889 |
| C | 3.370343  | 4.141673  | -2.068989 | H         | -0.927696 | -1.024074 | -2.836031 |
| C | 0.784205  | 4.405293  | -3.078423 | O         | -0.224894 | -0.599779 | -0.926254 |
| H | 0.357735  | 2.564327  | -2.036006 | H         | -1.235231 | -0.203612 | -0.432592 |
| C | 3.037503  | 5.239733  | -2.853540 | C         | -1.777375 | 1.681894  | 0.401799  |
| H | 4.381122  | 4.038860  | -1.675968 | C         | -2.024243 | 2.837740  | -0.390249 |
| C | 1.745378  | 5.371327  | -3.358760 | C         | -0.757553 | 1.803314  | 1.398869  |
| H | -0.227856 | 4.509950  | -3.463616 | C         | -1.288819 | 3.991533  | -0.236378 |
| H | 3.787259  | 5.996946  | -3.069490 | H         | -2.823981 | 2.812593  | -1.128695 |
| H | 1.487183  | 6.233986  | -3.968453 | C         | -0.009457 | 2.959051  | 1.541086  |
| C | 4.133003  | 2.204902  | 0.294597  | H         | -0.627226 | 0.985578  | 2.110202  |
| C | 3.885244  | 3.274058  | 1.165723  | C         | -0.248490 | 4.070302  | 0.711772  |
| C | 5.377753  | 1.574346  | 0.325657  | H         | -1.500730 | 4.859844  | -0.858057 |
| C | 4.867311  | 3.705070  | 2.048335  | H         | 0.755800  | 3.019257  | 2.314653  |
| H | 2.924218  | 3.790475  | 1.139097  | C         | 0.573882  | 5.222896  | 0.790197  |
| C | 6.357058  | 2.001987  | 1.219765  | N         | 1.269127  | 6.160286  | 0.845320  |
| H | 5.589951  | 0.748315  | -0.351419 |           |           |           |           |
| C | 6.104796  | 3.063978  | 2.080866  | <b>23</b> |           |           |           |
| H | 4.666205  | 4.544015  | 2.710457  | C         | 0.214080  | 0.121685  | -0.074157 |
| H | 7.323716  | 1.504026  | 1.236069  | C         | 0.211713  | 1.256281  | -1.005416 |
| H | 6.873018  | 3.398173  | 2.774238  | C         | -0.527319 | 1.196188  | -2.313447 |
| B | -3.577627 | -1.321952 | -1.153284 | H         | -0.962597 | 2.175495  | -2.547231 |
| O | -3.504075 | -2.354610 | -0.251018 | H         | 0.161462  | 0.936679  | -3.126635 |
| O | -3.602239 | -1.754539 | -2.455839 | H         | -1.343995 | 0.469094  | -2.291300 |
| C | -3.284060 | -3.567670 | -1.009969 | C         | 1.342053  | 2.254533  | -0.927134 |

|   |           |           |           |           |           |           |           |
|---|-----------|-----------|-----------|-----------|-----------|-----------|-----------|
| H | 1.841750  | 2.141715  | 0.045355  | C         | 1.963499  | -3.187156 | -0.761807 |
| H | 2.093219  | 2.029733  | -1.698271 | C         | 2.449784  | -2.294401 | 1.418963  |
| C | 0.856347  | 3.702046  | -1.064428 | C         | 3.306689  | -3.457822 | -0.961784 |
| H | 0.514792  | 3.882674  | -2.092689 | H         | 1.244436  | -3.439724 | -1.539831 |
| H | -0.028074 | 3.825466  | -0.423038 | C         | 3.799916  | -2.557269 | 1.236220  |
| C | 1.916375  | 4.700979  | -0.708813 | H         | 2.109745  | -1.842770 | 2.349575  |
| H | 2.535299  | 5.067138  | -1.531590 | C         | 4.233216  | -3.140999 | 0.041170  |
| C | 2.192216  | 5.147776  | 0.523349  | H         | 3.649662  | -3.915336 | -1.886099 |
| C | 3.288099  | 6.139110  | 0.769186  | H         | 4.521946  | -2.315775 | 2.011764  |
| H | 3.802063  | 6.422558  | -0.155393 | C         | 5.621692  | -3.417270 | -0.156339 |
| H | 2.893839  | 7.053400  | 1.235274  | N         | 6.752440  | -3.642209 | -0.317219 |
| H | 4.035164  | 5.737741  | 1.468421  | H         | -0.526595 | -3.220540 | 0.456833  |
| C | 1.455523  | 4.713266  | 1.754373  |           |           |           |           |
| H | 0.687564  | 3.958129  | 1.559293  | <b>24</b> |           |           |           |
| H | 2.157091  | 4.293090  | 2.488630  | C         | -2.805219 | -0.047298 | 0.158857  |
| H | 0.976673  | 5.571158  | 2.247105  | C         | -2.702080 | 0.600598  | 1.479743  |
| O | -0.615578 | 1.266199  | 0.167346  | C         | -2.626287 | -0.224864 | 2.732305  |
| C | -0.483096 | -1.205630 | -0.322745 | H         | -1.881558 | 0.198728  | 3.420616  |
| C | 0.053978  | -2.300822 | 0.618802  | H         | -3.595579 | -0.227886 | 3.246151  |
| H | 1.068490  | 0.069376  | 0.612326  | H         | -2.328917 | -1.255733 | 2.507576  |
| H | -0.306588 | -1.514665 | -1.365159 | C         | -3.163356 | 2.027585  | 1.636986  |
| H | -0.131903 | -1.999327 | 1.658490  | H         | -3.230748 | 2.484447  | 0.637881  |
| B | -2.032694 | -1.008925 | -0.108920 | H         | -4.181021 | 2.038835  | 2.055308  |
| O | -2.611160 | -1.003499 | 1.129518  | C         | -2.233837 | 2.868096  | 2.507650  |
| O | -2.931215 | -0.853052 | -1.129820 | H         | -2.270266 | 2.509666  | 3.548275  |
| C | -4.044340 | -1.001143 | 0.922111  | H         | -1.195534 | 2.698514  | 2.171332  |
| C | -4.171637 | -0.419816 | -0.518179 | C         | -2.576826 | 4.329682  | 2.441404  |
| C | -4.503800 | -2.447774 | 1.024595  | H         | -3.508241 | 4.576652  | 1.922853  |
| H | -4.199578 | -2.846679 | 1.998240  | C         | -1.866258 | 5.342086  | 2.954346  |
| H | -5.593552 | -2.531370 | 0.944654  | C         | -2.304961 | 6.766346  | 2.804791  |
| H | -4.047923 | -3.069222 | 0.244774  | H         | -3.258997 | 6.849756  | 2.273963  |
| C | -4.696203 | -0.168651 | 2.005147  | H         | -2.411468 | 7.254337  | 3.783640  |
| H | -5.773702 | -0.073259 | 1.822226  | H         | -1.553199 | 7.348764  | 2.251371  |
| H | -4.561855 | -0.657315 | 2.976501  | C         | -0.583312 | 5.155124  | 3.703937  |
| H | -4.260280 | 0.832303  | 2.066417  | H         | -0.245034 | 4.113604  | 3.725155  |
| C | -5.333029 | -0.960328 | -1.323990 | H         | 0.215494  | 5.769309  | 3.260230  |
| H | -6.284916 | -0.723221 | -0.832792 | H         | -0.687082 | 5.495780  | 4.743456  |
| H | -5.341254 | -0.495172 | -2.315794 | O         | -1.549416 | 0.493894  | 0.627746  |
| H | -5.268560 | -2.043934 | -1.457083 | C         | -2.979860 | -1.530996 | -0.079804 |
| C | -4.164150 | 1.101003  | -0.558807 | C         | -3.842362 | -1.737105 | -1.341331 |
| H | -4.044921 | 1.420950  | -1.600494 | C         | -5.228399 | -1.175274 | -1.225340 |
| H | -5.102513 | 1.519959  | -0.178122 | C         | -6.160640 | -1.795555 | -0.381607 |
| H | -3.326609 | 1.511752  | 0.016596  | C         | -5.622240 | -0.024518 | -1.916682 |
| C | 1.513766  | -2.601652 | 0.427766  | C         | -7.440206 | -1.291349 | -0.229432 |

|   |            |           |           |    |           |           |           |
|---|------------|-----------|-----------|----|-----------|-----------|-----------|
| H | -5.867488  | -2.694627 | 0.160195  | C  | 4.117321  | -0.548045 | -3.253735 |
| C | -6.899817  | 0.497992  | -1.774782 | C  | 3.178144  | 0.078421  | -2.435269 |
| H | -4.910515  | 0.465914  | -2.580560 | C  | 3.940833  | -0.427842 | -4.631176 |
| C | -7.816730  | -0.135110 | -0.928262 | C  | 2.064861  | 0.768210  | -2.924052 |
| H | -8.157591  | -1.782492 | 0.423212  | C  | 2.871211  | 0.291788  | -5.156530 |
| H | -7.195759  | 1.392578  | -2.317098 | H  | 4.648316  | -0.898459 | -5.309579 |
| C | -9.135329  | 0.393261  | -0.779256 | C  | 1.935891  | 0.878315  | -4.311923 |
| N | -10.210450 | 0.823857  | -0.657669 | H  | 2.758236  | 0.381726  | -6.233757 |
| H | -3.204310  | 0.597329  | -0.635358 | H  | 1.080372  | 1.403036  | -4.732419 |
| H | -3.571955  | -1.926297 | 0.763634  | P  | 2.103213  | -0.477929 | 1.483208  |
| H | -3.899179  | -2.818000 | -1.521792 | P  | 0.746978  | 1.251981  | -1.739715 |
| H | -3.334292  | -1.295769 | -2.211034 | C  | 6.355375  | -0.207686 | -2.230746 |
| B | -1.638053  | -2.509836 | -0.137523 | H  | 5.951103  | 0.568310  | -1.569735 |
| O | -1.947580  | -3.827754 | -0.686979 | H  | 7.200221  | -0.687046 | -1.720287 |
| O | -1.121960  | -2.783601 | 1.215675  | H  | 6.726583  | 0.277653  | -3.142207 |
| C | -1.975334  | -4.774987 | 0.359716  | C  | 5.915162  | -2.304374 | -3.502310 |
| C | -0.980855  | -4.180066 | 1.405286  | H  | 6.313132  | -1.836553 | -4.409032 |
| C | -3.403829  | -4.877441 | 0.900360  | H  | 6.763045  | -2.789832 | -3.007284 |
| H | -4.075920  | -5.101670 | 0.062361  | H  | 5.194906  | -3.076937 | -3.796182 |
| H | -3.511825  | -5.675048 | 1.646074  | Cu | 0.392258  | -0.259371 | 0.016237  |
| H | -3.731324  | -3.935540 | 1.357462  | C  | 1.924482  | -1.124795 | 3.186709  |
| C | -1.568154  | -6.133864 | -0.186880 | C  | 2.963115  | -1.038727 | 4.122991  |
| H | -1.487405  | -6.877604 | 0.617090  | C  | 0.681308  | -1.623755 | 3.578388  |
| H | -2.323667  | -6.488169 | -0.898745 | C  | 2.757273  | -1.450938 | 5.433259  |
| H | -0.608694  | -6.081183 | -0.711808 | H  | 3.931209  | -0.635462 | 3.826021  |
| C | -1.320191  | -4.535034 | 2.845849  | C  | 0.474144  | -2.018646 | 4.899549  |
| H | -1.412148  | -5.622011 | 2.974300  | H  | -0.111802 | -1.724024 | 2.835765  |
| H | -0.524847  | -4.188912 | 3.516812  | C  | 1.508151  | -1.932823 | 5.825159  |
| H | -2.258300  | -4.063186 | 3.160607  | H  | 3.567008  | -1.383910 | 6.156130  |
| C | 0.470369   | -4.582208 | 1.141004  | H  | -0.503473 | -2.393122 | 5.200238  |
| H | 1.121595   | -3.941814 | 1.751556  | H  | 1.344418  | -2.238752 | 6.855979  |
| H | 0.666055   | -5.627609 | 1.413495  | C  | 2.951956  | 1.115182  | 1.813484  |
| H | 0.750509   | -4.440956 | 0.091995  | C  | 2.147215  | 2.191626  | 2.197005  |
| C | 5.236126   | -3.060300 | -0.725853 | C  | 4.335419  | 1.290120  | 1.736258  |
| C | 4.778626   | -1.868340 | -1.288805 | C  | 2.718405  | 3.417937  | 2.516017  |
| C | 3.846077   | -1.140104 | -0.554959 | H  | 1.062012  | 2.065986  | 2.237888  |
| C | 3.401275   | -1.512463 | 0.716055  | C  | 4.904567  | 2.523471  | 2.040550  |
| C | 3.897484   | -2.700606 | 1.254224  | H  | 4.974129  | 0.459234  | 1.437455  |
| C | 4.795809   | -3.476237 | 0.527672  | C  | 4.098248  | 3.586458  | 2.434971  |
| H | 5.954142   | -3.672476 | -1.266328 | H  | 2.081561  | 4.251212  | 2.805420  |
| H | 3.571123   | -3.022965 | 2.241525  | H  | 5.982697  | 2.650822  | 1.973791  |
| H | 5.168192   | -4.407062 | 0.947612  | H  | 4.543551  | 4.550126  | 2.671638  |
| O | 3.311196   | 0.015317  | -1.071661 | C  | -0.655453 | 1.585114  | -2.870367 |
| C | 5.286573   | -1.260124 | -2.588283 | C  | -0.887512 | 2.829529  | -3.464418 |



|             |           |           |           |   |           |           |           |
|-------------|-----------|-----------|-----------|---|-----------|-----------|-----------|
| C           | -1.479146 | 0.501947  | -3.194425 | H | -1.915395 | 8.400917  | -2.825538 |
| C           | -1.928024 | 2.987041  | -4.375215 | H | -3.010798 | 7.750446  | -1.613438 |
| H           | -0.248268 | 3.676883  | -3.219321 | C | -2.535890 | 5.740009  | -3.481202 |
| C           | -2.507231 | 0.660062  | -4.120156 | H | -2.135261 | 4.830950  | -3.942233 |
| H           | -1.310747 | -0.459748 | -2.704513 | H | -3.523615 | 5.491511  | -3.061741 |
| C           | -2.734781 | 1.901671  | -4.708435 | H | -2.712849 | 6.475001  | -4.277213 |
| H           | -2.103169 | 3.958100  | -4.832625 | O | 0.608719  | 1.515131  | -0.648479 |
| H           | -3.135458 | -0.190148 | -4.382241 | C | 2.923213  | 0.506976  | -0.270027 |
| H           | -3.540657 | 2.024032  | -5.428398 | C | 3.207910  | -0.358383 | -1.501181 |
| C           | 1.173894  | 2.915948  | -1.121122 | C | 4.082462  | -1.541663 | -1.185735 |
| C           | 0.217434  | 3.526568  | -0.299049 | C | 5.232042  | -1.795410 | -1.940021 |
| C           | 2.367695  | 3.580985  | -1.397221 | C | 3.738272  | -2.424969 | -0.151310 |
| C           | 0.439794  | 4.795888  | 0.216817  | C | 6.022334  | -2.906879 | -1.689607 |
| H           | -0.709784 | 2.995808  | -0.070490 | H | 5.510473  | -1.105796 | -2.735280 |
| C           | 2.599953  | 4.844967  | -0.855813 | C | 4.524109  | -3.537437 | 0.111797  |
| H           | 3.115486  | 3.117486  | -2.039609 | H | 2.827588  | -2.229020 | 0.427491  |
| C           | 1.637373  | 5.455403  | -0.058104 | C | 5.668792  | -3.785761 | -0.658322 |
| H           | -0.323828 | 5.257428  | 0.842711  | H | 6.912815  | -3.101222 | -2.282203 |
| H           | 3.535570  | 5.357549  | -1.068633 | H | 4.255419  | -4.225459 | 0.910316  |
| H           | 1.820036  | 6.444994  | 0.356014  | C | 6.476119  | -4.934109 | -0.392179 |
| O           | -0.628361 | -1.813728 | -1.016627 | N | 7.134243  | -5.870349 | -0.176951 |
| C           | 0.354120  | -2.552194 | -1.701437 | H | 2.160993  | 2.409749  | 0.425649  |
| H           | -0.040230 | -3.518845 | -2.039651 | H | 3.683988  | 0.236078  | -2.292699 |
| H           | 0.684966  | -1.976709 | -2.581042 | H | 2.264398  | -0.749605 | -1.910017 |
| H           | 1.243931  | -2.740453 | -1.073630 | C | -3.745275 | -5.089147 | 0.496092  |
|             |           |           |           | C | -3.850867 | -3.807839 | 1.037420  |
| <b>24-b</b> |           |           |           | C | -3.206582 | -2.778201 | 0.356198  |
| C           | 2.011375  | 1.707361  | -0.408284 | C | -2.462294 | -2.969348 | -0.811781 |
| C           | 1.362198  | 2.314614  | -1.583138 | C | -2.397257 | -4.263968 | -1.331455 |
| C           | 1.438174  | 1.760980  | -2.980900 | C | -3.035102 | -5.314705 | -0.679992 |
| H           | 0.571850  | 2.090191  | -3.566690 | H | -4.227562 | -5.927074 | 0.993847  |
| H           | 2.338700  | 2.117081  | -3.495334 | H | -1.823496 | -4.450809 | -2.237814 |
| H           | 1.435534  | 0.669132  | -2.986535 | H | -2.973606 | -6.320366 | -1.088029 |
| C           | 1.040626  | 3.789607  | -1.492478 | O | -3.270171 | -1.495754 | 0.838563  |
| H           | 1.010221  | 4.068985  | -0.428057 | C | -4.668719 | -3.445139 | 2.270249  |
| H           | 1.864296  | 4.363979  | -1.943757 | C | -3.954762 | -2.305038 | 2.985136  |
| C           | -0.281824 | 4.182860  | -2.140236 | C | -3.310194 | -1.346339 | 2.205791  |
| H           | -0.236307 | 4.023787  | -3.227769 | C | -3.954721 | -2.105769 | 4.365161  |
| H           | -1.067470 | 3.501328  | -1.765485 | C | -2.679045 | -0.215983 | 2.734126  |
| C           | -0.656942 | 5.604436  | -1.839336 | C | -3.342024 | -0.989330 | 4.928057  |
| H           | -0.084698 | 6.094607  | -1.045554 | H | -4.441087 | -2.829030 | 5.015303  |
| C           | -1.643279 | 6.302015  | -2.416817 | C | -2.709277 | -0.050519 | 4.120473  |
| C           | -1.976319 | 7.696497  | -1.984452 | H | -3.355502 | -0.853589 | 6.006488  |
| H           | -1.311894 | 8.050955  | -1.189409 | H | -2.213386 | 0.808281  | 4.569514  |

|    |           |           |           |              |           |           |           |
|----|-----------|-----------|-----------|--------------|-----------|-----------|-----------|
| P  | -1.494939 | -1.549064 | -1.451806 | C            | -2.923238 | 1.980089  | 0.845696  |
| P  | -1.698550 | 0.834053  | 1.589904  | C            | -2.527364 | 3.260682  | 0.441472  |
| C  | -6.043404 | -2.928375 | 1.802416  | C            | -4.216298 | 1.547513  | 0.526151  |
| H  | -5.942984 | -2.058702 | 1.142273  | C            | -3.407236 | 4.090735  | -0.248235 |
| H  | -6.576107 | -3.715551 | 1.254084  | H            | -1.520874 | 3.616562  | 0.665236  |
| H  | -6.649506 | -2.632503 | 2.667945  | C            | -5.085680 | 2.371080  | -0.179919 |
| C  | -4.882528 | -4.645577 | 3.184867  | H            | -4.554921 | 0.557503  | 0.824068  |
| H  | -5.498073 | -4.370422 | 4.048087  | C            | -4.686798 | 3.646922  | -0.566891 |
| H  | -5.422567 | -5.440892 | 2.660018  | H            | -3.073295 | 5.082869  | -0.551148 |
| H  | -3.932613 | -5.052894 | 3.550824  | H            | -6.082597 | 2.011325  | -0.425619 |
| Cu | -0.430179 | -0.516822 | 0.247316  | H            | -5.368963 | 4.292702  | -1.116110 |
| C  | -0.409349 | -2.331538 | -2.692415 | O            | 1.039741  | -1.495842 | 1.103245  |
| C  | -0.703535 | -2.435007 | -4.053366 | C            | 0.556349  | -2.517858 | 1.888505  |
| C  | 0.797147  | -2.847304 | -2.199781 | H            | 1.362452  | -3.217122 | 2.202543  |
| C  | 0.202600  | -3.049303 | -4.914377 | H            | 0.074185  | -2.169124 | 2.831945  |
| H  | -1.640388 | -2.034361 | -4.439806 | H            | -0.211063 | -3.150721 | 1.379384  |
| C  | 1.693787  | -3.469799 | -3.062199 | B            | 4.245383  | 0.979528  | 0.431594  |
| H  | 1.033392  | -2.728072 | -1.137007 | O            | 4.296244  | 1.235848  | 1.778075  |
| C  | 1.397203  | -3.567885 | -4.420076 | O            | 5.435892  | 1.207639  | -0.204268 |
| H  | -0.025583 | -3.124536 | -5.975185 | C            | 5.549857  | 1.914479  | 2.020354  |
| H  | 2.635112  | -3.858099 | -2.674109 | C            | 6.423965  | 1.407887  | 0.835774  |
| H  | 2.102103  | -4.044097 | -5.097715 | C            | 5.250607  | 3.405303  | 1.951234  |
| C  | -2.692021 | -0.532817 | -2.383200 | C            | 6.057182  | 1.541505  | 3.396005  |
| C  | -2.381127 | 0.824004  | -2.529743 | C            | 7.465642  | 2.390354  | 0.346397  |
| C  | -3.892872 | -1.023791 | -2.900290 | C            | 7.058330  | 0.049793  | 1.097213  |
| C  | -3.247959 | 1.673069  | -3.207408 | H            | 4.449105  | 3.635606  | 2.663672  |
| H  | -1.459263 | 1.209249  | -2.088606 | H            | 6.127267  | 4.010210  | 2.209872  |
| C  | -4.768729 | -0.167092 | -3.562084 | H            | 4.907190  | 3.697335  | 0.951097  |
| H  | -4.144236 | -2.077600 | -2.780728 | H            | 7.053042  | 1.968805  | 3.567705  |
| C  | -4.445123 | 1.178164  | -3.719673 | H            | 5.381842  | 1.943443  | 4.160215  |
| H  | -2.998754 | 2.727981  | -3.316952 | H            | 6.112455  | 0.457441  | 3.528580  |
| H  | -5.706150 | -0.551814 | -3.957594 | H            | 8.180366  | 2.622374  | 1.145771  |
| H  | -5.133064 | 1.845367  | -4.234190 | H            | 8.024174  | 1.949959  | -0.486791 |
| C  | -0.656214 | 1.866392  | 2.677911  | H            | 7.015032  | 3.324050  | -0.002245 |
| C  | -1.108336 | 2.983541  | 3.389781  | H            | 7.488226  | -0.325029 | 0.161673  |
| C  | 0.691857  | 1.496033  | 2.761456  | H            | 7.860343  | 0.113220  | 1.841286  |
| C  | -0.221132 | 3.725611  | 4.162533  | H            | 6.313751  | -0.679220 | 1.441136  |
| H  | -2.155630 | 3.278901  | 3.332061  | H            | 2.411143  | -0.129841 | 0.473736  |
| C  | 1.578291  | 2.243940  | 3.533458  |              |           |           |           |
| H  | 1.038909  | 0.611759  | 2.216808  | <b>25-ts</b> |           |           |           |
| C  | 1.122885  | 3.360238  | 4.228477  | C            | -2.584576 | -0.383968 | 0.324747  |
| H  | -0.577096 | 4.594553  | 4.711458  | C            | -2.481694 | 0.088525  | 1.711211  |
| H  | 2.628117  | 1.956212  | 3.561842  | C            | -2.884375 | -0.915830 | 2.778724  |
| H  | 1.815589  | 3.951388  | 4.824128  | H            | -2.447393 | -1.896767 | 2.555052  |

|   |           |           |           |   |           |           |           |
|---|-----------|-----------|-----------|---|-----------|-----------|-----------|
| H | -2.497343 | -0.588898 | 3.751038  | H | -3.341462 | -6.042051 | 0.930922  |
| H | -3.975809 | -1.011171 | 2.854513  | H | -3.572783 | -4.283548 | 0.868082  |
| C | -3.084270 | 1.472753  | 1.942527  | H | -3.840533 | -5.264787 | -0.585804 |
| H | -2.841794 | 2.102106  | 1.069939  | C | -1.322551 | -6.252323 | -0.852793 |
| H | -4.183315 | 1.403333  | 1.980116  | H | -1.259162 | -7.091164 | -0.147339 |
| C | -2.548771 | 2.139287  | 3.206528  | H | -2.053302 | -6.517115 | -1.626312 |
| H | -2.948233 | 1.613246  | 4.088780  | H | -0.349336 | -6.128602 | -1.338325 |
| H | -1.458634 | 1.996127  | 3.238774  | C | -1.219650 | -4.982109 | 2.384736  |
| C | -2.905895 | 3.590972  | 3.287223  | H | -1.257709 | -6.078423 | 2.435395  |
| H | -3.883598 | 3.854105  | 2.870156  | H | -0.485349 | -4.636895 | 3.123210  |
| C | -2.185594 | 4.581018  | 3.832866  | H | -2.199217 | -4.585083 | 2.672433  |
| C | -2.691014 | 5.992196  | 3.851062  | C | 0.651421  | -4.899511 | 0.768838  |
| H | -3.688231 | 6.079484  | 3.407206  | H | 1.272128  | -4.322388 | 1.469063  |
| H | -2.736136 | 6.383601  | 4.877123  | H | 0.828152  | -5.967659 | 0.948322  |
| H | -2.011227 | 6.659150  | 3.299520  | H | 0.982287  | -4.661415 | -0.247629 |
| C | -0.843304 | 4.398011  | 4.475002  | C | 5.464414  | -2.495690 | -1.328151 |
| H | -0.413605 | 3.404046  | 4.310280  | C | 4.893864  | -1.262953 | -1.647450 |
| H | -0.129362 | 5.146761  | 4.098948  | C | 3.906267  | -0.787000 | -0.790318 |
| H | -0.907854 | 4.557026  | 5.560443  | C | 3.524486  | -1.428880 | 0.390263  |
| O | -1.098539 | 0.127431  | 1.529765  | C | 4.123809  | -2.655563 | 0.679468  |
| C | -2.827367 | -1.691829 | -0.170333 | C | 5.073206  | -3.191241 | -0.186576 |
| C | -3.513950 | -1.668256 | -1.544361 | H | 6.230713  | -2.920707 | -1.971977 |
| C | -4.892771 | -1.077367 | -1.479114 | H | 3.839312  | -3.196492 | 1.580430  |
| C | -5.122843 | 0.271395  | -1.775020 | H | 5.528296  | -4.152231 | 0.039434  |
| C | -5.971408 | -1.867636 | -1.066079 | O | 3.246240  | 0.383771  | -1.075594 |
| C | -6.392250 | 0.818698  | -1.666458 | C | 5.336604  | -0.350733 | -2.782913 |
| H | -4.292432 | 0.896321  | -2.105858 | C | 4.101756  | 0.370036  | -3.308278 |
| C | -7.246351 | -1.338010 | -0.953747 | C | 3.097067  | 0.703191  | -2.398400 |
| H | -5.797372 | -2.917607 | -0.831268 | C | 3.924683  | 0.776514  | -4.629189 |
| C | -7.461833 | 0.013359  | -1.255778 | C | 1.912867  | 1.350365  | -2.763150 |
| H | -6.566579 | 1.865304  | -1.903171 | C | 2.790868  | 1.486573  | -5.015626 |
| H | -8.081283 | -1.958556 | -0.638304 | H | 4.684297  | 0.546735  | -5.372288 |
| C | -8.773433 | 0.569787  | -1.149465 | C | 1.788192  | 1.761881  | -4.094135 |
| N | -9.841987 | 1.024259  | -1.063829 | H | 2.682492  | 1.811653  | -6.047100 |
| H | -2.406981 | 0.410077  | -0.408994 | H | 0.886047  | 2.281734  | -4.412008 |
| H | -3.401366 | -2.286930 | 0.551120  | P | 2.172517  | -0.637043 | 1.330685  |
| H | -3.561917 | -2.701228 | -1.909345 | P | 0.548822  | 1.482436  | -1.536871 |
| H | -2.890995 | -1.099679 | -2.245221 | C | 6.294642  | 0.701346  | -2.188461 |
| B | -1.360742 | -2.697984 | -0.368155 | H | 5.814942  | 1.271274  | -1.383519 |
| O | -1.698866 | -3.902905 | -1.074358 | H | 7.185198  | 0.209832  | -1.776764 |
| O | -0.908849 | -3.094709 | 0.939406  | H | 6.611986  | 1.406265  | -2.967213 |
| C | -1.761536 | -4.978701 | -0.149717 | C | 6.063514  | -1.112801 | -3.883563 |
| C | -0.808400 | -4.510349 | 0.999370  | H | 6.413064  | -0.427889 | -4.663376 |
| C | -3.210131 | -5.151049 | 0.304892  | H | 6.955471  | -1.608420 | -3.485402 |

|    |           |           |           |           |           |           |           |
|----|-----------|-----------|-----------|-----------|-----------|-----------|-----------|
| H  | 5.420912  | -1.870444 | -4.347284 | H         | 2.465006  | 6.048641  | -0.831892 |
| Cu | 0.301404  | -0.168726 | 0.046044  | H         | 0.889123  | 6.566599  | 1.011948  |
| C  | 2.079729  | -1.553556 | 2.912153  | O         | -0.466684 | -1.830907 | -1.147230 |
| C  | 3.191105  | -1.739074 | 3.744490  | C         | 0.637461  | -2.438413 | -1.778295 |
| C  | 0.819033  | -1.980647 | 3.335180  | H         | 0.329489  | -3.317207 | -2.360149 |
| C  | 3.044177  | -2.363063 | 4.977012  | H         | 1.101488  | -1.706929 | -2.456429 |
| H  | 4.173369  | -1.387545 | 3.428845  | H         | 1.405952  | -2.752527 | -1.051368 |
| C  | 0.674798  | -2.591822 | 4.580030  |           |           |           |           |
| H  | -0.035585 | -1.830850 | 2.677322  | pinBOMe   |           |           |           |
| C  | 1.783190  | -2.787261 | 5.396912  | B         | -1.172187 | -0.379594 | -0.112573 |
| H  | 3.910534  | -2.510042 | 5.617819  | O         | -0.691437 | 0.824761  | 0.342411  |
| H  | -0.312825 | -2.912673 | 4.908876  | O         | -0.188821 | -1.261287 | -0.487051 |
| H  | 1.667946  | -3.264733 | 6.367583  | C         | 0.721689  | 0.830911  | 0.039221  |
| C  | 2.916590  | 0.948020  | 1.892379  | C         | 1.053140  | -0.692950 | -0.019902 |
| C  | 2.023479  | 1.913139  | 2.367242  | C         | 0.884315  | 1.528307  | -1.303017 |
| C  | 4.283289  | 1.233757  | 1.868587  | H         | 0.427017  | 2.521729  | -1.240995 |
| C  | 2.490682  | 3.143780  | 2.816998  | H         | 1.940021  | 1.654656  | -1.568026 |
| H  | 0.952082  | 1.696786  | 2.362142  | H         | 0.387293  | 0.973870  | -2.107491 |
| C  | 4.748049  | 2.469024  | 2.311350  | C         | 1.454282  | 1.599620  | 1.117776  |
| H  | 4.990854  | 0.493117  | 1.495056  | H         | 2.538667  | 1.540812  | 0.962442  |
| C  | 3.853419  | 3.425036  | 2.785618  | H         | 1.165416  | 2.655817  | 1.080403  |
| H  | 1.782172  | 3.892311  | 3.168769  | H         | 1.223003  | 1.218833  | 2.116476  |
| H  | 5.813785  | 2.685653  | 2.284526  | C         | 2.159931  | -1.063725 | -0.983919 |
| H  | 4.219346  | 4.390555  | 3.127586  | H         | 3.096398  | -0.565421 | -0.704213 |
| C  | -0.884384 | 1.743459  | -2.654238 | H         | 2.330856  | -2.145385 | -0.951296 |
| C  | -1.513066 | 2.976545  | -2.839171 | H         | 1.911598  | -0.790352 | -2.013454 |
| C  | -1.341817 | 0.628099  | -3.368100 | C         | 1.331628  | -1.291092 | 1.351174  |
| C  | -2.578415 | 3.094180  | -3.730758 | H         | 1.347556  | -2.382666 | 1.263845  |
| H  | -1.164245 | 3.853022  | -2.295175 | H         | 2.300542  | -0.963494 | 1.744684  |
| C  | -2.392695 | 0.752333  | -4.269899 | H         | 0.552915  | -1.018264 | 2.072908  |
| H  | -0.876140 | -0.344415 | -3.198198 | C         | -3.475423 | 0.240906  | 0.127559  |
| C  | -3.013514 | 1.987180  | -4.452562 | H         | -4.290781 | -0.268629 | 0.649817  |
| H  | -3.060445 | 4.059396  | -3.868191 | H         | -3.877710 | 0.690300  | -0.787800 |
| H  | -2.738201 | -0.120496 | -4.820248 | H         | -3.086694 | 1.039216  | 0.769127  |
| H  | -3.839875 | 2.083027  | -5.152844 | O         | -2.480058 | -0.710338 | -0.192474 |
| C  | 0.755479  | 3.113054  | -0.744750 |           |           |           |           |
| C  | -0.107142 | 3.396271  | 0.320747  | <b>26</b> |           |           |           |
| C  | 1.678695  | 4.073060  | -1.160169 | C         | -3.047189 | -0.489115 | -2.084103 |
| C  | -0.077294 | 4.642360  | 0.933218  | C         | -2.092607 | -1.603429 | -1.714001 |
| H  | -0.790656 | 2.621153  | 0.676620  | C         | -2.333256 | -2.866908 | -2.544700 |
| C  | 1.736515  | 5.306473  | -0.513459 | H         | -2.191410 | -2.648560 | -3.610252 |
| H  | 2.350803  | 3.859155  | -1.990181 | H         | -1.598705 | -3.629802 | -2.257460 |
| C  | 0.852247  | 5.596165  | 0.521315  | H         | -3.337831 | -3.288542 | -2.403695 |
| H  | -0.778382 | 4.853554  | 1.739691  | C         | -2.393124 | -1.896290 | -0.224186 |

|   |            |           |           |    |           |           |           |
|---|------------|-----------|-----------|----|-----------|-----------|-----------|
| H | -2.343274  | -0.936737 | 0.317155  | O  | 2.635727  | 1.729929  | -0.123198 |
| H | -3.435032  | -2.246305 | -0.127660 | C  | 3.782597  | 4.093495  | -1.091192 |
| C | -1.461667  | -2.885683 | 0.462712  | C  | 2.416795  | 4.095454  | -0.416435 |
| H | -1.646469  | -3.904994 | 0.085953  | C  | 1.914187  | 2.883651  | 0.053029  |
| H | -0.418965  | -2.651166 | 0.174027  | C  | 1.652285  | 5.235722  | -0.172173 |
| C | -1.625904  | -2.830935 | 1.955930  | C  | 0.686582  | 2.759120  | 0.709900  |
| H | -2.459882  | -2.217398 | 2.313618  | C  | 0.446707  | 5.157021  | 0.519660  |
| C | -0.861673  | -3.424923 | 2.880831  | H  | 2.002476  | 6.205264  | -0.517958 |
| C | -1.114602  | -3.232598 | 4.344718  | C  | -0.034982 | 3.928589  | 0.958661  |
| H | -2.005352  | -2.620407 | 4.527727  | H  | -0.123952 | 6.061404  | 0.713931  |
| H | -1.244134  | -4.193954 | 4.861379  | H  | -0.986883 | 3.873786  | 1.482849  |
| H | -0.258601  | -2.732270 | 4.823850  | P  | 2.588337  | -1.012659 | -1.011842 |
| C | 0.309199   | -4.296995 | 2.545073  | P  | 0.112276  | 1.063592  | 1.106560  |
| H | 0.443844   | -4.434855 | 1.467093  | C  | 4.863524  | 4.141557  | 0.006397  |
| H | 1.242700   | -3.876221 | 2.951894  | H  | 4.774248  | 3.296556  | 0.699187  |
| H | 0.199177   | -5.290421 | 3.001798  | H  | 5.862442  | 4.109544  | -0.446475 |
| O | -0.786965  | -1.184293 | -1.925434 | H  | 4.771279  | 5.068943  | 0.585566  |
| C | -4.216795  | -0.555970 | -2.719885 | C  | 3.963902  | 5.296531  | -2.009936 |
| C | -5.123796  | 0.623782  | -2.899227 | H  | 3.888309  | 6.231426  | -1.444632 |
| C | -6.388284  | 0.538547  | -2.076944 | H  | 4.960732  | 5.290279  | -2.463374 |
| C | -6.363394  | 0.012097  | -0.780375 | H  | 3.216357  | 5.312561  | -2.811665 |
| C | -7.601514  | 1.010053  | -2.586204 | Cu | 0.358741  | -0.404073 | -0.612884 |
| C | -7.512703  | -0.034145 | -0.007359 | C  | 2.814932  | -2.453345 | -2.112924 |
| H | -5.422928  | -0.365450 | -0.380003 | C  | 4.054148  | -3.081057 | -2.294572 |
| C | -8.761463  | 0.969969  | -1.827806 | C  | 1.679191  | -2.953305 | -2.759134 |
| H | -7.634284  | 1.413746  | -3.596737 | C  | 4.158772  | -4.189843 | -3.125291 |
| C | -8.720471  | 0.445311  | -0.530447 | H  | 4.936344  | -2.704132 | -1.776860 |
| H | -7.487399  | -0.446021 | 0.998702  | C  | 1.793190  | -4.067576 | -3.589783 |
| H | -9.701608  | 1.336877  | -2.231613 | H  | 0.709899  | -2.466557 | -2.597323 |
| C | -9.910998  | 0.395236  | 0.258368  | C  | 3.026220  | -4.683768 | -3.772851 |
| N | -10.880473 | 0.355249  | 0.901697  | H  | 5.122695  | -4.673859 | -3.265308 |
| H | -2.714828  | 0.485566  | -1.707339 | H  | 0.908393  | -4.457615 | -4.089534 |
| H | -4.592537  | -1.515241 | -3.085482 | H  | 3.109082  | -5.555503 | -4.418240 |
| H | -5.401605  | 0.761022  | -3.954082 | C  | 3.626853  | -1.459251 | 0.435821  |
| H | -4.579336  | 1.536380  | -2.606219 | C  | 3.404685  | -2.710473 | 1.024316  |
| C | 4.655854   | 2.610027  | -3.022652 | C  | 4.561737  | -0.596579 | 1.011482  |
| C | 3.930593   | 2.777073  | -1.843954 | C  | 4.112425  | -3.095467 | 2.156111  |
| C | 3.367840   | 1.632937  | -1.281935 | H  | 2.676943  | -3.394108 | 0.584035  |
| C | 3.505740   | 0.352559  | -1.823960 | C  | 5.261412  | -0.979136 | 2.153723  |
| C | 4.244519   | 0.228534  | -3.002536 | H  | 4.752876  | 0.378569  | 0.567014  |
| C | 4.811562   | 1.350942  | -3.596353 | C  | 5.040217  | -2.226685 | 2.727304  |
| H | 5.112830   | 3.471326  | -3.503737 | H  | 3.938872  | -4.076373 | 2.594935  |
| H | 4.362125   | -0.749702 | -3.463797 | H  | 5.986910  | -0.297418 | 2.591784  |
| H | 5.381342   | 1.245180  | -4.515908 | H  | 5.591740  | -2.524075 | 3.616191  |

|              |           |           |           |   |           |           |           |
|--------------|-----------|-----------|-----------|---|-----------|-----------|-----------|
| C            | -1.617924 | 1.283588  | 1.659541  | H | -0.102607 | 5.823069  | 0.869562  |
| C            | -2.073022 | 0.762267  | 2.872613  | H | -1.072122 | 5.966585  | 2.345365  |
| C            | -2.548661 | 1.796366  | 0.745794  | H | 0.483849  | 6.773697  | 2.251044  |
| C            | -3.436281 | 0.742085  | 3.160465  | O | 0.642476  | 1.710290  | -1.882276 |
| H            | -1.362167 | 0.357917  | 3.592664  | C | 4.044529  | 0.947376  | -2.584657 |
| C            | -3.905199 | 1.791053  | 1.041587  | C | 4.928744  | -0.254779 | -2.708003 |
| H            | -2.206660 | 2.191073  | -0.212005 | C | 6.112594  | -0.256856 | -1.770798 |
| C            | -4.353303 | 1.250147  | 2.246233  | C | 6.020840  | 0.302356  | -0.493404 |
| H            | -3.779848 | 0.323762  | 4.104193  | C | 7.303865  | -0.886056 | -2.145080 |
| H            | -4.617532 | 2.192228  | 0.322347  | C | 7.087851  | 0.243555  | 0.389610  |
| H            | -5.417977 | 1.228487  | 2.468502  | H | 5.090483  | 0.781702  | -0.191663 |
| C            | 1.019398  | 0.639537  | 2.635399  | C | 8.378541  | -0.962121 | -1.272589 |
| C            | 1.278610  | -0.707686 | 2.900102  | H | 7.386352  | -1.324026 | -3.138528 |
| C            | 1.423564  | 1.612963  | 3.554242  | C | 8.273831  | -0.392544 | 0.002795  |
| C            | 1.927736  | -1.076373 | 4.075050  | H | 7.009305  | 0.680787  | 1.382038  |
| H            | 0.964828  | -1.472346 | 2.186738  | H | 9.301624  | -1.452814 | -1.570303 |
| C            | 2.082137  | 1.242270  | 4.721482  | C | 9.377138  | -0.460909 | 0.908550  |
| H            | 1.220690  | 2.664876  | 3.355945  | N | 10.274489 | -0.518351 | 1.648048  |
| C            | 2.332793  | -0.102666 | 4.983168  | H | 2.584143  | 0.010874  | -1.413735 |
| H            | 2.137139  | -2.127017 | 4.270430  | H | 4.403547  | 1.867443  | -3.050451 |
| H            | 2.399331  | 2.004219  | 5.429583  | H | 5.292906  | -0.371928 | -3.737786 |
| H            | 2.849545  | -0.391353 | 5.895528  | H | 4.334560  | -1.155071 | -2.485211 |
|              |           |           |           | C | -5.623490 | -2.459937 | -1.622274 |
| <b>27-ts</b> |           |           |           | C | -4.562307 | -2.678611 | -0.745667 |
| C            | 2.901378  | 0.943740  | -1.897932 | C | -3.713739 | -1.601081 | -0.492934 |
| C            | 1.970946  | 2.102186  | -1.642613 | C | -3.893633 | -0.331826 | -1.046514 |
| C            | 2.296579  | 3.306371  | -2.522913 | C | -4.980747 | -0.149580 | -1.905186 |
| H            | 2.270862  | 3.019353  | -3.580794 | C | -5.831521 | -1.209224 | -2.197164 |
| H            | 1.544452  | 4.087645  | -2.371511 | H | -6.307359 | -3.271669 | -1.857944 |
| H            | 3.284748  | 3.729688  | -2.300600 | H | -5.149051 | 0.825330  | -2.358677 |
| C            | 2.105264  | 2.462235  | -0.152383 | H | -6.668126 | -1.059578 | -2.874729 |
| H            | 1.957181  | 1.532246  | 0.425604  | O | -2.646204 | -1.759788 | 0.357336  |
| H            | 3.136440  | 2.793403  | 0.051455  | C | -4.320053 | -3.970246 | 0.023634  |
| C            | 1.107913  | 3.504763  | 0.335183  | C | -2.815203 | -4.140522 | 0.178273  |
| H            | 1.317346  | 4.476106  | -0.135995 | C | -2.042722 | -2.992768 | 0.353926  |
| H            | 0.113057  | 3.202488  | -0.035662 | C | -2.154026 | -5.366867 | 0.223430  |
| C            | 1.109835  | 3.637814  | 1.830610  | C | -0.657064 | -3.017020 | 0.534666  |
| H            | 1.567023  | 2.806397  | 2.377779  | C | -0.782405 | -5.431816 | 0.449605  |
| C            | 0.614247  | 4.649452  | 2.555957  | H | -2.713361 | -6.289604 | 0.090918  |
| C            | 0.695118  | 4.652220  | 4.052695  | C | -0.038465 | -4.267884 | 0.604384  |
| H            | 1.186926  | 3.752584  | 4.440059  | H | -0.288772 | -6.398871 | 0.500780  |
| H            | 1.250503  | 5.528471  | 4.416495  | H | 1.035693  | -4.330768 | 0.763329  |
| H            | -0.305653 | 4.717656  | 4.506443  | P | -2.655641 | 0.969102  | -0.671053 |
| C            | -0.046897 | 5.855668  | 1.961541  | P | 0.224512  | -1.405647 | 0.614918  |

|    |           |           |           |           |           |           |           |
|----|-----------|-----------|-----------|-----------|-----------|-----------|-----------|
| C  | -4.935237 | -3.806812 | 1.427568  | C         | -0.070118 | -1.778918 | 3.408413  |
| H  | -4.504632 | -2.949022 | 1.957718  | C         | -0.413265 | 0.943218  | 3.901025  |
| H  | -6.018596 | -3.652502 | 1.347495  | H         | -0.249062 | 1.197914  | 1.769608  |
| H  | -4.752689 | -4.707486 | 2.026973  | C         | -0.249278 | -1.323930 | 4.709399  |
| C  | -4.963454 | -5.172358 | -0.657618 | H         | 0.067902  | -2.842947 | 3.216992  |
| H  | -4.809667 | -6.081276 | -0.066129 | C         | -0.419856 | 0.037755  | 4.956427  |
| H  | -6.047147 | -5.036687 | -0.738800 | H         | -0.552809 | 2.008228  | 4.079959  |
| H  | -4.556252 | -5.337197 | -1.662200 | H         | -0.256383 | -2.032453 | 5.534333  |
| Cu | -0.509974 | 0.121314  | -0.898296 | H         | -0.560508 | 0.390544  | 5.975504  |
| C  | -3.122144 | 2.293197  | -1.840728 | O         | -0.236536 | -0.148803 | -3.011639 |
| C  | -4.068838 | 3.280697  | -1.553238 | H         | 0.410890  | 0.853906  | -2.631244 |
| C  | -2.525752 | 2.249909  | -3.106444 | C         | 0.522002  | -1.233391 | -3.434937 |
| C  | -4.409353 | 4.222801  | -2.518931 | H         | 1.578435  | -1.171756 | -3.105785 |
| H  | -4.543599 | 3.311980  | -0.573537 | H         | 0.122331  | -2.189104 | -3.046107 |
| C  | -2.878283 | 3.188825  | -4.070829 | H         | 0.542283  | -1.326684 | -4.535710 |
| H  | -1.789991 | 1.473513  | -3.325623 |           |           |           |           |
| C  | -3.814382 | 4.177116  | -3.777361 | <b>28</b> |           |           |           |
| H  | -5.144056 | 4.991401  | -2.290062 | C         | 0.362091  | -1.838313 | -0.502567 |
| H  | -2.414419 | 3.152498  | -5.053935 | C         | 1.662051  | -1.747194 | 0.253679  |
| H  | -4.081398 | 4.914454  | -4.531061 | C         | 1.542752  | -2.198392 | 1.701589  |
| C  | -3.182454 | 1.613790  | 0.962935  | H         | 2.533738  | -2.238022 | 2.163922  |
| C  | -2.541426 | 2.761230  | 1.448295  | H         | 0.913624  | -1.518899 | 2.288996  |
| C  | -4.142772 | 0.987683  | 1.759848  | H         | 1.104722  | -3.202714 | 1.758715  |
| C  | -2.870257 | 3.279658  | 2.694195  | C         | 2.173136  | -0.308146 | 0.138408  |
| H  | -1.778247 | 3.257408  | 0.845581  | H         | 2.206269  | -0.048230 | -0.930452 |
| C  | -4.456370 | 1.498375  | 3.017658  | H         | 1.426260  | 0.357347  | 0.598685  |
| H  | -4.658827 | 0.099198  | 1.398927  | C         | 3.550577  | -0.053511 | 0.749279  |
| C  | -3.826504 | 2.646270  | 3.485403  | H         | 3.511221  | -0.257425 | 1.830453  |
| H  | -2.371246 | 4.178622  | 3.052490  | H         | 4.266300  | -0.767338 | 0.324784  |
| H  | -5.204614 | 0.998840  | 3.628616  | C         | 3.981722  | 1.363027  | 0.540270  |
| H  | -4.077906 | 3.047489  | 4.464306  | H         | 3.311694  | 2.110495  | 0.978083  |
| C  | 1.988729  | -1.908137 | 0.601079  | C         | 5.053626  | 1.819061  | -0.120764 |
| C  | 2.870835  | -1.563406 | 1.628705  | C         | 5.321019  | 3.290147  | -0.234713 |
| C  | 2.486562  | -2.580260 | -0.523652 | H         | 4.557892  | 3.889289  | 0.273115  |
| C  | 4.219923  | -1.897710 | 1.540778  | H         | 6.299630  | 3.546561  | 0.195485  |
| H  | 2.504313  | -1.032496 | 2.505522  | H         | 5.358849  | 3.603858  | -1.287561 |
| C  | 3.830107  | -2.929277 | -0.599678 | C         | 6.078875  | 0.958359  | -0.793877 |
| H  | 1.816275  | -2.836659 | -1.345129 | H         | 5.863171  | -0.111512 | -0.731635 |
| C  | 4.701968  | -2.583490 | 0.430817  | H         | 6.164495  | 1.224651  | -1.856591 |
| H  | 4.897119  | -1.617795 | 2.344816  | H         | 7.072584  | 1.128527  | -0.356123 |
| H  | 4.200382  | -3.464690 | -1.471926 | O         | 2.629532  | -2.553438 | -0.424359 |
| H  | 5.757562  | -2.839880 | 0.361219  | C         | -0.855945 | -2.045753 | -0.003839 |
| C  | -0.060990 | -0.872794 | 2.342014  | H         | -0.998300 | -2.175095 | 1.071166  |
| C  | -0.238425 | 0.487268  | 2.597246  | C         | -2.101818 | -2.072011 | -0.835802 |

|   |           |           |           |   |          |           |           |
|---|-----------|-----------|-----------|---|----------|-----------|-----------|
| C | -3.031906 | -0.926996 | -0.517403 | C | 3.225469 | 1.908772  | -0.389265 |
| C | -2.552853 | 0.387508  | -0.529161 | H | 3.004267 | 2.782446  | 0.233240  |
| C | -4.376613 | -1.152723 | -0.217551 | H | 4.268180 | 1.977771  | -0.719800 |
| C | -3.394274 | 1.453831  | -0.259678 | H | 2.576261 | 1.948186  | -1.271313 |
| H | -1.501282 | 0.567033  | -0.749669 | C | 3.904338 | 0.624793  | 1.628984  |
| C | -5.233181 | -0.096841 | 0.058590  | H | 4.947083 | 0.500684  | 1.310810  |
| H | -4.757102 | -2.172325 | -0.201836 | H | 3.827940 | 1.574542  | 2.169609  |
| C | -4.742709 | 1.213135  | 0.036825  | H | 3.651129 | -0.182408 | 2.321857  |
| H | -3.019882 | 2.474109  | -0.273335 | C | 3.904848 | -0.624712 | -1.628811 |
| H | -6.278998 | -0.278057 | 0.292557  | H | 4.947487 | -0.500557 | -1.310308 |
| C | -5.617483 | 2.307315  | 0.321207  | H | 3.828660 | -1.574461 | -2.169462 |
| N | -6.329912 | 3.198219  | 0.552973  | H | 3.651819 | 0.182483  | -2.321759 |
| H | 0.477483  | -1.697282 | -1.582437 | C | 3.225428 | -1.908731 | 0.389217  |
| H | -1.825844 | -2.027345 | -1.899668 | H | 3.004434 | -2.782403 | -0.233366 |
| H | 2.312528  | -3.464023 | -0.398933 | H | 4.268047 | -1.977706 | 0.720050  |
| H | -2.640306 | -3.018655 | -0.690607 | H | 2.575970 | -1.948191 | 1.271080  |

B<sub>2</sub>pin<sub>2</sub>

29

|   |           |           |           |   |          |           |           |
|---|-----------|-----------|-----------|---|----------|-----------|-----------|
| B | -0.850110 | -0.000042 | -0.000311 | C | 3.305610 | 1.871296  | 3.667239  |
| O | -1.610527 | -0.710520 | 0.892152  | C | 3.454474 | 0.923418  | 2.657093  |
| O | -1.610850 | 0.710441  | -0.892488 | C | 2.654801 | 1.066165  | 1.523244  |
| C | -2.982405 | -0.648756 | 0.428473  | C | 1.744528 | 2.111400  | 1.345747  |
| C | -2.982546 | 0.648726  | -0.428265 | C | 1.629885 | 3.044336  | 2.380677  |
| C | -3.225554 | -1.908636 | -0.389690 | C | 2.400014 | 2.920139  | 3.531919  |
| H | -3.004317 | -2.782511 | 0.232523  | H | 3.896487 | 1.793353  | 4.576328  |
| H | -4.268291 | -1.977520 | -0.720166 | H | 0.916791 | 3.860702  | 2.291826  |
| H | -2.576413 | -1.947785 | -1.271800 | H | 2.294232 | 3.648661  | 4.331532  |
| C | -3.904288 | -0.625261 | 1.628987  | O | 2.723374 | 0.117941  | 0.529506  |
| H | -4.947044 | -0.501040 | 1.310896  | C | 4.427636 | -0.248060 | 2.685330  |
| H | -3.827879 | -1.575172 | 2.169324  | C | 3.705404 | -1.434117 | 2.060779  |
| H | -3.651035 | 0.181732  | 2.322088  | C | 2.897598 | -1.179750 | 0.955765  |
| C | -3.904911 | 0.625264  | -1.628407 | C | 3.802647 | -2.757684 | 2.488577  |
| H | -4.947540 | 0.501089  | -1.309879 | C | 2.211849 | -2.174176 | 0.253545  |
| H | -3.828687 | 1.575170  | -2.168780 | C | 3.124770 | -3.774433 | 1.821104  |
| H | -3.651980 | -0.181744 | -2.321609 | H | 4.411345 | -3.004022 | 3.355177  |
| C | -3.225326 | 1.908629  | 0.389976  | C | 2.339393 | -3.488769 | 0.707913  |
| H | -3.004291 | 2.782480  | -0.232341 | H | 3.212336 | -4.800094 | 2.170095  |
| H | -4.267932 | 1.977571  | 0.720853  | H | 1.809655 | -4.289570 | 0.195638  |
| H | -2.575848 | 1.947782  | 1.271837  | P | 0.653913 | 2.076256  | -0.128832 |
| B | 0.850108  | -0.000045 | -0.000360 | P | 1.102223 | -1.627803 | -1.096294 |
| O | 1.610541  | 0.710200  | 0.892279  | C | 5.642126 | 0.104819  | 1.805037  |
| O | 1.610831  | -0.710219 | -0.892792 | H | 5.345347 | 0.327508  | 0.772818  |
| C | 2.982400  | 0.648628  | 0.428517  | H | 6.157181 | 0.984108  | 2.211418  |
| C | 2.982551  | -0.648587 | -0.428622 | H | 6.347946 | -0.734815 | 1.784300  |



|    |           |           |           |   |           |           |           |
|----|-----------|-----------|-----------|---|-----------|-----------|-----------|
| C  | 4.912041  | -0.555269 | 4.095687  | H | 4.039783  | -2.045789 | -1.597655 |
| H  | 5.622052  | -1.389437 | 4.085172  | C | 3.911752  | -0.340713 | -4.534580 |
| H  | 5.443909  | 0.303930  | 4.518609  | H | 2.145307  | 0.575011  | -5.363320 |
| H  | 4.079502  | -0.813662 | 4.761885  | H | 5.497346  | -1.330346 | -3.464428 |
| Cu | -0.310314 | 0.042303  | -0.417853 | H | 4.553610  | -0.027797 | -5.354995 |
| C  | -0.517535 | 3.451995  | 0.118127  | O | -2.212028 | -0.127812 | -1.232557 |
| C  | -0.141279 | 4.801043  | 0.107856  | C | -2.442126 | 0.533273  | -2.446591 |
| C  | -1.860064 | 3.108421  | 0.295248  | H | -2.609778 | 1.613756  | -2.296507 |
| C  | -1.098874 | 5.790384  | 0.295134  | H | -1.568231 | 0.405385  | -3.103066 |
| H  | 0.902226  | 5.073745  | -0.051407 | H | -3.318437 | 0.110506  | -2.957819 |
| C  | -2.816709 | 4.103640  | 0.478684  | B | -2.642672 | -1.026038 | 1.116055  |
| H  | -2.178842 | 2.064768  | 0.268871  | O | -3.159828 | -1.744073 | 2.174523  |
| C  | -2.437189 | 5.441496  | 0.483098  | O | -1.340996 | -0.601275 | 1.441654  |
| H  | -0.804816 | 6.837415  | 0.290265  | C | -2.115223 | -1.950847 | 3.148284  |
| H  | -3.857650 | 3.814382  | 0.612758  | C | -1.159798 | -0.763587 | 2.868408  |
| H  | -3.183442 | 6.220139  | 0.624969  | C | -2.724249 | -1.958904 | 4.534323  |
| C  | 1.716225  | 2.648745  | -1.510008 | H | -3.380543 | -2.829261 | 4.645177  |
| C  | 1.078105  | 3.038658  | -2.693920 | H | -1.940988 | -2.026357 | 5.300145  |
| C  | 3.111100  | 2.646279  | -1.457657 | H | -3.318459 | -1.059336 | 4.720116  |
| C  | 1.822233  | 3.428262  | -3.799980 | C | -1.477883 | -3.300537 | 2.843502  |
| H  | -0.010947 | 3.044615  | -2.747554 | H | -0.728524 | -3.575695 | 3.595240  |
| C  | 3.854921  | 3.028162  | -2.571399 | H | -2.259786 | -4.067622 | 2.841078  |
| H  | 3.625488  | 2.352036  | -0.543846 | H | -0.996279 | -3.300365 | 1.856584  |
| C  | 3.214192  | 3.418586  | -3.742342 | C | -1.605291 | 0.545494  | 3.504665  |
| H  | 1.314404  | 3.736180  | -4.711325 | H | -1.455578 | 0.542932  | 4.590608  |
| H  | 4.941284  | 3.019457  | -2.520119 | H | -1.005167 | 1.359913  | 3.077178  |
| H  | 3.798183  | 3.715615  | -4.610505 | H | -2.661301 | 0.752267  | 3.290490  |
| C  | 0.339472  | -3.161717 | -1.728590 | C | 0.294272  | -1.026792 | 3.179576  |
| C  | 1.067936  | -4.165659 | -2.377252 | H | 0.883965  | -0.126381 | 2.967706  |
| C  | -1.042140 | -3.305083 | -1.564585 | H | 0.423151  | -1.268644 | 4.243102  |
| C  | 0.424048  | -5.309025 | -2.834278 | H | 0.698370  | -1.849188 | 2.580602  |
| H  | 2.141614  | -4.047341 | -2.524565 | B | -3.387897 | -0.399938 | -0.323966 |
| C  | -1.683900 | -4.452516 | -2.024666 | O | -4.400295 | -1.154844 | -1.054403 |
| H  | -1.615346 | -2.500001 | -1.102152 | O | -4.076542 | 0.844552  | 0.098375  |
| C  | -0.951717 | -5.453541 | -2.654296 | C | -5.673403 | -0.685914 | -0.663201 |
| H  | 0.992478  | -6.088457 | -3.336339 | C | -5.421570 | 0.826192  | -0.339648 |
| H  | -2.759099 | -4.553996 | -1.897157 | C | -6.659835 | -0.923893 | -1.795197 |
| H  | -1.453253 | -6.348177 | -3.016276 | H | -6.796835 | -2.001999 | -1.944506 |
| C  | 2.264259  | -1.138355 | -2.425060 | H | -7.642033 | -0.489113 | -1.565990 |
| C  | 1.743281  | -0.390967 | -3.485784 | H | -6.300372 | -0.497580 | -2.737924 |
| C  | 3.621086  | -1.470952 | -2.423309 | C | -6.132433 | -1.475556 | 0.563707  |
| C  | 2.560320  | -0.004178 | -4.541557 | H | -7.151725 | -1.209736 | 0.872051  |
| H  | 0.689727  | -0.105836 | -3.475626 | H | -6.119456 | -2.542963 | 0.311195  |
| C  | 4.441509  | -1.069447 | -3.473959 | H | -5.454583 | -1.325976 | 1.411341  |

|              |           |           |           |   |           |           |           |
|--------------|-----------|-----------|-----------|---|-----------|-----------|-----------|
| C            | -5.563434 | 1.734356  | -1.561920 | C | 0.002821  | -5.185873 | -3.112137 |
| H            | -6.612724 | 1.874980  | -1.853075 | H | -1.780287 | -4.029215 | -2.777248 |
| H            | -5.144245 | 2.718639  | -1.312367 | C | 2.041871  | -4.280345 | -2.195792 |
| H            | -5.012906 | 1.349845  | -2.426072 | H | 1.853853  | -2.406135 | -1.142673 |
| C            | -6.309823 | 1.381318  | 0.765738  | C | 1.377511  | -5.278248 | -2.902435 |
| H            | -6.084018 | 2.444421  | 0.921298  | H | -0.519072 | -5.965023 | -3.663281 |
| H            | -7.374116 | 1.300711  | 0.505393  | H | 3.115786  | -4.346332 | -2.033744 |
| H            | -6.141888 | 0.860363  | 1.713673  | H | 1.929933  | -6.129678 | -3.293954 |
|              |           |           |           | C | -2.345750 | -1.436172 | -2.294931 |
| <b>30-ts</b> |           |           |           | C | -2.078865 | -1.124174 | -3.634681 |
| C            | -2.539582 | -3.216708 | 2.870328  | C | -3.673747 | -1.508632 | -1.869422 |
| C            | -2.610556 | -1.857526 | 2.563175  | C | -3.117608 | -0.912759 | -4.532058 |
| C            | -2.174187 | -1.472716 | 1.296716  | H | -1.044509 | -1.058213 | -3.977937 |
| C            | -1.650809 | -2.360430 | 0.354959  | C | -4.714455 | -1.277690 | -2.766242 |
| C            | -1.604564 | -3.711603 | 0.698815  | H | -3.903073 | -1.753990 | -0.832960 |
| C            | -2.053018 | -4.135755 | 1.945273  | C | -4.440290 | -0.985161 | -4.097546 |
| H            | -2.874668 | -3.570897 | 3.842339  | H | -2.895935 | -0.683078 | -5.572219 |
| H            | -1.192378 | -4.431500 | -0.005444 | H | -5.744439 | -1.336597 | -2.421326 |
| H            | -2.012620 | -5.190884 | 2.204265  | H | -5.254076 | -0.812239 | -4.798129 |
| O            | -2.248466 | -0.155350 | 0.916593  | C | -0.015838 | 3.704428  | -0.237103 |
| C            | -3.199615 | -0.793025 | 3.481218  | C | -0.657696 | 4.905783  | -0.549382 |
| C            | -2.478032 | 0.519845  | 3.204780  | C | 1.336546  | 3.714662  | 0.122346  |
| C            | -2.059418 | 0.779666  | 1.902118  | C | 0.047175  | 6.105005  | -0.502769 |
| C            | -2.251259 | 1.520009  | 4.151802  | H | -1.710463 | 4.904960  | -0.828706 |
| C            | -1.433077 | 1.964668  | 1.511150  | C | 2.034367  | 4.916674  | 0.173843  |
| C            | -1.642555 | 2.719839  | 3.796282  | H | 1.842853  | 2.772980  | 0.338875  |
| H            | -2.555524 | 1.366731  | 5.184447  | C | 1.391616  | 6.111786  | -0.139946 |
| C            | -1.236014 | 2.944649  | 2.484042  | H | -0.455802 | 7.037335  | -0.749678 |
| H            | -1.482981 | 3.486691  | 4.550120  | H | 3.086329  | 4.919273  | 0.452335  |
| H            | -0.751666 | 3.881636  | 2.215295  | H | 1.940087  | 7.050520  | -0.106187 |
| P            | -0.910835 | -1.652950 | -1.169274 | C | -2.409380 | 2.386711  | -1.152268 |
| P            | -0.857605 | 2.079771  | -0.228068 | C | -2.404177 | 2.133791  | -2.526580 |
| C            | -4.686013 | -0.613039 | 3.117824  | C | -3.575272 | 2.870141  | -0.550858 |
| H            | -4.808806 | -0.328241 | 2.065869  | C | -3.539129 | 2.377306  | -3.292696 |
| H            | -5.231574 | -1.550579 | 3.284385  | H | -1.506630 | 1.727279  | -2.994988 |
| H            | -5.136296 | 0.170309  | 3.740564  | C | -4.714445 | 3.101500  | -1.315882 |
| C            | -3.093453 | -1.193553 | 4.948857  | H | -3.590391 | 3.070213  | 0.520083  |
| H            | -3.540065 | -0.429526 | 5.593881  | C | -4.695984 | 2.859790  | -2.687027 |
| H            | -3.643955 | -2.120155 | 5.142601  | H | -3.524447 | 2.171813  | -4.360646 |
| H            | -2.049032 | -1.339766 | 5.253460  | H | -5.618378 | 3.475471  | -0.840265 |
| Cu           | 0.432478  | 0.201010  | -0.590324 | H | -5.586991 | 3.042836  | -3.283222 |
| C            | -0.042688 | -3.090950 | -1.901529 | O | 1.894376  | 0.194822  | -2.260939 |
| C            | -0.704938 | -4.097014 | -2.614671 | C | 1.753135  | 1.304273  | -3.124793 |
| C            | 1.337634  | -3.187969 | -1.697221 | H | 2.688871  | 1.512923  | -3.664332 |

|   |          |           |           |              |           |           |           |
|---|----------|-----------|-----------|--------------|-----------|-----------|-----------|
| H | 0.973025 | 1.063687  | -3.856750 |              |           |           |           |
| H | 1.466140 | 2.215660  | -2.581500 | <b>31-ts</b> |           |           |           |
| B | 1.681025 | -0.431868 | 0.916611  | C            | 0.272475  | 5.437640  | 1.303516  |
| O | 2.259157 | 0.216992  | 1.998337  | C            | 0.074206  | 4.696946  | 0.138248  |
| O | 1.457041 | -1.767192 | 1.234239  | C            | -0.518925 | 3.442113  | 0.274666  |
| C | 2.230821 | -0.666510 | 3.137658  | C            | -0.921102 | 2.913613  | 1.503970  |
| C | 2.111739 | -2.070801 | 2.477632  | C            | -0.729818 | 3.699118  | 2.643857  |
| C | 3.485219 | -0.453653 | 3.961863  | C            | -0.130570 | 4.949580  | 2.543902  |
| H | 3.497524 | 0.569671  | 4.355130  | H            | 0.737588  | 6.418900  | 1.246652  |
| H | 3.512177 | -1.144724 | 4.814728  | H            | -1.032281 | 3.313654  | 3.615839  |
| H | 4.395843 | -0.599010 | 3.371533  | H            | 0.023729  | 5.550252  | 3.436662  |
| C | 1.006923 | -0.284527 | 3.960313  | O            | -0.749250 | 2.662996  | -0.829631 |
| H | 0.946562 | -0.861225 | 4.891939  | C            | 0.373274  | 5.199502  | -1.266839 |
| H | 1.068310 | 0.779342  | 4.218692  | C            | 0.764293  | 3.999779  | -2.118404 |
| H | 0.077851 | -0.436450 | 3.394371  | C            | 0.152120  | 2.773904  | -1.861168 |
| C | 3.453116 | -2.696312 | 2.120359  | C            | 1.668191  | 4.052731  | -3.178405 |
| H | 4.015174 | -3.006472 | 3.009691  | C            | 0.417294  | 1.612872  | -2.589213 |
| H | 3.266751 | -3.583755 | 1.502895  | C            | 1.933065  | 2.925133  | -3.949231 |
| H | 4.063006 | -2.005140 | 1.527247  | H            | 2.172416  | 4.986918  | -3.413548 |
| C | 1.268696 | -3.068473 | 3.247970  | C            | 1.311467  | 1.716013  | -3.656501 |
| H | 1.225467 | -4.014550 | 2.694848  | H            | 2.629960  | 2.989140  | -4.781278 |
| H | 1.706577 | -3.270219 | 4.234748  | H            | 1.543196  | 0.832982  | -4.248639 |
| H | 0.238527 | -2.719471 | 3.380705  | P            | -1.501701 | 1.177183  | 1.535371  |
| B | 2.767904 | 0.305622  | -1.131728 | P            | -0.315116 | 0.030178  | -1.993765 |
| O | 3.389792 | 1.553596  | -0.960891 | C            | -0.922941 | 5.803209  | -1.841571 |
| O | 3.691351 | -0.734432 | -0.861712 | H            | -1.736364 | 5.068271  | -1.851419 |
| C | 4.768192 | 1.339743  | -0.642304 | H            | -1.242230 | 6.660602  | -1.235363 |
| C | 4.987802 | -0.151298 | -1.059603 | H            | -0.756404 | 6.144650  | -2.871107 |
| C | 5.597896 | 2.337029  | -1.433125 | C            | 1.456487  | 6.273686  | -1.265805 |
| H | 5.406065 | 3.350404  | -1.060695 | H            | 1.630489  | 6.652427  | -2.278624 |
| H | 6.670793 | 2.134632  | -1.318350 | H            | 1.148840  | 7.135814  | -0.664452 |
| H | 5.347274 | 2.318386  | -2.498414 | H            | 2.406246  | 5.892537  | -0.868710 |
| C | 4.965508 | 1.589703  | 0.844576  | Cu           | -0.108791 | -0.503373 | 0.415465  |
| H | 6.025167 | 1.553976  | 1.126541  | C            | -1.561812 | 0.828123  | 3.333449  |
| H | 4.584812 | 2.591964  | 1.078944  | C            | -2.724327 | 0.897547  | 4.104903  |
| H | 4.396933 | 0.873267  | 1.442669  | C            | -0.356570 | 0.460995  | 3.947374  |
| C | 5.333166 | -0.305116 | -2.538145 | C            | -2.688591 | 0.587769  | 5.462108  |
| H | 6.331651 | 0.083540  | -2.771144 | H            | -3.666308 | 1.189412  | 3.644151  |
| H | 5.308016 | -1.369820 | -2.796462 | C            | -0.320883 | 0.168393  | 5.306542  |
| H | 4.602217 | 0.210083  | -3.172970 | H            | 0.553712  | 0.393382  | 3.347478  |
| C | 6.010318 | -0.896173 | -0.225676 | C            | -1.488378 | 0.222029  | 6.064622  |
| H | 6.053197 | -1.944084 | -0.546001 | H            | -3.601753 | 0.637612  | 6.051065  |
| H | 7.009002 | -0.459808 | -0.356934 | H            | 0.620388  | -0.114583 | 5.773293  |
| H | 5.764409 | -0.875420 | 0.840609  | H            | -1.462311 | -0.020296 | 7.124581  |

|   |           |           |           |   |           |           |           |
|---|-----------|-----------|-----------|---|-----------|-----------|-----------|
| C | -3.261133 | 1.258453  | 1.045665  | H | 3.614945  | 3.271219  | -1.018396 |
| C | -3.996498 | 0.066134  | 1.126007  | H | 2.853031  | 3.713790  | 0.517009  |
| C | -3.873190 | 2.396045  | 0.514689  | C | 4.814539  | 0.868141  | 2.477213  |
| C | -5.320852 | 0.021654  | 0.708633  | H | 5.534770  | 1.695716  | 2.433322  |
| H | -3.507198 | -0.832423 | 1.504277  | H | 4.685349  | 0.589294  | 3.529577  |
| C | -5.196472 | 2.344684  | 0.082377  | H | 5.238937  | 0.011863  | 1.944686  |
| H | -3.320138 | 3.332080  | 0.443347  | C | 2.865836  | 2.386475  | 2.752541  |
| C | -5.924530 | 1.163049  | 0.182970  | H | 2.719640  | 2.000211  | 3.768724  |
| H | -5.880265 | -0.910251 | 0.784640  | H | 3.511822  | 3.270587  | 2.814851  |
| H | -5.662768 | 3.238373  | -0.326623 | H | 1.886017  | 2.693875  | 2.364114  |
| H | -6.959470 | 1.130313  | -0.149723 | C | -0.080818 | -3.157436 | 0.410249  |
| C | 0.697860  | -1.192853 | -2.912656 | C | -1.267249 | -3.105860 | 1.281485  |
| C | 0.160885  | -2.139893 | -3.786248 | C | -1.018902 | -2.859721 | 2.756290  |
| C | 2.072035  | -1.225856 | -2.633012 | H | -1.943828 | -2.516060 | 3.236203  |
| C | 0.984252  | -3.098640 | -4.377123 | H | -0.683317 | -3.772597 | 3.264619  |
| H | -0.904509 | -2.128721 | -4.012761 | H | -0.275120 | -2.068956 | 2.901416  |
| C | 2.895197  | -2.155965 | -3.253164 | C | -2.267221 | -4.224864 | 1.017315  |
| H | 2.488511  | -0.510847 | -1.921192 | H | -2.368219 | -4.330585 | -0.073398 |
| C | 2.351858  | -3.102358 | -4.122073 | H | -1.871581 | -5.178745 | 1.398621  |
| H | 0.553953  | -3.834420 | -5.053078 | C | -3.652732 | -3.952958 | 1.606867  |
| H | 3.962925  | -2.156549 | -3.037687 | H | -3.608786 | -4.005303 | 2.703043  |
| H | 2.994345  | -3.840942 | -4.596744 | H | -3.935641 | -2.919840 | 1.358778  |
| C | -1.941791 | 0.000723  | -2.840324 | C | -4.682129 | -4.918845 | 1.102708  |
| C | -3.008982 | -0.574955 | -2.144120 | H | -4.800557 | -5.841359 | 1.676765  |
| C | -2.159976 | 0.538428  | -4.113974 | C | -5.426511 | -4.776321 | -0.001501 |
| C | -4.279323 | -0.609273 | -2.715189 | C | -6.408040 | -5.826087 | -0.425057 |
| H | -2.832822 | -0.991537 | -1.149921 | H | -6.432724 | -6.671473 | 0.270574  |
| C | -3.428144 | 0.499675  | -4.681864 | H | -7.423403 | -5.410693 | -0.495667 |
| H | -1.332705 | 0.992322  | -4.659404 | H | -6.165823 | -6.212135 | -1.425303 |
| C | -4.489082 | -0.072386 | -3.981193 | C | -5.354202 | -3.587837 | -0.911779 |
| H | -5.108449 | -1.044295 | -2.159616 | H | -4.609016 | -2.846874 | -0.601690 |
| H | -3.592200 | 0.920409  | -5.671596 | H | -5.101969 | -3.899728 | -1.935517 |
| H | -5.482178 | -0.094535 | -4.424669 | H | -6.331435 | -3.085929 | -0.978158 |
| B | 1.723514  | 0.264133  | 0.825953  | O | -1.595672 | -1.946152 | 0.567129  |
| O | 2.217191  | 1.210377  | -0.061007 | C | 1.278745  | -2.910385 | 0.729291  |
| O | 2.565956  | 0.169319  | 1.930966  | H | 1.531474  | -2.589498 | 1.737205  |
| C | 3.516001  | 1.644808  | 0.379880  | C | 2.252372  | -3.338785 | -0.138232 |
| C | 3.482960  | 1.290699  | 1.893530  | H | 1.938827  | -3.720480 | -1.112034 |
| C | 4.543184  | 0.847095  | -0.415460 | C | 3.664009  | -3.328725 | 0.117753  |
| H | 4.364817  | 1.024807  | -1.483929 | C | 4.531116  | -3.984282 | -0.783988 |
| H | 5.570933  | 1.153956  | -0.186219 | C | 4.235137  | -2.678062 | 1.234905  |
| H | 4.448734  | -0.232289 | -0.228824 | C | 5.895104  | -4.015029 | -0.578745 |
| C | 3.661126  | 3.122627  | 0.068906  | H | 4.103182  | -4.477394 | -1.655603 |
| H | 4.624376  | 3.507583  | 0.429502  | C | 5.600146  | -2.709820 | 1.447787  |

|           |           |           |           |   |            |           |           |
|-----------|-----------|-----------|-----------|---|------------|-----------|-----------|
| H         | 3.605111  | -2.110338 | 1.917861  | H | -5.090005  | 0.630702  | 1.926378  |
| C         | 6.444043  | -3.380000 | 0.547574  | C | -7.850277  | 0.842574  | -0.034867 |
| H         | 6.548962  | -4.528238 | -1.279127 | H | -7.913985  | 1.713028  | -2.008015 |
| H         | 6.031681  | -2.211254 | 2.313281  | H | -7.476493  | 0.044794  | 1.934761  |
| C         | 7.851041  | -3.409003 | 0.772081  | C | -9.228801  | 0.477542  | -0.034036 |
| N         | 9.001677  | -3.432559 | 0.955510  | N | -10.354554 | 0.177909  | -0.032999 |
| H         | -0.286794 | -3.520570 | -0.598855 | H | -1.133062  | 2.155399  | -0.357490 |
|           |           |           |           | P | 1.030367   | -1.517209 | 1.807825  |
| <b>32</b> |           |           |           | C | 0.230569   | -1.891438 | 3.406545  |
| Cu        | -0.009979 | 0.325417  | 0.909356  | C | -1.156059  | -1.730783 | 3.502325  |
| C         | -1.358156 | 1.791460  | 0.651093  | C | 0.949205   | -2.363276 | 4.509676  |
| C         | -0.510450 | 2.559970  | 1.711457  | C | -1.814072  | -2.042541 | 4.688245  |
| C         | -1.229238 | 2.646835  | 3.053864  | H | -1.720911  | -1.369576 | 2.641801  |
| H         | -0.559476 | 3.097924  | 3.795606  | C | 0.287594   | -2.668325 | 5.694487  |
| H         | -2.152525 | 3.241714  | 3.008187  | H | 2.028428   | -2.493305 | 4.439727  |
| H         | -1.476181 | 1.638332  | 3.412952  | C | -1.093361  | -2.507749 | 5.784505  |
| C         | -0.246359 | 3.956846  | 1.127919  | H | -2.892004  | -1.916457 | 4.757211  |
| H         | 0.236055  | 3.817956  | 0.144500  | H | 0.851520   | -3.032092 | 6.550056  |
| H         | -1.212718 | 4.456811  | 0.933875  | H | -1.607728  | -2.744728 | 6.712888  |
| C         | 0.649823  | 4.860995  | 1.974167  | C | 2.760508   | -1.151821 | 2.249446  |
| H         | 0.167811  | 5.066248  | 2.940938  | C | 2.987479   | 0.020230  | 2.982520  |
| H         | 1.574808  | 4.313180  | 2.199610  | C | 3.834094   | -1.970470 | 1.895561  |
| C         | 0.927428  | 6.160666  | 1.283040  | C | 4.275710   | 0.340584  | 3.390924  |
| H         | 0.140937  | 6.916388  | 1.373516  | H | 2.150514   | 0.688241  | 3.193019  |
| C         | 1.991662  | 6.472953  | 0.531565  | C | 5.126135   | -1.627933 | 2.286024  |
| C         | 2.112531  | 7.812143  | -0.130867 | H | 3.664686   | -2.879066 | 1.317098  |
| H         | 1.253664  | 8.457365  | 0.084547  | C | 5.345829   | -0.481534 | 3.043723  |
| H         | 3.023098  | 8.334374  | 0.195087  | H | 4.449675   | 1.248114  | 3.965417  |
| H         | 2.196019  | 7.707326  | -1.223284 | H | 5.961022   | -2.265906 | 2.006302  |
| C         | 3.140584  | 5.547960  | 0.273486  | H | 6.355504   | -0.222759 | 3.355473  |
| H         | 3.011842  | 4.560886  | 0.729571  | C | 1.066812   | -3.138663 | 0.964547  |
| H         | 3.273736  | 5.394343  | -0.807871 | C | 1.462065   | -3.184990 | -0.376374 |
| H         | 4.084626  | 5.975866  | 0.639519  | C | 0.635888   | -4.325103 | 1.562810  |
| O         | 0.688355  | 1.843712  | 1.873025  | C | 1.421552   | -4.348649 | -1.144810 |
| C         | -2.787496 | 1.612083  | 0.840291  | C | 0.580663   | -5.500332 | 0.823108  |
| H         | -3.112582 | 1.206253  | 1.800789  | H | 0.320765   | -4.321467 | 2.604898  |
| C         | -3.711597 | 1.869642  | -0.110402 | C | 0.960311   | -5.506609 | -0.516347 |
| H         | -3.369653 | 2.299993  | -1.056690 | H | 0.236641   | -6.419271 | 1.290805  |
| C         | -5.125460 | 1.546881  | -0.035916 | H | 0.909060   | -6.437956 | -1.074641 |
| C         | -5.952167 | 1.833127  | -1.137721 | C | 1.968839   | -4.302437 | -2.565575 |
| C         | -5.705300 | 0.894143  | 1.069145  | C | 1.714607   | -2.910373 | -3.128312 |
| C         | -7.292085 | 1.488401  | -1.145802 | C | 1.738854   | -1.822708 | -2.260991 |
| H         | -5.518425 | 2.329499  | -2.005093 | C | 1.517811   | -2.634142 | -4.482461 |
| C         | -7.042901 | 0.551351  | 1.076093  | C | 1.573786   | -0.498263 | -2.669565 |

|   |           |           |           |              |           |           |           |
|---|-----------|-----------|-----------|--------------|-----------|-----------|-----------|
| C | 1.361829  | -1.326204 | -4.932304 | C            | -3.147141 | -0.718362 | -2.639300 |
| H | 1.490128  | -3.449221 | -5.201749 | C            | -1.854335 | -2.836462 | -2.751463 |
| C | 1.392934  | -0.263824 | -4.032427 | H            | -2.909057 | -3.721825 | 0.975384  |
| H | 1.219565  | -1.134449 | -5.992416 | H            | -2.870357 | -4.366649 | -0.680452 |
| H | 1.261986  | 0.756351  | -4.388883 | H            | -1.432705 | -3.571071 | 0.007421  |
| C | 3.492691  | -4.525389 | -2.494962 | H            | -4.904525 | -2.886268 | -1.315264 |
| H | 3.711281  | -5.516100 | -2.074522 | H            | -4.931859 | -2.484228 | 0.411842  |
| H | 3.929317  | -4.467053 | -3.500061 | H            | -4.933065 | -1.183406 | -0.790912 |
| H | 3.981994  | -3.772078 | -1.866486 | H            | -2.522817 | -0.328922 | -3.453199 |
| C | 1.355087  | -5.387303 | -3.445585 | H            | -4.036612 | -1.181587 | -3.081902 |
| H | 1.566927  | -6.383834 | -3.045038 | H            | -3.466719 | 0.124286  | -2.011807 |
| H | 0.267916  | -5.271151 | -3.535370 | H            | -2.706495 | -3.420143 | -3.124400 |
| H | 1.790513  | -5.361725 | -4.450228 | H            | -1.325802 | -2.404711 | -3.610086 |
| O | 1.914331  | -2.012627 | -0.910758 | H            | -1.161124 | -3.510829 | -2.238061 |
| P | 1.494836  | 0.761932  | -1.338098 |              |           |           |           |
| C | 3.256343  | 1.134881  | -1.008336 | <b>33-ts</b> |           |           |           |
| C | 3.529412  | 1.863952  | 0.156890  | C            | 1.011862  | -5.536240 | -0.293753 |
| C | 4.307769  | 0.758392  | -1.848784 | C            | 1.525801  | -4.409634 | -0.935623 |
| C | 4.840477  | 2.221967  | 0.460164  | C            | 1.529579  | -3.214854 | -0.215472 |
| H | 2.700925  | 2.138974  | 0.818574  | C            | 1.047688  | -3.104550 | 1.092305  |
| C | 5.617775  | 1.101235  | -1.527889 | C            | 0.563433  | -4.261135 | 1.708184  |
| H | 4.100987  | 0.195910  | -2.758374 | C            | 0.544876  | -5.467195 | 1.016391  |
| C | 5.884600  | 1.836603  | -0.376027 | H            | 0.984401  | -6.489180 | -0.816571 |
| H | 5.047072  | 2.793930  | 1.363460  | H            | 0.176143  | -4.208681 | 2.723724  |
| H | 6.432089  | 0.799194  | -2.183101 | H            | 0.159006  | -6.361298 | 1.499042  |
| H | 6.909377  | 2.108296  | -0.129742 | O            | 2.030303  | -2.073329 | -0.781049 |
| C | 0.926939  | 2.255421  | -2.242726 | C            | 2.162030  | -4.410386 | -2.319475 |
| C | -0.397629 | 2.267723  | -2.706402 | C            | 1.877200  | -3.058992 | -2.961056 |
| C | 1.690681  | 3.419067  | -2.358624 | C            | 1.865079  | -1.934023 | -2.140323 |
| C | -0.940751 | 3.416164  | -3.268647 | C            | 1.692730  | -2.847321 | -4.327701 |
| H | -1.007158 | 1.366823  | -2.609206 | C            | 1.682291  | -0.631985 | -2.607696 |
| C | 1.141525  | 4.572940  | -2.913771 | C            | 1.522569  | -1.562004 | -4.834624 |
| H | 2.720726  | 3.429184  | -2.002154 | H            | 1.690108  | -3.692810 | -5.011303 |
| C | -0.173214 | 4.575569  | -3.367258 | C            | 1.522929  | -0.461042 | -3.982975 |
| H | -1.969838 | 3.409724  | -3.623496 | H            | 1.394330  | -1.417808 | -5.904602 |
| H | 1.749553  | 5.472061  | -2.997033 | H            | 1.381245  | 0.538989  | -4.387981 |
| H | -0.600857 | 5.478817  | -3.795345 | P            | 0.965208  | -1.441094 | 1.847643  |
| B | -1.411474 | -0.672215 | -0.048847 | P            | 1.556787  | 0.686751  | -1.339897 |
| O | -2.559282 | -1.223610 | 0.449723  | C            | 3.686993  | -4.545184 | -2.137298 |
| O | -1.164021 | -1.011403 | -1.349266 | H            | 4.089924  | -3.736997 | -1.515324 |
| C | -3.022510 | -2.198356 | -0.524670 | H            | 3.926487  | -5.501317 | -1.654952 |
| C | -2.329940 | -1.722144 | -1.843655 | H            | 4.188283  | -4.508835 | -3.112599 |
| C | -2.527034 | -3.548481 | -0.037783 | C            | 1.666605  | -5.567672 | -3.178761 |
| C | -4.535486 | -2.177514 | -0.562730 | H            | 2.158737  | -5.558486 | -4.157215 |

|    |           |           |           |   |           |           |           |
|----|-----------|-----------|-----------|---|-----------|-----------|-----------|
| H  | 1.914781  | -6.529653 | -2.717748 | H | 5.028501  | 2.857457  | 1.367600  |
| H  | 0.581834  | -5.526571 | -3.336525 | H | 6.509066  | 0.716289  | -2.052976 |
| Cu | 0.035401  | 0.371214  | 0.751650  | H | 6.930325  | 2.120172  | -0.050244 |
| C  | 0.089917  | -1.723581 | 3.427071  | B | -1.412609 | -0.627526 | -0.191208 |
| C  | 0.751064  | -2.188036 | 4.568983  | O | -1.225926 | -0.917051 | -1.511806 |
| C  | -1.284328 | -1.468522 | 3.481459  | O | -2.507034 | -1.237339 | 0.353276  |
| C  | 0.045782  | -2.391311 | 5.750285  | C | -2.364891 | -1.698698 | -1.958905 |
| H  | 1.821156  | -2.388939 | 4.531889  | C | -2.974716 | -2.217175 | -0.613919 |
| C  | -1.986641 | -1.675849 | 4.665467  | C | -3.271735 | -0.747414 | -2.721011 |
| H  | -1.805013 | -1.116389 | 2.591273  | H | -2.711501 | -0.327430 | -3.565127 |
| C  | -1.322205 | -2.132723 | 5.799776  | H | -4.153479 | -1.261559 | -3.120033 |
| H  | 0.565798  | -2.749837 | 6.635451  | H | -3.605777 | 0.079630  | -2.082804 |
| H  | -3.054512 | -1.472953 | 4.702261  | C | -1.853759 | -2.781207 | -2.886750 |
| H  | -1.869923 | -2.286922 | 6.726509  | H | -2.677611 | -3.424147 | -3.221252 |
| C  | 2.672983  | -1.055359 | 2.362200  | H | -1.396819 | -2.315263 | -3.768268 |
| C  | 2.865804  | 0.169020  | 3.014487  | H | -1.090511 | -3.402571 | -2.406022 |
| C  | 3.759517  | -1.898843 | 2.126355  | C | -4.487392 | -2.260458 | -0.581910 |
| C  | 4.133582  | 0.520491  | 3.460843  | H | -4.860272 | -2.979280 | -1.322890 |
| H  | 2.023304  | 0.855544  | 3.116317  | H | -4.824477 | -2.590025 | 0.407721  |
| C  | 5.031958  | -1.525447 | 2.551715  | H | -4.936694 | -1.282990 | -0.784092 |
| H  | 3.615063  | -2.850366 | 1.615824  | C | -2.399631 | -3.549421 | -0.164376 |
| C  | 5.217131  | -0.324286 | 3.229341  | H | -2.712233 | -3.739020 | 0.869818  |
| H  | 4.281864  | 1.470801  | 3.969554  | H | -2.747436 | -4.379670 | -0.789882 |
| H  | 5.877969  | -2.182084 | 2.362383  | H | -1.304529 | -3.528155 | -0.181602 |
| H  | 6.211042  | -0.039951 | 3.567835  | C | -1.398019 | 1.850427  | 0.497173  |
| C  | 0.984833  | 2.143211  | -2.298531 | C | -0.546004 | 2.616709  | 1.553673  |
| C  | 1.702394  | 3.339741  | -2.363832 | C | -1.241969 | 2.662734  | 2.910989  |
| C  | -0.308457 | 2.098767  | -2.841005 | H | -0.572058 | 3.129414  | 3.642117  |
| C  | 1.137225  | 4.470568  | -2.950596 | H | -2.186272 | 3.225728  | 2.893235  |
| H  | 2.704621  | 3.397399  | -1.941054 | H | -1.442208 | 1.640508  | 3.262215  |
| C  | -0.865617 | 3.224100  | -3.435537 | C | -0.329808 | 4.028486  | 0.985474  |
| H  | -0.879461 | 1.171657  | -2.775098 | H | 0.155574  | 3.909859  | 0.001113  |
| C  | -0.145719 | 4.417050  | -3.484840 | H | -1.308990 | 4.504888  | 0.800472  |
| H  | 1.705783  | 5.398613  | -2.986031 | C | 0.545702  | 4.942019  | 1.842808  |
| H  | -1.869081 | 3.172255  | -3.853975 | H | 0.038157  | 5.160059  | 2.793899  |
| H  | -0.586105 | 5.302163  | -3.937912 | H | 1.461585  | 4.393238  | 2.098773  |
| C  | 3.304583  | 1.086942  | -0.971093 | C | 0.850565  | 6.232275  | 1.145615  |
| C  | 3.546175  | 1.867209  | 0.166895  | H | 0.075136  | 7.001192  | 1.214270  |
| C  | 4.377773  | 0.678293  | -1.768009 | C | 1.934343  | 6.519555  | 0.412213  |
| C  | 4.847391  | 2.247082  | 0.484065  | C | 2.094910  | 7.850855  | -0.257342 |
| H  | 2.699011  | 2.167180  | 0.793919  | H | 1.247101  | 8.515819  | -0.060654 |
| C  | 5.677967  | 1.042780  | -1.431504 | H | 3.011251  | 8.355869  | 0.081059  |
| H  | 4.196495  | 0.074022  | -2.656112 | H | 2.195113  | 7.737084  | -1.346726 |
| C  | 5.913681  | 1.831471  | -0.308175 | C | 3.071491  | 5.569930  | 0.191628  |

|           |            |           |           |    |           |           |           |
|-----------|------------|-----------|-----------|----|-----------|-----------|-----------|
| H         | 2.889514   | 4.575572  | 0.611499  | P  | 0.438837  | -0.136153 | -1.885239 |
| H         | 3.263498   | 5.443716  | -0.884628 | C  | 5.375596  | -3.159829 | -1.910573 |
| H         | 4.005217   | 5.960628  | 0.622116  | H  | 5.258433  | -2.088710 | -2.111945 |
| O         | 0.676157   | 1.942530  | 1.690238  | H  | 6.326876  | -3.309695 | -1.384833 |
| C         | -2.815959  | 1.631221  | 0.707215  | H  | 5.421439  | -3.683644 | -2.873613 |
| H         | -3.115739  | 1.239517  | 1.681299  | C  | 4.419017  | -5.198212 | -0.838230 |
| C         | -3.762230  | 1.843744  | -0.233333 | H  | 4.471439  | -5.735130 | -1.791081 |
| H         | -3.448474  | 2.266597  | -1.192904 | H  | 5.370254  | -5.379551 | -0.326573 |
| C         | -5.164782  | 1.485569  | -0.122369 | H  | 3.610653  | -5.632838 | -0.236472 |
| C         | -6.027559  | 1.750518  | -1.201460 | Cu | 0.485130  | 0.445050  | 0.325038  |
| C         | -5.699572  | 0.820332  | 0.999011  | C  | 2.733755  | 1.479894  | 2.894174  |
| C         | -7.358614  | 1.374814  | -1.173354 | C  | 3.944997  | 1.890196  | 3.468110  |
| H         | -5.629084  | 2.254922  | -2.080521 | C  | 1.539285  | 1.633674  | 3.606484  |
| C         | -7.028321  | 0.447084  | 1.041947  | C  | 3.963721  | 2.433485  | 4.746291  |
| H         | -5.056142  | 0.568929  | 1.839172  | H  | 4.874658  | 1.785139  | 2.908629  |
| C         | -7.871993  | 0.718450  | -0.046649 | C  | 1.567667  | 2.183453  | 4.888151  |
| H         | -8.009235  | 1.583204  | -2.018852 | H  | 0.592209  | 1.335254  | 3.141699  |
| H         | -7.426178  | -0.069180 | 1.912034  | C  | 2.772542  | 2.579717  | 5.457508  |
| C         | -9.241395  | 0.322031  | -0.006905 | H  | 4.906258  | 2.748410  | 5.188350  |
| N         | -10.359393 | -0.003698 | 0.027134  | H  | 0.637414  | 2.306120  | 5.439672  |
| H         | -1.186069  | 2.206805  | -0.517560 | H  | 2.788733  | 3.009264  | 6.456831  |
|           |            |           |           | C  | 3.810660  | 1.836083  | 0.281554  |
| <b>34</b> |            |           |           | C  | 3.592792  | 3.217915  | 0.340465  |
| C         | 4.699682   | -3.388213 | 1.452651  | C  | 4.845447  | 1.348994  | -0.519095 |
| C         | 4.163227   | -2.938642 | 0.247469  | C  | 4.391738  | 4.093262  | -0.384281 |
| C         | 3.572207   | -1.675836 | 0.245885  | H  | 2.798783  | 3.613716  | 0.974561  |
| C         | 3.538909   | -0.836411 | 1.362135  | C  | 5.643073  | 2.227274  | -1.248753 |
| C         | 4.092210   | -1.323531 | 2.549279  | H  | 5.040607  | 0.279371  | -0.571653 |
| C         | 4.657238   | -2.593035 | 2.594690  | C  | 5.418718  | 3.598526  | -1.185313 |
| H         | 5.156234   | -4.373398 | 1.508094  | H  | 4.210764  | 5.164764  | -0.323705 |
| H         | 4.065655   | -0.710190 | 3.446997  | H  | 6.448115  | 1.834527  | -1.865716 |
| H         | 5.075834   | -2.964354 | 3.526593  | H  | 6.044337  | 4.280993  | -1.755805 |
| O         | 2.959469   | -1.212063 | -0.894620 | C  | -1.180228 | -0.140844 | -2.752595 |
| C         | 4.208546   | -3.706279 | -1.066686 | C  | -1.521422 | 0.866173  | -3.660203 |
| C         | 2.906872   | -3.425895 | -1.804054 | C  | -2.140652 | -1.105702 | -2.415272 |
| C         | 2.340964   | -2.157891 | -1.677442 | C  | -2.792279 | 0.901578  | -4.229304 |
| C         | 2.247579   | -4.341776 | -2.622579 | H  | -0.792186 | 1.628696  | -3.928090 |
| C         | 1.142456   | -1.784653 | -2.291759 | C  | -3.400742 | -1.079715 | -3.002403 |
| C         | 1.079536   | -3.989105 | -3.291319 | H  | -1.900799 | -1.870612 | -1.676222 |
| H         | 2.651406   | -5.343308 | -2.748346 | C  | -3.730346 | -0.074164 | -3.909507 |
| C         | 0.531096   | -2.722068 | -3.128010 | H  | -3.043805 | 1.691738  | -4.932824 |
| H         | 0.590283   | -4.709237 | -3.942004 | H  | -4.135303 | -1.837171 | -2.735398 |
| H         | -0.391544  | -2.464547 | -3.642905 | H  | -4.717718 | -0.051316 | -4.365318 |
| P         | 2.646545   | 0.760703  | 1.213489  | C  | 1.449413  | 1.001452  | -2.900788 |



|   |           |           |           |              |            |           |           |
|---|-----------|-----------|-----------|--------------|------------|-----------|-----------|
| C | 1.650264  | 2.298226  | -2.424327 | H            | -2.900383  | 5.193760  | 0.409799  |
| C | 1.993364  | 0.629568  | -4.133793 | C            | -0.922753  | 5.392949  | -0.205495 |
| C | 2.380248  | 3.217183  | -3.172042 | C            | -1.209263  | 6.588253  | -1.062952 |
| H | 1.235794  | 2.585451  | -1.456044 | H            | -2.261884  | 6.886686  | -1.012913 |
| C | 2.733519  | 1.544581  | -4.874532 | H            | -0.596302  | 7.448862  | -0.758008 |
| H | 1.834406  | -0.378414 | -4.516020 | H            | -0.958538  | 6.391882  | -2.115143 |
| C | 2.925861  | 2.838621  | -4.394609 | C            | 0.509467   | 4.953001  | -0.205827 |
| H | 2.542724  | 4.222151  | -2.786153 | H            | 0.653033   | 3.978869  | 0.277613  |
| H | 3.159226  | 1.248668  | -5.830529 | H            | 0.886044   | 4.878018  | -1.236678 |
| H | 3.506403  | 3.551826  | -4.975232 | H            | 1.153761   | 5.685329  | 0.303924  |
| B | -1.955861 | -1.389835 | 1.370073  | O            | -0.755483  | 0.765036  | 1.762786  |
| O | -1.018307 | -2.080000 | 0.625459  | C            | -4.236424  | -0.265672 | 0.969707  |
| O | -2.166329 | -1.964103 | 2.601929  | H            | -4.619529  | -0.614254 | 1.933925  |
| C | -0.674197 | -3.268481 | 1.373823  | C            | -5.103126  | 0.011858  | -0.018925 |
| C | -1.060074 | -2.864715 | 2.825282  | H            | -4.694981  | 0.324572  | -0.984805 |
| C | -1.526332 | -4.396949 | 0.812286  | C            | -6.555007  | -0.105103 | 0.038996  |
| H | -1.347350 | -4.460946 | -0.268022 | C            | -7.287456  | -0.050425 | -1.158209 |
| H | -1.268036 | -5.363517 | 1.260261  | C            | -7.264490  | -0.270038 | 1.241605  |
| H | -2.594592 | -4.210386 | 0.972242  | C            | -8.665734  | -0.172501 | -1.167859 |
| C | 0.792574  | -3.576492 | 1.173411  | H            | -6.750607  | 0.084693  | -2.096179 |
| H | 1.108835  | -4.413096 | 1.811249  | C            | -8.640907  | -0.393281 | 1.246823  |
| H | 0.969729  | -3.862942 | 0.128874  | H            | -6.726586  | -0.288702 | 2.186704  |
| H | 1.424198  | -2.710383 | 1.400767  | C            | -9.354236  | -0.347918 | 0.039335  |
| C | -1.519619 | -4.009610 | 3.701568  | H            | -9.218842  | -0.133826 | -2.102875 |
| H | -0.718752 | -4.750748 | 3.817104  | H            | -9.178391  | -0.518101 | 2.183533  |
| H | -1.775006 | -3.631932 | 4.697880  | C            | -10.775698 | -0.474344 | 0.042628  |
| H | -2.401883 | -4.508962 | 3.290443  | N            | -11.935732 | -0.579269 | 0.045542  |
| C | 0.028551  | -2.060843 | 3.525048  | H            | -2.514625  | -0.001682 | -0.222045 |
| H | -0.382740 | -1.649851 | 4.455176  |              |            |           |           |
| H | 0.894949  | -2.684755 | 3.775786  | <b>35-ts</b> |            |           |           |
| H | 0.346821  | -1.214869 | 2.902890  | C            | 5.028224   | 0.098793  | -3.974895 |
| C | -2.762576 | -0.147628 | 0.839229  | C            | 4.864860   | 0.620567  | -2.692704 |
| C | -2.099492 | 1.060044  | 1.604849  | C            | 4.030218   | -0.080871 | -1.823045 |
| C | -2.723875 | 1.224103  | 2.993074  | C            | 3.351668   | -1.248787 | -2.182211 |
| H | -2.129453 | 1.939001  | 3.575662  | C            | 3.566249   | -1.753307 | -3.467286 |
| H | -3.760253 | 1.588411  | 2.948191  | C            | 4.397261   | -1.081972 | -4.356116 |
| H | -2.712141 | 0.267236  | 3.527677  | H            | 5.665212   | 0.612297  | -4.690647 |
| C | -2.304626 | 2.330750  | 0.765364  | H            | 3.058841   | -2.663002 | -3.779945 |
| H | -1.789754 | 2.170312  | -0.200138 | H            | 4.551530   | -1.478546 | -5.356261 |
| H | -3.375817 | 2.463258  | 0.536074  | O            | 3.836991   | 0.373116  | -0.544134 |
| C | -1.752962 | 3.604130  | 1.402972  | C            | 5.588275   | 1.850879  | -2.160697 |
| H | -2.297614 | 3.810464  | 2.336694  | C            | 4.669332   | 2.536506  | -1.158429 |
| H | -0.707571 | 3.421730  | 1.691378  | C            | 3.860906   | 1.735328  | -0.357309 |
| C | -1.886306 | 4.792576  | 0.504982  | C            | 4.637871   | 3.910064  | -0.914369 |

|    |           |           |           |   |           |           |           |
|----|-----------|-----------|-----------|---|-----------|-----------|-----------|
| C  | 3.053182  | 2.229634  | 0.668244  | C | -1.046318 | 3.282709  | 3.073262  |
| C  | 3.843607  | 4.439963  | 0.097870  | H | -0.678061 | 2.063683  | 1.333667  |
| H  | 5.247261  | 4.580650  | -1.515183 | C | -0.546024 | 3.751871  | 4.284039  |
| C  | 3.059090  | 3.606667  | 0.889886  | H | 1.128565  | 3.759203  | 5.642046  |
| H  | 3.838733  | 5.512816  | 0.272747  | H | -2.044812 | 3.551334  | 2.734649  |
| H  | 2.436166  | 4.027527  | 1.676700  | H | -1.155929 | 4.397098  | 4.912827  |
| P  | 2.091373  | -1.914963 | -1.027767 | C | 3.163797  | 0.176030  | 2.667248  |
| P  | 1.987178  | 1.030172  | 1.552006  | C | 2.687261  | -0.945056 | 3.352256  |
| C  | 6.844246  | 1.376495  | -1.403212 | C | 4.481980  | 0.590631  | 2.873441  |
| H  | 6.583323  | 0.704012  | -0.576595 | C | 3.505507  | -1.633814 | 4.238803  |
| H  | 7.517289  | 0.839448  | -2.083443 | H | 1.664201  | -1.280336 | 3.181800  |
| H  | 7.381071  | 2.238278  | -0.986838 | C | 5.305933  | -0.107745 | 3.752777  |
| C  | 6.014409  | 2.790293  | -3.283235 | H | 4.867371  | 1.465426  | 2.350837  |
| H  | 6.551405  | 3.656234  | -2.882120 | C | 4.819482  | -1.216839 | 4.438207  |
| H  | 6.707924  | 2.289491  | -3.967110 | H | 3.120052  | -2.507388 | 4.761693  |
| H  | 5.154511  | 3.150123  | -3.860329 | H | 6.331308  | 0.221333  | 3.906111  |
| Cu | 0.931257  | -0.169383 | -0.114151 | H | 5.465982  | -1.760411 | 5.123392  |
| C  | 1.206846  | -3.147883 | -2.054307 | B | -3.373830 | 2.154966  | -0.369312 |
| C  | 1.297875  | -4.529275 | -1.880413 | O | -2.809111 | 3.121218  | 0.416434  |
| C  | 0.337865  | -2.639944 | -3.027219 | O | -3.736822 | 2.617352  | -1.607396 |
| C  | 0.517133  | -5.385302 | -2.654801 | C | -2.936105 | 4.381079  | -0.279305 |
| H  | 1.971535  | -4.942754 | -1.132754 | C | -3.144947 | 3.930848  | -1.759937 |
| C  | -0.427781 | -3.493865 | -3.810063 | C | -4.146761 | 5.085669  | 0.313698  |
| H  | 0.263892  | -1.560486 | -3.165863 | H | -4.003903 | 5.183944  | 1.395886  |
| C  | -0.346533 | -4.871948 | -3.616288 | H | -4.275829 | 6.089625  | -0.106647 |
| H  | 0.589178  | -6.460014 | -2.505046 | H | -5.067192 | 4.514738  | 0.143720  |
| H  | -1.100377 | -3.082901 | -4.559661 | C | -1.681152 | 5.193808  | -0.034247 |
| H  | -0.956166 | -5.543444 | -4.216117 | H | -1.683374 | 6.106927  | -0.642812 |
| C  | 3.022281  | -2.903219 | 0.198224  | H | -1.630838 | 5.488294  | 1.020708  |
| C  | 2.290463  | -3.674859 | 1.110658  | H | -0.781321 | 4.613528  | -0.264722 |
| C  | 4.413594  | -2.857500 | 0.305888  | C | -4.086208 | 4.801348  | -2.565390 |
| C  | 2.944517  | -4.407723 | 2.093290  | H | -3.703347 | 5.827966  | -2.623352 |
| H  | 1.201051  | -3.722303 | 1.042842  | H | -4.160390 | 4.412113  | -3.586900 |
| C  | 5.063267  | -3.575627 | 1.306903  | H | -5.092916 | 4.826624  | -2.138440 |
| H  | 4.998741  | -2.264530 | -0.395652 | C | -1.839601 | 3.730973  | -2.510484 |
| C  | 4.332680  | -4.355538 | 2.196791  | H | -2.056918 | 3.216917  | -3.455111 |
| H  | 2.365350  | -5.013100 | 2.788669  | H | -1.359404 | 4.687887  | -2.747050 |
| H  | 6.146906  | -3.527821 | 1.385465  | H | -1.137969 | 3.110766  | -1.936896 |
| H  | 4.843358  | -4.917066 | 2.975800  | C | -3.627970 | 0.682479  | 0.129893  |
| C  | 1.016099  | 2.087261  | 2.681178  | C | -2.499301 | -0.274878 | -0.396308 |
| C  | 1.517127  | 2.564318  | 3.897575  | C | -2.614543 | -0.489143 | -1.902420 |
| C  | -0.271370 | 2.448401  | 2.271101  | H | -1.755740 | -1.069405 | -2.261316 |
| C  | 0.736192  | 3.392399  | 4.696071  | H | -3.526916 | -1.036719 | -2.171937 |
| H  | 2.521772  | 2.289675  | 4.217979  | H | -2.624031 | 0.474637  | -2.429050 |

|           |            |           |           |   |           |           |           |
|-----------|------------|-----------|-----------|---|-----------|-----------|-----------|
| C         | -2.629374  | -1.600278 | 0.365924  | O | 0.461857  | -2.713234 | -1.198256 |
| H         | -2.597547  | -1.366217 | 1.442109  | O | 1.602159  | -2.516586 | 0.772901  |
| H         | -3.625023  | -2.029902 | 0.176919  | C | 0.676431  | -4.063029 | -0.716806 |
| C         | -1.552168  | -2.638793 | 0.064067  | C | 1.837930  | -3.870223 | 0.301197  |
| H         | -1.606711  | -2.956791 | -0.987221 | C | -0.623947 | -4.505696 | -0.063789 |
| H         | -0.571178  | -2.149343 | 0.175120  | H | -1.433159 | -4.418362 | -0.796510 |
| C         | -1.638146  | -3.844824 | 0.952211  | H | -0.572016 | -5.548603 | 0.268443  |
| H         | -2.123340  | -4.730220 | 0.533396  | H | -0.877771 | -3.876785 | 0.798162  |
| C         | -1.214812  | -3.917412 | 2.222450  | C | 1.003043  | -4.958229 | -1.892028 |
| C         | -1.376284  | -5.164578 | 3.036411  | H | 1.249480  | -5.970079 | -1.547300 |
| H         | -1.872211  | -5.962136 | 2.473217  | H | 0.131844  | -5.029743 | -2.551976 |
| H         | -0.401907  | -5.542224 | 3.379037  | H | 1.842807  | -4.573077 | -2.477169 |
| H         | -1.964042  | -4.969830 | 3.944753  | C | 1.815446  | -4.814273 | 1.482943  |
| C         | -0.564766  | -2.777560 | 2.947158  | H | 1.900432  | -5.853794 | 1.143139  |
| H         | -0.379316  | -1.907884 | 2.302968  | H | 2.665371  | -4.603727 | 2.140977  |
| H         | -1.190323  | -2.444513 | 3.787613  | H | 0.897116  | -4.712234 | 2.067826  |
| H         | 0.394287   | -3.097789 | 3.384994  | C | 3.213475  | -3.866650 | -0.347982 |
| O         | -1.272960  | 0.327216  | -0.079791 | H | 3.952923  | -3.535030 | 0.389963  |
| C         | -5.012710  | 0.251658  | -0.210740 | H | 3.500500  | -4.867498 | -0.688919 |
| H         | -5.275278  | 0.279574  | -1.272220 | H | 3.254804  | -3.180860 | -1.202906 |
| C         | -5.933723  | -0.131522 | 0.687116  | C | 0.659262  | -0.312313 | -0.264369 |
| H         | -5.648120  | -0.140437 | 1.742624  | C | 1.707383  | 0.479358  | 0.565879  |
| C         | -7.307614  | -0.538928 | 0.410695  | C | 1.421936  | 0.399067  | 2.061327  |
| C         | -8.151334  | -0.850513 | 1.488754  | H | 2.275015  | 0.791984  | 2.624228  |
| C         | -7.832485  | -0.638395 | -0.889579 | H | 0.534089  | 0.982833  | 2.333971  |
| C         | -9.464478  | -1.240522 | 1.289777  | H | 1.260060  | -0.639643 | 2.374052  |
| H         | -7.758965  | -0.780277 | 2.501553  | C | 1.740641  | 1.922094  | 0.069071  |
| C         | -9.141134  | -1.027389 | -1.103161 | H | 2.036996  | 1.896464  | -0.990594 |
| H         | -7.204722  | -0.408996 | -1.747201 | H | 0.715137  | 2.322669  | 0.096462  |
| C         | -9.969762  | -1.331485 | -0.012700 | C | 2.683860  | 2.856988  | 0.823311  |
| H         | -10.105035 | -1.477559 | 2.135199  | H | 2.343736  | 2.949177  | 1.866892  |
| H         | -9.535681  | -1.101795 | -2.113265 | H | 3.681902  | 2.403136  | 0.861251  |
| C         | -11.321778 | -1.734609 | -0.229759 | C | 2.714099  | 4.216525  | 0.200753  |
| N         | -12.424949 | -2.063875 | -0.405686 | H | 1.735624  | 4.703424  | 0.127907  |
| O         | 0.315350   | 1.404704  | -1.447307 | C | 3.765473  | 4.888104  | -0.286403 |
| C         | 0.476780   | 1.196001  | -2.810551 | C | 3.598075  | 6.249653  | -0.892224 |
| H         | -0.267769  | 0.489139  | -3.231101 | H | 2.555329  | 6.583920  | -0.875563 |
| H         | 0.366433   | 2.131397  | -3.389624 | H | 4.205195  | 6.995563  | -0.359717 |
| H         | 1.479181   | 0.793864  | -3.055446 | H | 3.945012  | 6.262406  | -1.935254 |
| H         | -0.713823  | 0.917292  | -0.892923 | C | 5.179351  | 4.392281  | -0.282245 |
| H         | -3.509921  | 0.695077  | 1.226327  | H | 5.291598  | 3.390737  | 0.141182  |
|           |            |           |           | H | 5.584073  | 4.375587  | -1.303830 |
| <b>36</b> |            |           |           | H | 5.824119  | 5.074210  | 0.289860  |
| B         | 0.914717   | -1.869062 | -0.226420 | O | 3.000050  | -0.056029 | 0.287021  |

|           |           |           |           |   |           |           |           |
|-----------|-----------|-----------|-----------|---|-----------|-----------|-----------|
| C         | -0.762695 | -0.044394 | 0.112559  | H | 5.435535  | -0.523941 | 2.264967  |
| H         | -1.059693 | -0.347081 | 1.120742  | H | 4.191745  | 0.745147  | 2.261800  |
| C         | -1.672627 | 0.508877  | -0.702357 | H | 3.719814  | -0.968714 | 2.333361  |
| H         | -1.348982 | 0.816983  | -1.699969 | C | 5.173890  | 0.839464  | -0.236010 |
| C         | -3.079059 | 0.760483  | -0.398744 | H | 5.165550  | 0.709883  | -1.329421 |
| C         | -3.861982 | 1.437725  | -1.346352 | H | 4.621429  | 1.769743  | -0.023569 |
| C         | -3.691139 | 0.354475  | 0.799135  | C | 6.622933  | 0.984475  | 0.227327  |
| C         | -5.199355 | 1.710516  | -1.114567 | H | 6.637938  | 1.203854  | 1.306687  |
| H         | -3.403040 | 1.754789  | -2.280861 | H | 7.129502  | 0.019854  | 0.100399  |
| C         | -5.024825 | 0.621366  | 1.044526  | C | 7.326193  | 2.085315  | -0.500025 |
| H         | -3.117042 | -0.184332 | 1.549053  | H | 6.867396  | 3.073132  | -0.381168 |
| C         | -5.790216 | 1.303499  | 0.087208  | C | 8.410337  | 2.010698  | -1.283254 |
| H         | -5.793129 | 2.236725  | -1.857245 | C | 8.967328  | 3.233104  | -1.950139 |
| H         | -5.488011 | 0.302179  | 1.974517  | H | 8.389590  | 4.132735  | -1.712397 |
| C         | -7.168935 | 1.578181  | 0.337711  | H | 10.010265 | 3.406969  | -1.648495 |
| N         | -8.293181 | 1.802010  | 0.542141  | H | 8.982454  | 3.114514  | -3.043084 |
| H         | 3.034068  | -0.932616 | 0.695706  | C | 9.174194  | 0.754974  | -1.574783 |
| H         | 0.792020  | -0.017605 | -1.319262 | H | 8.749069  | -0.134164 | -1.101934 |
|           |           |           |           | H | 9.218134  | 0.574020  | -2.657941 |
| <b>37</b> |           |           |           | H | 10.216713 | 0.850893  | -1.239731 |
| B         | 2.133890  | -1.807780 | -0.181703 | O | 5.115385  | -1.520908 | -0.029237 |
| O         | 2.916914  | -2.904146 | -0.764576 | C | 2.136084  | 0.666694  | 0.483915  |
| O         | 1.733469  | -2.284085 | 1.132611  | H | 1.971129  | 0.514361  | 1.554400  |
| C         | 2.510363  | -4.105853 | -0.110493 | C | 1.620617  | 1.793933  | -0.083058 |
| C         | 2.197131  | -3.614761 | 1.335679  | H | 1.848794  | 1.999464  | -1.132624 |
| C         | 1.272083  | -4.666654 | -0.808497 | C | 0.929991  | 2.874938  | 0.628533  |
| H         | 1.503915  | -4.833759 | -1.867475 | C | 0.365641  | 3.921119  | -0.119499 |
| H         | 0.966525  | -5.626781 | -0.374631 | C | 0.824037  | 2.929773  | 2.030023  |
| H         | 0.434824  | -3.961434 | -0.740408 | C | -0.316836 | 4.959814  | 0.490424  |
| C         | 3.636260  | -5.119368 | -0.210677 | H | 0.466282  | 3.904711  | -1.204775 |
| H         | 3.401233  | -6.025447 | 0.362772  | C | 0.147157  | 3.964255  | 2.651557  |
| H         | 3.777897  | -5.410032 | -1.258435 | H | 1.272770  | 2.151683  | 2.646648  |
| H         | 4.583152  | -4.711449 | 0.158006  | C | -0.437712 | 4.983204  | 1.885969  |
| C         | 1.124074  | -4.419574 | 2.047364  | H | -0.761814 | 5.753996  | -0.104595 |
| H         | 1.435161  | -5.465884 | 2.172004  | H | 0.061920  | 3.988329  | 3.735344  |
| H         | 0.952306  | -3.998536 | 3.047289  | C | -1.162602 | 6.034898  | 2.523485  |
| H         | 0.171198  | -4.398016 | 1.510484  | N | -1.762538 | 6.889578  | 3.038942  |
| C         | 3.440390  | -3.581856 | 2.221433  | H | 4.456834  | -2.162984 | -0.360231 |
| H         | 3.194410  | -3.049556 | 3.150401  | H | 3.046551  | -0.074873 | -1.260168 |
| H         | 3.769824  | -4.592083 | 2.494922  | C | -3.046541 | -3.336047 | -3.455984 |
| H         | 4.271003  | -3.058279 | 1.736022  | C | -3.018549 | -3.042509 | -2.091768 |
| C         | 2.963917  | -0.358240 | -0.194046 | C | -2.633560 | -1.750919 | -1.738947 |
| C         | 4.416181  | -0.348316 | 0.371682  | C | -2.271832 | -0.767993 | -2.668036 |
| C         | 4.435649  | -0.263621 | 1.899438  | C | -2.325716 | -1.103867 | -4.021206 |

|    |           |           |           |              |           |           |           |
|----|-----------|-----------|-----------|--------------|-----------|-----------|-----------|
| C  | -2.711453 | -2.381534 | -4.410731 | C            | -5.194504 | 3.557131  | -1.177937 |
| H  | -3.348910 | -4.326977 | -3.786416 | H            | -3.776490 | 5.168791  | -1.387548 |
| H  | -2.035716 | -0.373003 | -4.772819 | H            | -6.362469 | 1.754870  | -1.025115 |
| H  | -2.746773 | -2.637968 | -5.466181 | H            | -6.036685 | 4.215301  | -0.977571 |
| O  | -2.596901 | -1.362202 | -0.429450 | C            | -0.465134 | 0.023176  | 3.395885  |
| C  | -3.488849 | -4.016445 | -1.015720 | C            | -0.984203 | 0.846239  | 4.400366  |
| C  | -2.877032 | -3.627736 | 0.325077  | C            | 0.775370  | -0.600696 | 3.595996  |
| C  | -2.462134 | -2.318473 | 0.541005  | C            | -0.269678 | 1.055234  | 5.577863  |
| C  | -2.793805 | -4.496665 | 1.417333  | H            | -1.945309 | 1.339626  | 4.265514  |
| C  | -1.915251 | -1.867819 | 1.746778  | C            | 1.479933  | -0.391839 | 4.777635  |
| C  | -2.314640 | -4.066801 | 2.650203  | H            | 1.192854  | -1.243918 | 2.816363  |
| H  | -3.126904 | -5.526903 | 1.311741  | C            | 0.964821  | 0.442510  | 5.767159  |
| C  | -1.864407 | -2.759658 | 2.814658  | H            | -0.682145 | 1.703434  | 6.347830  |
| H  | -2.274326 | -4.761914 | 3.485041  | H            | 2.443800  | -0.877555 | 4.920089  |
| H  | -1.454341 | -2.434321 | 3.769144  | H            | 1.523655  | 0.613811  | 6.684315  |
| P  | -1.565550 | 0.807003  | -2.028252 | C            | -2.787348 | 0.852403  | 1.961812  |
| P  | -1.271656 | -0.154127 | 1.752798  | C            | -2.738938 | 2.199889  | 1.597222  |
| C  | -5.018506 | -3.884285 | -0.900039 | C            | -3.943395 | 0.348862  | 2.564869  |
| H  | -5.303607 | -2.856443 | -0.642355 | C            | -3.811628 | 3.042577  | 1.865346  |
| H  | -5.497987 | -4.145672 | -1.851804 | H            | -1.849630 | 2.594517  | 1.106831  |
| H  | -5.402239 | -4.553276 | -0.119576 | C            | -5.026825 | 1.187089  | 2.810339  |
| C  | -3.128940 | -5.457102 | -1.379837 | H            | -3.990251 | -0.699007 | 2.858982  |
| H  | -3.505428 | -6.157472 | -0.627513 | C            | -4.958172 | 2.535973  | 2.470943  |
| H  | -3.589246 | -5.750939 | -2.328717 | H            | -3.755596 | 4.092037  | 1.582138  |
| H  | -2.043373 | -5.588054 | -1.463285 | H            | -5.923529 | 0.787559  | 3.278689  |
| Cu | -0.100073 | 0.244441  | -0.277325 | H            | -5.801930 | 3.191569  | 2.674297  |
| C  | -0.859776 | 1.585548  | -3.531197 | O            | 0.883023  | -1.542628 | -1.003253 |
| C  | -1.655120 | 2.186544  | -4.514917 | C            | 1.052930  | -1.692240 | -2.390574 |
| C  | 0.526486  | 1.552463  | -3.704549 | H            | 0.172662  | -1.307255 | -2.914674 |
| C  | -1.070147 | 2.737690  | -5.648841 | H            | 1.940288  | -1.153562 | -2.765407 |
| H  | -2.736730 | 2.222050  | -4.390817 | H            | 1.173340  | -2.747286 | -2.668839 |
| C  | 1.112269  | 2.104430  | -4.840204 |              |           |           |           |
| H  | 1.147681  | 1.083962  | -2.941914 | <b>38-ts</b> |           |           |           |
| C  | 0.313330  | 2.697541  | -5.812110 | B            | -2.023364 | -1.588608 | -0.018245 |
| H  | -1.695466 | 3.200290  | -6.408585 | O            | -2.961618 | -2.597727 | 0.299932  |
| H  | 2.192102  | 2.073218  | -4.962015 | O            | -1.552670 | -1.741979 | -1.321045 |
| H  | 0.767909  | 3.132342  | -6.699068 | C            | -2.634281 | -3.682661 | -0.594624 |
| C  | -3.032237 | 1.859636  | -1.700679 | C            | -2.155119 | -2.929071 | -1.872747 |
| C  | -2.854722 | 3.247701  | -1.658919 | C            | -1.514888 | -4.477079 | 0.070471  |
| C  | -4.303693 | 1.331782  | -1.467257 | H            | -1.860992 | -4.824557 | 1.050806  |
| C  | -3.928612 | 4.091558  | -1.406606 | H            | -1.230961 | -5.352601 | -0.525535 |
| H  | -1.869404 | 3.674341  | -1.842078 | H            | -0.623736 | -3.851719 | 0.224625  |
| C  | -5.376668 | 2.178576  | -1.202812 | C            | -3.854659 | -4.556867 | -0.785066 |
| H  | -4.468018 | 0.256095  | -1.499512 | H            | -3.649464 | -5.348786 | -1.516327 |

|   |            |           |           |    |           |           |           |
|---|------------|-----------|-----------|----|-----------|-----------|-----------|
| H | -4.119495  | -5.034975 | 0.164704  | H  | -1.240200 | 2.880272  | -2.219635 |
| H | -4.717820  | -3.980375 | -1.131329 | C  | 0.683584  | 5.376140  | -0.952371 |
| C | -1.104042  | -3.667911 | -2.673714 | H  | 1.290307  | 5.548706  | 1.116006  |
| H | -1.497360  | -4.625636 | -3.039103 | H  | -0.077310 | 4.903458  | -2.917050 |
| H | -0.819480  | -3.064029 | -3.544784 | C  | 1.375115  | 6.543638  | -1.375128 |
| H | -0.198477  | -3.854888 | -2.087821 | N  | 1.948073  | 7.499467  | -1.721295 |
| C | -3.302498  | -2.532280 | -2.788554 | H  | -4.543181 | -1.742255 | -0.006107 |
| H | -2.926539  | -1.826729 | -3.541139 | H  | -3.350329 | 0.162371  | 1.234194  |
| H | -3.699033  | -3.406112 | -3.319942 | C  | 2.069161  | -4.372325 | 2.493808  |
| H | -4.119048  | -2.057164 | -2.235219 | C  | 2.339297  | -3.724230 | 1.286560  |
| C | -3.333433  | 0.274751  | 0.140528  | C  | 2.206268  | -2.338155 | 1.281562  |
| C | -4.731353  | 0.157777  | -0.457625 | C  | 1.875837  | -1.582080 | 2.409789  |
| C | -4.797006  | 0.597284  | -1.917079 | C  | 1.639773  | -2.267192 | 3.600757  |
| H | -5.752062  | 0.277869  | -2.347978 | C  | 1.719873  | -3.656530 | 3.635128  |
| H | -4.718912  | 1.686659  | -2.022027 | H  | 2.151868  | -5.454777 | 2.556275  |
| H | -3.997536  | 0.133677  | -2.505227 | H  | 1.374692  | -1.713798 | 4.499776  |
| C | -5.669904  | 1.030108  | 0.398106  | H  | 1.522696  | -4.186094 | 4.563613  |
| H | -5.596913  | 0.674113  | 1.437487  | O  | 2.432210  | -1.617786 | 0.141991  |
| H | -5.295169  | 2.066524  | 0.394013  | C  | 2.899650  | -4.420464 | 0.049844  |
| C | -7.138937  | 1.007642  | -0.023558 | C  | 2.532380  | -3.612613 | -1.188373 |
| H | -7.232361  | 1.444074  | -1.030833 | C  | 2.287622  | -2.247901 | -1.063682 |
| H | -7.464725  | -0.036164 | -0.105868 | C  | 2.506027  | -4.136705 | -2.482929 |
| C | -7.994686  | 1.785314  | 0.924383  | C  | 1.923144  | -1.426108 | -2.133407 |
| H | -7.722415  | 2.841888  | 1.021245  | C  | 2.227889  | -3.331461 | -3.583214 |
| C | -9.016410  | 1.350403  | 1.673907  | H  | 2.719271  | -5.191327 | -2.642313 |
| C | -9.754075  | 2.280675  | 2.590142  | C  | 1.916398  | -1.986348 | -3.409890 |
| H | -9.355860  | 3.300193  | 2.551513  | H  | 2.230220  | -3.762884 | -4.580925 |
| H | -10.822660 | 2.320946  | 2.334518  | H  | 1.647861  | -1.370412 | -4.266567 |
| H | -9.702927  | 1.932002  | 3.631605  | P  | 1.695072  | 0.228253  | 2.157763  |
| C | -9.532413  | -0.056422 | 1.688393  | P  | 1.402542  | 0.289217  | -1.749000 |
| H | -8.984348  | -0.729352 | 1.023692  | C  | 4.434523  | -4.429008 | 0.181339  |
| H | -9.486204  | -0.472803 | 2.704567  | H  | 4.827210  | -3.407958 | 0.270350  |
| H | -10.592016 | -0.081901 | 1.397175  | H  | 4.737234  | -4.992094 | 1.073292  |
| O | -5.239441  | -1.177666 | -0.381388 | H  | 4.890861  | -4.896568 | -0.700353 |
| C | -2.434863  | 1.218782  | -0.337094 | C  | 2.393769  | -5.856990 | -0.060998 |
| H | -2.519453  | 1.475516  | -1.397961 | H  | 2.831883  | -6.361826 | -0.928029 |
| C | -1.414177  | 1.878028  | 0.384332  | H  | 2.683748  | -6.445054 | 0.815837  |
| H | -1.508502  | 1.838460  | 1.473874  | H  | 1.301227  | -5.889775 | -0.156057 |
| C | -0.699570  | 3.038154  | -0.114053 | Cu | 0.270997  | 0.531482  | 0.290912  |
| C | 0.052704   | 3.829256  | 0.792444  | C  | 1.290096  | 0.853182  | 3.839207  |
| C | -0.708103  | 3.460416  | -1.467430 | C  | 2.224995  | 0.830471  | 4.881797  |
| C | 0.727468   | 4.963028  | 0.392087  | C  | 0.019300  | 1.381604  | 4.081898  |
| H | 0.084522   | 3.530216  | 1.840797  | C  | 1.886967  | 1.314456  | 6.139793  |
| C | -0.046306  | 4.602273  | -1.871818 | H  | 3.223606  | 0.431170  | 4.706818  |

|   |           |           |           |           |           |           |           |
|---|-----------|-----------|-----------|-----------|-----------|-----------|-----------|
| C | -0.318477 | 1.871929  | 5.340778  |           |           |           |           |
| H | -0.713503 | 1.407709  | 3.276772  | <b>39</b> |           |           |           |
| C | 0.615431  | 1.837055  | 6.370114  | C         | -0.259420 | 0.445306  | -3.003571 |
| H | 2.619137  | 1.287897  | 6.943289  | C         | -1.209251 | -0.581092 | -3.571979 |
| H | -1.309803 | 2.284036  | 5.512474  | C         | -0.966347 | -0.832340 | -5.054049 |
| H | 0.355910  | 2.220608  | 7.353922  | H         | -1.638883 | -1.606257 | -5.443121 |
| C | 3.430117  | 0.799989  | 1.992080  | H         | -1.127553 | 0.088850  | -5.625842 |
| C | 3.631582  | 2.139738  | 1.647700  | H         | 0.066415  | -1.162623 | -5.215178 |
| C | 4.534149  | -0.017111 | 2.247998  | C         | -2.643662 | -0.107059 | -3.305209 |
| C | 4.919548  | 2.658886  | 1.582374  | H         | -2.726595 | 0.072569  | -2.219033 |
| H | 2.773841  | 2.776271  | 1.417345  | H         | -2.795595 | 0.871845  | -3.787929 |
| C | 5.822783  | 0.504008  | 2.174642  | C         | -3.738148 | -1.087543 | -3.731453 |
| H | 4.386420  | -1.063721 | 2.513532  | H         | -3.884670 | -1.035890 | -4.818498 |
| C | 6.016066  | 1.843130  | 1.848345  | H         | -3.383105 | -2.104603 | -3.516540 |
| H | 5.067496  | 3.699582  | 1.302132  | C         | -5.039063 | -0.828634 | -3.028736 |
| H | 6.676924  | -0.137975 | 2.377650  | H         | -5.790566 | -0.246981 | -3.567803 |
| H | 7.022948  | 2.250231  | 1.790067  | C         | -5.326513 | -1.209633 | -1.776955 |
| C | 0.601401  | 0.824774  | -3.312825 | C         | -6.630504 | -0.863143 | -1.125634 |
| C | 1.227195  | 1.655188  | -4.245814 | H         | -7.290513 | -0.301342 | -1.795287 |
| C | -0.717476 | 0.409258  | -3.541585 | H         | -7.162591 | -1.767434 | -0.796332 |
| C | 0.535685  | 2.091676  | -5.373064 | H         | -6.466438 | -0.257140 | -0.221625 |
| H | 2.254127  | 1.978696  | -4.086931 | C         | -4.385280 | -1.979718 | -0.901384 |
| C | -1.399431 | 0.838493  | -4.675248 | H         | -3.461828 | -2.292768 | -1.401326 |
| H | -1.202677 | -0.252428 | -2.821834 | H         | -4.097963 | -1.368983 | -0.030342 |
| C | -0.779331 | 1.691125  | -5.586605 | H         | -4.870449 | -2.879983 | -0.496195 |
| H | 1.029261  | 2.747675  | -6.086434 | O         | -1.012343 | -1.854003 | -2.936856 |
| H | -2.424494 | 0.514147  | -4.846351 | C         | 1.114037  | 0.233877  | -2.832322 |
| H | -1.319401 | 2.037496  | -6.464711 | H         | 1.490463  | -0.773736 | -3.031193 |
| C | 2.980965  | 1.225405  | -1.755674 | C         | 2.003468  | 1.181052  | -2.276085 |
| C | 2.920869  | 2.614687  | -1.587478 | H         | 1.646195  | 2.209394  | -2.166037 |
| C | 4.224538  | 0.614569  | -1.923801 | C         | 3.348603  | 0.922222  | -1.871420 |
| C | 4.078351  | 3.380716  | -1.630958 | C         | 4.095753  | 1.947147  | -1.230402 |
| H | 1.957236  | 3.103439  | -1.442965 | C         | 4.001963  | -0.329332 | -2.038580 |
| C | 5.386632  | 1.382198  | -1.939354 | C         | 5.370494  | 1.734530  | -0.755450 |
| H | 4.290896  | -0.464494 | -2.054730 | H         | 3.627214  | 2.922905  | -1.096201 |
| C | 5.315974  | 2.764666  | -1.803683 | C         | 5.279984  | -0.544620 | -1.571277 |
| H | 4.014994  | 4.461381  | -1.515037 | H         | 3.481517  | -1.151353 | -2.527379 |
| H | 6.351235  | 0.895373  | -2.064786 | C         | 5.988796  | 0.478041  | -0.910894 |
| H | 6.224724  | 3.362094  | -1.824535 | H         | 5.908631  | 2.536781  | -0.254235 |
| O | -1.106456 | -1.176512 | 0.953305  | H         | 5.748075  | -1.518122 | -1.704876 |
| C | -1.429101 | -1.475133 | 2.296128  | C         | 7.295258  | 0.248087  | -0.406662 |
| H | -0.803434 | -0.865880 | 2.954498  | N         | 8.368873  | 0.060583  | 0.012790  |
| H | -2.481360 | -1.257268 | 2.521241  | H         | -1.001337 | -1.665407 | -1.983440 |
| H | -1.236742 | -2.534609 | 2.514831  | H         | -0.616072 | 1.479137  | -3.014783 |

|    |           |           |           |              |           |           |           |
|----|-----------|-----------|-----------|--------------|-----------|-----------|-----------|
| C  | -4.734342 | 0.775994  | 2.078257  | C            | -0.216424 | 3.374440  | 2.668369  |
| C  | -3.625594 | -0.061248 | 2.198366  | C            | 2.549678  | 3.044474  | 2.506960  |
| C  | -2.422822 | 0.394647  | 1.660152  | H            | 2.154929  | 1.903316  | 0.719813  |
| C  | -2.288706 | 1.618428  | 0.998875  | C            | 0.609971  | 3.928219  | 3.639827  |
| C  | -3.416434 | 2.439677  | 0.925154  | H            | -1.295650 | 3.513671  | 2.725962  |
| C  | -4.630005 | 2.017392  | 1.456363  | C            | 1.992349  | 3.766571  | 3.557709  |
| H  | -5.695776 | 0.461871  | 2.478067  | H            | 3.626999  | 2.900857  | 2.443419  |
| H  | -3.346492 | 3.407051  | 0.432111  | H            | 0.175599  | 4.491694  | 4.462279  |
| H  | -5.503318 | 2.660603  | 1.387120  | H            | 2.635078  | 4.203846  | 4.318206  |
| O  | -1.294810 | -0.382061 | 1.760298  | C            | 1.991386  | -2.885827 | -0.390458 |
| C  | -3.621491 | -1.407740 | 2.909827  | C            | 3.013034  | -3.531739 | 0.312678  |
| C  | -2.650671 | -2.314703 | 2.163769  | C            | 1.735072  | -3.254317 | -1.716719 |
| C  | -1.484299 | -1.740115 | 1.661311  | C            | 3.784568  | -4.508130 | -0.309276 |
| C  | -2.801798 | -3.690575 | 1.997601  | H            | 3.215673  | -3.263420 | 1.347759  |
| C  | -0.461245 | -2.473160 | 1.054302  | C            | 2.503779  | -4.237500 | -2.332168 |
| C  | -1.812395 | -4.450837 | 1.379121  | H            | 0.927783  | -2.776752 | -2.273232 |
| H  | -3.701629 | -4.183936 | 2.356807  | C            | 3.536247  | -4.857238 | -1.633787 |
| C  | -0.643057 | -3.852431 | 0.923016  | H            | 4.582498  | -4.997906 | 0.243822  |
| H  | -1.950435 | -5.522563 | 1.263133  | H            | 2.298341  | -4.513487 | -3.363760 |
| H  | 0.131100  | -4.453617 | 0.450257  | H            | 4.144294  | -5.616524 | -2.119786 |
| P  | -0.663553 | 1.987615  | 0.236514  | C            | 1.973076  | -1.057386 | 1.815712  |
| P  | 0.972173  | -1.562399 | 0.365529  | C            | 3.239230  | -0.513373 | 1.560270  |
| C  | -3.074915 | -1.200782 | 4.336563  | C            | 1.525923  | -1.153801 | 3.133501  |
| H  | -2.069071 | -0.765322 | 4.324027  | C            | 4.047385  | -0.092830 | 2.608138  |
| H  | -3.732686 | -0.526009 | 4.898237  | H            | 3.601031  | -0.430467 | 0.534299  |
| H  | -3.026059 | -2.161650 | 4.863750  | C            | 2.331370  | -0.711822 | 4.181209  |
| C  | -5.020002 | -2.006210 | 3.005339  | H            | 0.547183  | -1.579270 | 3.350332  |
| H  | -4.994757 | -2.969363 | 3.526078  | C            | 3.592192  | -0.185268 | 3.922111  |
| H  | -5.676346 | -1.355871 | 3.593597  | H            | 5.034177  | 0.315214  | 2.395547  |
| H  | -5.474100 | -2.154729 | 2.017320  | H            | 1.971749  | -0.789635 | 5.204562  |
| Cu | 0.273973  | 0.239191  | -0.888992 | H            | 4.221112  | 0.151762  | 4.742742  |
| C  | -0.969373 | 3.462189  | -0.805235 |              |           |           |           |
| C  | -0.167748 | 4.602606  | -0.703490 | <b>40-ts</b> |           |           |           |
| C  | -1.926017 | 3.394241  | -1.827893 | C            | 2.353534  | -2.151882 | 1.636457  |
| C  | -0.324897 | 5.655499  | -1.601825 | C            | 3.497646  | -2.879888 | 0.936805  |
| H  | 0.584802  | 4.673111  | 0.080353  | C            | 3.488892  | -4.384133 | 1.160269  |
| C  | -2.086929 | 4.450542  | -2.716431 | H            | 4.284571  | -4.875961 | 0.587776  |
| H  | -2.554033 | 2.509127  | -1.927503 | H            | 3.631996  | -4.612241 | 2.223552  |
| C  | -1.283374 | 5.583579  | -2.606878 | H            | 2.532530  | -4.815081 | 0.840168  |
| H  | 0.305286  | 6.537010  | -1.511286 | C            | 4.816358  | -2.252761 | 1.404797  |
| H  | -2.839083 | 4.385241  | -3.499270 | H            | 4.751835  | -1.168198 | 1.214418  |
| H  | -1.404368 | 6.407004  | -3.306418 | H            | 4.904233  | -2.363433 | 2.496947  |
| C  | 0.338949  | 2.645475  | 1.612715  | C            | 6.064160  | -2.804606 | 0.714329  |
| C  | 1.723563  | 2.479237  | 1.540326  | H            | 6.277454  | -3.814471 | 1.090775  |



|   |           |           |           |    |           |           |           |
|---|-----------|-----------|-----------|----|-----------|-----------|-----------|
| H | 5.835511  | -2.918431 | -0.353772 | C  | 1.331804  | 2.224017  | -4.415288 |
| C | 7.269311  | -1.934151 | 0.912759  | C  | -0.145335 | 0.469047  | -2.808572 |
| H | 7.927059  | -2.189331 | 1.747576  | C  | 1.108094  | 0.913465  | -4.827872 |
| C | 7.583052  | -0.855236 | 0.183482  | H  | 1.911781  | 2.888422  | -5.051136 |
| C | 8.803204  | -0.036761 | 0.475908  | C  | 0.370747  | 0.042077  | -4.033550 |
| H | 9.371390  | -0.435834 | 1.322917  | H  | 1.511779  | 0.569555  | -5.776644 |
| H | 9.471216  | 0.001275  | -0.396548 | H  | 0.208720  | -0.984879 | -4.354984 |
| H | 8.537219  | 1.005710  | 0.702145  | P  | -0.669430 | 1.593634  | 1.563389  |
| C | 6.760200  | -0.364928 | -0.970063 | P  | -0.987806 | -0.639101 | -1.616920 |
| H | 5.856371  | -0.959416 | -1.142205 | C  | -0.372889 | 4.872151  | -3.146857 |
| H | 6.449485  | 0.676637  | -0.801475 | H  | -1.262815 | 4.384946  | -2.731051 |
| H | 7.349269  | -0.359240 | -1.898219 | H  | -0.350355 | 5.909409  | -2.789496 |
| O | 3.366952  | -2.700216 | -0.483262 | H  | -0.465206 | 4.880203  | -4.240182 |
| C | 1.016616  | -2.570386 | 1.360587  | C  | 2.113365  | 4.859345  | -3.339235 |
| H | 0.900548  | -3.221547 | 0.487921  | H  | 2.032724  | 4.893702  | -4.430844 |
| C | -0.139281 | -2.118510 | 1.967566  | H  | 2.151760  | 5.899805  | -2.999354 |
| H | -0.041548 | -1.509654 | 2.872081  | H  | 3.058554  | 4.370505  | -3.074342 |
| C | -1.470120 | -2.655338 | 1.722362  | Cu | -0.009933 | -0.320894 | 0.464922  |
| C | -2.543462 | -2.202971 | 2.518083  | C  | -0.255449 | 1.701165  | 3.341334  |
| C | -1.755097 | -3.639385 | 0.749711  | C  | -1.019007 | 2.396118  | 4.282361  |
| C | -3.827349 | -2.688523 | 2.357761  | C  | 0.913318  | 1.049250  | 3.752332  |
| H | -2.346552 | -1.446088 | 3.278042  | C  | -0.613397 | 2.441927  | 5.613498  |
| C | -3.030936 | -4.147224 | 0.595905  | H  | -1.932081 | 2.903768  | 3.974812  |
| H | -0.964715 | -4.015975 | 0.101990  | C  | 1.321575  | 1.103492  | 5.080106  |
| C | -4.086492 | -3.676785 | 1.395286  | H  | 1.502133  | 0.497198  | 3.017279  |
| H | -4.637989 | -2.315147 | 2.979678  | C  | 0.555502  | 1.799569  | 6.012269  |
| H | -3.226298 | -4.910022 | -0.154723 | H  | -1.212907 | 2.983072  | 6.341686  |
| C | -5.404157 | -4.190598 | 1.225599  | H  | 2.232288  | 0.595805  | 5.388986  |
| N | -6.484983 | -4.603430 | 1.082698  | H  | 0.867696  | 1.836486  | 7.053177  |
| H | 3.124225  | -1.765450 | -0.618086 | C  | -2.430726 | 2.071909  | 1.460076  |
| H | 2.552609  | -1.862866 | 2.675904  | C  | -3.377438 | 1.049775  | 1.373214  |
| C | 1.693789  | 5.030043  | -0.427653 | C  | -2.858937 | 3.403606  | 1.486062  |
| C | 0.982761  | 4.118779  | -1.208591 | C  | -4.735587 | 1.347441  | 1.338979  |
| C | 0.245762  | 3.147006  | -0.534413 | H  | -3.046572 | 0.013021  | 1.312309  |
| C | 0.196724  | 3.045709  | 0.857323  | C  | -4.217145 | 3.700396  | 1.438870  |
| C | 0.902678  | 3.989699  | 1.603971  | H  | -2.127362 | 4.209153  | 1.545768  |
| C | 1.648990  | 4.973147  | 0.962758  | C  | -5.156234 | 2.673035  | 1.369913  |
| H | 2.290728  | 5.802023  | -0.906900 | H  | -5.460807 | 0.538941  | 1.265869  |
| H | 0.884774  | 3.939273  | 2.691272  | H  | -4.544136 | 4.737413  | 1.456503  |
| H | 2.203180  | 5.700716  | 1.550092  | H  | -6.217124 | 2.909552  | 1.334413  |
| O | -0.458913 | 2.204370  | -1.241431 | C  | -0.740340 | -2.303923 | -2.332890 |
| C | 0.916485  | 4.138706  | -2.729478 | C  | -1.716794 | -3.043488 | -3.001899 |
| C | 0.814781  | 2.696386  | -3.209732 | C  | 0.514019  | -2.879294 | -2.101157 |
| C | 0.085569  | 1.795597  | -2.434890 | C  | -1.444110 | -4.348833 | -3.407328 |

|              |           |           |           |   |           |           |           |
|--------------|-----------|-----------|-----------|---|-----------|-----------|-----------|
| H            | -2.697649 | -2.610413 | -3.190138 | H | -7.087124 | 0.682354  | -2.840688 |
| C            | 0.787313  | -4.178291 | -2.509597 | C | -5.330594 | -1.088935 | -4.061870 |
| H            | 1.281000  | -2.317011 | -1.571543 | H | -4.384554 | -1.638512 | -4.088598 |
| C            | -0.198905 | -4.919934 | -3.158120 | H | -5.984452 | -1.567274 | -3.316561 |
| H            | -2.212836 | -4.922879 | -3.919725 | H | -5.825278 | -1.222839 | -5.034166 |
| H            | 1.767608  | -4.602899 | -2.301787 | O | -0.105713 | -0.769136 | -2.615829 |
| H            | 0.001528  | -5.942648 | -3.468860 | C | 2.080767  | 1.172034  | -1.882374 |
| C            | -2.770254 | -0.282390 | -1.843440 | H | 2.420590  | 0.171450  | -2.168511 |
| C            | -3.693218 | -1.101337 | -1.179817 | C | 3.056683  | 2.064799  | -1.267328 |
| C            | -3.238534 | 0.804205  | -2.584900 | H | 2.843021  | 3.122340  | -1.473138 |
| C            | -5.056182 | -0.853916 | -1.279214 | C | 4.487229  | 1.746260  | -1.359287 |
| H            | -3.341605 | -1.944964 | -0.585579 | C | 5.435003  | 2.766589  | -1.557051 |
| C            | -4.604703 | 1.066136  | -2.660987 | C | 4.969143  | 0.436969  | -1.171335 |
| H            | -2.537236 | 1.448524  | -3.113343 | C | 6.791398  | 2.499771  | -1.585757 |
| C            | -5.515391 | 0.236482  | -2.015180 | H | 5.085864  | 3.788569  | -1.697001 |
| H            | -5.762274 | -1.507281 | -0.769659 | C | 6.321858  | 0.154947  | -1.206391 |
| H            | -4.956100 | 1.918326  | -3.238070 | H | 4.265277  | -0.370203 | -0.974212 |
| H            | -6.581663 | 0.439153  | -2.082931 | C | 7.251208  | 1.185079  | -1.417013 |
| H            | 2.302902  | -1.030694 | 0.927558  | H | 7.508132  | 3.301742  | -1.746545 |
| C            | 2.841479  | 0.979662  | 0.212458  | H | 6.668985  | -0.866215 | -1.060495 |
| H            | 3.914020  | 0.776481  | 0.036908  | C | 8.646618  | 0.899572  | -1.453312 |
| H            | 2.749446  | 1.392447  | 1.235775  | N | 9.788219  | 0.665504  | -1.483819 |
| H            | 2.546118  | 1.780560  | -0.483623 | H | -0.355910 | -0.797042 | -1.679475 |
| O            | 2.068147  | -0.168068 | 0.021877  | H | 0.432224  | 2.495636  | -1.950237 |
|              |           |           |           | C | -5.225651 | -0.668866 | -0.356178 |
| <b>41-ts</b> |           |           |           | C | -4.080952 | -1.386341 | -0.005685 |
| C            | 0.761052  | 1.461012  | -2.104262 | C | -2.974600 | -0.645392 | 0.404712  |
| C            | -0.133888 | 0.608057  | -2.998180 | C | -2.967310 | 0.750287  | 0.479340  |
| C            | 0.391112  | 0.631837  | -4.428571 | C | -4.138562 | 1.428195  | 0.140754  |
| H            | -0.223342 | 0.008459  | -5.088014 | C | -5.258677 | 0.719408  | -0.277710 |
| H            | 0.395297  | 1.656521  | -4.817398 | H | -6.119501 | -1.200603 | -0.676337 |
| H            | 1.417682  | 0.249237  | -4.454310 | H | -4.168690 | 2.514436  | 0.196999  |
| C            | -1.570885 | 1.128735  | -2.923735 | H | -6.166947 | 1.254113  | -0.545472 |
| H            | -1.871421 | 1.142005  | -1.863490 | O | -1.816502 | -1.273346 | 0.795914  |
| H            | -1.576729 | 2.177684  | -3.264485 | C | -4.013503 | -2.905162 | 0.081874  |
| C            | -2.614369 | 0.337555  | -3.699692 | C | -2.574416 | -3.338381 | -0.161657 |
| H            | -2.324033 | 0.280543  | -4.761412 | C | -1.537448 | -2.493395 | 0.236238  |
| H            | -2.621175 | -0.700144 | -3.335060 | C | -2.215699 | -4.579098 | -0.685966 |
| C            | -3.974155 | 0.961468  | -3.580016 | C | -0.183364 | -2.818105 | 0.095934  |
| H            | -3.980548 | 2.031521  | -3.342942 | C | -0.881573 | -4.957872 | -0.793353 |
| C            | -5.160158 | 0.364045  | -3.744919 | H | -2.988778 | -5.272900 | -1.006667 |
| C            | -6.442671 | 1.126672  | -3.614398 | C | 0.127063  | -4.085178 | -0.406094 |
| H            | -6.272212 | 2.177529  | -3.355182 | H | -0.627630 | -5.938289 | -1.187514 |
| H            | -7.021931 | 1.093893  | -4.548199 | H | 1.168258  | -4.381011 | -0.511623 |

|    |           |           |           |           |           |           |           |
|----|-----------|-----------|-----------|-----------|-----------|-----------|-----------|
| P  | -1.403130 | 1.538496  | 1.019989  | C         | 1.426831  | -1.794990 | 2.276030  |
| P  | 1.092283  | -1.552030 | 0.495729  | C         | 2.330695  | -0.906866 | 2.874020  |
| C  | -4.404440 | -3.313690 | 1.515579  | C         | 0.871047  | -2.828793 | 3.030252  |
| H  | -3.746846 | -2.850391 | 2.260516  | C         | 2.693822  | -1.075409 | 4.205110  |
| H  | -5.434656 | -3.001763 | 1.728550  | H         | 2.722869  | -0.069610 | 2.291968  |
| H  | -4.337384 | -4.402937 | 1.629663  | C         | 1.219079  | -2.977606 | 4.371208  |
| C  | -4.972263 | -3.572876 | -0.899631 | H         | 0.171022  | -3.525735 | 2.571809  |
| H  | -4.958361 | -4.661122 | -0.780700 | C         | 2.135560  | -2.109123 | 4.955659  |
| H  | -6.004465 | -3.259157 | -0.712197 | H         | 3.404277  | -0.390025 | 4.662203  |
| H  | -4.716672 | -3.333170 | -1.938650 | H         | 0.778416  | -3.781307 | 4.956428  |
| Cu | 0.574863  | 0.747128  | 0.076841  | H         | 2.413106  | -2.234505 | 5.999769  |
| C  | -1.756248 | 3.335424  | 0.875542  | O         | 2.042216  | 1.821193  | 1.105560  |
| C  | -1.752662 | 4.184161  | 1.985782  | C         | 1.758194  | 3.149983  | 1.431300  |
| C  | -1.926282 | 3.891884  | -0.399584 | H         | 1.254398  | 3.232086  | 2.409384  |
| C  | -1.912661 | 5.558132  | 1.823711  | H         | 2.679215  | 3.756602  | 1.495978  |
| H  | -1.614485 | 3.773932  | 2.984351  | H         | 1.097028  | 3.645110  | 0.690945  |
| C  | -2.098658 | 5.261577  | -0.557809 | H         | 2.716031  | 1.943440  | -0.030143 |
| H  | -1.933856 | 3.248669  | -1.278655 |           |           |           |           |
| C  | -2.086012 | 6.099532  | 0.554878  | <b>42</b> |           |           |           |
| H  | -1.903091 | 6.205781  | 2.697218  | C         | -0.607382 | -0.675579 | -0.743998 |
| H  | -2.237803 | 5.676666  | -1.553277 | C         | -1.617662 | -0.060602 | 0.242957  |
| H  | -2.210937 | 7.172532  | 0.431184  | C         | -1.208669 | -0.349663 | 1.675486  |
| C  | -1.447599 | 1.247400  | 2.829356  | H         | -1.876456 | 0.153903  | 2.381667  |
| C  | -0.240484 | 1.085032  | 3.511786  | H         | -1.236581 | -1.428162 | 1.871734  |
| C  | -2.651924 | 1.220742  | 3.541642  | H         | -0.189723 | 0.007582  | 1.861110  |
| C  | -0.237737 | 0.903047  | 4.892542  | C         | -3.009485 | -0.608070 | -0.083280 |
| H  | 0.695079  | 1.091021  | 2.949523  | H         | -3.230143 | -0.372229 | -1.138231 |
| C  | -2.645098 | 1.039184  | 4.919609  | H         | -2.983211 | -1.707365 | -0.022251 |
| H  | -3.598982 | 1.347909  | 3.017749  | C         | -4.143726 | -0.069110 | 0.786629  |
| C  | -1.437003 | 0.881351  | 5.596430  | H         | -3.987646 | -0.393600 | 1.827036  |
| H  | 0.707603  | 0.768324  | 5.414105  | H         | -4.094891 | 1.026782  | 0.796218  |
| H  | -3.584430 | 1.020051  | 5.467428  | C         | -5.473404 | -0.565145 | 0.314815  |
| H  | -1.433658 | 0.737383  | 6.674433  | H         | -5.579919 | -1.654960 | 0.321235  |
| C  | 2.579935  | -2.293784 | -0.299516 | C         | -6.517533 | 0.146085  | -0.130088 |
| C  | 3.670197  | -2.772922 | 0.431325  | C         | -7.774979 | -0.532637 | -0.584667 |
| C  | 2.617038  | -2.365022 | -1.700560 | H         | -7.710106 | -1.622493 | -0.499796 |
| C  | 4.780384  | -3.302750 | -0.224202 | H         | -8.640310 | -0.194562 | 0.002939  |
| H  | 3.659822  | -2.736059 | 1.518518  | H         | -8.001025 | -0.283356 | -1.631257 |
| C  | 3.722442  | -2.902603 | -2.349070 | C         | -6.563712 | 1.640905  | -0.221005 |
| H  | 1.769907  | -2.001261 | -2.283542 | H         | -5.635972 | 2.128452  | 0.089989  |
| C  | 4.809978  | -3.369197 | -1.612846 | H         | -6.784360 | 1.956528  | -1.250297 |
| H  | 5.622358  | -3.669146 | 0.358641  | H         | -7.378237 | 2.038924  | 0.400109  |
| H  | 3.735940  | -2.953950 | -3.435218 | O         | -1.603510 | 1.359921  | 0.115223  |
| H  | 5.676884  | -3.784609 | -2.121380 | C         | 0.780988  | -0.163556 | -0.580347 |

|              |           |           |           |   |           |           |           |
|--------------|-----------|-----------|-----------|---|-----------|-----------|-----------|
| H            | 0.881623  | 0.923758  | -0.577453 | C | 0.466466  | -3.622970 | -0.615383 |
| C            | 1.857317  | -0.946404 | -0.433830 | H | 0.663473  | -3.922140 | 0.415234  |
| H            | 1.710556  | -2.029675 | -0.424277 | C | 1.505388  | -3.166532 | -1.403066 |
| C            | 3.243922  | -0.508911 | -0.287269 | C | 2.918054  | -3.387213 | -1.152311 |
| C            | 4.240606  | -1.478811 | -0.102955 | C | 3.403748  | -3.849585 | 0.084770  |
| C            | 3.630507  | 0.841104  | -0.328256 | C | 3.835091  | -3.213839 | -2.204824 |
| C            | 5.572393  | -1.127698 | 0.038139  | C | 4.745131  | -4.129589 | 0.263840  |
| H            | 3.956019  | -2.528806 | -0.071648 | H | 2.719930  | -3.977425 | 0.921058  |
| C            | 4.956004  | 1.206551  | -0.188201 | C | 5.177517  | -3.502996 | -2.041124 |
| H            | 2.882668  | 1.616426  | -0.475378 | H | 3.472313  | -2.839923 | -3.160367 |
| C            | 5.938549  | 0.222563  | -0.003967 | C | 5.643370  | -3.964459 | -0.801778 |
| H            | 6.333997  | -1.889917 | 0.180151  | H | 5.112070  | -4.487751 | 1.222851  |
| H            | 5.244659  | 2.253887  | -0.221278 | H | 5.875581  | -3.373219 | -2.864560 |
| C            | 7.308786  | 0.598373  | 0.138760  | C | 7.028099  | -4.259066 | -0.622003 |
| N            | 8.425882  | 0.905521  | 0.255169  | N | 8.158241  | -4.498940 | -0.475004 |
| H            | -1.922663 | 1.578878  | -0.769276 | H | -1.039353 | -3.341058 | -2.104585 |
| H            | -0.623008 | -1.771180 | -0.649829 | H | 1.254829  | -2.799800 | -2.400010 |
| H            | -0.963476 | -0.443198 | -1.762739 | C | 2.664624  | 3.772309  | 2.893491  |
|              |           |           |           | C | 1.664394  | 3.815797  | 1.922696  |
|              |           |           |           | C | 0.895664  | 2.666538  | 1.748461  |
| <b>43-ts</b> |           |           |           | C | 1.082892  | 1.494536  | 2.482003  |
| C            | -0.846559 | -3.486905 | -1.040316 | C | 2.081626  | 1.496664  | 3.456158  |
| C            | -1.972940 | -3.101217 | -0.157221 | C | 2.867438  | 2.627502  | 3.658708  |
| C            | -1.817979 | -3.439776 | 1.314625  | H | 3.291729  | 4.643665  | 3.064232  |
| H            | -2.535548 | -2.861170 | 1.908488  | H | 2.256819  | 0.600758  | 4.048779  |
| H            | -2.000651 | -4.506772 | 1.498188  | H | 3.644402  | 2.616791  | 4.419090  |
| H            | -0.818242 | -3.183590 | 1.683606  | O | -0.106999 | 2.649890  | 0.807671  |
| C            | -3.342855 | -3.494084 | -0.702392 | C | 1.311847  | 5.042243  | 1.092656  |
| H            | -3.369430 | -3.181567 | -1.758257 | C | 0.854652  | 4.556869  | -0.275984 |
| H            | -3.448332 | -4.589678 | -0.691984 | C | 0.116613  | 3.373887  | -0.335654 |
| C            | -4.514877 | -2.852242 | 0.041239  | C | 1.041869  | 5.250587  | -1.471034 |
| H            | -4.665159 | -3.341311 | 1.012735  | C | -0.438545 | 2.870774  | -1.514731 |
| H            | -4.241303 | -1.808308 | 0.263212  | C | 0.489288  | 4.787940  | -2.662719 |
| C            | -5.765936 | -2.857848 | -0.777176 | H | 1.616983  | 6.173620  | -1.475242 |
| H            | -5.675907 | -2.329504 | -1.733739 | C | -0.251029 | 3.611120  | -2.684468 |
| C            | -6.947198 | -3.429589 | -0.506728 | H | 0.638711  | 5.350285  | -3.580972 |
| C            | -8.090946 | -3.330049 | -1.471389 | H | -0.666291 | 3.245947  | -3.621970 |
| H            | -7.829795 | -2.751700 | -2.363891 | P | 0.055800  | 0.043041  | 2.024657  |
| H            | -8.421760 | -4.327535 | -1.793939 | P | -1.259611 | 1.230587  | -1.448387 |
| H            | -8.963882 | -2.856864 | -0.999698 | C | 0.120479  | 5.754896  | 1.763757  |
| C            | -7.260425 | -4.209743 | 0.733411  | H | -0.749333 | 5.092566  | 1.847013  |
| H            | -6.417957 | -4.290979 | 1.425249  | H | 0.397189  | 6.085261  | 2.772913  |
| H            | -8.099944 | -3.752051 | 1.275066  | H | -0.172829 | 6.633904  | 1.175750  |
| H            | -7.584072 | -5.227331 | 0.473685  | C | 2.473796  | 6.024344  | 0.995117  |
| O            | -1.664429 | -1.767618 | -0.470521 |   |           |           |           |

|    |           |           |           |           |           |           |           |
|----|-----------|-----------|-----------|-----------|-----------|-----------|-----------|
| H  | 2.185907  | 6.907902  | 0.415155  | C         | -5.580139 | 2.075781  | -0.010464 |
| H  | 2.758786  | 6.386181  | 1.988881  | H         | -5.918149 | -0.006662 | -0.482795 |
| H  | 3.355669  | 5.572468  | 0.524657  | H         | -4.942011 | 4.096697  | 0.367540  |
| Cu | -0.078663 | -0.493545 | -0.287872 | H         | -6.596632 | 2.247901  | 0.336114  |
| C  | 0.786164  | -1.295390 | 3.043197  | B         | 1.890794  | -0.332473 | -0.934216 |
| C  | 0.110509  | -1.900828 | 4.105761  | O         | 2.493407  | -0.302302 | -2.183259 |
| C  | 2.047001  | -1.782769 | 2.669075  | O         | 2.673650  | 0.345288  | -0.011318 |
| C  | 0.684071  | -2.971980 | 4.787055  | C         | 3.553834  | 0.682617  | -2.150217 |
| H  | -0.874134 | -1.539929 | 4.399215  | C         | 3.912832  | 0.742418  | -0.635979 |
| C  | 2.626477  | -2.834844 | 3.369643  | C         | 4.684194  | 0.238768  | -3.054644 |
| H  | 2.572967  | -1.320619 | 1.830042  | H         | 4.333531  | 0.201366  | -4.092752 |
| C  | 1.943656  | -3.437213 | 4.425332  | H         | 5.515887  | 0.953521  | -3.005535 |
| H  | 0.145185  | -3.439657 | 5.607981  | H         | 5.063652  | -0.751495 | -2.784138 |
| H  | 3.618038  | -3.186763 | 3.089414  | C         | 2.946768  | 1.976242  | -2.671575 |
| H  | 2.395404  | -4.267226 | 4.963485  | H         | 3.688017  | 2.780557  | -2.754682 |
| C  | -1.526010 | 0.415411  | 2.876644  | H         | 2.520882  | 1.793736  | -3.666190 |
| C  | -2.707866 | -0.017669 | 2.271403  | H         | 2.132290  | 2.312204  | -2.019864 |
| C  | -1.586683 | 1.087237  | 4.102887  | C         | 4.961856  | -0.273458 | -0.211988 |
| C  | -3.935560 | 0.204502  | 2.890277  | H         | 5.959543  | -0.018157 | -0.590101 |
| H  | -2.646374 | -0.527134 | 1.307516  | H         | 5.004451  | -0.293069 | 0.884311  |
| C  | -2.813694 | 1.311173  | 4.717509  | H         | 4.700796  | -1.278334 | -0.560756 |
| H  | -0.668019 | 1.429370  | 4.579535  | C         | 4.290638  | 2.118076  | -0.124494 |
| C  | -3.988576 | 0.867813  | 4.112293  | H         | 4.495891  | 2.063443  | 0.951736  |
| H  | -4.852843 | -0.129659 | 2.408461  | H         | 5.193581  | 2.488898  | -0.627172 |
| H  | -2.855013 | 1.833038  | 5.671042  | H         | 3.480017  | 2.840121  | -0.272151 |
| H  | -4.947502 | 1.045145  | 4.594354  |           |           |           |           |
| C  | -1.491237 | 0.845821  | -3.225428 | <b>44</b> |           |           |           |
| C  | -2.593439 | 1.281668  | -3.967732 | C         | -1.924655 | 2.276975  | -0.193230 |
| C  | -0.482373 | 0.112011  | -3.860581 | C         | -0.895372 | 3.084613  | 0.572050  |
| C  | -2.686894 | 0.986289  | -5.324104 | C         | -1.128053 | 3.011358  | 2.083467  |
| H  | -3.381635 | 1.855380  | -3.481550 | H         | -0.320661 | 3.539244  | 2.605676  |
| C  | -0.576657 | -0.175509 | -5.219550 | H         | -2.086741 | 3.462023  | 2.379704  |
| H  | 0.384646  | -0.218545 | -3.285250 | H         | -1.109037 | 1.972263  | 2.432953  |
| C  | -1.679138 | 0.257625  | -5.951191 | C         | -0.995903 | 4.549040  | 0.095954  |
| H  | -3.548557 | 1.327259  | -5.893689 | H         | -0.781511 | 4.541810  | -0.984504 |
| H  | 0.212683  | -0.743008 | -5.707767 | H         | -2.023219 | 4.929733  | 0.218007  |
| H  | -1.754276 | 0.027213  | -7.011516 | C         | 0.006625  | 5.476703  | 0.790856  |
| C  | -2.961978 | 1.636745  | -0.896401 | H         | -0.383376 | 5.769857  | 1.776385  |
| C  | -3.899614 | 0.595558  | -0.902050 | H         | 0.918861  | 4.894470  | 0.977755  |
| C  | -3.348586 | 2.896653  | -0.437185 | C         | 0.321005  | 6.704763  | -0.004950 |
| C  | -5.201606 | 0.814987  | -0.471554 | H         | -0.384098 | 7.536244  | 0.086425  |
| H  | -3.582077 | -0.397119 | -1.226798 | C         | 1.349979  | 6.862340  | -0.848708 |
| C  | -4.651934 | 3.111502  | 0.009009  | C         | 1.545072  | 8.133371  | -1.618618 |
| H  | -2.631750 | 3.717905  | -0.428369 | H         | 0.771082  | 8.874738  | -1.392577 |

|   |            |           |           |    |           |           |           |
|---|------------|-----------|-----------|----|-----------|-----------|-----------|
| H | 2.524180   | 8.583409  | -1.399035 | P  | 1.374239  | -0.227577 | 2.082723  |
| H | 1.532336   | 7.945514  | -2.701892 | P  | 1.298830  | -0.054495 | -1.893132 |
| C | 2.383758   | 5.809494  | -1.116646 | C  | 4.743905  | -4.347898 | -0.257620 |
| H | 2.211512   | 4.880993  | -0.560024 | H  | 4.955765  | -3.273048 | -0.239184 |
| H | 2.404305   | 5.552599  | -2.186081 | H  | 5.269396  | -4.816094 | 0.584020  |
| H | 3.391045   | 6.180186  | -0.873070 | H  | 5.143613  | -4.760057 | -1.192729 |
| O | 0.359389   | 2.599344  | 0.226785  | C  | 3.014932  | -6.139457 | -0.188995 |
| C | -2.745082  | 1.332394  | 0.278340  | H  | 3.416013  | -6.570826 | -1.112274 |
| H | -2.760149  | 1.108616  | 1.349414  | H  | 3.548346  | -6.625649 | 0.634614  |
| C | -3.632908  | 0.488038  | -0.584972 | H  | 1.951125  | -6.398106 | -0.116755 |
| C | -5.110106  | 0.554177  | -0.252381 | Cu | 0.544914  | 0.648703  | 0.140419  |
| C | -5.602516  | 1.282948  | 0.833879  | C  | 0.278465  | -0.025004 | 3.532606  |
| C | -6.021687  | -0.149162 | -1.054708 | C  | 0.656166  | 0.651056  | 4.693200  |
| C | -6.959953  | 1.307931  | 1.120032  | C  | -1.033624 | -0.500004 | 3.407576  |
| H | -4.916687  | 1.852690  | 1.456349  | C  | -0.270370 | 0.858270  | 5.713367  |
| C | -7.378510  | -0.130705 | -0.784318 | H  | 1.672602  | 1.028224  | 4.798011  |
| H | -5.649675  | -0.718643 | -1.905952 | C  | -1.950925 | -0.303972 | 4.432555  |
| C | -7.856056  | 0.599121  | 0.312940  | H  | -1.351072 | -0.997113 | 2.488255  |
| H | -7.333402  | 1.880146  | 1.965461  | C  | -1.571593 | 0.383170  | 5.584744  |
| H | -8.076188  | -0.676153 | -1.414502 | H  | 0.027439  | 1.394783  | 6.611344  |
| C | -9.254858  | 0.622160  | 0.602386  | H  | -2.968479 | -0.673195 | 4.322805  |
| N | -10.395170 | 0.639101  | 0.836835  | H  | -2.293700 | 0.551302  | 6.380295  |
| H | -1.905592  | 2.456782  | -1.276333 | C  | 2.857205  | 0.775282  | 2.467724  |
| H | -3.515363  | 0.797358  | -1.637334 | C  | 2.841467  | 2.121878  | 2.076824  |
| C | 2.511553   | -4.703486 | 2.316350  | C  | 3.973211  | 0.257676  | 3.131750  |
| C | 2.703301   | -4.007211 | 1.124020  | C  | 3.940243  | 2.931598  | 2.347706  |
| C | 2.419766   | -2.640613 | 1.123457  | H  | 1.970876  | 2.521455  | 1.541845  |
| C | 1.932212   | -1.965499 | 2.246748  | C  | 5.067296  | 1.075821  | 3.398366  |
| C | 1.775425   | -2.696983 | 3.428264  | H  | 3.987740  | -0.786506 | 3.441924  |
| C | 2.064527   | -4.055063 | 3.463606  | C  | 5.052484  | 2.411875  | 3.005581  |
| H | 2.716309   | -5.770175 | 2.357738  | H  | 3.927611  | 3.974385  | 2.033406  |
| H | 1.400900   | -2.195754 | 4.319284  | H  | 5.934285  | 0.667745  | 3.913044  |
| H | 1.933563   | -4.614553 | 4.386180  | H  | 5.911400  | 3.046726  | 3.211725  |
| O | 2.579465   | -1.912609 | -0.033130 | C  | 0.304141  | 0.402906  | -3.352760 |
| C | 3.232864   | -4.631019 | -0.159317 | C  | 0.799993  | 1.097685  | -4.456725 |
| C | 2.537294   | -3.935154 | -1.319912 | C  | -1.038074 | 0.008949  | -3.333366 |
| C | 2.280384   | -2.569169 | -1.204548 | C  | -0.042421 | 1.393936  | -5.526623 |
| C | 2.179596   | -4.554851 | -2.516975 | H  | 1.844346  | 1.405439  | -4.482001 |
| C | 1.699013   | -1.811857 | -2.225816 | C  | -1.872349 | 0.289995  | -4.407069 |
| C | 1.613231   | -3.828462 | -3.560148 | H  | -1.430399 | -0.539949 | -2.476238 |
| H | 2.352332   | -5.620155 | -2.647487 | C  | -1.374240 | 0.989875  | -5.505340 |
| C | 1.381611   | -2.464557 | -3.419678 | H  | 0.346546  | 1.939471  | -6.383264 |
| H | 1.353044   | -4.329613 | -4.488948 | H  | -2.910734 | -0.035707 | -4.380980 |
| H | 0.931445   | -1.901745 | -4.235372 | H  | -2.025150 | 1.221889  | -6.344966 |

|              |           |           |           |   |           |           |           |
|--------------|-----------|-----------|-----------|---|-----------|-----------|-----------|
| C            | 2.899402  | 0.805669  | -2.106692 | H | 0.445715  | 4.684001  | -2.035190 |
| C            | 3.031156  | 2.079233  | -1.537816 | H | -0.625533 | 3.687752  | -1.064730 |
| C            | 3.974152  | 0.239693  | -2.798928 | C | 0.043487  | 5.497283  | -0.101060 |
| C            | 4.234733  | 2.767977  | -1.658846 | H | 0.456535  | 6.456360  | -0.423530 |
| H            | 2.185319  | 2.525805  | -1.004496 | C | -0.571160 | 5.459394  | 1.088608  |
| C            | 5.172983  | 0.936068  | -2.916600 | C | -0.706111 | 6.680952  | 1.944967  |
| H            | 3.873159  | -0.747274 | -3.249110 | H | -0.252843 | 7.561430  | 1.477170  |
| C            | 5.305346  | 2.197795  | -2.342468 | H | -1.762417 | 6.907285  | 2.149352  |
| H            | 4.337762  | 3.751207  | -1.202030 | H | -0.230401 | 6.531515  | 2.924885  |
| H            | 6.006372  | 0.490435  | -3.454900 | C | -1.149214 | 4.210029  | 1.682370  |
| H            | 6.246386  | 2.736557  | -2.427609 | H | -1.120813 | 3.353366  | 0.995663  |
| B            | -3.213744 | -1.033840 | -0.519672 | H | -0.599559 | 3.925866  | 2.592877  |
| O            | -3.228082 | -1.838703 | -1.626307 | H | -2.194089 | 4.366124  | 1.992313  |
| O            | -2.842330 | -1.685893 | 0.623165  | O | 0.403369  | 1.536386  | -1.453720 |
| C            | -3.066489 | -3.202243 | -1.159093 | C | 3.886832  | 1.031618  | -0.881905 |
| C            | -2.373989 | -3.001618 | 0.225725  | H | 4.317069  | 1.372340  | -1.827475 |
| C            | -4.464674 | -3.788836 | -1.048295 | C | 4.809989  | 0.234890  | 0.015301  |
| H            | -4.960944 | -3.706968 | -2.021700 | C | 6.176348  | 0.857187  | 0.121176  |
| H            | -4.435876 | -4.846881 | -0.764741 | C | 7.000545  | 0.993522  | -1.003595 |
| H            | -5.070365 | -3.246958 | -0.311358 | C | 6.642813  | 1.325826  | 1.353255  |
| C            | -2.248350 | -3.966765 | -2.178040 | C | 8.249656  | 1.583422  | -0.903695 |
| H            | -2.023432 | -4.977266 | -1.814152 | H | 6.660840  | 0.616625  | -1.965844 |
| H            | -2.817846 | -4.061877 | -3.109043 | C | 7.891841  | 1.916009  | 1.471054  |
| H            | -1.304291 | -3.459680 | -2.407348 | H | 6.009916  | 1.228461  | 2.233708  |
| C            | -2.773017 | -3.999038 | 1.292265  | C | 8.701911  | 2.049350  | 0.337653  |
| H            | -2.493151 | -5.016119 | 0.991205  | H | 8.884704  | 1.684264  | -1.779971 |
| H            | -2.245817 | -3.765575 | 2.224996  | H | 8.245145  | 2.279425  | 2.432593  |
| H            | -3.847657 | -3.976594 | 1.493360  | C | 9.989119  | 2.660068  | 0.445851  |
| C            | -0.860974 | -2.920561 | 0.130454  | N | 11.038027 | 3.157707  | 0.532986  |
| H            | -0.450849 | -2.665147 | 1.115622  | H | 2.206981  | 0.961278  | 0.374944  |
| H            | -0.420371 | -3.877417 | -0.178577 | H | 4.354075  | 0.204468  | 1.015470  |
| H            | -0.538852 | -2.142098 | -0.576400 | C | -4.727475 | -2.997340 | -2.913120 |
|              |           |           |           | C | -4.145768 | -3.000455 | -1.646223 |
| <b>45-ts</b> |           |           |           | C | -3.734562 | -1.772344 | -1.130562 |
| C            | 2.620924  | 1.320209  | -0.576801 | C | -3.880510 | -0.560491 | -1.810517 |
| C            | 1.657880  | 2.174608  | -1.363469 | C | -4.476337 | -0.601403 | -3.073109 |
| C            | 2.152640  | 2.474385  | -2.772922 | C | -4.895051 | -1.809826 | -3.618157 |
| H            | 1.389323  | 3.039119  | -3.320139 | H | -5.060324 | -3.931307 | -3.359170 |
| H            | 3.080456  | 3.059517  | -2.772430 | H | -4.596483 | 0.317947  | -3.641653 |
| H            | 2.331978  | 1.537403  | -3.316305 | H | -5.352365 | -1.827495 | -4.604098 |
| C            | 1.440740  | 3.459663  | -0.548157 | O | -3.157287 | -1.716692 | 0.116015  |
| H            | 1.252288  | 3.162990  | 0.496558  | C | -3.997732 | -4.229602 | -0.761437 |
| H            | 2.373880  | 4.043295  | -0.539844 | C | -2.714858 | -4.068113 | 0.041622  |
| C            | 0.268269  | 4.325387  | -1.011313 | C | -2.385204 | -2.789312 | 0.486883  |

|    |           |           |           |   |           |           |           |
|----|-----------|-----------|-----------|---|-----------|-----------|-----------|
| C  | -1.881182 | -5.114024 | 0.434690  | H | -0.354502 | -0.258741 | 4.582630  |
| C  | -1.291217 | -2.518002 | 1.313123  | C | 2.934575  | -1.366096 | 2.861713  |
| C  | -0.787709 | -4.882969 | 1.264500  | H | 1.797595  | -1.475557 | 1.044687  |
| H  | -2.089523 | -6.127888 | 0.102071  | C | 2.925667  | -1.064092 | 4.222055  |
| C  | -0.500779 | -3.597586 | 1.711801  | H | 1.731102  | -0.416611 | 5.892823  |
| H  | -0.157049 | -5.714057 | 1.570408  | H | 3.846114  | -1.698569 | 2.368786  |
| H  | 0.358751  | -3.428458 | 2.356606  | H | 3.839506  | -1.148358 | 4.805674  |
| P  | -3.149267 | 0.953351  | -1.068819 | C | -2.230649 | -0.282092 | 2.874296  |
| P  | -0.930223 | -0.755144 | 1.680482  | C | -2.457061 | 1.081491  | 3.076631  |
| C  | -5.179585 | -4.251930 | 0.229104  | C | -2.940770 | -1.217773 | 3.629719  |
| H  | -5.210357 | -3.342426 | 0.841449  | C | -3.357531 | 1.507566  | 4.047014  |
| H  | -6.127572 | -4.329034 | -0.318027 | H | -1.922194 | 1.808520  | 2.464794  |
| H  | -5.092821 | -5.114094 | 0.902358  | C | -3.860976 | -0.790240 | 4.582355  |
| C  | -4.010905 | -5.522807 | -1.566913 | H | -2.768958 | -2.282904 | 3.477713  |
| H  | -3.932275 | -6.391639 | -0.904683 | C | -4.062022 | 0.570797  | 4.798297  |
| H  | -4.957123 | -5.633443 | -2.107140 | H | -3.520284 | 2.571744  | 4.204984  |
| H  | -3.189131 | -5.560680 | -2.291604 | H | -4.415524 | -1.522332 | 5.164898  |
| Cu | -1.048096 | 0.323435  | -0.305015 | H | -4.775935 | 0.902565  | 5.548833  |
| C  | -3.315111 | 2.185728  | -2.411698 | B | 4.808941  | -1.247445 | -0.529570 |
| C  | -4.542757 | 2.770617  | -2.747836 | O | 3.903270  | -2.164887 | -0.072334 |
| C  | -2.169906 | 2.519960  | -3.140671 | O | 5.629640  | -1.735322 | -1.505864 |
| C  | -4.622255 | 3.675463  | -3.799155 | C | 4.270902  | -3.443367 | -0.642657 |
| H  | -5.438419 | 2.513465  | -2.182816 | C | 5.075532  | -3.016265 | -1.908465 |
| C  | -2.255348 | 3.428202  | -4.193841 | C | 5.117568  | -4.153779 | 0.403040  |
| H  | -1.207505 | 2.090737  | -2.855822 | H | 4.537328  | -4.228201 | 1.330112  |
| C  | -3.477349 | 4.004171  | -4.523880 | H | 5.386273  | -5.167501 | 0.085778  |
| H  | -5.578509 | 4.125865  | -4.055264 | H | 6.038734  | -3.600978 | 0.621952  |
| H  | -1.359816 | 3.690513  | -4.753433 | C | 3.009672  | -4.235039 | -0.912644 |
| H  | -3.541036 | 4.715210  | -5.344494 | H | 3.252939  | -5.211959 | -1.348457 |
| C  | -4.404139 | 1.514406  | 0.145913  | H | 2.480756  | -4.404604 | 0.034141  |
| C  | -4.314111 | 2.833099  | 0.608236  | H | 2.328187  | -3.709907 | -1.587574 |
| C  | -5.394464 | 0.679697  | 0.667258  | C | 6.210070  | -3.943840 | -2.285020 |
| C  | -5.203708 | 3.311182  | 1.561694  | H | 5.824834  | -4.944040 | -2.519539 |
| H  | -3.547964 | 3.498235  | 0.206383  | H | 6.718488  | -3.561206 | -3.176556 |
| C  | -6.276845 | 1.156481  | 1.633985  | H | 6.948323  | -4.032720 | -1.482962 |
| H  | -5.486980 | -0.346268 | 0.314673  | C | 4.193626  | -2.742497 | -3.116619 |
| C  | -6.184795 | 2.469544  | 2.082362  | H | 4.799756  | -2.267879 | -3.895659 |
| H  | -5.127527 | 4.341853  | 1.902875  | H | 3.773537  | -3.668885 | -3.524913 |
| H  | -7.041099 | 0.494931  | 2.035763  | H | 3.366412  | -2.065386 | -2.867713 |
| H  | -6.878047 | 2.839196  | 2.834510  | O | -0.242294 | -0.688349 | -1.987538 |
| C  | 0.571647  | -0.855907 | 2.724795  | C | 0.701490  | -1.657744 | -1.694799 |
| C  | 0.568533  | -0.561340 | 4.090912  | H | 1.042003  | -2.203905 | -2.599772 |
| C  | 1.770040  | -1.243866 | 2.111492  | H | 1.620059  | -1.234633 | -1.227680 |
| C  | 1.744358  | -0.655215 | 4.831852  | H | 0.324682  | -2.435658 | -0.996863 |



|           |           |           |           |           |           |           |           |
|-----------|-----------|-----------|-----------|-----------|-----------|-----------|-----------|
| H         | 0.344207  | 0.544010  | -1.886108 | B         | -2.269785 | -0.905643 | -0.409023 |
|           |           |           |           | O         | -3.293735 | -1.013194 | -1.308300 |
| <b>46</b> |           |           |           | O         | -2.520878 | -1.517562 | 0.784806  |
| C         | 1.386673  | -0.938693 | -0.488707 | C         | -4.436342 | -1.514009 | -0.566265 |
| C         | 2.617671  | -1.448310 | 0.215092  | C         | -3.754861 | -2.262595 | 0.618629  |
| C         | 2.367011  | -1.814048 | 1.670296  | C         | -5.234166 | -0.296171 | -0.126027 |
| H         | 3.255771  | -2.293869 | 2.091563  | H         | -5.492858 | 0.295902  | -1.011073 |
| H         | 2.130980  | -0.930550 | 2.276360  | H         | -6.164004 | -0.584803 | 0.376608  |
| H         | 1.531495  | -2.519937 | 1.755968  | H         | -4.655460 | 0.342082  | 0.552846  |
| C         | 3.707607  | -0.382134 | 0.071141  | C         | -5.269856 | -2.387564 | -1.477650 |
| H         | 3.831117  | -0.174480 | -1.002360 | H         | -6.094080 | -2.848434 | -0.919578 |
| H         | 3.335672  | 0.548192  | 0.528277  | H         | -5.703583 | -1.777606 | -2.277391 |
| C         | 5.067964  | -0.746319 | 0.664151  | H         | -4.672740 | -3.179922 | -1.937411 |
| H         | 4.963465  | -0.882261 | 1.752026  | C         | -4.526487 | -2.228506 | 1.919865  |
| H         | 5.389282  | -1.713581 | 0.259846  | H         | -5.503082 | -2.713703 | 1.800035  |
| C         | 6.075200  | 0.328035  | 0.403663  | H         | -3.972391 | -2.773642 | 2.691674  |
| H         | 5.797324  | 1.314244  | 0.790615  | H         | -4.685057 | -1.205850 | 2.273353  |
| C         | 7.241595  | 0.236152  | -0.248551 | C         | -3.362439 | -3.691476 | 0.276923  |
| C         | 8.124036  | 1.435654  | -0.423585 | H         | -2.710591 | -4.078576 | 1.067279  |
| H         | 7.692458  | 2.335509  | 0.027368  | H         | -4.241775 | -4.341579 | 0.207998  |
| H         | 9.112322  | 1.267217  | 0.027557  | H         | -2.815781 | -3.743931 | -0.671766 |
| H         | 8.305607  | 1.639418  | -1.488459 | H         | 2.414710  | -3.266770 | -0.452718 |
| C         | 7.791257  | -1.020275 | -0.852202 |           |           |           |           |
| H         | 7.133830  | -1.885914 | -0.735799 | <b>47</b> |           |           |           |
| H         | 7.979645  | -0.879741 | -1.925681 | C         | -0.978154 | 2.224881  | -0.099672 |
| H         | 8.762395  | -1.270129 | -0.402401 | C         | -0.367025 | 3.109919  | 0.963742  |
| O         | 3.103118  | -2.592505 | -0.493431 | C         | -0.820491 | 2.773378  | 2.378444  |
| C         | 0.217231  | -0.613541 | 0.060306  | H         | -0.245960 | 3.370438  | 3.093957  |
| H         | 0.067891  | -0.734095 | 1.136234  | H         | -1.885587 | 2.992934  | 2.523185  |
| C         | -0.954039 | -0.078722 | -0.703548 | H         | -0.656587 | 1.716663  | 2.623547  |
| C         | -1.273228 | 1.376004  | -0.399025 | C         | -0.718131 | 4.557867  | 0.601570  |
| C         | -0.554284 | 2.115470  | 0.544599  | H         | -0.316790 | 4.742969  | -0.406020 |
| C         | -2.323354 | 2.004988  | -1.084038 | H         | -1.811311 | 4.654798  | 0.531525  |
| C         | -0.871327 | 3.440883  | 0.805427  | C         | -0.151053 | 5.610622  | 1.559063  |
| H         | 0.277179  | 1.653289  | 1.072698  | H         | -0.714269 | 5.594655  | 2.501801  |
| C         | -2.646892 | 3.327954  | -0.838894 | H         | 0.880178  | 5.332602  | 1.811664  |
| H         | -2.894322 | 1.434679  | -1.815091 | C         | -0.196408 | 6.990069  | 0.971656  |
| C         | -1.920889 | 4.054756  | 0.114382  | H         | -1.087938 | 7.584277  | 1.186689  |
| H         | -0.305360 | 4.007870  | 1.540122  | C         | 0.734830  | 7.531299  | 0.175133  |
| H         | -3.459616 | 3.807936  | -1.377945 | C         | 0.579829  | 8.910882  | -0.387662 |
| C         | -2.250371 | 5.420042  | 0.376627  | H         | -0.351405 | 9.385812  | -0.061178 |
| N         | -2.520524 | 6.532230  | 0.589602  | H         | 1.417616  | 9.556117  | -0.087136 |
| H         | 1.522715  | -0.815020 | -1.568191 | H         | 0.587990  | 8.891565  | -1.486667 |
| H         | -0.754856 | -0.148691 | -1.784910 | C         | 1.991117  | 6.824708  | -0.237784 |

|   |           |           |           |    |           |           |           |
|---|-----------|-----------|-----------|----|-----------|-----------|-----------|
| H | 2.087315  | 5.824335  | 0.196655  | C  | 1.612485  | -3.107263 | 0.519427  |
| H | 2.027274  | 6.718397  | -1.331510 | C  | 0.728909  | -2.757363 | 1.542482  |
| H | 2.878711  | 7.409876  | 0.041660  | C  | 0.065930  | -3.784835 | 2.210898  |
| O | 1.063738  | 3.047393  | 0.888221  | C  | 0.274640  | -5.108152 | 1.831347  |
| C | -1.965257 | 1.314845  | 0.099467  | H  | 1.295950  | -6.459334 | 0.519499  |
| H | -2.228718 | 1.072404  | 1.133163  | H  | -0.625529 | -3.547719 | 3.017721  |
| C | -2.817572 | 0.709695  | -0.959581 | H  | -0.248688 | -5.907277 | 2.350089  |
| C | -4.265958 | 0.906631  | -0.653761 | O  | 2.284848  | -2.062323 | -0.060570 |
| C | -4.812732 | 0.579878  | 0.597926  | C  | 2.923045  | -4.670062 | -0.933787 |
| C | -5.133875 | 1.392314  | -1.641302 | C  | 2.974750  | -3.470144 | -1.873032 |
| C | -6.164198 | 0.736560  | 0.856261  | C  | 2.686462  | -2.205647 | -1.361754 |
| H | -4.167800 | 0.173169  | 1.374533  | C  | 3.359201  | -3.533644 | -3.211991 |
| C | -6.488423 | 1.551834  | -1.401492 | C  | 2.759279  | -1.031016 | -2.113446 |
| H | -4.729163 | 1.644371  | -2.620189 | C  | 3.464859  | -2.381954 | -3.987544 |
| C | -7.014960 | 1.225940  | -0.144655 | H  | 3.587944  | -4.495896 | -3.663543 |
| H | -6.572873 | 0.476656  | 1.830260  | C  | 3.169610  | -1.137112 | -3.443760 |
| H | -7.147347 | 1.931321  | -2.178596 | H  | 3.775107  | -2.458074 | -5.026309 |
| C | -8.408229 | 1.392760  | 0.115867  | H  | 3.225943  | -0.244764 | -4.064075 |
| N | -9.545412 | 1.529043  | 0.328707  | P  | 0.551623  | -0.967685 | 1.881397  |
| H | -2.590059 | 1.200336  | -1.918835 | P  | 2.156400  | 0.537232  | -1.363012 |
| B | -2.480633 | -0.914444 | -1.231595 | C  | 4.279597  | -4.767530 | -0.208341 |
| O | -3.273432 | -1.488503 | -2.292727 | H  | 4.497287  | -3.857214 | 0.365165  |
| O | -2.727665 | -1.732083 | -0.056708 | H  | 4.275373  | -5.615449 | 0.488108  |
| C | -4.069019 | -2.561488 | -1.817632 | H  | 5.087601  | -4.915226 | -0.935951 |
| C | -3.471747 | -2.891595 | -0.394256 | C  | 2.671410  | -5.969385 | -1.692279 |
| C | -5.527237 | -2.107964 | -1.778297 | H  | 3.475585  | -6.166750 | -2.408668 |
| H | -5.790207 | -1.715283 | -2.768118 | H  | 2.655801  | -6.822758 | -1.006618 |
| H | -6.207011 | -2.937868 | -1.547130 | H  | 1.718920  | -5.940941 | -2.234623 |
| H | -5.690606 | -1.308886 | -1.050806 | Cu | 0.146143  | 0.168864  | -0.152106 |
| C | -3.977594 | -3.713769 | -2.810893 | C  | -0.652529 | -0.911585 | 3.263649  |
| H | -4.544290 | -4.586668 | -2.460532 | C  | -0.280233 | -0.604591 | 4.575044  |
| H | -4.406347 | -3.397725 | -3.769567 | C  | -2.004613 | -1.134559 | 2.964520  |
| H | -2.943068 | -4.022655 | -2.991808 | C  | -1.246163 | -0.517256 | 5.574651  |
| C | -4.519139 | -3.120567 | 0.688744  | H  | 0.764974  | -0.425177 | 4.820230  |
| H | -5.148027 | -3.991444 | 0.461520  | C  | -2.960617 | -1.062098 | 3.972798  |
| H | -4.010272 | -3.314274 | 1.642957  | H  | -2.303979 | -1.374983 | 1.939528  |
| H | -5.164454 | -2.245026 | 0.820317  | C  | -2.585492 | -0.746809 | 5.277275  |
| C | -2.530298 | -4.094376 | -0.387453 | H  | -0.947278 | -0.271727 | 6.591093  |
| H | -2.074968 | -4.175738 | 0.607408  | H  | -4.006780 | -1.249582 | 3.733995  |
| H | -3.057914 | -5.033344 | -0.597538 | H  | -3.337039 | -0.678441 | 6.060329  |
| H | -1.716825 | -3.984187 | -1.112141 | C  | 2.148139  | -0.576673 | 2.709457  |
| H | 1.299250  | 2.119331  | 0.741392  | C  | 2.490060  | 0.764717  | 2.914967  |
| C | 1.147183  | -5.417360 | 0.792330  | C  | 3.014007  | -1.572699 | 3.171412  |
| C | 1.848523  | -4.417278 | 0.115455  | C  | 3.667466  | 1.101284  | 3.574078  |

|              |           |           |           |   |           |           |           |
|--------------|-----------|-----------|-----------|---|-----------|-----------|-----------|
| H            | 1.832649  | 1.565095  | 2.576888  | H | -0.229361 | 4.689058  | -0.283053 |
| C            | 4.199313  | -1.233540 | 3.817178  | H | -1.698928 | 4.592350  | 0.688946  |
| H            | 2.762708  | -2.622834 | 3.028331  | C | -0.032911 | 5.560357  | 1.678289  |
| C            | 4.527239  | 0.103105  | 4.021674  | H | -0.476971 | 5.430920  | 2.678060  |
| H            | 3.915259  | 2.148661  | 3.729505  | H | 1.045024  | 5.395224  | 1.794319  |
| H            | 4.864126  | -2.019356 | 4.168591  | C | -0.333622 | 6.940072  | 1.186315  |
| H            | 5.451952  | 0.366603  | 4.530106  | H | -1.400341 | 7.155636  | 1.062775  |
| C            | 1.889084  | 1.589102  | -2.833456 | C | 0.525679  | 7.913656  | 0.858088  |
| C            | 0.606126  | 1.550628  | -3.394635 | C | 0.036400  | 9.238762  | 0.354565  |
| C            | 2.885278  | 2.355360  | -3.445568 | H | -1.056449 | 9.282885  | 0.300458  |
| C            | 0.325510  | 2.276182  | -4.548108 | H | 0.380738  | 10.058800 | 1.000846  |
| H            | -0.167273 | 0.937223  | -2.925865 | H | 0.437732  | 9.450815  | -0.646728 |
| C            | 2.596957  | 3.086467  | -4.594066 | C | 2.017820  | 7.810588  | 0.951092  |
| H            | 3.890057  | 2.380400  | -3.027265 | H | 2.368797  | 6.836019  | 1.300828  |
| C            | 1.318276  | 3.048836  | -5.144335 | H | 2.478354  | 8.004901  | -0.027664 |
| H            | -0.672299 | 2.240331  | -4.978986 | H | 2.415087  | 8.576514  | 1.632100  |
| H            | 3.375507  | 3.683446  | -5.063050 | O | 1.175164  | 2.985571  | 1.056795  |
| H            | 1.095785  | 3.622550  | -6.040948 | C | -2.115163 | 1.609055  | 0.081379  |
| C            | 3.650200  | 1.206126  | -0.531372 | H | -2.575820 | 1.577825  | 1.076556  |
| C            | 3.772615  | 2.583862  | -0.311825 | C | -2.899402 | 1.067250  | -0.964690 |
| C            | 4.626067  | 0.347633  | -0.014184 | C | -4.342691 | 1.193363  | -0.961969 |
| C            | 4.853388  | 3.089706  | 0.402570  | C | -5.077365 | 1.804421  | 0.081121  |
| H            | 3.014145  | 3.266046  | -0.690614 | C | -5.087047 | 0.704697  | -2.061305 |
| C            | 5.704175  | 0.857648  | 0.700899  | C | -6.456310 | 1.878101  | 0.053556  |
| H            | 4.548079  | -0.727459 | -0.167991 | H | -4.552006 | 2.244465  | 0.926073  |
| C            | 5.820976  | 2.228272  | 0.911232  | C | -6.462967 | 0.780841  | -2.103557 |
| H            | 4.936823  | 4.162865  | 0.559791  | H | -4.548637 | 0.229902  | -2.879079 |
| H            | 6.453766  | 0.176988  | 1.098342  | C | -7.173638 | 1.361075  | -1.036992 |
| H            | 6.664625  | 2.624338  | 1.471717  | H | -6.994325 | 2.354076  | 0.870570  |
| C            | -0.482111 | -1.953970 | -2.298340 | H | -7.008519 | 0.388888  | -2.959369 |
| H            | -0.111219 | -2.728002 | -1.605779 | C | -8.592931 | 1.441555  | -1.071952 |
| H            | 0.359741  | -1.625074 | -2.923280 | N | -9.757615 | 1.505332  | -1.099733 |
| H            | -1.240467 | -2.408230 | -2.948130 | H | -2.459885 | 1.112093  | -1.967408 |
| O            | -1.022958 | -0.853210 | -1.612286 | B | -2.416774 | -1.133423 | -0.775634 |
| H            | -0.759225 | 2.543435  | -1.125523 | O | -3.388096 | -1.751196 | -1.565036 |
|              |           |           |           | O | -2.553208 | -1.484393 | 0.569025  |
| <b>48-ts</b> |           |           |           | C | -3.902263 | -2.835191 | -0.775299 |
| C            | -0.833908 | 2.141563  | 0.007781  | C | -3.726020 | -2.310046 | 0.683885  |
| C            | -0.263076 | 3.046538  | 1.086315  | C | -5.334127 | -3.113915 | -1.182544 |
| C            | -0.734884 | 2.692155  | 2.491104  | H | -5.358623 | -3.483717 | -2.214144 |
| H            | -0.153143 | 3.255412  | 3.228494  | H | -5.777588 | -3.883048 | -0.537540 |
| H            | -1.795952 | 2.927291  | 2.644606  | H | -5.950389 | -2.210742 | -1.129290 |
| H            | -0.591151 | 1.623192  | 2.692296  | C | -3.026214 | -4.050296 | -1.069440 |
| C            | -0.602475 | 4.499878  | 0.735296  | H | -3.392021 | -4.954781 | -0.568229 |

|    |           |           |           |   |           |           |           |
|----|-----------|-----------|-----------|---|-----------|-----------|-----------|
| H  | -3.032122 | -4.230288 | -2.151075 | C | -1.568098 | -0.810822 | 3.431670  |
| H  | -1.986311 | -3.880471 | -0.755705 | C | -0.394117 | -1.812749 | 5.749707  |
| C  | -4.886737 | -1.448239 | 1.155428  | H | 1.374659  | -2.091193 | 4.562315  |
| H  | -5.750449 | -2.061465 | 1.439426  | C | -2.301004 | -0.874689 | 4.614282  |
| H  | -4.565064 | -0.878711 | 2.037771  | H | -2.030733 | -0.446234 | 2.516304  |
| H  | -5.201930 | -0.731619 | 0.394105  | C | -1.716218 | -1.374552 | 5.773330  |
| C  | -3.470338 | -3.398060 | 1.709512  | H | 0.067491  | -2.203706 | 6.653514  |
| H  | -3.328070 | -2.945447 | 2.699561  | H | -3.333589 | -0.531775 | 4.627375  |
| H  | -4.331592 | -4.076243 | 1.766768  | H | -2.288611 | -1.420817 | 6.696875  |
| H  | -2.578064 | -3.984235 | 1.473013  | C | 2.417375  | -0.961281 | 2.448711  |
| H  | 1.404890  | 2.046477  | 0.991115  | C | 2.807151  | 0.320793  | 2.849043  |
| C  | 0.630525  | -5.457875 | 0.080485  | C | 3.326454  | -2.015189 | 2.571358  |
| C  | 1.379351  | -4.456877 | -0.541052 | C | 4.078989  | 0.543898  | 3.364487  |
| C  | 1.385127  | -3.204640 | 0.067087  | H | 2.108834  | 1.156181  | 2.770192  |
| C  | 0.690794  | -2.910507 | 1.243356  | C | 4.602256  | -1.789618 | 3.080121  |
| C  | -0.020378 | -3.944877 | 1.848583  | H | 3.036124  | -3.021673 | 2.270994  |
| C  | -0.055410 | -5.208760 | 1.265025  | C | 4.981183  | -0.510338 | 3.474328  |
| H  | 0.591820  | -6.453557 | -0.355299 | H | 4.370205  | 1.547900  | 3.664880  |
| H  | -0.564955 | -3.755265 | 2.771704  | H | 5.301488  | -2.618105 | 3.168705  |
| H  | -0.622533 | -6.006340 | 1.739255  | H | 5.980447  | -0.333601 | 3.866186  |
| O  | 2.120780  | -2.176778 | -0.463782 | C | 2.030344  | 1.872051  | -2.657029 |
| C  | 2.267180  | -4.678404 | -1.758497 | C | 0.777303  | 2.050149  | -3.254210 |
| C  | 2.363396  | -3.368895 | -2.529377 | C | 3.113488  | 2.626841  | -3.116349 |
| C  | 2.325504  | -2.171939 | -1.816722 | C | 0.607545  | 2.964811  | -4.287616 |
| C  | 2.575945  | -3.277213 | -3.904675 | H | -0.071457 | 1.458826  | -2.910648 |
| C  | 2.483884  | -0.915910 | -2.407138 | C | 2.941096  | 3.548145  | -4.145248 |
| C  | 2.763806  | -2.045008 | -4.524986 | H | 4.097670  | 2.493471  | -2.670968 |
| H  | 2.609016  | -4.181316 | -4.507271 | C | 1.690327  | 3.718633  | -4.731546 |
| C  | 2.723473  | -0.870405 | -3.782709 | H | -0.372128 | 3.092422  | -4.741716 |
| H  | 2.940999  | -2.002127 | -5.596395 | H | 3.790553  | 4.131623  | -4.492394 |
| H  | 2.847479  | 0.091275  | -4.276793 | H | 1.559092  | 4.440124  | -5.534335 |
| P  | 0.701659  | -1.172262 | 1.822929  | C | 3.793096  | 0.906522  | -0.586856 |
| P  | 2.169049  | 0.570026  | -1.373974 | C | 4.026755  | 2.164888  | -0.015789 |
| C  | 3.679224  | -5.036557 | -1.254044 | C | 4.792459  | -0.067249 | -0.517833 |
| H  | 4.090736  | -4.243025 | -0.616821 | C | 5.245465  | 2.444161  | 0.591763  |
| H  | 3.646834  | -5.963059 | -0.666962 | H | 3.256326  | 2.933818  | -0.057270 |
| H  | 4.360387  | -5.182240 | -2.101918 | C | 6.002953  | 0.210734  | 0.110122  |
| C  | 1.748991  | -5.814103 | -2.634898 | H | 4.628808  | -1.052087 | -0.952677 |
| H  | 2.409990  | -5.977213 | -3.492288 | C | 6.235214  | 1.467366  | 0.658730  |
| H  | 1.729499  | -6.757065 | -2.079051 | H | 5.418359  | 3.429111  | 1.019702  |
| H  | 0.738381  | -5.607319 | -3.007313 | H | 6.768091  | -0.560290 | 0.166202  |
| Cu | 0.220670  | 0.254835  | 0.020678  | H | 7.185428  | 1.684673  | 1.141454  |
| C  | -0.240987 | -1.249793 | 3.399637  | C | -0.956052 | -1.212357 | -2.667839 |
| C  | 0.340482  | -1.749388 | 4.571161  | H | -1.188098 | -2.257320 | -2.913119 |

|           |           |           |           |    |           |           |           |
|-----------|-----------|-----------|-----------|----|-----------|-----------|-----------|
| H         | 0.079659  | -1.005780 | -2.952499 | N  | -5.216844 | 5.957858  | -3.374506 |
| H         | -1.624395 | -0.568225 | -3.259266 | H  | 0.374673  | 1.159267  | -2.795437 |
| O         | -1.105218 | -0.980916 | -1.279623 | H  | 2.674962  | -0.121436 | 0.977510  |
| H         | -0.501114 | 2.439695  | -0.994106 | C  | -5.416659 | -0.110485 | 1.128902  |
| <b>49</b> |           |           |           | C  | -4.481050 | -1.030109 | 0.656330  |
| C         | 2.235975  | 1.296443  | -0.769994 | C  | -3.138641 | -0.724627 | 0.863792  |
| C         | 3.281099  | 1.574930  | 0.282453  | C  | -2.698339 | 0.420745  | 1.527107  |
| C         | 2.891159  | 2.681459  | 1.255053  | C  | -3.665220 | 1.304614  | 2.008713  |
| H         | 3.618330  | 2.721658  | 2.072563  | C  | -5.015188 | 1.043060  | 1.797900  |
| H         | 2.870447  | 3.665416  | 0.768418  | H  | -6.478254 | -0.297215 | 0.986454  |
| H         | 1.904424  | 2.493732  | 1.698229  | H  | -3.358664 | 2.203569  | 2.539471  |
| C         | 4.617532  | 1.883843  | -0.401375 | H  | -5.763343 | 1.739970  | 2.166350  |
| H         | 4.845100  | 1.035807  | -1.064831 | O  | -2.161033 | -1.586006 | 0.432895  |
| H         | 4.491555  | 2.764692  | -1.048734 | C  | -4.815120 | -2.378641 | 0.033193  |
| C         | 5.797192  | 2.091403  | 0.553512  | C  | -3.732081 | -2.703178 | -0.986942 |
| H         | 5.689575  | 3.056441  | 1.067514  | C  | -2.429200 | -2.292177 | -0.710336 |
| H         | 5.747754  | 1.321050  | 1.334049  | C  | -3.925898 | -3.451990 | -2.146451 |
| C         | 7.118919  | 2.046368  | -0.153389 | C  | -1.338407 | -2.568329 | -1.536191 |
| H         | 7.518385  | 3.000772  | -0.506092 | C  | -2.855827 | -3.781195 | -2.974684 |
| C         | 7.825132  | 0.941115  | -0.425963 | H  | -4.923634 | -3.796492 | -2.407332 |
| C         | 9.130316  | 1.006298  | -1.158855 | C  | -1.570647 | -3.344934 | -2.674717 |
| H         | 9.408700  | 2.034693  | -1.412946 | H  | -3.028567 | -4.379370 | -3.865479 |
| H         | 9.941803  | 0.570758  | -0.558292 | H  | -0.744250 | -3.590183 | -3.338603 |
| H         | 9.092359  | 0.421978  | -2.089325 | P  | -0.889366 | 0.646386  | 1.686811  |
| C         | 7.393154  | -0.442593 | -0.042416 | P  | 0.273617  | -1.793185 | -1.129288 |
| H         | 6.415157  | -0.473155 | 0.448434  | C  | -4.750959 | -3.441242 | 1.148784  |
| H         | 7.339684  | -1.084647 | -0.933152 | H  | -3.765431 | -3.456481 | 1.631254  |
| H         | 8.129730  | -0.910768 | 0.626093  | H  | -5.505091 | -3.229365 | 1.917126  |
| O         | 3.508003  | 0.366124  | 1.041088  | H  | -4.944960 | -4.437895 | 0.732786  |
| C         | 1.167524  | 2.155230  | -1.067917 | C  | -6.207612 | -2.393520 | -0.585811 |
| H         | 0.997371  | 2.987531  | -0.379756 | H  | -6.441186 | -3.382468 | -0.994054 |
| C         | 0.209386  | 1.965701  | -2.079740 | H  | -6.969595 | -2.185399 | 0.172877  |
| C         | -0.902570 | 2.832879  | -2.339295 | H  | -6.304283 | -1.652801 | -1.388188 |
| C         | -1.041624 | 4.122394  | -1.765621 | Cu | 0.323561  | 0.354734  | -0.251955 |
| C         | -1.922890 | 2.421386  | -3.233615 | C  | -0.744966 | 2.309741  | 2.429569  |
| C         | -2.140998 | 4.914740  | -2.022937 | C  | -0.312167 | 2.543018  | 3.735683  |
| H         | -0.252828 | 4.512436  | -1.124370 | C  | -1.007507 | 3.397220  | 1.588039  |
| C         | -3.019391 | 3.210004  | -3.501503 | C  | -0.129403 | 3.849255  | 4.185423  |
| H         | -1.836436 | 1.440474  | -3.701581 | H  | -0.106428 | 1.705938  | 4.400306  |
| C         | -3.154702 | 4.471659  | -2.890466 | C  | -0.835508 | 4.697991  | 2.041702  |
| H         | -2.221311 | 5.899872  | -1.567270 | H  | -1.349486 | 3.221922  | 0.566427  |
| H         | -3.791342 | 2.861697  | -4.184255 | C  | -0.385638 | 4.925175  | 3.341746  |
| C         | -4.286266 | 5.287724  | -3.156837 | H  | 0.214828  | 4.024501  | 5.201965  |
|           |           |           |           | H  | -1.048750 | 5.534226  | 1.378204  |

|              |           |           |           |   |            |           |           |
|--------------|-----------|-----------|-----------|---|------------|-----------|-----------|
| H            | -0.238161 | 5.942015  | 3.697515  | H | -6.019059  | 0.195544  | -0.995252 |
| C            | -0.438513 | -0.503437 | 3.040925  | H | -5.420790  | -1.452339 | -1.174704 |
| C            | 0.919736  | -0.689070 | 3.323392  | C | -7.230650  | -1.275130 | 0.015835  |
| C            | -1.392341 | -1.201075 | 3.785812  | H | -7.122370  | -2.307488 | 0.376930  |
| C            | 1.315429  | -1.554186 | 4.336607  | H | -7.545433  | -0.680097 | 0.882919  |
| H            | 1.675998  | -0.142920 | 2.757702  | C | -8.268670  | -1.227927 | -1.065606 |
| C            | -0.992750 | -2.075758 | 4.792467  | H | -8.390430  | -2.131017 | -1.669216 |
| H            | -2.452908 | -1.064328 | 3.578791  | C | -9.022207  | -0.165615 | -1.379196 |
| C            | 0.359296  | -2.253459 | 5.068902  | C | -10.019493 | -0.212837 | -2.496140 |
| H            | 2.374281  | -1.691422 | 4.544148  | H | -10.044214 | -1.192934 | -2.984428 |
| H            | -1.742993 | -2.617430 | 5.363776  | H | -11.031840 | 0.012744  | -2.131130 |
| H            | 0.669417  | -2.938711 | 5.854382  | H | -9.795314  | 0.545182  | -3.260190 |
| C            | 1.243577  | -2.138673 | -2.645607 | C | -8.942012  | 1.151113  | -0.666355 |
| C            | 0.940820  | -1.386437 | -3.787984 | H | -8.171405  | 1.177611  | 0.110727  |
| C            | 2.239666  | -3.114558 | -2.722759 | H | -8.723366  | 1.957587  | -1.380627 |
| C            | 1.622502  | -1.601187 | -4.979367 | H | -9.907016  | 1.406303  | -0.205703 |
| H            | 0.141516  | -0.645699 | -3.751066 | O | -5.468599  | 0.526745  | 1.476316  |
| C            | 2.927708  | -3.323506 | -3.915623 | C | -2.619857  | -0.767987 | -0.551384 |
| H            | 2.482707  | -3.718198 | -1.850789 | H | -2.642899  | -1.823964 | -0.262032 |
| C            | 2.623558  | -2.567982 | -5.042817 | C | -1.602854  | -0.392610 | -1.403420 |
| H            | 1.371890  | -1.012890 | -5.858655 | C | -0.675362  | -1.319605 | -2.040645 |
| H            | 3.701706  | -4.085811 | -3.962807 | C | -0.433486  | -2.626604 | -1.568243 |
| H            | 3.162100  | -2.733882 | -5.972653 | C | 0.008531   | -0.912208 | -3.201805 |
| C            | 1.009224  | -2.871305 | 0.155173  | C | 0.443085   | -3.473857 | -2.215826 |
| C            | 2.337481  | -2.623233 | 0.526929  | H | -0.924075  | -2.979885 | -0.662108 |
| C            | 0.281562  | -3.841064 | 0.846175  | C | 0.887366   | -1.751938 | -3.859692 |
| C            | 2.925760  | -3.330342 | 1.567380  | H | -0.161771  | 0.092072  | -3.588003 |
| H            | 2.922506  | -1.874399 | -0.008199 | C | 1.117724   | -3.045740 | -3.369717 |
| C            | 0.872705  | -4.547498 | 1.891573  | H | 0.631583   | -4.470565 | -1.823184 |
| H            | -0.750189 | -4.053756 | 0.569564  | H | 1.405021   | -1.413586 | -4.755098 |
| C            | 2.190671  | -4.293454 | 2.255398  | C | 2.041466   | -3.909038 | -4.025195 |
| H            | 3.957885  | -3.122816 | 1.841955  | N | 2.809401   | -4.606144 | -4.558639 |
| H            | 0.296163  | -5.301074 | 2.423101  | H | -1.648470  | 0.603159  | -1.854548 |
| H            | 2.645265  | -4.842639 | 3.076633  | H | -4.845831  | 0.718960  | 2.188310  |
| H            | 2.562925  | 0.601092  | -1.552739 | C | 4.030467   | -3.263142 | -1.231310 |
|              |           |           |           | C | 3.822208   | -1.887066 | -1.305453 |
| <b>50-ts</b> |           |           |           | C | 2.942213   | -1.328088 | -0.380906 |
| C            | -3.566043 | 0.087697  | 0.096906  | C | 2.261844   | -2.066644 | 0.590015  |
| C            | -4.859858 | -0.481894 | 0.658673  | C | 2.506591   | -3.441249 | 0.637071  |
| C            | -4.611279 | -1.722063 | 1.513043  | C | 3.384817   | -4.031165 | -0.265992 |
| H            | -5.521563 | -1.993103 | 2.058503  | H | 4.705692   | -3.748083 | -1.932019 |
| H            | -4.309787 | -2.590724 | 0.912021  | H | 1.990238   | -4.057531 | 1.369650  |
| H            | -3.819539 | -1.524072 | 2.249938  | H | 3.563987   | -5.102512 | -0.222300 |
| C            | -5.870855 | -0.751810 | -0.454562 | O | 2.698988   | 0.023324  | -0.401474 |

|    |           |           |           |              |           |          |           |
|----|-----------|-----------|-----------|--------------|-----------|----------|-----------|
| C  | 4.530375  | -0.943911 | -2.269111 | C            | -1.545050 | 3.488426 | -1.005630 |
| C  | 3.545479  | 0.158311  | -2.636164 | C            | 0.447446  | 4.826208 | -1.254860 |
| C  | 2.700958  | 0.626764  | -1.633498 | C            | -2.322846 | 4.564221 | -1.425043 |
| C  | 3.467870  | 0.792184  | -3.875930 | H            | -2.018269 | 2.550251 | -0.715279 |
| C  | 1.834204  | 1.709285  | -1.792344 | C            | -0.328840 | 5.899907 | -1.674360 |
| C  | 2.595227  | 1.857722  | -4.081505 | H            | 1.528973  | 4.936092 | -1.175706 |
| H  | 4.097805  | 0.456720  | -4.696419 | C            | -1.714147 | 5.768340 | -1.762101 |
| C  | 1.792454  | 2.325078  | -3.044456 | H            | -3.403948 | 4.461901 | -1.479770 |
| H  | 2.550630  | 2.337501  | -5.055889 | H            | 0.146156  | 6.844535 | -1.928553 |
| H  | 1.124238  | 3.167468  | -3.210331 | H            | -2.319172 | 6.612069 | -2.085444 |
| P  | 0.985715  | -1.192950 | 1.578198  | C            | 2.029738  | 2.927631 | 0.788054  |
| P  | 0.806095  | 2.158677  | -0.344870 | C            | 1.629308  | 3.170829 | 2.105483  |
| C  | 5.710483  | -0.292344 | -1.520645 | C            | 3.323612  | 3.279885 | 0.394197  |
| H  | 5.372515  | 0.246799  | -0.626794 | C            | 2.497291  | 3.780372 | 3.004134  |
| H  | 6.427553  | -1.061235 | -1.206641 | H            | 0.637737  | 2.862439 | 2.437884  |
| H  | 6.225863  | 0.420131  | -2.176980 | C            | 4.198033  | 3.870498 | 1.301975  |
| C  | 5.067024  | -1.671119 | -3.495407 | H            | 3.654001  | 3.089881 | -0.626638 |
| H  | 5.581949  | -0.973279 | -4.164644 | C            | 3.784518  | 4.128769 | 2.605209  |
| H  | 5.807826  | -2.423677 | -3.204194 | H            | 2.174451  | 3.960139 | 4.027165  |
| H  | 4.270026  | -2.173730 | -4.057130 | H            | 5.204837  | 4.134397 | 0.986000  |
| Cu | -0.370983 | 0.357877  | 0.499354  | H            | 4.468566  | 4.591230 | 3.313046  |
| C  | 0.197813  | -2.526660 | 2.556144  | H            | -3.751081 | 1.031954 | -0.438821 |
| C  | 0.877613  | -3.229003 | 3.558441  | O            | -1.833774 | 0.833990 | 1.872393  |
| C  | -1.144406 | -2.820042 | 2.310603  | C            | -2.074027 | 2.142827 | 2.289432  |
| C  | 0.227074  | -4.223290 | 4.279483  | H            | -1.467866 | 2.893661 | 1.749580  |
| H  | 1.918984  | -2.990929 | 3.775327  | H            | -3.131373 | 2.428954 | 2.122630  |
| C  | -1.798804 | -3.812695 | 3.035281  | H            | -1.868748 | 2.273201 | 3.365503  |
| H  | -1.682624 | -2.243670 | 1.559026  | H            | -2.780295 | 0.470257 | 1.094136  |
| C  | -1.110452 | -4.517374 | 4.016861  |              |           |          |           |
| H  | 0.761429  | -4.767237 | 5.054825  | <b>51-ts</b> |           |          |           |
| H  | -2.847468 | -4.024723 | 2.836452  | C            | -0.344318 | 2.563172 | 0.004542  |
| H  | -1.617062 | -5.292535 | 4.586907  | C            | 0.469503  | 2.960858 | 1.213890  |
| C  | 1.923707  | -0.307544 | 2.882807  | C            | -0.321960 | 2.957553 | 2.513847  |
| C  | 1.164253  | 0.311040  | 3.883990  | H            | 0.354046  | 3.162180 | 3.351110  |
| C  | 3.315299  | -0.223092 | 2.925580  | H            | -1.108443 | 3.722032 | 2.512966  |
| C  | 1.792172  | 0.976312  | 4.929001  | H            | -0.790683 | 1.979003 | 2.692546  |
| H  | 0.074550  | 0.268152  | 3.833331  | C            | 1.083450  | 4.333675 | 0.917518  |
| C  | 3.941056  | 0.466611  | 3.962281  | H            | 1.553414  | 4.263651 | -0.074954 |
| H  | 3.916371  | -0.706426 | 2.156104  | H            | 0.274883  | 5.073424 | 0.826928  |
| C  | 3.183220  | 1.057657  | 4.967511  | C            | 2.142528  | 4.805181 | 1.920235  |
| H  | 1.195641  | 1.445329  | 5.708626  | H            | 1.659693  | 5.185206 | 2.830059  |
| H  | 5.026337  | 0.534100  | 3.986035  | H            | 2.734087  | 3.932234 | 2.227855  |
| H  | 3.675697  | 1.588152  | 5.779511  | C            | 3.038405  | 5.862302 | 1.338067  |
| C  | -0.155162 | 3.606447  | -0.925485 | H            | 2.861826  | 6.893822 | 1.651223  |

|   |           |           |           |    |           |           |           |
|---|-----------|-----------|-----------|----|-----------|-----------|-----------|
| C | 4.002614  | 5.641938  | 0.433706  | C  | 2.174579  | -1.764485 | -3.489652 |
| C | 4.822497  | 6.762251  | -0.128986 | H  | 2.164511  | -2.811739 | -5.365989 |
| H | 4.528180  | 7.733945  | 0.281884  | H  | 2.796631  | -0.950687 | -3.857455 |
| H | 5.891940  | 6.612239  | 0.076769  | P  | -0.805813 | -1.159217 | 1.585965  |
| H | 4.726074  | 6.810258  | -1.223107 | P  | 1.922157  | -0.316081 | -1.040847 |
| C | 4.332385  | 4.283729  | -0.111701 | C  | 0.733107  | -5.943773 | -1.230042 |
| H | 3.801967  | 3.475960  | 0.404337  | H  | 1.310340  | -5.411493 | -0.464189 |
| H | 4.070660  | 4.217941  | -1.180120 | H  | 0.193017  | -6.764619 | -0.741500 |
| H | 5.412016  | 4.086486  | -0.049915 | H  | 1.437817  | -6.370206 | -1.955147 |
| O | 1.594098  | 2.075474  | 1.355527  | C  | -1.026495 | -5.800261 | -2.991826 |
| C | -1.695520 | 2.423811  | -0.046964 | H  | -0.340360 | -6.245363 | -3.720233 |
| H | -2.233788 | 2.395826  | 0.904901  | H  | -1.565517 | -6.633896 | -2.529391 |
| C | -2.466322 | 2.207865  | -1.266412 | H  | -1.748238 | -5.173390 | -3.528894 |
| C | -3.912775 | 2.462033  | -1.292923 | Cu | -0.212270 | 0.164243  | -0.241097 |
| C | -4.709872 | 2.572197  | -0.138252 | C  | -2.176169 | -0.582164 | 2.653866  |
| C | -4.569638 | 2.548955  | -2.537132 | C  | -2.143600 | -0.643112 | 4.048392  |
| C | -6.080179 | 2.748371  | -0.216263 | C  | -3.286755 | -0.010553 | 2.018500  |
| H | -4.252487 | 2.523061  | 0.847715  | C  | -3.206113 | -0.139865 | 4.796357  |
| C | -5.935391 | 2.727973  | -2.630081 | H  | -1.286489 | -1.083235 | 4.555213  |
| H | -3.975667 | 2.469274  | -3.447145 | C  | -4.353760 | 0.470959  | 2.767393  |
| C | -6.712385 | 2.827918  | -1.464409 | H  | -3.318855 | 0.042318  | 0.928351  |
| H | -6.672877 | 2.833200  | 0.692397  | C  | -4.311551 | 0.413130  | 4.159317  |
| H | -6.416523 | 2.794874  | -3.603093 | H  | -3.169493 | -0.187687 | 5.882075  |
| C | -8.121941 | 3.015013  | -1.548546 | H  | -5.220001 | 0.894521  | 2.262194  |
| N | -9.275402 | 3.169224  | -1.616694 | H  | -5.141981 | 0.799173  | 4.745429  |
| H | -1.962233 | 2.609846  | -2.157520 | C  | 0.450373  | -1.759935 | 2.776510  |
| H | 1.270697  | 1.184798  | 1.142845  | C  | 1.372415  | -0.846538 | 3.299512  |
| C | -2.434100 | -4.930041 | -0.542451 | C  | 0.492041  | -3.091355 | 3.201139  |
| C | -1.187354 | -4.409025 | -0.890088 | C  | 2.313515  | -1.259427 | 4.236454  |
| C | -0.738885 | -3.308952 | -0.164141 | H  | 1.364043  | 0.196555  | 2.979797  |
| C | -1.474777 | -2.703077 | 0.857050  | C  | 1.443929  | -3.504258 | 4.128415  |
| C | -2.707151 | -3.266982 | 1.188506  | H  | -0.225654 | -3.808535 | 2.805151  |
| C | -3.181183 | -4.373663 | 0.491209  | C  | 2.354608  | -2.588808 | 4.647347  |
| H | -2.830525 | -5.788545 | -1.078217 | H  | 3.025298  | -0.541121 | 4.636998  |
| H | -3.305943 | -2.827287 | 1.983473  | H  | 1.470460  | -4.543385 | 4.448107  |
| H | -4.144207 | -4.804630 | 0.752466  | H  | 3.098636  | -2.911945 | 5.371813  |
| O | 0.488466  | -2.757534 | -0.440166 | C  | 2.762263  | 0.927496  | -2.085327 |
| C | -0.259970 | -5.003917 | -1.942341 | C  | 1.952482  | 1.815450  | -2.801617 |
| C | 0.539380  | -3.865703 | -2.564352 | C  | 4.151159  | 1.002985  | -2.227701 |
| C | 0.911062  | -2.802170 | -1.745265 | C  | 2.519267  | 2.771958  | -3.637683 |
| C | 0.998267  | -3.838518 | -3.881005 | H  | 0.867680  | 1.744731  | -2.706122 |
| C | 1.713725  | -1.741729 | -2.172128 | C  | 4.717413  | 1.962089  | -3.061250 |
| C | 1.811717  | -2.804600 | -4.337981 | H  | 4.791323  | 0.311919  | -1.682148 |
| H | 0.727872  | -4.639626 | -4.564480 | C  | 3.904033  | 2.848268  | -3.763697 |



|           |            |           |           |   |           |           |           |
|-----------|------------|-----------|-----------|---|-----------|-----------|-----------|
| H         | 1.880347   | 3.457236  | -4.189141 | C | -0.674623 | 1.497655  | -3.124094 |
| H         | 5.798562   | 2.016627  | -3.164242 | C | 0.370730  | -1.069755 | -3.345956 |
| H         | 4.350266   | 3.597689  | -4.413001 | H | -1.148549 | -1.667016 | -1.966170 |
| C         | 3.218157   | -0.858585 | 0.144390  | C | 0.390532  | 1.268469  | -3.973652 |
| C         | 3.882337   | 0.103386  | 0.917264  | H | -1.088875 | 2.501542  | -3.032362 |
| C         | 3.516631   | -2.209809 | 0.343868  | C | 0.923831  | -0.026911 | -4.097184 |
| C         | 4.830517   | -0.281514 | 1.857909  | H | 0.760475  | -2.081502 | -3.448985 |
| H         | 3.654220   | 1.159934  | 0.787479  | H | 0.824703  | 2.085694  | -4.545915 |
| C         | 4.457001   | -2.591197 | 1.296590  | C | 2.035618  | -0.285940 | -4.952026 |
| H         | 3.015101   | -2.975513 | -0.244319 | N | 2.960153  | -0.506532 | -5.626873 |
| C         | 5.117652   | -1.629725 | 2.053443  | H | -5.078838 | 0.836879  | -1.509140 |
| H         | 5.343262   | 0.477943  | 2.443975  | H | -2.949263 | 1.621849  | -1.892719 |
| H         | 4.674709   | -3.646784 | 1.442605  | B | -1.922828 | 1.281989  | 0.052568  |
| H         | 5.854379   | -1.930127 | 2.795032  | O | -1.266598 | 2.572578  | -0.053640 |
| H         | 0.195054   | 2.682924  | -0.940721 | O | -3.045141 | 1.492170  | 0.958272  |
| O         | -1.696079  | -0.244540 | -1.563042 | C | -1.875446 | 3.519494  | 0.809554  |
| H         | -2.249091  | 0.954483  | -1.448303 | C | -3.275243 | 2.884188  | 1.116559  |
| C         | -1.481930  | -0.472462 | -2.921027 | C | -0.994173 | 3.686799  | 2.044741  |
| H         | -1.852812  | -1.464463 | -3.233722 | H | 0.022373  | 3.926279  | 1.704216  |
| H         | -2.012098  | 0.278743  | -3.540105 | H | -1.337984 | 4.502164  | 2.694086  |
| H         | -0.415949  | -0.431017 | -3.211149 | H | -0.935778 | 2.769064  | 2.639382  |
|           |            |           |           | C | -1.947396 | 4.862284  | 0.095357  |
| <b>52</b> |            |           |           | H | -2.539995 | 5.589272  | 0.666161  |
| C         | -4.695633  | -0.112063 | -1.117596 | H | -0.936412 | 5.274129  | -0.018154 |
| C         | -5.667957  | -0.807772 | -0.204713 | H | -2.382830 | 4.760318  | -0.905668 |
| C         | -5.204020  | -2.187393 | 0.238369  | C | -3.781646 | 3.135866  | 2.527697  |
| H         | -5.898994  | -2.605479 | 0.973800  | H | -3.898652 | 4.210272  | 2.721196  |
| H         | -5.134055  | -2.878321 | -0.612727 | H | -4.764263 | 2.663871  | 2.655708  |
| H         | -4.221505  | -2.120930 | 0.722886  | H | -3.105496 | 2.717392  | 3.280352  |
| C         | -7.057272  | -0.847810 | -0.838410 | C | -4.361965 | 3.313120  | 0.131426  |
| H         | -7.304476  | 0.177815  | -1.152883 | H | -5.237507 | 2.670760  | 0.286924  |
| H         | -7.004570  | -1.453058 | -1.757347 | H | -4.665281 | 4.356533  | 0.280754  |
| C         | -8.176133  | -1.368148 | 0.061864  | H | -4.038740 | 3.193188  | -0.908872 |
| H         | -7.977271  | -2.421604 | 0.316176  | H | -4.878767 | 0.431702  | 1.075744  |
| H         | -8.156946  | -0.813301 | 1.007537  | C | 2.872545  | 2.428156  | 4.047968  |
| C         | -9.507891  | -1.273845 | -0.612175 | C | 2.901302  | 1.102379  | 3.616547  |
| H         | -9.553724  | -1.754502 | -1.595537 | C | 2.810334  | 0.880491  | 2.243136  |
| C         | -10.623682 | -0.674061 | -0.177368 | C | 2.716689  | 1.905754  | 1.297356  |
| O         | -5.765594  | 0.044659  | 0.951411  | C | 2.716519  | 3.219516  | 1.771907  |
| C         | -3.380288  | -0.333122 | -1.181313 | C | 2.784866  | 3.475957  | 3.137049  |
| H         | -2.972154  | -1.250697 | -0.750202 | H | 2.929642  | 2.652495  | 5.110020  |
| C         | -2.415230  | 0.749828  | -1.489127 | H | 2.639233  | 4.046854  | 1.068938  |
| C         | -1.260471  | 0.460842  | -2.367483 | H | 2.770924  | 4.502474  | 3.493892  |
| C         | -0.695083  | -0.825124 | -2.485886 | O | 2.810161  | -0.403318 | 1.752878  |

|    |          |           |           |              |            |           |           |
|----|----------|-----------|-----------|--------------|------------|-----------|-----------|
| C  | 3.110953 | -0.098896 | 4.530487  | C            | -1.072382  | -3.385698 | -0.046015 |
| C  | 2.347058 | -1.275171 | 3.939080  | C            | 0.662113   | -4.854936 | -0.868165 |
| C  | 2.272254 | -1.379179 | 2.552718  | C            | -2.027064  | -4.358090 | -0.319281 |
| C  | 1.761893 | -2.301396 | 4.680849  | H            | -1.371592  | -2.419610 | 0.370659  |
| C  | 1.634879 | -2.430229 | 1.891023  | C            | -0.299957  | -5.823104 | -1.149103 |
| C  | 1.145100 | -3.381558 | 4.055047  | H            | 1.711316   | -5.055156 | -1.079787 |
| H  | 1.790048 | -2.266277 | 5.766989  | C            | -1.640926  | -5.577406 | -0.873928 |
| C  | 1.081620 | -3.450048 | 2.667378  | H            | -3.075851  | -4.161026 | -0.106448 |
| H  | 0.707054 | -4.174050 | 4.656015  | H            | 0.003026   | -6.773588 | -1.581838 |
| H  | 0.580043 | -4.286170 | 2.183368  | H            | -2.389285  | -6.335072 | -1.093126 |
| P  | 2.445304 | 1.477869  | -0.470383 | C            | 3.062674   | -2.892554 | -0.566981 |
| P  | 1.461774 | -2.291676 | 0.074214  | C            | 3.413877   | -2.558272 | -1.877299 |
| C  | 4.612391 | -0.446578 | 4.519693  | C            | 3.923772   | -3.690167 | 0.191639  |
| H  | 4.965726 | -0.667792 | 3.505418  | C            | 4.598576   | -3.029525 | -2.431072 |
| H  | 5.197359 | 0.395348  | 4.910622  | H            | 2.765934   | -1.904688 | -2.460615 |
| H  | 4.802021 | -1.326404 | 5.147280  | C            | 5.117516   | -4.147499 | -0.358565 |
| C  | 2.683596 | 0.193062  | 5.964418  | H            | 3.658265   | -3.957026 | 1.213780  |
| H  | 2.874753 | -0.671634 | 6.608518  | C            | 5.452782   | -3.822174 | -1.670138 |
| H  | 3.265349 | 1.021308  | 6.382027  | H            | 4.864398   | -2.751195 | -3.448684 |
| H  | 1.619077 | 0.447255  | 6.027856  | H            | 5.785436   | -4.763633 | 0.238878  |
| Cu | 0.766322 | -0.146900 | -0.531186 | H            | 6.386446   | -4.181130 | -2.097071 |
| C  | 2.445028 | 3.134511  | -1.259890 | C            | -0.751844  | 0.185025  | 1.947128  |
| C  | 1.224933 | 3.780136  | -1.474896 | H            | -0.464914  | -0.830046 | 2.254598  |
| C  | 3.638355 | 3.790152  | -1.586004 | H            | -1.635274  | 0.487051  | 2.522168  |
| C  | 1.200429 | 5.058288  | -2.028882 | H            | 0.081208   | 0.866437  | 2.199553  |
| H  | 0.295544 | 3.289862  | -1.181806 | O            | -1.036088  | 0.189931  | 0.563577  |
| C  | 3.607531 | 5.067210  | -2.135049 | C            | -10.763118 | 0.033885  | 1.135847  |
| H  | 4.595834 | 3.301568  | -1.411048 | H            | -9.846788  | 0.035554  | 1.731982  |
| C  | 2.387957 | 5.701189  | -2.363042 | H            | -11.068515 | 1.078083  | 0.979902  |
| H  | 0.243787 | 5.549888  | -2.199673 | H            | -11.556980 | -0.428882 | 1.739013  |
| H  | 4.539233 | 5.568923  | -2.385952 | C            | -11.872787 | -0.672584 | -1.007235 |
| H  | 2.366350 | 6.697764  | -2.798135 | H            | -12.703345 | -1.154919 | -0.472089 |
| C  | 4.056581 | 0.811976  | -1.051955 | H            | -12.202894 | 0.354106  | -1.220785 |
| C  | 4.222642 | 0.678792  | -2.435472 | H            | -11.735278 | -1.191598 | -1.961787 |
| C  | 5.104865 | 0.446705  | -0.206623 |              |            |           |           |
| C  | 5.413719 | 0.202346  | -2.965806 | <b>53-ts</b> |            |           |           |
| H  | 3.417689 | 0.972302  | -3.109498 | C            | -4.437699  | -0.357691 | -1.650234 |
| C  | 6.294225 | -0.047800 | -0.738332 | C            | -5.222941  | -1.249855 | -0.733927 |
| H  | 5.003091 | 0.550565  | 0.871874  | C            | -4.710694  | -2.681146 | -0.683423 |
| C  | 6.453526 | -0.165824 | -2.115045 | H            | -5.255216  | -3.253792 | 0.075388  |
| H  | 5.518243 | 0.107576  | -4.044733 | H            | -4.834163  | -3.178477 | -1.654105 |
| H  | 7.102510 | -0.334090 | -0.069261 | H            | -3.649483  | -2.706810 | -0.405922 |
| H  | 7.385112 | -0.549393 | -2.525055 | C            | -6.703427  | -1.201787 | -1.121858 |
| C  | 0.281595 | -3.631697 | -0.314413 | H            | -6.994904  | -0.139672 | -1.143861 |

|   |            |           |           |    |           |           |           |
|---|------------|-----------|-----------|----|-----------|-----------|-----------|
| H | -6.821798  | -1.577250 | -2.150206 | H  | -1.089053 | 5.309688  | -0.585456 |
| C | -7.639164  | -1.946902 | -0.167634 | H  | -2.446925 | 4.718201  | -1.560573 |
| H | -7.527904  | -3.031039 | -0.307641 | C  | -4.135058 | 3.217038  | 1.769187  |
| H | -7.313069  | -1.734018 | 0.859232  | H  | -4.345804 | 4.290021  | 1.860083  |
| C | -9.077938  | -1.565716 | -0.354531 | H  | -5.090368 | 2.680047  | 1.820369  |
| H | -9.672724  | -2.198695 | -1.018181 | H  | -3.526076 | 2.904309  | 2.622237  |
| C | -9.680815  | -0.498734 | 0.186455  | C  | -4.438319 | 3.171167  | -0.685183 |
| C | -11.122617 | -0.192253 | -0.082810 | H  | -5.292610 | 2.491526  | -0.569836 |
| H | -11.581740 | -0.929088 | -0.750600 | H  | -4.813187 | 4.200775  | -0.657318 |
| H | -11.702753 | -0.168917 | 0.850937  | H  | -3.992192 | 2.988329  | -1.667727 |
| H | -11.238443 | 0.801467  | -0.538787 | H  | -4.554740 | 0.081478  | 0.544378  |
| C | -8.991275  | 0.480925  | 1.088473  | C  | 1.423419  | 2.113342  | 4.463231  |
| H | -7.934001  | 0.250661  | 1.253703  | C  | 1.532162  | 0.823829  | 3.938831  |
| H | -9.050055  | 1.493978  | 0.664809  | C  | 1.869303  | 0.721879  | 2.590680  |
| H | -9.490930  | 0.531205  | 2.066462  | C  | 2.075960  | 1.827221  | 1.756392  |
| O | -5.115859  | -0.709615 | 0.606824  | C  | 1.981370  | 3.094422  | 2.331620  |
| C | -3.110528  | -0.422847 | -1.879210 | C  | 1.656563  | 3.235403  | 3.676490  |
| H | -2.574765  | -1.329011 | -1.578353 | H  | 1.173738  | 2.248675  | 5.512724  |
| C | -2.315192  | 0.683603  | -2.341339 | H  | 2.147604  | 3.977433  | 1.717896  |
| C | -1.006371  | 0.594349  | -2.859242 | H  | 1.578715  | 4.227588  | 4.113508  |
| C | -0.197315  | -0.585228 | -2.760625 | O  | 2.056068  | -0.502910 | 2.005756  |
| C | -0.383752  | 1.717473  | -3.490894 | C  | 1.431172  | -0.440254 | 4.785254  |
| C | 1.075890   | -0.644345 | -3.318345 | C  | 1.056789  | -1.612893 | 3.888232  |
| H | -0.644893  | -1.511324 | -2.403687 | C  | 1.430777  | -1.592148 | 2.547834  |
| C | 0.881120   | 1.661510  | -4.019110 | C  | 0.419137  | -2.769323 | 4.341945  |
| H | -0.953535  | 2.645166  | -3.559069 | C  | 1.179396  | -2.642220 | 1.659316  |
| C | 1.648266   | 0.471632  | -3.952464 | C  | 0.180503  | -3.847213 | 3.494917  |
| H | 1.620810   | -1.588710 | -3.295253 | H  | 0.108015  | -2.839501 | 5.381364  |
| H | 1.311208   | 2.543895  | -4.490075 | C  | 0.559267  | -3.788312 | 2.157783  |
| C | 2.966400   | 0.389506  | -4.462732 | H  | -0.306724 | -4.738560 | 3.881088  |
| N | 4.066037   | 0.298725  | -4.850728 | H  | 0.350310  | -4.623734 | 1.492460  |
| H | -4.951996  | 0.569088  | -1.927024 | P  | 2.355483  | 1.549092  | -0.040568 |
| H | -2.869804  | 1.579127  | -2.632976 | P  | 1.526133  | -2.318803 | -0.107742 |
| B | -1.878138  | 1.367005  | -0.191112 | C  | 2.824838  | -0.722257 | 5.377255  |
| O | -1.325591  | 2.608305  | -0.497428 | H  | 3.570993  | -0.848671 | 4.582744  |
| O | -3.115531  | 1.511869  | 0.442324  | H  | 3.142303  | 0.110624  | 6.017153  |
| C | -2.063084  | 3.588216  | 0.251094  | H  | 2.805706  | -1.639611 | 5.979120  |
| C | -3.456733  | 2.907665  | 0.447587  | C  | 0.423480  | -0.270368 | 5.920088  |
| C | -1.312447  | 3.795305  | 1.559648  | H  | 0.390512  | -1.163529 | 6.552190  |
| H | -0.285297  | 4.097022  | 1.321467  | H  | 0.706136  | 0.557090  | 6.578382  |
| H | -1.767888  | 4.574229  | 2.182671  | H  | -0.584584 | -0.079497 | 5.532954  |
| H | -1.253874  | 2.865280  | 2.143208  | Cu | 0.904823  | -0.146533 | -0.776772 |
| C | -2.097709  | 4.882650  | -0.535395 | C  | 2.471106  | 3.261788  | -0.691547 |
| H | -2.752873  | 5.618753  | -0.052584 | C  | 1.385286  | 3.807674  | -1.376995 |

|   |           |           |           |           |            |           |           |
|---|-----------|-----------|-----------|-----------|------------|-----------|-----------|
| C | 3.619889  | 4.040657  | -0.495657 | H         | -2.627889  | -0.789840 | 1.089724  |
| C | 1.450390  | 5.109263  | -1.871654 | H         | -1.457245  | -0.042511 | 2.211321  |
| H | 0.484924  | 3.214431  | -1.515040 | O         | -1.069558  | 0.281747  | 0.192111  |
| C | 3.677821  | 5.340850  | -0.982379 |           |            |           |           |
| H | 4.473600  | 3.626345  | 0.039659  | <b>54</b> |            |           |           |
| C | 2.593537  | 5.876156  | -1.676417 | C         | -2.692994  | 1.546326  | -1.914042 |
| H | 0.600917  | 5.517413  | -2.417574 | C         | -3.532470  | 0.602641  | -1.095545 |
| H | 4.573313  | 5.937066  | -0.823843 | C         | -2.870402  | -0.751455 | -0.874904 |
| H | 2.644783  | 6.890558  | -2.065309 | H         | -3.446940  | -1.345173 | -0.156105 |
| C | 4.115461  | 1.034464  | -0.153452 | H         | -2.775744  | -1.325616 | -1.806494 |
| C | 4.690371  | 1.033682  | -1.429328 | H         | -1.863485  | -0.623588 | -0.453598 |
| C | 4.896272  | 0.674074  | 0.944945  | C         | -4.915882  | 0.455527  | -1.734891 |
| C | 6.024953  | 0.692546  | -1.601887 | H         | -5.323894  | 1.466655  | -1.883747 |
| H | 4.093816  | 1.314094  | -2.297947 | H         | -4.784345  | 0.022505  | -2.738408 |
| C | 6.231144  | 0.313914  | 0.767782  | C         | -5.928684  | -0.370939 | -0.941317 |
| H | 4.474649  | 0.689873  | 1.948292  | H         | -5.545801  | -1.397136 | -0.823495 |
| C | 6.797947  | 0.326778  | -0.502188 | H         | -6.013295  | 0.044848  | 0.069822  |
| H | 6.456134  | 0.702902  | -2.600697 | C         | -7.251875  | -0.422051 | -1.635949 |
| H | 6.831270  | 0.036369  | 1.631424  | H         | -7.220368  | -0.853234 | -2.642336 |
| H | 7.842245  | 0.053580  | -0.635845 | C         | -8.441032  | 0.010895  | -1.196680 |
| C | 0.687848  | -3.706626 | -0.963329 | C         | -9.669725  | -0.105371 | -2.048127 |
| C | -0.713679 | -3.703127 | -1.013382 | H         | -9.458810  | -0.567695 | -3.018301 |
| C | 1.385482  | -4.721655 | -1.621713 | H         | -10.443525 | -0.702983 | -1.545272 |
| C | -1.400732 | -4.696972 | -1.698012 | H         | -10.117688 | 0.882158  | -2.229357 |
| H | -1.274832 | -2.917533 | -0.502707 | C         | -8.684459  | 0.636676  | 0.142998  |
| C | 0.694730  | -5.713660 | -2.314532 | H         | -7.781189  | 0.734257  | 0.751012  |
| H | 2.473691  | -4.740612 | -1.595427 | H         | -9.122621  | 1.637741  | 0.025474  |
| C | -0.695143 | -5.703807 | -2.354382 | H         | -9.416115  | 0.049438  | 0.715702  |
| H | -2.488224 | -4.681570 | -1.725217 | O         | -3.775626  | 1.210736  | 0.187432  |
| H | 1.248997  | -6.498338 | -2.823857 | C         | -1.448942  | 1.311721  | -2.394755 |
| H | -1.230685 | -6.478703 | -2.897195 | H         | -1.050119  | 0.300785  | -2.252958 |
| C | 3.297144  | -2.715148 | -0.307844 | C         | -0.530167  | 2.267796  | -2.928583 |
| C | 3.966131  | -2.204724 | -1.423181 | C         | 0.830956   | 2.019507  | -3.010936 |
| C | 3.970730  | -3.573512 | 0.565770  | C         | 1.404140   | 0.680578  | -3.003470 |
| C | 5.281489  | -2.572443 | -1.682120 | C         | 1.795567   | 3.093167  | -3.002259 |
| H | 3.460066  | -1.505435 | -2.088973 | C         | 2.777758   | 0.476064  | -2.860941 |
| C | 5.293707  | -3.924228 | 0.315624  | H         | 0.799070   | -0.165248 | -3.333751 |
| H | 3.454690  | -3.977055 | 1.436083  | C         | 3.128318   | 2.875312  | -2.816994 |
| C | 5.945421  | -3.433597 | -0.813076 | H         | 1.420287   | 4.114652  | -3.069014 |
| H | 5.788684  | -2.167896 | -2.555496 | C         | 3.662572   | 1.551797  | -2.693962 |
| H | 5.814332  | -4.590663 | 0.999258  | H         | 3.165743   | -0.544013 | -2.895936 |
| H | 6.976954  | -3.715666 | -1.010838 | H         | 3.810390   | 3.721011  | -2.742742 |
| C | -1.569794 | -0.542864 | 1.237148  | C         | 5.013598   | 1.327794  | -2.350878 |
| H | -0.989249 | -1.469442 | 1.258603  | N         | 6.120730   | 1.134773  | -2.020621 |

|    |           |           |           |              |           |           |           |
|----|-----------|-----------|-----------|--------------|-----------|-----------|-----------|
| H  | -3.135046 | 2.541447  | -2.039178 | H            | 0.359962  | 7.266043  | -0.644575 |
| H  | -0.853911 | 3.310036  | -2.970425 | C            | 2.501722  | 1.598449  | 1.692517  |
| H  | -2.910023 | 1.424633  | 0.562849  | C            | 3.690252  | 1.773317  | 0.971000  |
| C  | -2.671212 | 0.966615  | 3.545097  | C            | 2.563398  | 1.238270  | 3.039080  |
| C  | -1.959456 | -0.114372 | 3.025539  | C            | 4.921330  | 1.621340  | 1.595368  |
| C  | -0.827753 | 0.177080  | 2.263891  | H            | 3.652649  | 2.030110  | -0.090080 |
| C  | -0.420685 | 1.485095  | 1.965431  | C            | 3.800132  | 1.061965  | 3.656202  |
| C  | -1.148974 | 2.535879  | 2.532323  | H            | 1.646694  | 1.093255  | 3.609028  |
| C  | -2.264550 | 2.276911  | 3.319081  | C            | 4.976897  | 1.260167  | 2.940205  |
| H  | -3.558348 | 0.786491  | 4.146858  | H            | 5.832552  | 1.757094  | 1.015940  |
| H  | -0.853990 | 3.563188  | 2.333554  | H            | 3.841326  | 0.775262  | 4.704301  |
| H  | -2.827171 | 3.100875  | 3.749056  | H            | 5.939533  | 1.122954  | 3.427358  |
| O  | -0.047064 | -0.832222 | 1.764972  | C            | 1.522499  | -3.142644 | -1.886728 |
| C  | -2.316165 | -1.566227 | 3.318702  | C            | 0.605328  | -3.020268 | -2.938296 |
| C  | -1.786066 | -2.439160 | 2.189271  | C            | 2.553280  | -4.080120 | -1.980045 |
| C  | -0.654209 | -2.032065 | 1.489531  | C            | 0.709863  | -3.832561 | -4.060438 |
| C  | -2.328884 | -3.677598 | 1.841927  | H            | -0.207007 | -2.294695 | -2.866387 |
| C  | -0.072986 | -2.784901 | 0.464761  | C            | 2.662005  | -4.885199 | -3.111358 |
| C  | -1.763214 | -4.463500 | 0.843007  | H            | 3.272472  | -4.183483 | -1.168869 |
| H  | -3.208420 | -4.045175 | 2.363990  | C            | 1.742735  | -4.763928 | -4.148487 |
| C  | -0.639180 | -4.021555 | 0.153991  | H            | -0.010714 | -3.735351 | -4.868600 |
| H  | -2.203564 | -5.427027 | 0.600899  | H            | 3.467672  | -5.612134 | -3.179692 |
| H  | -0.206303 | -4.630070 | -0.637754 | H            | 1.830415  | -5.395041 | -5.029391 |
| P  | 0.938082  | 1.763018  | 0.763099  | C            | 2.786870  | -2.325999 | 0.576403  |
| P  | 1.311891  | -2.031372 | -0.453731 | C            | 3.938656  | -1.591642 | 0.276188  |
| C  | -1.606871 | -1.983333 | 4.620085  | C            | 2.818087  | -3.266371 | 1.609311  |
| H  | -0.519275 | -1.875835 | 4.528672  | C            | 5.111421  | -1.801090 | 0.991842  |
| H  | -1.944690 | -1.357584 | 5.455672  | H            | 3.916493  | -0.848521 | -0.522627 |
| H  | -1.829851 | -3.031754 | 4.854898  | C            | 3.990032  | -3.463794 | 2.333625  |
| C  | -3.825781 | -1.733220 | 3.486060  | H            | 1.928232  | -3.848178 | 1.846308  |
| H  | -4.085117 | -2.772980 | 3.708910  | C            | 5.135323  | -2.734314 | 2.024987  |
| H  | -4.193850 | -1.141296 | 4.330024  | H            | 5.998946  | -1.220420 | 0.749235  |
| H  | -4.363772 | -1.421216 | 2.581419  | H            | 4.009468  | -4.192958 | 3.140081  |
| Cu | 1.131605  | 0.218368  | -0.921247 | H            | 6.049345  | -2.893547 | 2.592133  |
| C  | 0.785659  | 3.546767  | 0.384330  |              |           |           |           |
| C  | -0.375958 | 3.970844  | -0.272730 | <b>55-ts</b> |           |           |           |
| C  | 1.786650  | 4.476775  | 0.673020  | C            | -4.974784 | 0.614036  | 0.652408  |
| C  | -0.531196 | 5.304619  | -0.630484 | C            | -6.049768 | -0.431237 | 0.778963  |
| H  | -1.168515 | 3.255217  | -0.494873 | C            | -5.649646 | -1.772154 | 0.178345  |
| C  | 1.633702  | 5.809302  | 0.298885  | H            | -6.411659 | -2.526193 | 0.399301  |
| H  | 2.692319  | 4.165165  | 1.189343  | H            | -5.524127 | -1.713563 | -0.910473 |
| C  | 0.477534  | 6.224666  | -0.354139 | H            | -4.701263 | -2.112945 | 0.615701  |
| H  | -1.439597 | 5.621355  | -1.139019 | C            | -7.344336 | 0.107022  | 0.163914  |
| H  | 2.420744  | 6.524784  | 0.524886  | H            | -7.550875 | 1.083305  | 0.628171  |

|   |            |           |           |    |           |           |           |
|---|------------|-----------|-----------|----|-----------|-----------|-----------|
| H | -7.159376  | 0.303205  | -0.903104 | C  | 3.959639  | -2.053074 | 3.578255  |
| C | -8.577722  | -0.782536 | 0.326752  | C  | 3.061148  | -2.842454 | 2.636120  |
| H | -8.407239  | -1.740455 | -0.188653 | C  | 2.618654  | -2.215234 | 1.473687  |
| H | -8.707354  | -1.021272 | 1.388858  | C  | 2.692149  | -4.175307 | 2.816915  |
| C | -9.794359  | -0.130655 | -0.249044 | C  | 1.812948  | -2.842235 | 0.519491  |
| H | -9.758124  | 0.028251  | -1.331899 | C  | 1.918297  | -4.842229 | 1.871169  |
| C | -10.884065 | 0.308428  | 0.394418  | H  | 3.014418  | -4.709246 | 3.707170  |
| C | -12.005219 | 0.972814  | -0.347304 | C  | 1.476120  | -4.181034 | 0.730761  |
| H | -11.810988 | 1.032534  | -1.423432 | H  | 1.652259  | -5.883944 | 2.030424  |
| H | -12.951495 | 0.433038  | -0.199369 | H  | 0.851647  | -4.698605 | 0.004170  |
| H | -12.174382 | 1.992574  | 0.027123  | P  | 2.048837  | 1.778468  | 0.504124  |
| C | -11.109851 | 0.199865  | 1.871845  | P  | 1.181958  | -1.822652 | -0.866570 |
| H | -10.285739 | -0.280005 | 2.406233  | C  | 5.402799  | -2.120798 | 3.041624  |
| H | -11.261331 | 1.196108  | 2.310605  | H  | 5.471603  | -1.724307 | 2.021543  |
| H | -12.027029 | -0.368160 | 2.082260  | H  | 6.070709  | -1.532936 | 3.683642  |
| O | -6.341924  | -0.614620 | 2.172982  | H  | 5.752787  | -3.160617 | 3.029643  |
| C | -3.838233  | 0.534372  | -0.053668 | C  | 3.934623  | -2.617958 | 4.994176  |
| H | -3.645175  | -0.378582 | -0.626903 | H  | 4.288744  | -3.654151 | 5.004355  |
| C | -2.766481  | 1.539475  | -0.057905 | H  | 4.609934  | -2.055858 | 5.647800  |
| C | -1.919493  | 1.702586  | -1.232185 | H  | 2.927348  | -2.590062 | 5.426262  |
| C | -1.448022  | 0.587855  | -1.967149 | Cu | 0.488780  | 0.182665  | -0.044614 |
| C | -1.420696  | 2.970601  | -1.610857 | C  | 1.520166  | 3.499255  | 0.812986  |
| C | -0.543807  | 0.730180  | -3.006622 | C  | 0.178467  | 3.712325  | 1.140611  |
| H | -1.817872  | -0.409023 | -1.731872 | C  | 2.400309  | 4.585221  | 0.773979  |
| C | -0.505906  | 3.120793  | -2.633225 | C  | -0.279253 | 4.993955  | 1.429026  |
| H | -1.769994  | 3.850954  | -1.073364 | H  | -0.509125 | 2.865820  | 1.155922  |
| C | -0.049365  | 1.997967  | -3.348785 | C  | 1.940100  | 5.866620  | 1.057720  |
| H | -0.208569  | -0.145587 | -3.561637 | H  | 3.448014  | 4.425178  | 0.522405  |
| H | -0.134632  | 4.109760  | -2.895877 | C  | 0.601082  | 6.071368  | 1.384504  |
| C | 0.937585   | 2.129872  | -4.364724 | H  | -1.327365 | 5.150604  | 1.675980  |
| N | 1.767968   | 2.227556  | -5.179062 | H  | 2.627839  | 6.708175  | 1.024666  |
| H | -5.185004  | 1.525290  | 1.222814  | H  | 0.243264  | 7.074894  | 1.602243  |
| H | -3.069583  | 2.496177  | 0.386513  | C  | 3.521487  | 1.954907  | -0.569878 |
| H | -5.502235  | -0.811710 | 2.604943  | C  | 3.339673  | 2.539204  | -1.828790 |
| C | 3.587511   | 0.287215  | 4.611833  | C  | 4.784368  | 1.475121  | -0.217913 |
| C | 3.512398   | -0.597379 | 3.536677  | C  | 4.401183  | 2.647668  | -2.717675 |
| C | 3.070949   | -0.081415 | 2.318528  | H  | 2.355148  | 2.913580  | -2.112726 |
| C | 2.729236   | 1.260474  | 2.128888  | C  | 5.845868  | 1.575855  | -1.114235 |
| C | 2.834709   | 2.116344  | 3.227680  | H  | 4.946819  | 1.025023  | 0.760466  |
| C | 3.254532   | 1.630205  | 4.460156  | C  | 5.657667  | 2.160613  | -2.362099 |
| H | 3.919657   | -0.069692 | 5.583528  | H  | 4.240650  | 3.098587  | -3.694602 |
| H | 2.568059   | 3.165634  | 3.118933  | H  | 6.825409  | 1.197878  | -0.830757 |
| H | 3.325457   | 2.303074  | 5.310703  | H  | 6.488440  | 2.236617  | -3.059577 |
| O | 2.963326   | -0.907847 | 1.225767  | C  | -0.145733 | -2.868299 | -1.562292 |

|   |           |           |           |   |           |           |           |
|---|-----------|-----------|-----------|---|-----------|-----------|-----------|
| C | -1.379126 | -2.824614 | -0.896015 | C | 7.533756  | -0.892997 | -0.605772 |
| C | -0.007937 | -3.654916 | -2.706906 | H | 8.028496  | 0.033601  | -0.915623 |
| C | -2.451674 | -3.574299 | -1.364345 | H | 8.173535  | -1.390830 | 0.136616  |
| H | -1.491146 | -2.182119 | -0.018337 | H | 7.491684  | -1.566568 | -1.473326 |
| C | -1.089496 | -4.397122 | -3.177310 | C | 5.436057  | -1.873809 | 0.394518  |
| H | 0.944120  | -3.688125 | -3.234405 | H | 4.426657  | -1.673528 | 0.767860  |
| C | -2.307610 | -4.360007 | -2.506870 | H | 5.349102  | -2.586483 | -0.437563 |
| H | -3.406302 | -3.539330 | -0.843485 | H | 5.995820  | -2.394429 | 1.184131  |
| H | -0.977695 | -5.005450 | -4.071656 | O | 1.433397  | -0.211955 | 0.786196  |
| H | -3.149961 | -4.939433 | -2.877076 | C | -0.668113 | 0.344331  | -0.429957 |
| C | 2.536168  | -1.851399 | -2.091124 | H | -0.967067 | 1.376625  | -0.619525 |
| C | 2.748542  | -0.710305 | -2.869747 | C | -1.583323 | -0.602210 | -0.191457 |
| C | 3.349539  | -2.974247 | -2.282145 | H | -1.231345 | -1.619524 | -0.002205 |
| C | 3.744504  | -0.695409 | -3.841776 | C | -3.033612 | -0.426738 | -0.140169 |
| H | 2.136390  | 0.177788  | -2.706530 | C | -3.833365 | -1.529087 | 0.192396  |
| C | 4.347894  | -2.956424 | -3.249636 | C | -3.663021 | 0.798328  | -0.412409 |
| H | 3.198140  | -3.864167 | -1.671213 | C | -5.212707 | -1.422791 | 0.259061  |
| C | 4.542606  | -1.819227 | -4.031979 | H | -3.356750 | -2.484524 | 0.402639  |
| H | 3.892560  | 0.198617  | -4.444626 | C | -5.038669 | 0.918883  | -0.350514 |
| H | 4.976747  | -3.831651 | -3.394382 | H | -3.068999 | 1.668865  | -0.679781 |
| H | 5.323600  | -1.809554 | -4.788648 | C | -5.823050 | -0.193440 | -0.012554 |
| O | -1.049864 | 0.072376  | 1.236025  | H | -5.822550 | -2.283583 | 0.519701  |
| H | -1.892035 | 0.893263  | 0.728582  | H | -5.518794 | 1.870488  | -0.562566 |
| C | -0.820652 | 0.333719  | 2.588548  | C | -7.244880 | -0.069754 | 0.052285  |
| H | -0.291888 | 1.290336  | 2.764563  | N | -8.403263 | 0.032616  | 0.104866  |
| H | -1.769836 | 0.375949  | 3.149613  | H | 1.081330  | -0.675838 | -1.246015 |
| H | -0.203131 | -0.455965 | 3.048534  |   |           |           |           |

**57**

|              |          |           |           |   |           |           |           |
|--------------|----------|-----------|-----------|---|-----------|-----------|-----------|
| <b>56-ts</b> |          |           |           | C | -0.697539 | -0.465906 | -0.909439 |
| C            | 0.784219 | 0.032518  | -0.464295 | C | -1.620499 | -0.484613 | 0.250671  |
| C            | 1.818909 | 0.943843  | 0.034608  | C | -1.109534 | -0.629868 | 1.655032  |
| C            | 1.442096 | 2.253477  | 0.669270  | H | -1.590726 | 0.104237  | 2.311444  |
| H            | 2.128029 | 2.492747  | 1.489917  | H | -1.339490 | -1.628611 | 2.043860  |
| H            | 1.495375 | 3.069208  | -0.061567 | H | -0.028552 | -0.473292 | 1.707552  |
| H            | 0.430652 | 2.216472  | 1.085005  | C | -3.051631 | -0.896055 | 0.008382  |
| C            | 3.210764 | 0.844406  | -0.538720 | H | -3.276469 | -0.791734 | -1.062134 |
| H            | 3.312359 | -0.128081 | -1.040893 | H | -3.168284 | -1.961671 | 0.256829  |
| H            | 3.354811 | 1.616080  | -1.308881 | C | -4.058385 | -0.064993 | 0.808608  |
| C            | 4.296309 | 0.958101  | 0.537070  | H | -3.866638 | -0.202056 | 1.884094  |
| H            | 4.317444 | 1.981831  | 0.934203  | H | -3.885692 | 0.998548  | 0.597161  |
| H            | 4.010328 | 0.310653  | 1.378523  | C | -5.464869 | -0.471667 | 0.505845  |
| C            | 5.656711 | 0.595085  | 0.021682  | H | -5.704524 | -1.505776 | 0.774145  |
| H            | 6.268658 | 1.417724  | -0.356065 | C | -6.435639 | 0.250550  | -0.068482 |
| C            | 6.164737 | -0.642079 | -0.051411 | C | -7.792136 | -0.340767 | -0.311157 |

|              |           |           |           |   |            |           |           |
|--------------|-----------|-----------|-----------|---|------------|-----------|-----------|
| H            | -7.858379 | -1.378345 | 0.032633  | H | -10.242810 | -1.115612 | 0.850019  |
| H            | -8.572419 | 0.240031  | 0.200778  | H | -9.470215  | 0.456664  | 0.711713  |
| H            | -8.046195 | -0.317157 | -1.380312 | C | -7.556210  | -1.402572 | 1.537061  |
| C            | -6.301327 | 1.674073  | -0.515265 | H | -6.559540  | -1.853680 | 1.482759  |
| H            | -5.301083 | 2.089453  | -0.367351 | H | -7.461262  | -0.438060 | 2.058366  |
| H            | -6.550456 | 1.765258  | -1.581532 | H | -8.184826  | -2.034410 | 2.180224  |
| H            | -7.016152 | 2.314291  | 0.020271  | O | -3.504666  | -2.742516 | -0.265531 |
| O            | -1.256414 | 0.734701  | -0.402280 | C | -1.275903  | -1.740633 | -0.610589 |
| C            | 0.762155  | -0.636944 | -0.818485 | C | -0.563342  | -2.350454 | 0.501094  |
| H            | 1.145920  | -1.570909 | -1.231546 | C | 0.458882   | -3.349269 | 0.404889  |
| C            | 1.587077  | 0.286879  | -0.307893 | C | 0.994265   | -3.915736 | 1.595024  |
| H            | 1.142307  | 1.216785  | 0.051106  | C | 0.984722   | -3.838259 | -0.820868 |
| C            | 3.039982  | 0.190118  | -0.201506 | C | 2.004511   | -4.849494 | 1.568417  |
| C            | 3.759905  | 1.318095  | 0.219392  | H | 0.594580   | -3.581260 | 2.552983  |
| C            | 3.752622  | -0.982996 | -0.499177 | C | 1.996427   | -4.772541 | -0.852912 |
| C            | 5.139517  | 1.290373  | 0.332309  | H | 0.593007   | -3.462137 | -1.763722 |
| H            | 3.218106  | 2.231297  | 0.457719  | C | 2.539775   | -5.289100 | 0.340218  |
| C            | 5.129961  | -1.024915 | -0.391731 | H | 2.401773   | -5.252278 | 2.498512  |
| H            | 3.219412  | -1.878295 | -0.809927 | H | 2.389542   | -5.110324 | -1.810467 |
| C            | 5.833840  | 0.114709  | 0.024403  | C | 3.603669   | -6.227241 | 0.310057  |
| H            | 5.686720  | 2.171519  | 0.656628  | N | 4.483363   | -6.995403 | 0.289247  |
| H            | 5.673719  | -1.936884 | -0.623802 | H | -2.986188  | -0.808505 | 0.408033  |
| C            | 7.256891  | 0.071675  | 0.138618  | H | -1.038794  | -2.144411 | -1.598219 |
| N            | 8.416855  | 0.035277  | 0.231468  | H | -1.026077  | -2.243503 | 1.485950  |
| H            | -1.130154 | -0.797727 | -1.860409 | C | 2.994276   | 4.072125  | -2.461015 |
|              |           |           |           | C | 2.473657   | 3.866871  | -1.183401 |
|              |           |           |           | C | 2.325470   | 2.544364  | -0.763927 |
| <b>58-ts</b> |           |           |           | C | 2.692106   | 1.444043  | -1.543433 |
| C            | -2.742186 | -1.537830 | -0.372014 | C | 3.237680   | 1.695377  | -2.804699 |
| C            | -3.799203 | -1.855571 | -1.347410 | C | 3.376564   | 3.000597  | -3.262966 |
| C            | -3.469153 | -2.371024 | -2.722547 | H | 3.123030   | 5.084749  | -2.835542 |
| H            | -3.259789 | -1.535326 | -3.401899 | H | 3.533616   | 0.861670  | -3.437962 |
| H            | -2.594160 | -3.026819 | -2.703764 | H | 3.791890   | 3.185711  | -4.250171 |
| H            | -4.307429 | -2.945936 | -3.133887 | O | 1.818646   | 2.267567  | 0.477696  |
| C            | -5.156215 | -1.199493 | -1.208934 | C | 2.174999   | 4.979209  | -0.187094 |
| H            | -5.175031 | -0.579060 | -0.299120 | C | 1.031345   | 4.521083  | 0.705896  |
| H            | -5.331326 | -0.522608 | -2.059782 | C | 0.924271   | 3.164261  | 1.005319  |
| C            | -6.294194 | -2.222136 | -1.127332 | C | 0.115928   | 5.379177  | 1.315105  |
| H            | -6.299560 | -2.842571 | -2.034374 | C | -0.065244  | 2.631384  | 1.834151  |
| H            | -6.078686 | -2.904033 | -0.294628 | C | -0.848401  | 4.892415  | 2.192243  |
| C            | -7.633416 | -1.569354 | -0.962065 | H | 0.160747   | 6.447153  | 1.115809  |
| H            | -8.180190 | -1.346492 | -1.881897 | C | -0.940599  | 3.528543  | 2.449217  |
| C            | -8.194798 | -1.200235 | 0.196396  | H | -1.537589  | 5.581462  | 2.673705  |
| C            | -9.536054 | -0.534457 | 0.240791  | H | -1.714930  | 3.156952  | 3.117012  |
| H            | -9.968075 | -0.410875 | -0.757914 |   |            |           |           |



|    |           |           |           |              |           |           |           |
|----|-----------|-----------|-----------|--------------|-----------|-----------|-----------|
| P  | 2.336113  | -0.242061 | -0.911449 | C            | 0.917963  | 0.357804  | 3.319071  |
| P  | -0.173366 | 0.801901  | 1.916179  | C            | 0.929998  | 1.069957  | 4.523170  |
| C  | 3.427016  | 5.170881  | 0.691746  | C            | 1.729515  | -0.769578 | 3.180333  |
| H  | 3.698991  | 4.243930  | 1.211021  | C            | 1.741374  | 0.652784  | 5.571496  |
| H  | 4.279364  | 5.479617  | 0.073400  | H            | 0.299604  | 1.951415  | 4.638471  |
| H  | 3.244002  | 5.944666  | 1.447956  | C            | 2.535971  | -1.192459 | 4.233598  |
| C  | 1.858174  | 6.299242  | -0.882109 | H            | 1.725357  | -1.319900 | 2.238609  |
| H  | 1.687144  | 7.092459  | -0.146983 | C            | 2.541849  | -0.480831 | 5.428638  |
| H  | 2.703249  | 6.627761  | -1.495973 | H            | 1.749108  | 1.210164  | 6.505407  |
| H  | 0.970973  | 6.222082  | -1.522171 | H            | 3.159933  | -2.076027 | 4.108340  |
| Cu | 0.227604  | -0.468189 | -0.020092 | H            | 3.171803  | -0.805420 | 6.253731  |
| C  | 2.667189  | -1.276023 | -2.384267 | B            | -1.080453 | 0.365565  | -1.373059 |
| C  | 3.889192  | -1.906062 | -2.628216 | O            | -1.326622 | 0.226097  | -2.718656 |
| C  | 1.623098  | -1.421559 | -3.305464 | O            | -1.512329 | 1.583156  | -0.899350 |
| C  | 4.054259  | -2.696676 | -3.762646 | C            | -1.625405 | 1.549691  | -3.237565 |
| H  | 4.711409  | -1.793157 | -1.924320 | C            | -2.169180 | 2.291208  | -1.976842 |
| C  | 1.795870  | -2.200861 | -4.444220 | C            | -0.308223 | 2.119435  | -3.739561 |
| H  | 0.667681  | -0.925921 | -3.124084 | H            | 0.115305  | 1.437910  | -4.487302 |
| C  | 3.008557  | -2.849018 | -4.668280 | H            | -0.440416 | 3.102678  | -4.206029 |
| H  | 5.005612  | -3.193417 | -3.938397 | H            | 0.417187  | 2.211990  | -2.921869 |
| H  | 0.978313  | -2.311524 | -5.152926 | C            | -2.610753 | 1.418739  | -4.378446 |
| H  | 3.139552  | -3.470627 | -5.550843 | H            | -2.892215 | 2.409541  | -4.757069 |
| C  | 3.719783  | -0.610685 | 0.230728  | H            | -2.148737 | 0.862041  | -5.201579 |
| C  | 3.881717  | -1.936800 | 0.654516  | H            | -3.521763 | 0.890814  | -4.078754 |
| C  | 4.535898  | 0.382285  | 0.776696  | C            | -1.788326 | 3.753453  | -1.869740 |
| C  | 4.850989  | -2.261226 | 1.595365  | H            | -2.203613 | 4.331242  | -2.705345 |
| H  | 3.251350  | -2.724221 | 0.241848  | H            | -2.195712 | 4.161925  | -0.935908 |
| C  | 5.494524  | 0.055653  | 1.732793  | H            | -0.700473 | 3.887308  | -1.847010 |
| H  | 4.426878  | 1.417213  | 0.455866  | C            | -3.663183 | 2.116607  | -1.768342 |
| C  | 5.655566  | -1.263637 | 2.143041  | H            | -3.935046 | 2.498756  | -0.776699 |
| H  | 4.972440  | -3.298277 | 1.904537  | H            | -4.248757 | 2.664088  | -2.515963 |
| H  | 6.123390  | 0.837774  | 2.151827  | H            | -3.939770 | 1.057640  | -1.808486 |
| H  | 6.408240  | -1.515344 | 2.886439  |              |           |           |           |
| C  | -1.857473 | 0.481215  | 2.563431  | <b>59-ts</b> |           |           |           |
| C  | -2.068234 | -0.562917 | 3.470266  | C            | -2.674892 | -3.969960 | -2.926101 |
| C  | -2.969519 | 1.122022  | 1.999811  | C            | -2.304315 | -3.799647 | -1.591558 |
| C  | -3.360380 | -0.958742 | 3.804997  | C            | -2.228882 | -2.488961 | -1.122751 |
| H  | -1.215667 | -1.078377 | 3.912695  | C            | -2.456398 | -1.366451 | -1.924220 |
| C  | -4.259012 | 0.735969  | 2.349002  | C            | -2.841810 | -1.584448 | -3.248433 |
| H  | -2.820497 | 1.906449  | 1.259744  | C            | -2.954360 | -2.879079 | -3.742866 |
| C  | -4.457829 | -0.310805 | 3.247256  | H            | -2.759746 | -4.972230 | -3.338974 |
| H  | -3.507823 | -1.774738 | 4.508379  | H            | -3.036645 | -0.733931 | -3.898038 |
| H  | -5.112247 | 1.246089  | 1.903788  | H            | -3.254913 | -3.040478 | -4.774851 |
| H  | -5.466811 | -0.618322 | 3.513361  | O            | -1.920013 | -2.236750 | 0.185996  |

|    |           |           |           |   |           |           |           |
|----|-----------|-----------|-----------|---|-----------|-----------|-----------|
| C  | -2.052069 | -4.953874 | -0.628384 | C | 0.812107  | -0.342992 | 4.599672  |
| C  | -1.102769 | -4.478446 | 0.465116  | C | 2.360860  | -0.464199 | 2.747985  |
| C  | -1.106413 | -3.134599 | 0.827298  | C | 1.878354  | -0.142765 | 5.472103  |
| C  | -0.266593 | -5.323205 | 1.199937  | H | -0.206523 | -0.373159 | 4.983901  |
| C  | -0.301724 | -2.602901 | 1.836907  | C | 3.422769  | -0.266735 | 3.623233  |
| C  | 0.520019  | -4.836163 | 2.238941  | H | 2.541272  | -0.585609 | 1.681329  |
| H  | -0.233205 | -6.384896 | 0.967208  | C | 3.182704  | -0.105442 | 4.985727  |
| C  | 0.508026  | -3.480649 | 2.555712  | H | 1.689206  | -0.014671 | 6.535551  |
| H  | 1.151528  | -5.518307 | 2.802413  | H | 4.438046  | -0.224954 | 3.232923  |
| H  | 1.144391  | -3.096741 | 3.351018  | H | 4.012297  | 0.055450  | 5.670573  |
| P  | -2.104831 | 0.297119  | -1.228780 | C | -1.806604 | -0.394101 | 2.940322  |
| P  | -0.282660 | -0.780289 | 2.008055  | C | -2.526816 | -1.331552 | 3.684552  |
| C  | -3.391069 | -5.337984 | 0.027066  | C | -2.228232 | 0.937482  | 2.918110  |
| H  | -3.831332 | -4.483091 | 0.554888  | C | -3.654283 | -0.934812 | 4.398639  |
| H  | -4.105637 | -5.675197 | -0.734503 | H | -2.203865 | -2.371914 | 3.710238  |
| H  | -3.242452 | -6.148745 | 0.751485  | C | -3.342275 | 1.335565  | 3.647161  |
| C  | -1.479723 | -6.164341 | -1.363601 | H | -1.679550 | 1.661433  | 2.313670  |
| H  | -1.313935 | -6.999946 | -0.676154 | C | -4.059076 | 0.397769  | 4.385488  |
| H  | -2.176186 | -6.529902 | -2.125019 | H | -4.215667 | -1.668702 | 4.972533  |
| H  | -0.527792 | -5.916904 | -1.851033 | H | -3.661338 | 2.375790  | 3.615867  |
| Cu | -0.136276 | 0.397126  | 0.029923  | H | -4.939411 | 0.703073  | 4.946819  |
| C  | -2.106908 | 1.335047  | -2.742043 | B | 1.315565  | -0.547001 | -1.089977 |
| C  | -3.131958 | 2.217361  | -3.085697 | O | 1.520797  | -0.663059 | -2.445017 |
| C  | -0.980241 | 1.239456  | -3.571098 | O | 1.954396  | -1.542136 | -0.389922 |
| C  | -3.023531 | 3.010326  | -4.226130 | C | 2.103981  | -1.966495 | -2.697707 |
| H  | -4.016422 | 2.299855  | -2.457899 | C | 2.726310  | -2.347504 | -1.313033 |
| C  | -0.879778 | 2.026344  | -4.712518 | C | 0.953965  | -2.868810 | -3.116249 |
| H  | -0.179755 | 0.539923  | -3.324399 | H | 0.447202  | -2.415649 | -3.976539 |
| C  | -1.896512 | 2.922934  | -5.036256 | H | 1.299261  | -3.868861 | -3.404316 |
| H  | -3.825991 | 3.699652  | -4.478710 | H | 0.213989  | -2.969732 | -2.312374 |
| H  | -0.001240 | 1.944574  | -5.348542 | C | 3.103564  | -1.839458 | -3.827736 |
| H  | -1.812886 | 3.547032  | -5.922831 | H | 3.607232  | -2.798260 | -4.004749 |
| C  | -3.627703 | 0.764539  | -0.326029 | H | 2.583084  | -1.557180 | -4.749712 |
| C  | -3.747054 | 2.090119  | 0.112551  | H | 3.863481  | -1.079650 | -3.619292 |
| C  | -4.624508 | -0.153706 | 0.008650  | C | 2.556994  | -3.804653 | -0.928825 |
| C  | -4.860532 | 2.495787  | 0.836283  | H | 3.053689  | -4.458681 | -1.657101 |
| H  | -2.966174 | 2.812372  | -0.122377 | H | 3.013742  | -3.977851 | 0.052400  |
| C  | -5.726235 | 0.249838  | 0.759711  | H | 1.500415  | -4.087123 | -0.857688 |
| H  | -4.551589 | -1.188585 | -0.322254 | C | 4.182933  | -1.946190 | -1.137711 |
| C  | -5.852123 | 1.574433  | 1.166029  | H | 4.456781  | -2.089564 | -0.085233 |
| H  | -4.943027 | 3.534608  | 1.152861  | H | 4.849408  | -2.562524 | -1.752450 |
| H  | -6.495666 | -0.475048 | 1.015726  | H | 4.358439  | -0.892650 | -1.380569 |
| H  | -6.718996 | 1.887003  | 1.743857  | C | 2.898977  | 1.488932  | -0.684217 |
| C  | 1.049019  | -0.506081 | 3.231771  | C | 3.879224  | 2.512151  | -0.260008 |

|              |           |           |           |    |           |           |           |
|--------------|-----------|-----------|-----------|----|-----------|-----------|-----------|
| C            | 3.509655  | 3.849162  | 0.316689  | C  | 0.404506  | 2.467961  | 1.824087  |
| H            | 2.468109  | 3.889549  | 0.640222  | C  | 1.407089  | 3.270121  | 2.373832  |
| H            | 4.148382  | 4.075309  | 1.179476  | C  | 1.359146  | 4.652438  | 2.227022  |
| H            | 3.674402  | 4.633725  | -0.431456 | H  | 0.312427  | 6.332019  | 1.403954  |
| C            | 5.264222  | 2.431091  | -0.860825 | H  | 2.238523  | 2.807128  | 2.901827  |
| H            | 5.390113  | 1.444699  | -1.330798 | H  | 2.143716  | 5.269290  | 2.657644  |
| H            | 5.377442  | 3.178559  | -1.659040 | O  | -1.648227 | 2.297592  | 0.691438  |
| C            | 6.357744  | 2.612866  | 0.200048  | C  | -1.920956 | 5.050870  | 0.242912  |
| H            | 6.400064  | 3.665502  | 0.509708  | C  | -2.338322 | 4.032053  | -0.809918 |
| H            | 6.061042  | 2.044048  | 1.093329  | C  | -2.228528 | 2.677798  | -0.493921 |
| C            | 7.708346  | 2.171198  | -0.278035 | C  | -2.894458 | 4.351464  | -2.048090 |
| H            | 8.356418  | 2.941643  | -0.702330 | C  | -2.680531 | 1.651042  | -1.325386 |
| C            | 8.165485  | 0.912204  | -0.260220 | C  | -3.346930 | 3.354697  | -2.908237 |
| C            | 9.527199  | 0.565215  | -0.779048 | H  | -2.988523 | 5.392548  | -2.346507 |
| H            | 10.065544 | 1.446748  | -1.142869 | C  | -3.253750 | 2.015392  | -2.545995 |
| H            | 10.137028 | 0.089962  | 0.002429  | H  | -3.784648 | 3.625910  | -3.865455 |
| H            | 9.463221  | -0.161867 | -1.600996 | H  | -3.612886 | 1.243725  | -3.223569 |
| C            | 7.379536  | -0.253742 | 0.261181  | P  | 0.404468  | 0.632468  | 1.811365  |
| H            | 6.364963  | 0.008341  | 0.581804  | P  | -2.381505 | -0.090017 | -0.825649 |
| H            | 7.294805  | -1.029745 | -0.513451 | C  | -3.078488 | 5.198418  | 1.249321  |
| H            | 7.896692  | -0.726890 | 1.108000  | H  | -3.323398 | 4.239956  | 1.722056  |
| O            | 3.584790  | 1.361872  | 0.548659  | H  | -2.802487 | 5.907738  | 2.039574  |
| C            | 1.402971  | 1.606430  | -0.684225 | H  | -3.976593 | 5.571249  | 0.741236  |
| H            | 1.063784  | 1.894279  | -1.686184 | C  | -1.625438 | 6.413826  | -0.371858 |
| C            | 0.718346  | 2.279484  | 0.409981  | H  | -2.513133 | 6.813986  | -0.873171 |
| H            | 1.173145  | 2.172101  | 1.397649  | H  | -1.356800 | 7.139829  | 0.402496  |
| C            | -0.241821 | 3.334351  | 0.278750  | H  | -0.807029 | 6.362668  | -1.100761 |
| C            | -0.763376 | 3.943036  | 1.455750  | Cu | -0.179849 | -0.465891 | -0.139586 |
| C            | -0.701806 | 3.863702  | -0.958289 | C  | 2.074946  | 0.242939  | 2.463139  |
| C            | -1.714868 | 4.935449  | 1.409574  | C  | 2.272091  | -0.429651 | 3.672191  |
| H            | -0.398646 | 3.592590  | 2.421886  | C  | 3.189912  | 0.613600  | 1.697322  |
| C            | -1.645055 | 4.867688  | -1.009169 | C  | 3.561773  | -0.711570 | 4.119343  |
| H            | -0.314623 | 3.468434  | -1.896418 | H  | 1.416985  | -0.728438 | 4.275939  |
| C            | -2.188187 | 5.413158  | 0.170298  | C  | 4.474352  | 0.360192  | 2.165975  |
| H            | -2.105067 | 5.362361  | 2.331691  | H  | 3.044982  | 1.097497  | 0.729710  |
| H            | -1.982265 | 5.244830  | -1.972970 | C  | 4.664462  | -0.305965 | 3.375255  |
| C            | -3.184156 | 6.421567  | 0.114533  | H  | 3.701170  | -1.237919 | 5.060697  |
| N            | -4.008481 | 7.248104  | 0.071672  | H  | 5.334571  | 0.675036  | 1.576766  |
| H            | 3.276154  | 0.827103  | -1.472513 | H  | 5.671426  | -0.511757 | 3.731628  |
|              |           |           |           | C  | -0.709250 | 0.204641  | 3.198179  |
| <b>60-ts</b> |           |           |           | C  | -1.447381 | -0.975502 | 3.093840  |
| C            | 0.318027  | 5.251301  | 1.522549  | C  | -0.798442 | 0.974528  | 4.362616  |
| C            | -0.714485 | 4.486932  | 0.980368  | C  | -2.247618 | -1.399111 | 4.150682  |
| C            | -0.649174 | 3.108153  | 1.171266  | H  | -1.400845 | -1.556492 | 2.171785  |

|   |           |           |           |   |           |           |           |
|---|-----------|-----------|-----------|---|-----------|-----------|-----------|
| C | -1.611814 | 0.558990  | 5.410691  | H | -0.309792 | 2.941761  | -3.742384 |
| H | -0.223089 | 1.895928  | 4.450526  | C | 2.287550  | 0.803174  | -4.483814 |
| C | -2.331162 | -0.630942 | 5.307493  | H | 1.681202  | 0.206797  | -5.174024 |
| H | -2.813407 | -2.324760 | 4.060772  | H | 2.905487  | 1.488175  | -5.075888 |
| H | -1.681115 | 1.161009  | 6.313754  | H | 2.954816  | 0.120705  | -3.944995 |
| H | -2.960986 | -0.955717 | 6.132611  | C | 2.522565  | -1.777017 | -1.473903 |
| C | -3.007779 | -1.020573 | -2.278402 | C | 3.668557  | -2.204353 | -0.655755 |
| C | -4.319912 | -1.494455 | -2.364817 | C | 3.570346  | -2.810128 | 0.722342  |
| C | -2.126786 | -1.257098 | -3.340214 | H | 2.808405  | -3.591589 | 0.749052  |
| C | -4.733052 | -2.222032 | -3.477289 | H | 4.528302  | -3.262896 | 1.006823  |
| H | -5.021777 | -1.308818 | -1.554300 | H | 3.333363  | -2.050598 | 1.475632  |
| C | -2.545640 | -1.976124 | -4.454848 | C | 4.991441  | -1.533440 | -0.961019 |
| H | -1.110808 | -0.865210 | -3.297155 | H | 4.911418  | -0.967940 | -1.901402 |
| C | -3.845922 | -2.470489 | -4.520360 | H | 5.189122  | -0.792254 | -0.171188 |
| H | -5.753392 | -2.594852 | -3.527538 | C | 6.175279  | -2.498477 | -1.061082 |
| H | -1.850237 | -2.157824 | -5.271174 | H | 6.234030  | -3.114929 | -0.153962 |
| H | -4.168703 | -3.044453 | -5.385844 | H | 5.985967  | -3.196740 | -1.887135 |
| C | -3.642565 | -0.432007 | 0.462616  | C | 7.470683  | -1.775035 | -1.280325 |
| C | -4.339787 | 0.566191  | 1.145300  | H | 7.785530  | -1.642473 | -2.318261 |
| C | -3.853778 | -1.771496 | 0.815653  | C | 8.242125  | -1.240968 | -0.324437 |
| C | -5.235677 | 0.230689  | 2.158192  | C | 9.507972  | -0.511116 | -0.655184 |
| H | -4.197306 | 1.613308  | 0.884205  | H | 9.700675  | -0.489365 | -1.732948 |
| C | -4.762769 | -2.104321 | 1.811296  | H | 9.473312  | 0.525765  | -0.291878 |
| H | -3.318579 | -2.564119 | 0.293302  | H | 10.372233 | -0.978899 | -0.162550 |
| C | -5.453790 | -1.102128 | 2.489767  | C | 7.929263  | -1.310697 | 1.140458  |
| H | -5.773114 | 1.018663  | 2.680865  | H | 8.728188  | -1.831282 | 1.686960  |
| H | -4.927100 | -3.152098 | 2.058513  | H | 7.878899  | -0.298474 | 1.568439  |
| H | -6.161103 | -1.360591 | 3.274352  | H | 6.981633  | -1.814502 | 1.361766  |
| B | 0.972597  | 0.349046  | -1.641804 | O | 3.169198  | -3.027536 | -1.718749 |
| O | 2.043866  | 1.156985  | -1.335983 | C | 1.046507  | -1.781923 | -1.179528 |
| O | 0.497472  | 0.588689  | -2.907548 | H | 0.509892  | -2.032125 | -2.103522 |
| C | 2.093585  | 2.210522  | -2.330588 | C | 0.502711  | -2.448606 | -0.000376 |
| C | 1.362078  | 1.564602  | -3.547282 | H | 1.095181  | -2.418121 | 0.912330  |
| C | 1.348404  | 3.396477  | -1.738084 | C | -0.578027 | -3.388318 | 0.011821  |
| H | 1.797393  | 3.645586  | -0.768798 | C | -0.965479 | -3.984304 | 1.245644  |
| H | 1.405456  | 4.279655  | -2.385365 | C | -1.305099 | -3.798437 | -1.137773 |
| H | 0.291376  | 3.155397  | -1.565909 | C | -2.034230 | -4.845085 | 1.339910  |
| C | 3.543223  | 2.572278  | -2.571812 | H | -0.402572 | -3.727905 | 2.143866  |
| H | 3.629375  | 3.315590  | -3.374323 | C | -2.377908 | -4.658785 | -1.049244 |
| H | 3.966896  | 3.008083  | -1.659507 | H | -1.021135 | -3.426476 | -2.119288 |
| H | 4.140482  | 1.694915  | -2.838799 | C | -2.780176 | -5.187079 | 0.193293  |
| C | 0.494926  | 2.513697  | -4.348790 | H | -2.314786 | -5.264755 | 2.304413  |
| H | 1.098321  | 3.329586  | -4.766245 | H | -2.925893 | -4.931882 | -1.949509 |
| H | 0.034681  | 1.972772  | -5.183252 | H | 2.792468  | -1.050619 | -2.246238 |

|           |           |           |           |    |           |           |           |
|-----------|-----------|-----------|-----------|----|-----------|-----------|-----------|
| C         | -3.904491 | -6.046442 | 0.291431  | H  | 1.842179  | -0.006064 | 1.665729  |
| N         | -4.832928 | -6.750035 | 0.377503  | C  | -4.019149 | -1.898459 | -3.812744 |
|           |           |           |           | C  | -4.082230 | -1.781696 | -2.425266 |
| <b>61</b> |           |           |           | C  | -3.297728 | -0.793047 | -1.834355 |
| C         | 4.098511  | -0.357291 | 0.049590  | C  | -2.446983 | 0.048613  | -2.553451 |
| C         | 5.209825  | -0.632592 | -0.867746 | C  | -2.429149 | -0.085161 | -3.944378 |
| C         | 4.976315  | -0.808946 | -2.344655 | C  | -3.211881 | -1.050926 | -4.567116 |
| H         | 4.875025  | -1.874132 | -2.589734 | H  | -4.609007 | -2.659048 | -4.318518 |
| H         | 4.070564  | -0.292276 | -2.676194 | H  | -1.779482 | 0.554377  | -4.538297 |
| H         | 5.818232  | -0.411495 | -2.924158 | H  | -3.187164 | -1.150833 | -5.649053 |
| C         | 6.467240  | -1.262353 | -0.318587 | O  | -3.318307 | -0.628109 | -0.471281 |
| H         | 6.461843  | -1.154372 | 0.775413  | C  | -4.970263 | -2.624456 | -1.520170 |
| H         | 6.469863  | -2.342341 | -0.529755 | C  | -4.218349 | -2.832635 | -0.211989 |
| C         | 7.741715  | -0.611339 | -0.867656 | C  | -3.452710 | -1.774734 | 0.273403  |
| H         | 7.853572  | -0.854028 | -1.933064 | C  | -4.274756 | -3.985737 | 0.570310  |
| H         | 7.613799  | 0.479204  | -0.814212 | C  | -2.772875 | -1.809019 | 1.492504  |
| C         | 8.972150  | -1.040790 | -0.126368 | C  | -3.610187 | -4.057210 | 1.791781  |
| H         | 9.507729  | -1.903884 | -0.529753 | H  | -4.849858 | -4.843167 | 0.229792  |
| C         | 9.441087  | -0.489100 | 1.000617  | C  | -2.872434 | -2.973505 | 2.258045  |
| C         | 10.670738 | -1.014036 | 1.676296  | H  | -3.673277 | -4.963757 | 2.388044  |
| H         | 11.110737 | -1.856992 | 1.132981  | H  | -2.351614 | -3.037808 | 3.211980  |
| H         | 11.435553 | -0.229742 | 1.768654  | P  | -1.293028 | 1.122095  | -1.618673 |
| H         | 10.447717 | -1.344613 | 2.700684  | P  | -1.723970 | -0.368117 | 1.925328  |
| C         | 8.797512  | 0.676852  | 1.688810  | C  | -6.253735 | -1.826911 | -1.217626 |
| H         | 7.877282  | 1.015501  | 1.202043  | H  | -6.028006 | -0.866602 | -0.739148 |
| H         | 8.549135  | 0.417704  | 2.727626  | H  | -6.800223 | -1.626857 | -2.147799 |
| H         | 9.490094  | 1.528424  | 1.744777  | H  | -6.904477 | -2.400596 | -0.545932 |
| O         | 4.979823  | 0.689168  | -0.358252 | C  | -5.351843 | -3.946442 | -2.174499 |
| C         | 2.647515  | -0.271855 | -0.354154 | H  | -6.005039 | -4.531876 | -1.518525 |
| C         | 1.777799  | 0.453403  | 0.669838  | H  | -5.915064 | -3.771980 | -3.097462 |
| C         | 1.765962  | 1.897861  | 0.735438  | H  | -4.466955 | -4.549059 | -2.414237 |
| C         | 1.261975  | 2.550523  | 1.898145  | Cu | -0.228044 | 0.283475  | 0.266482  |
| C         | 2.157513  | 2.744065  | -0.338349 | C  | -0.148126 | 1.712139  | -2.918086 |
| C         | 1.110393  | 3.917423  | 1.965765  | C  | -0.174749 | 3.000049  | -3.454229 |
| H         | 0.979326  | 1.933174  | 2.753253  | C  | 0.834571  | 0.808486  | -3.343559 |
| C         | 2.016277  | 4.113845  | -0.271443 | C  | 0.782450  | 3.387846  | -4.389416 |
| H         | 2.599662  | 2.300769  | -1.229236 | H  | -0.933562 | 3.710405  | -3.130843 |
| C         | 1.476028  | 4.731069  | 0.874020  | C  | 1.775199  | 1.193172  | -4.292111 |
| H         | 0.703458  | 4.378815  | 2.864646  | H  | 0.866827  | -0.200659 | -2.925185 |
| H         | 2.318720  | 4.730522  | -1.116172 | C  | 1.757235  | 2.488004  | -4.808171 |
| C         | 1.279263  | 6.135062  | 0.922502  | H  | 0.761750  | 4.397188  | -4.793773 |
| N         | 1.101470  | 7.288979  | 0.963430  | H  | 2.529012  | 0.482581  | -4.624918 |
| H         | 4.241916  | -0.668740 | 1.093781  | H  | 2.502978  | 2.794230  | -5.537910 |
| H         | 2.578625  | 0.241060  | -1.322784 | C  | -2.272424 | 2.584985  | -1.131135 |

|   |           |           |           |           |           |           |           |
|---|-----------|-----------|-----------|-----------|-----------|-----------|-----------|
| C | -1.591059 | 3.604276  | -0.454854 | H         | 1.993090  | -4.523747 | -2.850674 |
| C | -3.649518 | 2.695823  | -1.329893 | C         | 0.413793  | -4.503057 | 0.809464  |
| C | -2.269877 | 4.730444  | -0.009185 | H         | 0.000924  | -5.413141 | 0.355792  |
| H | -0.518113 | 3.516754  | -0.282480 | H         | 0.928899  | -4.790466 | 1.733896  |
| C | -4.332732 | 3.814851  | -0.858191 | H         | -0.416949 | -3.840021 | 1.075092  |
| H | -4.192561 | 1.912214  | -1.856193 | C         | 2.626196  | -4.709902 | -0.316358 |
| C | -3.646047 | 4.833876  | -0.205281 | H         | 3.108918  | -4.849670 | 0.656924  |
| H | -1.723389 | 5.520216  | 0.504913  | H         | 2.366044  | -5.696276 | -0.716795 |
| H | -5.406679 | 3.892933  | -1.010923 | H         | 3.352614  | -4.239608 | -0.990789 |
| H | -4.184053 | 5.707815  | 0.154922  |           |           |           |           |
| C | -0.951549 | -0.921214 | 3.486545  | <b>62</b> |           |           |           |
| C | -1.509577 | -0.683324 | 4.745036  | C         | -4.030598 | -2.351707 | -3.572682 |
| C | 0.224881  | -1.673203 | 3.382517  | C         | -3.973898 | -2.228855 | -2.184726 |
| C | -0.898251 | -1.193988 | 5.886616  | C         | -3.264032 | -1.143449 | -1.675038 |
| H | -2.427874 | -0.104407 | 4.832625  | C         | -2.598473 | -0.211773 | -2.474285 |
| C | 0.824483  | -2.192932 | 4.525115  | C         | -2.695222 | -0.359566 | -3.859916 |
| H | 0.667564  | -1.857694 | 2.401275  | C         | -3.409900 | -1.421591 | -4.402893 |
| C | 0.265196  | -1.951051 | 5.777578  | H         | -4.572047 | -3.181842 | -4.020098 |
| H | -1.335921 | -1.004954 | 6.864118  | H         | -2.189000 | 0.348895  | -4.512388 |
| H | 1.734166  | -2.782780 | 4.436536  | H         | -3.479350 | -1.531182 | -5.481937 |
| H | 0.737885  | -2.351365 | 6.671490  | O         | -3.178333 | -0.952101 | -0.318744 |
| C | -2.926169 | 0.908272  | 2.448850  | C         | -4.679274 | -3.153213 | -1.201236 |
| C | -4.261922 | 0.621020  | 2.743671  | C         | -3.833620 | -3.226191 | 0.063663  |
| C | -2.459488 | 2.219957  | 2.579693  | C         | -3.148605 | -2.080477 | 0.462541  |
| C | -5.116933 | 1.635021  | 3.165275  | C         | -3.754561 | -4.334763 | 0.907302  |
| H | -4.635010 | -0.397813 | 2.645413  | C         | -2.411115 | -1.992282 | 1.645652  |
| C | -3.312138 | 3.227208  | 3.017031  | C         | -3.044614 | -4.278501 | 2.103926  |
| H | -1.424880 | 2.457442  | 2.323644  | H         | -4.267536 | -5.255432 | 0.639682  |
| C | -4.642493 | 2.936211  | 3.306613  | C         | -2.382233 | -3.113690 | 2.477330  |
| H | -6.156301 | 1.406033  | 3.389420  | H         | -3.010662 | -5.150969 | 2.751202  |
| H | -2.937986 | 4.244027  | 3.117196  | H         | -1.819500 | -3.078909 | 3.408695  |
| H | -5.312417 | 3.725710  | 3.639199  | P         | -1.514435 | 1.015504  | -1.653314 |
| B | 2.019847  | -1.692353 | -0.553243 | P         | -1.485304 | -0.441476 | 1.956392  |
| O | 1.548329  | -2.157558 | -1.758120 | C         | -6.034473 | -2.517346 | -0.834703 |
| O | 1.851662  | -2.600243 | 0.465622  | H         | -5.904173 | -1.515873 | -0.406786 |
| C | 0.780392  | -3.351388 | -1.481221 | H         | -6.662911 | -2.429399 | -1.729854 |
| C | 1.394866  | -3.835490 | -0.131504 | H         | -6.558396 | -3.140041 | -0.098755 |
| C | -0.672650 | -2.915343 | -1.368655 | C         | -4.925422 | -4.533903 | -1.798846 |
| H | -0.968000 | -2.423136 | -2.305097 | H         | -5.455359 | -5.175167 | -1.086876 |
| H | -1.349857 | -3.762594 | -1.197527 | H         | -5.563540 | -4.465666 | -2.686055 |
| H | -0.815316 | -2.188869 | -0.553992 | H         | -3.987129 | -5.026961 | -2.081314 |
| C | 0.940716  | -4.319503 | -2.634013 | Cu        | -0.233804 | 0.348188  | 0.159303  |
| H | 0.437190  | -5.268507 | -2.411403 | C         | -0.565415 | 1.719545  | -3.048682 |
| H | 0.482897  | -3.897618 | -3.535582 | C         | -0.816051 | 2.974920  | -3.604703 |

|   |           |           |           |   |           |           |           |
|---|-----------|-----------|-----------|---|-----------|-----------|-----------|
| C | 0.504963  | 0.955098  | -3.530409 | O | 1.834950  | -2.286680 | 0.207890  |
| C | 0.011732  | 3.473310  | -4.607906 | C | 1.046408  | -3.226958 | -1.783958 |
| H | -1.649195 | 3.575378  | -3.244003 | C | 1.569183  | -3.587216 | -0.359814 |
| C | 1.321217  | 1.450071  | -4.540744 | C | -0.445789 | -2.934913 | -1.821457 |
| H | 0.706612  | -0.030833 | -3.105058 | H | -0.693087 | -2.484323 | -2.791038 |
| C | 1.082724  | 2.716356  | -5.072290 | H | -1.044770 | -3.847043 | -1.703427 |
| H | -0.182986 | 4.457469  | -5.027733 | H | -0.742485 | -2.226949 | -1.033573 |
| H | 2.153151  | 0.851134  | -4.904423 | C | 1.406119  | -4.221545 | -2.866987 |
| H | 1.731233  | 3.110858  | -5.850958 | H | 0.973047  | -5.204820 | -2.644930 |
| C | -2.628255 | 2.355734  | -1.101585 | H | 1.000228  | -3.883361 | -3.826872 |
| C | -2.027426 | 3.510752  | -0.586439 | H | 2.488715  | -4.332470 | -2.975367 |
| C | -4.019286 | 2.241873  | -1.086168 | C | 0.570212  | -4.310612 | 0.518128  |
| C | -2.805584 | 4.549364  | -0.092246 | H | 0.301692  | -5.281029 | 0.081536  |
| H | -0.940705 | 3.598840  | -0.582805 | H | 1.011818  | -4.493972 | 1.505331  |
| C | -4.796869 | 3.276541  | -0.570822 | H | -0.344704 | -3.725805 | 0.661212  |
| H | -4.499256 | 1.345446  | -1.477399 | C | 2.897600  | -4.329398 | -0.374369 |
| C | -4.194142 | 4.430617  | -0.079583 | H | 3.288871  | -4.367673 | 0.647988  |
| H | -2.323917 | 5.446924  | 0.293285  | H | 2.787348  | -5.357223 | -0.737986 |
| H | -5.880235 | 3.181118  | -0.561481 | H | 3.638255  | -3.812843 | -0.997489 |
| H | -4.806571 | 5.236917  | 0.317636  | C | 4.127114  | -0.056719 | -0.539267 |
| C | -0.533208 | -0.852377 | 3.461153  | C | 5.091963  | 0.698122  | 0.275402  |
| C | -0.951202 | -0.521735 | 4.752326  | C | 4.709806  | 1.784219  | 1.243220  |
| C | 0.666982  | -1.550923 | 3.278358  | H | 3.773885  | 1.552423  | 1.753277  |
| C | -0.177012 | -0.889071 | 5.850038  | H | 5.490359  | 1.911620  | 2.002962  |
| H | -1.884242 | 0.019859  | 4.901726  | H | 4.589991  | 2.743071  | 0.723333  |
| C | 1.427330  | -1.929590 | 4.379402  | C | 6.520666  | 0.755561  | -0.219711 |
| H | 1.001899  | -1.799681 | 2.269291  | H | 6.653005  | -0.004408 | -1.002566 |
| C | 1.008409  | -1.594811 | 5.665317  | H | 6.714348  | 1.730688  | -0.690665 |
| H | -0.504045 | -0.625666 | 6.853295  | C | 7.541727  | 0.489711  | 0.894368  |
| H | 2.355578  | -2.476826 | 4.231565  | H | 7.602392  | 1.359055  | 1.562134  |
| H | 1.609104  | -1.881510 | 6.525438  | H | 7.164310  | -0.340625 | 1.508146  |
| C | -2.771251 | 0.719482  | 2.545645  | C | 8.907859  | 0.173072  | 0.362349  |
| C | -4.027712 | 0.303293  | 2.993784  | H | 9.606248  | 1.008810  | 0.274013  |
| C | -2.449700 | 2.079757  | 2.567637  | C | 9.325306  | -1.032332 | -0.046705 |
| C | -4.946287 | 1.238115  | 3.462707  | C | 10.706974 | -1.241906 | -0.586560 |
| H | -4.286239 | -0.755016 | 2.983422  | H | 11.295398 | -0.318254 | -0.581817 |
| C | -3.364310 | 3.009752  | 3.048532  | H | 11.249406 | -1.996715 | 0.000467  |
| H | -1.478267 | 2.414273  | 2.199595  | H | 10.674885 | -1.622775 | -1.617325 |
| C | -4.614488 | 2.590069  | 3.494657  | C | 8.471060  | -2.264066 | -0.017025 |
| H | -5.922841 | 0.907694  | 3.809295  | H | 7.456037  | -2.080823 | 0.349815  |
| H | -3.102363 | 4.066081  | 3.056568  | H | 8.388781  | -2.695119 | -1.024948 |
| H | -5.333765 | 3.317536  | 3.863876  | H | 8.928741  | -3.042115 | 0.610126  |
| B | 2.047881  | -1.419610 | -0.836690 | O | 4.693981  | -0.634436 | 0.636275  |
| O | 1.722205  | -1.974992 | -2.051358 | C | 2.612944  | 0.036350  | -0.664060 |

|           |           |           |           |    |           |           |           |
|-----------|-----------|-----------|-----------|----|-----------|-----------|-----------|
| H         | 2.429719  | 0.538085  | -1.627824 | C  | 5.198581  | -4.526692 | -0.454835 |
| C         | 1.788740  | 0.698832  | 0.425799  | H  | 6.241092  | -4.323696 | -0.720878 |
| H         | 1.930625  | 0.243764  | 1.413761  | H  | 5.207881  | -5.450458 | 0.132822  |
| C         | 1.591825  | 2.122819  | 0.475786  | H  | 4.630959  | -4.705503 | -1.376332 |
| C         | 1.108360  | 2.733212  | 1.672746  | Cu | 0.178667  | 0.326896  | -0.148082 |
| C         | 1.808955  | 3.000154  | -0.625703 | C  | -1.698501 | -1.813080 | 1.813158  |
| C         | 0.804928  | 4.073279  | 1.745229  | C  | -2.462307 | -1.659118 | 2.971829  |
| H         | 0.974454  | 2.101831  | 2.553334  | C  | -2.303898 | -2.328322 | 0.657991  |
| C         | 1.520763  | 4.346040  | -0.551577 | C  | -3.812613 | -2.007380 | 2.975028  |
| H         | 2.213537  | 2.602337  | -1.555526 | H  | -2.006415 | -1.255721 | 3.874970  |
| C         | 0.995100  | 4.912417  | 0.627434  | C  | -3.644048 | -2.693129 | 0.670972  |
| H         | 0.416875  | 4.495737  | 2.671367  | H  | -1.727332 | -2.413723 | -0.266073 |
| H         | 1.694107  | 4.984567  | -1.416175 | C  | -4.404939 | -2.522533 | 1.827222  |
| C         | 0.643349  | 6.284379  | 0.684640  | H  | -4.400537 | -1.873425 | 3.880203  |
| N         | 0.338210  | 7.411354  | 0.733406  | H  | -4.105057 | -3.089938 | -0.231853 |
| H         | 4.559971  | -0.482731 | -1.458609 | H  | -5.462447 | -2.781038 | 1.823727  |
|           |           |           |           | C  | 0.447775  | -0.620232 | 3.335472  |
| <b>63</b> |           |           |           | C  | 0.280534  | 0.736790  | 3.624341  |
| C         | 2.633255  | -4.940598 | 0.928447  | C  | 0.895249  | -1.486045 | 4.338472  |
| C         | 3.169680  | -3.663081 | 0.765970  | C  | 0.546567  | 1.221371  | 4.901118  |
| C         | 2.333000  | -2.586726 | 1.052416  | H  | -0.051853 | 1.420778  | 2.841870  |
| C         | 1.007283  | -2.730400 | 1.469723  | C  | 1.172031  | -0.996965 | 5.610872  |
| C         | 0.514583  | -4.025176 | 1.639352  | H  | 1.025051  | -2.546366 | 4.124527  |
| C         | 1.324716  | -5.122576 | 1.367627  | C  | 0.996062  | 0.355745  | 5.893561  |
| H         | 3.243997  | -5.814400 | 0.715849  | H  | 0.417777  | 2.281147  | 5.111601  |
| H         | -0.512739 | -4.170726 | 1.968187  | H  | 1.524101  | -1.674773 | 6.385084  |
| H         | 0.934138  | -6.128581 | 1.497213  | H  | 1.212697  | 0.735193  | 6.889462  |
| O         | 2.790426  | -1.299133 | 0.912414  | C  | 2.507786  | 2.662742  | -1.511386 |
| C         | 4.608626  | -3.376721 | 0.355543  | C  | 3.330060  | 3.762035  | -1.248888 |
| C         | 4.623455  | -2.070365 | -0.428820 | C  | 1.850025  | 2.570399  | -2.741517 |
| C         | 3.711662  | -1.075102 | -0.080055 | C  | 3.481959  | 4.763891  | -2.202645 |
| C         | 5.535561  | -1.768019 | -1.440024 | H  | 3.849183  | 3.837588  | -0.294433 |
| C         | 3.664382  | 0.177368  | -0.700233 | C  | 2.011855  | 3.570004  | -3.696283 |
| C         | 5.540988  | -0.519751 | -2.056231 | H  | 1.206325  | 1.714512  | -2.951164 |
| H         | 6.264595  | -2.513128 | -1.748391 | C  | 2.822040  | 4.669503  | -3.425319 |
| C         | 4.612860  | 0.448081  | -1.689970 | H  | 4.117480  | 5.620165  | -1.989509 |
| H         | 6.270197  | -0.304461 | -2.832755 | H  | 1.495592  | 3.493018  | -4.650714 |
| H         | 4.601826  | 1.410866  | -2.197221 | H  | 2.940588  | 5.454926  | -4.168276 |
| P         | 0.018158  | -1.200540 | 1.654965  | C  | 2.705088  | 2.083947  | 1.285324  |
| P         | 2.268448  | 1.301474  | -0.311165 | C  | 3.787933  | 1.704077  | 2.077991  |
| C         | 5.450976  | -3.184513 | 1.631142  | C  | 1.863511  | 3.113085  | 1.723122  |
| H         | 5.069379  | -2.362844 | 2.248415  | C  | 4.017394  | 2.341648  | 3.296143  |
| H         | 5.436688  | -4.100361 | 2.235339  | H  | 4.464145  | 0.916918  | 1.747229  |
| H         | 6.490945  | -2.957325 | 1.364894  | C  | 2.101226  | 3.756699  | 2.929580  |



|   |           |           |           |              |            |           |           |
|---|-----------|-----------|-----------|--------------|------------|-----------|-----------|
| H | 1.017419  | 3.420341  | 1.108462  | H            | -10.291474 | -1.373141 | 1.770507  |
| C | 3.179183  | 3.366635  | 3.723050  | C            | -7.996657  | 0.213193  | 1.654475  |
| H | 4.864098  | 2.039777  | 3.908382  | H            | -8.825599  | 0.695601  | 2.190637  |
| H | 1.438577  | 4.560311  | 3.247606  | H            | -7.367184  | -0.257299 | 2.424215  |
| H | 3.365872  | 3.862520  | 4.672893  | H            | -7.401593  | 0.996744  | 1.174359  |
| B | -1.087346 | -0.498879 | -2.925616 | O            | -4.527831  | 0.109673  | -3.199490 |
| O | -1.141196 | -1.872192 | -2.858598 | C            | -2.166392  | 0.439519  | -2.291067 |
| O | 0.042310  | -0.050601 | -3.568291 | H            | -2.237397  | 1.375360  | -2.865485 |
| C | 0.142864  | -2.378980 | -3.284930 | C            | -1.727101  | 0.732378  | -0.838809 |
| C | 0.710447  | -1.199026 | -4.137399 | H            | -2.318634  | 0.130882  | -0.135063 |
| C | 0.952250  | -2.647095 | -2.027081 | C            | -1.577380  | 2.088219  | -0.372164 |
| H | 0.416838  | -3.367947 | -1.396601 | C            | -1.827270  | 2.406308  | 0.996380  |
| H | 1.940412  | -3.063635 | -2.259270 | C            | -1.122502  | 3.160952  | -1.190752 |
| H | 1.089319  | -1.723059 | -1.445332 | C            | -1.612906  | 3.667208  | 1.507110  |
| C | -0.068350 | -3.670843 | -4.046563 | H            | -2.215298  | 1.620450  | 1.647126  |
| H | 0.883129  | -4.044387 | -4.445298 | C            | -0.904283  | 4.422149  | -0.683581 |
| H | -0.473263 | -4.431980 | -3.370501 | H            | -0.901023  | 2.966561  | -2.239597 |
| H | -0.770156 | -3.544392 | -4.875632 | C            | -1.140681  | 4.705275  | 0.678272  |
| C | 2.207794  | -1.000578 | -4.022353 | H            | -1.806907  | 3.870440  | 2.559691  |
| H | 2.746544  | -1.888420 | -4.378101 | H            | -0.529609  | 5.209694  | -1.336076 |
| H | 2.517509  | -0.147419 | -4.638278 | H            | -3.485540  | -1.286789 | -2.002558 |
| H | 2.513822  | -0.799666 | -2.990072 | C            | -0.880406  | 5.991889  | 1.215042  |
| C | 0.299523  | -1.259199 | -5.600443 | N            | -0.660907  | 7.046466  | 1.667379  |
| H | 0.563348  | -0.309623 | -6.078760 |              |            |           |           |
| H | 0.816362  | -2.065582 | -6.132864 | <b>64-ts</b> |            |           |           |
| H | -0.781576 | -1.403658 | -5.709067 | C            | -2.666811  | 0.461278  | 0.425045  |
| C | -3.528330 | -0.213858 | -2.234067 | C            | -2.837825  | 1.558918  | 1.377119  |
| C | -4.757411 | 0.461782  | -1.824469 | C            | -2.610630  | 1.294794  | 2.848339  |
| C | -4.794851 | 1.938183  | -1.542668 | H            | -3.508274  | 0.860777  | 3.307258  |
| H | -3.900331 | 2.448496  | -1.911453 | H            | -1.771839  | 0.608564  | 3.006982  |
| H | -5.671004 | 2.397877  | -2.016299 | H            | -2.385677  | 2.231054  | 3.375171  |
| H | -4.866601 | 2.117198  | -0.461141 | C            | -3.942422  | 2.568818  | 1.105518  |
| C | -5.795995 | -0.372597 | -1.116068 | H            | -4.147088  | 2.566942  | 0.024941  |
| H | -5.695325 | -1.415307 | -1.452169 | H            | -4.875143  | 2.278805  | 1.610966  |
| H | -5.557152 | -0.374510 | -0.039263 | C            | -3.512714  | 3.983597  | 1.518739  |
| C | -7.244246 | 0.079219  | -1.304974 | H            | -3.618179  | 4.104737  | 2.605396  |
| H | -7.363394 | 1.105952  | -0.931106 | H            | -2.437318  | 4.076079  | 1.299140  |
| H | -7.468073 | 0.116764  | -2.380598 | C            | -4.276948  | 5.064402  | 0.813903  |
| C | -8.191894 | -0.850734 | -0.606736 | H            | -5.138248  | 5.484873  | 1.339012  |
| H | -8.604300 | -1.664747 | -1.207983 | C            | -4.010967  | 5.528306  | -0.414681 |
| C | -8.510513 | -0.816559 | 0.693939  | C            | -4.846108  | 6.600961  | -1.044765 |
| C | -9.412823 | -1.843629 | 1.306848  | H            | -5.651740  | 6.937733  | -0.383430 |
| H | -9.764269 | -2.574976 | 0.571412  | H            | -4.233441  | 7.474828  | -1.309392 |
| H | -8.897661 | -2.387959 | 2.111808  | H            | -5.298118  | 6.250185  | -1.983571 |

|   |           |           |           |    |           |           |           |
|---|-----------|-----------|-----------|----|-----------|-----------|-----------|
| C | -2.882884 | 5.028772  | -1.268124 | C  | 6.233517  | -0.106332 | -1.461628 |
| H | -2.329621 | 4.196130  | -0.818354 | H  | 5.732300  | 0.844387  | -1.244566 |
| H | -3.268689 | 4.688138  | -2.240366 | H  | 7.090753  | -0.205069 | -0.783761 |
| H | -2.170052 | 5.836130  | -1.491286 | H  | 6.605132  | -0.069895 | -2.493469 |
| O | -1.681476 | 1.874310  | 0.629244  | C  | 6.016967  | -2.594337 | -1.594727 |
| C | -2.014204 | -0.802174 | 0.626240  | H  | 6.406648  | -2.587237 | -2.617652 |
| C | -2.354145 | -1.889990 | -0.410367 | H  | 6.883976  | -2.718786 | -0.938139 |
| C | -3.707300 | -2.506253 | -0.161953 | H  | 5.359809  | -3.465564 | -1.477016 |
| C | -4.794465 | -2.197463 | -0.989047 | Cu | -0.145805 | 0.071413  | 0.350624  |
| C | -3.925248 | -3.359755 | 0.929850  | C  | 0.972217  | -0.136061 | 3.637330  |
| C | -6.057865 | -2.712493 | -0.742698 | C  | 1.359665  | 0.535448  | 4.800169  |
| H | -4.640418 | -1.536266 | -1.841862 | C  | 0.163878  | -1.273708 | 3.737957  |
| C | -5.179402 | -3.885035 | 1.189257  | C  | 0.943869  | 0.073895  | 6.045709  |
| H | -3.087184 | -3.614524 | 1.576030  | H  | 1.988909  | 1.422255  | 4.729701  |
| C | -6.257115 | -3.562376 | 0.352153  | C  | -0.243532 | -1.738342 | 4.984130  |
| H | -6.894860 | -2.463797 | -1.390569 | H  | -0.156949 | -1.780063 | 2.825963  |
| H | -5.337741 | -4.549364 | 2.035353  | C  | 0.143878  | -1.062156 | 6.138451  |
| C | -7.553204 | -4.101280 | 0.613307  | H  | 1.245323  | 0.603385  | 6.946599  |
| N | -8.610364 | -4.541364 | 0.826063  | H  | -0.873685 | -2.621935 | 5.053525  |
| H | -3.139949 | 0.629873  | -0.548365 | H  | -0.183067 | -1.418550 | 7.112549  |
| H | -2.049497 | -1.179607 | 1.655806  | C  | 1.906717  | 2.155476  | 2.188103  |
| H | -2.385755 | -1.402359 | -1.395495 | C  | 0.844825  | 3.053720  | 2.361267  |
| C | 5.395600  | -1.942124 | 1.212160  | C  | 3.218130  | 2.633365  | 2.198440  |
| C | 4.762306  | -1.290101 | 0.153078  | C  | 1.098474  | 4.403937  | 2.567212  |
| C | 3.630113  | -0.538871 | 0.462987  | H  | -0.182099 | 2.690890  | 2.295830  |
| C | 3.089430  | -0.451029 | 1.749471  | C  | 3.466319  | 3.991968  | 2.384489  |
| C | 3.760590  | -1.109970 | 2.780445  | H  | 4.050383  | 1.942573  | 2.069628  |
| C | 4.910015  | -1.845644 | 2.512416  | C  | 2.409924  | 4.876093  | 2.578195  |
| H | 6.289058  | -2.532935 | 1.025553  | H  | 0.268305  | 5.094354  | 2.704640  |
| H | 3.368360  | -1.062968 | 3.794421  | H  | 4.491064  | 4.356460  | 2.388725  |
| H | 5.427562  | -2.355479 | 3.320989  | H  | 2.607106  | 5.934542  | 2.732587  |
| O | 2.970863  | 0.157779  | -0.515431 | C  | -0.858098 | 0.790876  | -3.013795 |
| C | 5.274586  | -1.297240 | -1.282167 | C  | -1.534254 | 1.961634  | -3.370456 |
| C | 4.088366  | -1.106295 | -2.220436 | C  | -1.344436 | -0.440873 | -3.472302 |
| C | 2.989540  | -0.370240 | -1.782025 | C  | -2.671325 | 1.900378  | -4.172642 |
| C | 4.051999  | -1.573519 | -3.535185 | H  | -1.180009 | 2.928255  | -3.012675 |
| C | 1.865598  | -0.111418 | -2.573323 | C  | -2.472961 | -0.496172 | -4.282605 |
| C | 2.966495  | -1.307374 | -4.363250 | H  | -0.849696 | -1.365424 | -3.172959 |
| H | 4.887817  | -2.147661 | -3.927579 | C  | -3.142832 | 0.674472  | -4.631476 |
| C | 1.879341  | -0.580811 | -3.887195 | H  | -3.188357 | 2.818036  | -4.444501 |
| H | 2.968514  | -1.667904 | -5.388735 | H  | -2.837175 | -1.459649 | -4.633336 |
| H | 1.030670  | -0.381233 | -4.537906 | H  | -4.030111 | 0.630931  | -5.258714 |
| P | 1.472200  | 0.393223  | 1.954745  | C  | 1.100884  | 2.540110  | -1.848734 |
| P | 0.492918  | 0.809589  | -1.775439 | C  | 2.032178  | 2.967268  | -2.801171 |

|           |           |           |           |              |           |           |           |
|-----------|-----------|-----------|-----------|--------------|-----------|-----------|-----------|
| C         | 0.586215  | 3.460619  | -0.930547 | C            | 2.956725  | 0.513797  | -0.518590 |
| C         | 2.446275  | 4.294722  | -2.830398 | H            | 3.103795  | 0.993938  | -1.491481 |
| H         | 2.437814  | 2.258715  | -3.522660 | C            | 3.910507  | -0.330290 | -0.104121 |
| C         | 0.999354  | 4.790013  | -0.968116 | C            | 5.131010  | -0.584148 | -0.937436 |
| H         | -0.148694 | 3.133013  | -0.193488 | H            | 5.122342  | -0.010629 | -1.870308 |
| C         | 1.930828  | 5.208096  | -1.913348 | H            | 6.045324  | -0.324975 | -0.384916 |
| H         | 3.173731  | 4.617878  | -3.571778 | H            | 5.219179  | -1.650123 | -1.190756 |
| H         | 0.596414  | 5.494467  | -0.241763 | C            | 3.883043  | -1.093090 | 1.184980  |
| H         | 2.257314  | 6.245406  | -1.936737 | H            | 2.985881  | -0.913983 | 1.782864  |
| B         | -1.156932 | -2.903115 | -0.449027 | H            | 3.949043  | -2.172795 | 0.991836  |
| O         | -0.793344 | -3.718308 | 0.596583  | H            | 4.757087  | -0.839923 | 1.801151  |
| O         | -0.343139 | -3.061637 | -1.546678 | O            | -1.091092 | -0.166378 | 1.212489  |
| C         | 0.490988  | -4.294076 | 0.259345  | C            | -3.333562 | -0.180933 | 0.158875  |
| C         | 0.495313  | -4.213926 | -1.296846 | H            | -3.660880 | 0.660815  | 0.772389  |
| C         | 1.553164  | -3.414025 | 0.896220  | C            | -4.238318 | -0.950219 | -0.450093 |
| H         | 1.382093  | -3.368618 | 1.978725  | H            | -3.883725 | -1.799120 | -1.041185 |
| H         | 2.561817  | -3.809749 | 0.724889  | H            | -1.622664 | -1.341959 | -0.479049 |
| H         | 1.506794  | -2.387311 | 0.506716  | C            | -5.712070 | -0.744694 | -0.390137 |
| C         | 0.566361  | -5.695677 | 0.826898  | H            | -6.219508 | -1.622609 | 0.029599  |
| H         | 1.493638  | -6.189242 | 0.510636  | H            | -5.970605 | 0.124926  | 0.223858  |
| H         | 0.566162  | -5.649212 | 1.921540  | H            | -6.135531 | -0.592834 | -1.391217 |
| H         | -0.281954 | -6.310601 | 0.513027  |              |           |           |           |
| C         | 1.855625  | -3.980181 | -1.918752 | <b>66-ts</b> |           |           |           |
| H         | 2.531014  | -4.817820 | -1.700868 | C            | 2.589063  | 0.768193  | -1.906169 |
| H         | 1.756965  | -3.896900 | -3.007589 | C            | 3.863459  | 1.502436  | -2.058318 |
| H         | 2.317563  | -3.055026 | -1.557294 | C            | 3.904448  | 2.901608  | -2.602499 |
| C         | -0.189248 | -5.400207 | -1.959694 | H            | 4.185062  | 2.897042  | -3.663067 |
| H         | -0.335722 | -5.175156 | -3.021646 | H            | 2.931455  | 3.393890  | -2.503888 |
| H         | 0.415473  | -6.310956 | -1.883388 | H            | 4.646190  | 3.506085  | -2.064519 |
| H         | -1.172191 | -5.595183 | -1.515040 | C            | 5.157608  | 0.723145  | -2.120189 |
|           |           |           |           | H            | 4.948285  | -0.305071 | -1.789262 |
| <b>65</b> |           |           |           | H            | 5.529930  | 0.661067  | -3.152927 |
| C         | -1.885355 | -0.417332 | 0.049303  | C            | 6.217688  | 1.338363  | -1.189700 |
| C         | -0.854592 | 0.637834  | 0.057155  | H            | 6.737601  | 2.157459  | -1.706865 |
| C         | -1.213061 | 2.091055  | 0.205071  | H            | 5.691033  | 1.796427  | -0.341701 |
| H         | -0.500823 | 2.594862  | 0.868850  | C            | 7.218832  | 0.345831  | -0.683984 |
| H         | -1.177819 | 2.595759  | -0.767463 | H            | 8.063154  | 0.120753  | -1.341291 |
| H         | -2.211161 | 2.226491  | 0.629344  | C            | 7.154840  | -0.298440 | 0.489724  |
| C         | 0.463050  | 0.346735  | -0.622061 | C            | 8.222405  | -1.261899 | 0.912488  |
| H         | 0.566854  | -0.740426 | -0.746397 | H            | 9.023111  | -1.343328 | 0.169569  |
| H         | 0.456459  | 0.783058  | -1.632512 | H            | 8.672024  | -0.953793 | 1.867489  |
| C         | 1.672179  | 0.866783  | 0.160410  | H            | 7.809226  | -2.266956 | 1.083274  |
| H         | 1.603017  | 1.961606  | 0.253571  | C            | 6.048063  | -0.106236 | 1.487594  |
| H         | 1.625126  | 0.465962  | 1.181775  | H            | 5.139264  | 0.326953  | 1.052398  |

|    |           |           |           |   |           |           |           |
|----|-----------|-----------|-----------|---|-----------|-----------|-----------|
| H  | 5.771860  | -1.066700 | 1.948023  | C | -3.142521 | 3.988292  | -2.879394 |
| H  | 6.367612  | 0.541070  | 2.317825  | H | -2.637439 | 1.954071  | -2.364984 |
| O  | 3.248300  | 1.375849  | -0.769728 | C | -3.127455 | 5.320121  | -2.470164 |
| C  | 1.226776  | 1.210905  | -2.238366 | H | -2.588102 | 6.695557  | -0.903458 |
| C  | 0.304548  | 0.293683  | -2.932230 | H | -3.561526 | 3.718446  | -3.846502 |
| H  | 2.699730  | -0.324912 | -1.914596 | H | -3.531796 | 6.094093  | -3.118517 |
| H  | 1.083828  | 2.274153  | -2.455104 | C | -0.553834 | 2.843674  | 1.564679  |
| H  | 0.766573  | -0.674603 | -3.168245 | C | 0.674490  | 3.436211  | 1.245986  |
| C  | -5.282316 | 0.052771  | 1.921175  | C | -1.050968 | 2.955673  | 2.863233  |
| C  | -4.057331 | -0.592620 | 2.086577  | C | 1.381743  | 4.146329  | 2.207400  |
| C  | -2.919914 | 0.075236  | 1.634616  | H | 1.079241  | 3.322743  | 0.238298  |
| C  | -2.959299 | 1.318076  | 0.997441  | C | -0.328820 | 3.649894  | 3.832243  |
| C  | -4.204690 | 1.939563  | 0.870459  | H | -2.007309 | 2.503810  | 3.123292  |
| C  | -5.356087 | 1.311941  | 1.332411  | C | 0.882248  | 4.250637  | 3.504958  |
| H  | -6.197196 | -0.428778 | 2.257834  | H | 2.332277  | 4.607870  | 1.948706  |
| H  | -4.273359 | 2.911456  | 0.385482  | H | -0.720954 | 3.727464  | 4.843795  |
| H  | -6.320577 | 1.801836  | 1.224624  | H | 1.440598  | 4.797303  | 4.261493  |
| O  | -1.684445 | -0.506098 | 1.780666  | C | 2.080222  | -2.234288 | -0.276708 |
| C  | -3.879795 | -1.950966 | 2.752347  | C | 3.399537  | -2.175306 | 0.180268  |
| C  | -2.710667 | -2.651450 | 2.072608  | C | 1.798168  | -2.966330 | -1.440028 |
| C  | -1.637783 | -1.873235 | 1.643125  | C | 4.419530  | -2.823242 | -0.511932 |
| C  | -2.599855 | -4.032577 | 1.903904  | H | 3.642688  | -1.600102 | 1.071744  |
| C  | -0.482810 | -2.400084 | 1.061997  | C | 2.817213  | -3.627423 | -2.117260 |
| C  | -1.454479 | -4.595174 | 1.347460  | H | 0.777463  | -2.997093 | -1.822200 |
| H  | -3.410689 | -4.683844 | 2.221364  | C | 4.131984  | -3.551493 | -1.661749 |
| C  | -0.399795 | -3.786569 | 0.934090  | H | 5.444838  | -2.746311 | -0.152300 |
| H  | -1.383526 | -5.674414 | 1.236545  | H | 2.583903  | -4.196432 | -3.014907 |
| H  | 0.489182  | -4.232941 | 0.492660  | H | 4.928657  | -4.056459 | -2.203200 |
| P  | -1.424274 | 1.959166  | 0.217486  | C | 1.551318  | -0.680874 | 2.061369  |
| P  | 0.768501  | -1.190556 | 0.480078  | C | 1.582194  | -1.523862 | 3.177508  |
| C  | -3.515397 | -1.726429 | 4.232161  | C | 2.205284  | 0.552223  | 2.116324  |
| H  | -2.600845 | -1.130915 | 4.333065  | C | 2.257331  | -1.139158 | 4.330413  |
| H  | -4.328778 | -1.197745 | 4.745197  | H | 1.083489  | -2.491949 | 3.141192  |
| H  | -3.354047 | -2.690159 | 4.731469  | C | 2.884456  | 0.932921  | 3.271413  |
| C  | -5.154403 | -2.784107 | 2.676341  | H | 2.211210  | 1.198798  | 1.239027  |
| H  | -5.020041 | -3.748111 | 3.178290  | C | 2.911739  | 0.090124  | 4.378238  |
| H  | -5.980448 | -2.281405 | 3.190402  | H | 2.276185  | -1.801690 | 5.192982  |
| H  | -5.450305 | -2.969923 | 1.636078  | H | 3.398792  | 1.891581  | 3.301775  |
| Cu | -0.131543 | 0.476454  | -0.897175 | H | 3.442928  | 0.389163  | 5.279227  |
| C  | -2.074129 | 3.333984  | -0.808736 | B | -1.314091 | -0.689948 | -2.170702 |
| C  | -2.074705 | 4.669307  | -0.398119 | O | -2.582056 | -0.314710 | -2.581255 |
| C  | -2.617007 | 2.999642  | -2.054999 | O | -1.181437 | -2.065694 | -2.200533 |
| C  | -2.595706 | 5.657965  | -1.229512 | C | -3.403560 | -1.503068 | -2.636683 |
| H  | -1.669123 | 4.940432  | 0.575045  | C | -2.347262 | -2.627868 | -2.838422 |

|              |           |           |           |    |           |           |           |
|--------------|-----------|-----------|-----------|----|-----------|-----------|-----------|
| C            | -4.131460 | -1.604082 | -1.304067 | H  | 7.961073  | -0.276552 | 2.181235  |
| H            | -4.681786 | -0.672789 | -1.121788 | O  | 3.618645  | 1.711949  | 0.278674  |
| H            | -4.845927 | -2.436824 | -1.294809 | C  | 1.445440  | 1.668199  | -1.055493 |
| H            | -3.422818 | -1.743016 | -0.478153 | C  | 0.960850  | 1.205528  | -2.372618 |
| C            | -4.401979 | -1.352908 | -3.765561 | H  | 2.894944  | 0.071317  | -0.841161 |
| H            | -4.979517 | -2.276787 | -3.897675 | H  | 1.317415  | 2.744005  | -0.878852 |
| H            | -5.105882 | -0.546971 | -3.529272 | H  | 1.628956  | 0.473109  | -2.841294 |
| H            | -3.911439 | -1.107576 | -4.712625 | C  | -1.388757 | -3.308659 | 3.632183  |
| C            | -2.676722 | -3.946939 | -2.169584 | C  | -2.120817 | -2.363455 | 2.915950  |
| H            | -3.594148 | -4.378548 | -2.590490 | C  | -1.667661 | -2.042945 | 1.635176  |
| H            | -1.858354 | -4.657075 | -2.343221 | C  | -0.491728 | -2.560718 | 1.084715  |
| H            | -2.798992 | -3.839587 | -1.086678 | C  | 0.191484  | -3.530274 | 1.824612  |
| C            | -1.982087 | -2.866044 | -4.296778 | C  | -0.257103 | -3.906530 | 3.084523  |
| H            | -1.106242 | -3.524073 | -4.337497 | H  | -1.707248 | -3.597457 | 4.630871  |
| H            | -2.798740 | -3.348104 | -4.847197 | H  | 1.099353  | -3.971550 | 1.418643  |
| H            | -1.723171 | -1.930764 | -4.807731 | H  | 0.284518  | -4.660143 | 3.650496  |
| C            | -0.398742 | 0.910626  | -4.133073 | O  | -2.388378 | -1.174969 | 0.856491  |
| H            | -1.165018 | 0.270031  | -4.583967 | C  | -3.401389 | -1.712288 | 3.424777  |
| H            | -0.883739 | 1.853379  | -3.851508 | C  | -3.508488 | -0.327473 | 2.800813  |
| H            | 0.351687  | 1.141251  | -4.901065 | C  | -3.022152 | -0.145304 | 1.509294  |
|              |           |           |           | C  | -4.120883 | 0.771165  | 3.406866  |
| <b>67-ts</b> |           |           |           | C  | -3.131842 | 1.055849  | 0.804291  |
| C            | 2.822557  | 1.160678  | -0.768214 | C  | -4.253315 | 1.981891  | 2.732697  |
| C            | 4.052052  | 1.900449  | -1.078500 | H  | -4.513327 | 0.681859  | 4.416946  |
| C            | 4.016000  | 3.318069  | -1.574845 | C  | -3.769484 | 2.123204  | 1.434922  |
| H            | 4.057881  | 3.338522  | -2.671110 | H  | -4.743575 | 2.819873  | 3.222026  |
| H            | 3.105937  | 3.834659  | -1.254462 | H  | -3.874054 | 3.072700  | 0.913055  |
| H            | 4.875479  | 3.885005  | -1.196440 | P  | 0.146486  | -1.838018 | -0.483345 |
| C            | 5.288963  | 1.104316  | -1.415518 | P  | -2.350476 | 1.096119  | -0.853959 |
| H            | 5.123155  | 0.059955  | -1.111629 | C  | -4.601906 | -2.551872 | 2.948572  |
| H            | 5.441210  | 1.096360  | -2.505401 | H  | -4.630565 | -2.629499 | 1.855569  |
| C            | 6.546271  | 1.624414  | -0.710894 | H  | -4.540418 | -3.566280 | 3.362843  |
| H            | 6.829902  | 2.601408  | -1.127468 | H  | -5.540833 | -2.093336 | 3.284236  |
| H            | 6.298454  | 1.800286  | 0.345027  | C  | -3.422513 | -1.639828 | 4.948860  |
| C            | 7.690864  | 0.668211  | -0.842676 | H  | -4.358320 | -1.196050 | 5.304550  |
| H            | 8.271700  | 0.738327  | -1.766442 | H  | -3.369968 | -2.640522 | 5.389815  |
| C            | 8.027834  | -0.291596 | 0.028667  | H  | -2.585065 | -1.044602 | 5.334033  |
| C            | 9.176772  | -1.217003 | -0.234850 | Cu | -0.187829 | 0.409420  | -0.903238 |
| H            | 9.683520  | -0.986906 | -1.178035 | C  | 1.927178  | -2.314842 | -0.435745 |
| H            | 9.919314  | -1.166024 | 0.574249  | C  | 2.567850  | -2.914967 | -1.522864 |
| H            | 8.839263  | -2.263142 | -0.273738 | C  | 2.700805  | -1.910657 | 0.663473  |
| C            | 7.318653  | -0.535602 | 1.327651  | C  | 3.949974  | -3.095831 | -1.520857 |
| H            | 6.380604  | 0.022160  | 1.423618  | H  | 1.990887  | -3.241950 | -2.385672 |
| H            | 7.086956  | -1.605279 | 1.437835  | C  | 4.075824  | -2.107256 | 0.668526  |

|   |           |           |           |           |           |           |           |
|---|-----------|-----------|-----------|-----------|-----------|-----------|-----------|
| H | 2.230777  | -1.389441 | 1.496580  | H         | 0.302819  | -0.554165 | 3.772909  |
| C | 4.708489  | -2.691972 | -0.427206 | H         | -0.167979 | 0.856749  | 4.748118  |
| H | 4.431358  | -3.558967 | -2.379309 | H         | -0.956183 | 0.547326  | 3.179872  |
| H | 4.660737  | -1.783041 | 1.527575  | C         | 2.379040  | 1.221585  | 3.795181  |
| H | 5.789856  | -2.823852 | -0.431568 | H         | 2.304610  | 1.776011  | 4.739720  |
| C | -0.564444 | -2.922892 | -1.783355 | H         | 2.598106  | 0.174001  | 4.036204  |
| C | -0.352071 | -2.556127 | -3.118903 | H         | 3.217134  | 1.615335  | 3.212369  |
| C | -1.332828 | -4.054110 | -1.504419 | C         | -0.408972 | 3.351638  | 3.536452  |
| C | -0.868450 | -3.325948 | -4.154088 | H         | -0.024492 | 3.439475  | 4.560834  |
| H | 0.211404  | -1.646145 | -3.336751 | H         | -0.657132 | 4.359343  | 3.182645  |
| C | -1.875298 | -4.808793 | -2.542816 | H         | -1.333729 | 2.764456  | 3.555002  |
| H | -1.510317 | -4.348198 | -0.471108 | C         | 1.793507  | 3.697301  | 2.420263  |
| C | -1.637014 | -4.452912 | -3.866183 | H         | 1.410038  | 4.620193  | 1.968879  |
| H | -0.686042 | -3.037673 | -5.187154 | H         | 2.271162  | 3.957797  | 3.372592  |
| H | -2.480835 | -5.682702 | -2.313443 | H         | 2.547045  | 3.269782  | 1.747063  |
| H | -2.056022 | -5.047849 | -4.674489 | C         | 0.377351  | 2.220656  | -3.324386 |
| C | -2.653428 | 2.807730  | -1.440725 | H         | 1.143563  | 2.805281  | -3.866292 |
| C | -3.461780 | 3.077843  | -2.548096 | H         | -0.262311 | 1.752969  | -4.088063 |
| C | -1.949424 | 3.859759  | -0.836628 | H         | -0.253507 | 2.946767  | -2.792055 |
| C | -3.567676 | 4.375339  | -3.043595 |           |           |           |           |
| H | -4.007819 | 2.272249  | -3.035683 | <b>68</b> |           |           |           |
| C | -2.073408 | 5.155740  | -1.324842 | C         | 2.541654  | 1.903793  | -0.054336 |
| H | -1.291661 | 3.653928  | 0.008812  | C         | 3.779945  | 2.258714  | 0.677864  |
| C | -2.877830 | 5.416465  | -2.432400 | C         | 3.797060  | 3.313460  | 1.745699  |
| H | -4.195876 | 4.570996  | -3.909724 | H         | 4.274962  | 4.228621  | 1.372553  |
| H | -1.529006 | 5.965922  | -0.844269 | H         | 2.780988  | 3.562705  | 2.069617  |
| H | -2.963239 | 6.429293  | -2.819460 | H         | 4.362657  | 2.976531  | 2.624376  |
| C | -3.540705 | 0.105825  | -1.838738 | C         | 5.106794  | 1.921027  | 0.041273  |
| C | -4.902770 | 0.039849  | -1.527545 | H         | 4.919515  | 1.197399  | -0.766402 |
| C | -3.061271 | -0.580205 | -2.955317 | H         | 5.546433  | 2.814512  | -0.426247 |
| C | -5.767000 | -0.706874 | -2.320976 | C         | 6.095569  | 1.292756  | 1.035244  |
| H | -5.288725 | 0.577858  | -0.661950 | H         | 6.559095  | 2.077114  | 1.649337  |
| C | -3.925596 | -1.329885 | -3.748216 | H         | 5.523390  | 0.659679  | 1.727843  |
| H | -1.997584 | -0.534243 | -3.189697 | C         | 7.155504  | 0.478988  | 0.355806  |
| C | -5.278767 | -1.394220 | -3.430662 | H         | 8.079745  | 0.994978  | 0.083766  |
| H | -6.824831 | -0.753816 | -2.072216 | C         | 7.037462  | -0.812560 | 0.019322  |
| H | -3.535695 | -1.871960 | -4.607654 | C         | 8.140677  | -1.549124 | -0.676622 |
| H | -5.955171 | -1.983412 | -4.045754 | H         | 9.018300  | -0.915507 | -0.843623 |
| B | 0.573639  | 1.370919  | 0.783652  | H         | 8.457359  | -2.426676 | -0.094624 |
| O | 1.292197  | 0.675565  | 1.730721  | H         | 7.805685  | -1.935143 | -1.650502 |
| O | 0.033452  | 2.525287  | 1.323339  | C         | 5.817882  | -1.635202 | 0.315515  |
| C | 1.082235  | 1.297253  | 3.015010  | H         | 4.950211  | -1.032637 | 0.609729  |
| C | 0.630696  | 2.735689  | 2.622462  | H         | 5.528312  | -2.227896 | -0.565169 |
| C | -0.003292 | 0.499316  | 3.723820  | H         | 6.017232  | -2.363594 | 1.115500  |

|    |           |           |           |   |           |           |           |
|----|-----------|-----------|-----------|---|-----------|-----------|-----------|
| O  | 3.038734  | 1.073160  | 1.012189  | C | -2.338812 | 3.871093  | 4.595064  |
| C  | 1.159543  | 2.449706  | 0.082159  | H | -2.682074 | 2.461302  | 6.189034  |
| C  | 0.849445  | 3.482997  | -1.037287 | H | -1.926071 | 5.035866  | 2.829289  |
| H  | 2.733252  | 1.463983  | -1.045892 | H | -2.546818 | 4.739708  | 5.215669  |
| H  | 1.044707  | 2.946410  | 1.060809  | C | -0.560906 | -0.934903 | 3.026853  |
| H  | 1.549820  | 3.293521  | -1.870842 | C | 0.691698  | -0.526041 | 3.503107  |
| C  | -5.536064 | -1.428202 | 0.612216  | C | -1.055286 | -2.189519 | 3.386129  |
| C  | -4.369514 | -1.904801 | 0.014511  | C | 1.426851  | -1.352990 | 4.342116  |
| C  | -3.159120 | -1.444432 | 0.529729  | H | 1.092923  | 0.444654  | 3.204684  |
| C  | -3.063271 | -0.515901 | 1.570906  | C | -0.306897 | -3.023408 | 4.214619  |
| C  | -4.256231 | -0.072105 | 2.146850  | H | -2.030876 | -2.515820 | 3.027184  |
| C  | -5.481019 | -0.530945 | 1.674866  | C | 0.929375  | -2.605622 | 4.696811  |
| H  | -6.505055 | -1.760360 | 0.247594  | H | 2.396455  | -1.024585 | 4.710251  |
| H  | -4.226246 | 0.658729  | 2.952057  | H | -0.697981 | -4.000298 | 4.490157  |
| H  | -6.402605 | -0.176721 | 2.129729  | H | 1.508879  | -3.257203 | 5.346971  |
| O  | -1.976011 | -1.882102 | -0.012239 | C | 1.897538  | -0.762379 | -2.291170 |
| C  | -4.327470 | -2.923265 | -1.117325 | C | 3.175190  | -1.319256 | -2.203286 |
| C  | -3.120795 | -2.600554 | -1.989415 | C | 1.653935  | 0.238748  | -3.241540 |
| C  | -1.972107 | -2.119184 | -1.365300 | C | 4.195760  | -0.877086 | -3.042782 |
| C  | -3.046647 | -2.828118 | -3.363848 | H | 3.383952  | -2.092590 | -1.465983 |
| C  | -0.773293 | -1.864122 | -2.038871 | C | 2.668822  | 0.661139  | -4.092176 |
| C  | -1.864741 | -2.603789 | -4.065013 | H | 0.673466  | 0.714995  | -3.290026 |
| H  | -3.917656 | -3.199428 | -3.898361 | C | 3.945741  | 0.111262  | -3.988861 |
| C  | -0.732514 | -2.132399 | -3.408129 | H | 5.191740  | -1.308681 | -2.951742 |
| H  | -1.826258 | -2.802477 | -5.133054 | H | 2.467628  | 1.438536  | -4.826159 |
| H  | 0.185652  | -1.951761 | -3.963361 | H | 4.743826  | 0.456505  | -4.641997 |
| P  | -1.417975 | 0.226149  | 1.905611  | C | 1.252727  | -2.518907 | -0.104180 |
| P  | 0.581841  | -1.111382 | -1.062320 | C | 0.917925  | -3.849894 | -0.365957 |
| C  | -4.113063 | -4.320461 | -0.503558 | C | 2.165009  | -2.226538 | 0.916444  |
| H  | -3.187358 | -4.362422 | 0.082944  | C | 1.492000  | -4.875477 | 0.379836  |
| H  | -4.950580 | -4.575169 | 0.158056  | H | 0.206687  | -4.087214 | -1.156237 |
| H  | -4.051107 | -5.076054 | -1.296820 | C | 2.750953  | -3.256342 | 1.645591  |
| C  | -5.621269 | -2.927765 | -1.923390 | H | 2.427504  | -1.188056 | 1.131188  |
| H  | -5.585808 | -3.689478 | -2.709358 | C | 2.412817  | -4.580976 | 1.381407  |
| H  | -6.476398 | -3.180685 | -1.287811 | H | 1.223900  | -5.909009 | 0.171769  |
| H  | -5.809537 | -1.952994 | -2.390000 | H | 3.463316  | -3.018092 | 2.433536  |
| Cu | 0.028847  | 0.788886  | 0.188147  | H | 2.865335  | -5.384660 | 1.957968  |
| C  | -1.799213 | 1.639598  | 3.006200  | B | -0.575502 | 3.167584  | -1.588980 |
| C  | -2.144458 | 1.479939  | 4.352827  | O | -1.760785 | 3.675378  | -1.097665 |
| C  | -1.719019 | 2.926440  | 2.464311  | O | -0.791645 | 2.326864  | -2.665232 |
| C  | -2.414675 | 2.591587  | 5.142906  | C | -2.842246 | 2.967127  | -1.744627 |
| H  | -2.200582 | 0.479189  | 4.781678  | C | -2.172175 | 2.449218  | -3.053928 |
| C  | -1.993115 | 4.037960  | 3.257335  | C | -3.265779 | 1.838879  | -0.819793 |
| H  | -1.430498 | 3.050961  | 1.418632  | H | -3.535250 | 2.254826  | 0.159040  |

|           |           |           |           |    |           |           |           |
|-----------|-----------|-----------|-----------|----|-----------|-----------|-----------|
| H         | -4.134927 | 1.294554  | -1.210143 | C  | -2.081708 | 2.772889  | 0.339398  |
| H         | -2.447519 | 1.121151  | -0.667263 | C  | -1.080102 | 2.162940  | 1.365897  |
| C         | -3.998891 | 3.922767  | -1.952165 | H  | -3.051748 | 0.914190  | -0.266615 |
| H         | -4.804332 | 3.436775  | -2.517246 | H  | -2.423858 | 3.769955  | 0.675697  |
| H         | -4.404953 | 4.225077  | -0.980269 | H  | -1.688298 | 1.615093  | 2.111762  |
| H         | -3.693081 | 4.826676  | -2.486873 | C  | 1.600026  | -3.974070 | -3.274084 |
| C         | -2.665225 | 1.101314  | -3.541193 | C  | 2.344817  | -3.139063 | -2.444016 |
| H         | -3.736972 | 1.137531  | -3.776124 | C  | 1.658127  | -2.478376 | -1.426422 |
| H         | -2.128018 | 0.824589  | -4.456709 | C  | 0.280736  | -2.577075 | -1.224763 |
| H         | -2.493306 | 0.307286  | -2.805220 | C  | -0.425446 | -3.441328 | -2.068371 |
| C         | -2.221560 | 3.461408  | -4.190274 | C  | 0.231135  | -4.135303 | -3.078477 |
| H         | -1.563761 | 3.118674  | -4.996540 | H  | 2.090996  | -4.511196 | -4.082225 |
| H         | -3.234250 | 3.567337  | -4.596137 | H  | -1.500238 | -3.557793 | -1.947750 |
| H         | -1.871255 | 4.447148  | -3.862420 | H  | -0.331952 | -4.801371 | -3.727285 |
| C         | 1.036530  | 4.920219  | -0.554971 | O  | 2.342599  | -1.667285 | -0.557427 |
| H         | 0.877895  | 5.663890  | -1.348442 | C  | 3.851275  | -2.941804 | -2.527722 |
| H         | 0.321572  | 5.144919  | 0.250362  | C  | 4.143220  | -1.502914 | -2.127456 |
| H         | 2.045467  | 5.070695  | -0.145267 | C  | 3.390419  | -0.958121 | -1.089595 |
|           |           |           |           | C  | 5.160000  | -0.709469 | -2.656875 |
| <b>69</b> |           |           |           | C  | 3.632701  | 0.295800  | -0.528566 |
| C         | -3.269219 | 1.865101  | 0.227849  | C  | 5.414833  | 0.559674  | -2.143670 |
| C         | -4.383983 | 1.827168  | 1.174486  | H  | 5.768565  | -1.084125 | -3.475853 |
| C         | -4.490385 | 2.793558  | 2.321851  | C  | 4.668833  | 1.055423  | -1.078758 |
| H         | -4.218144 | 2.297057  | 3.262156  | H  | 6.212569  | 1.162856  | -2.569652 |
| H         | -3.833740 | 3.658042  | 2.186361  | H  | 4.886117  | 2.043999  | -0.678278 |
| H         | -5.518423 | 3.162758  | 2.425044  | P  | -0.510289 | -1.442650 | -0.001806 |
| C         | -5.129314 | 0.523872  | 1.334325  | P  | 2.493214  | 0.863127  | 0.795094  |
| H         | -4.966650 | -0.078253 | 0.428373  | C  | 4.520250  | -3.868540 | -1.492789 |
| H         | -4.704061 | -0.049941 | 2.173894  | H  | 4.162148  | -3.663895 | -0.476088 |
| C         | -6.634771 | 0.725276  | 1.532037  | H  | 4.300624  | -4.917484 | -1.728625 |
| H         | -6.824744 | 1.151676  | 2.527202  | H  | 5.608141  | -3.726521 | -1.507449 |
| H         | -6.971987 | 1.481517  | 0.808251  | C  | 4.395128  | -3.276709 | -3.911392 |
| C         | -7.409908 | -0.545941 | 1.367206  | H  | 5.482517  | -3.148099 | -3.941967 |
| H         | -7.542897 | -1.157448 | 2.263480  | H  | 4.198796  | -4.325115 | -4.160900 |
| C         | -7.906353 | -1.013507 | 0.214376  | H  | 3.947774  | -2.645298 | -4.688292 |
| C         | -8.647644 | -2.313863 | 0.151805  | Cu | 0.142101  | 0.785020  | 0.567365  |
| H         | -8.758203 | -2.772287 | 1.140447  | C  | -2.271628 | -1.779236 | -0.397441 |
| H         | -9.650987 | -2.178503 | -0.277008 | C  | -3.051238 | -2.724470 | 0.273290  |
| H         | -8.132588 | -3.033540 | -0.502063 | C  | -2.806507 | -1.114804 | -1.508515 |
| C         | -7.780492 | -0.294262 | -1.096418 | C  | -4.343273 | -3.006929 | -0.164073 |
| H         | -7.047269 | 0.519247  | -1.075623 | H  | -2.645255 | -3.252790 | 1.133864  |
| H         | -7.478899 | -0.991641 | -1.890659 | C  | -4.091751 | -1.407144 | -1.951761 |
| H         | -8.747901 | 0.122975  | -1.410965 | H  | -2.216093 | -0.350195 | -2.017410 |
| O         | -4.546091 | 2.406169  | -0.131531 | C  | -4.857565 | -2.359649 | -1.282874 |



|   |           |           |           |              |           |           |           |
|---|-----------|-----------|-----------|--------------|-----------|-----------|-----------|
| H | -4.946284 | -3.742212 | 0.364855  | H            | 1.025406  | 1.178792  | -1.715108 |
| H | -4.500781 | -0.885557 | -2.814459 | C            | -0.972839 | 2.005256  | -4.410062 |
| H | -5.859963 | -2.595973 | -1.634136 | H            | -0.202698 | 2.221251  | -5.161293 |
| C | -0.271333 | -2.261887 | 1.618948  | H            | -1.294571 | 0.966027  | -4.546728 |
| C | -0.952933 | -1.716935 | 2.715900  | H            | -1.834814 | 2.652036  | -4.595151 |
| C | 0.585776  | -3.345461 | 1.818122  | C            | 1.552370  | 3.855410  | -2.856194 |
| C | -0.799080 | -2.266624 | 3.982561  | H            | 1.827259  | 3.754614  | -3.913766 |
| H | -1.619456 | -0.864795 | 2.567676  | H            | 1.808670  | 4.872199  | -2.535009 |
| C | 0.751018  | -3.883437 | 3.091890  | H            | 2.160428  | 3.155480  | -2.273550 |
| H | 1.122658  | -3.778541 | 0.975058  | C            | -0.714104 | 4.707152  | -3.409268 |
| C | 0.056813  | -3.349442 | 4.172902  | H            | -0.456185 | 5.681130  | -2.979432 |
| H | -1.341528 | -1.843564 | 4.825226  | H            | -0.470427 | 4.727265  | -4.477526 |
| H | 1.423944  | -4.725482 | 3.237595  | H            | -1.795460 | 4.564916  | -3.300226 |
| H | 0.184818  | -3.774813 | 5.165859  | C            | -0.361127 | 3.285695  | 2.101515  |
| C | 3.222807  | 2.497859  | 1.178927  | H            | -1.067043 | 3.948997  | 2.639359  |
| C | 4.357564  | 2.657211  | 1.979917  | H            | 0.362999  | 2.913293  | 2.841495  |
| C | 2.661360  | 3.613697  | 0.553464  | H            | 0.199726  | 3.929517  | 1.409990  |
| C | 4.924139  | 3.917152  | 2.145555  |              |           |           |           |
| H | 4.806546  | 1.791708  | 2.466793  | <b>70-ts</b> |           |           |           |
| C | 3.235466  | 4.871482  | 0.711216  | C            | 5.080834  | 1.556323  | -1.449981 |
| H | 1.758747  | 3.496797  | -0.047142 | C            | 4.076213  | 0.681978  | -1.869153 |
| C | 4.366904  | 5.023676  | 1.507711  | C            | 2.785078  | 0.946298  | -1.417882 |
| H | 5.806084  | 4.035386  | 2.770858  | C            | 2.467295  | 1.994609  | -0.549531 |
| H | 2.789987  | 5.733577  | 0.218702  | C            | 3.499672  | 2.848466  | -0.159596 |
| H | 4.814186  | 6.006721  | 1.636788  | C            | 4.796855  | 2.632685  | -0.614807 |
| C | 2.960190  | -0.151156 | 2.248415  | H            | 6.104358  | 1.405407  | -1.784482 |
| C | 4.085126  | -0.978059 | 2.293320  | H            | 3.288245  | 3.675041  | 0.516785  |
| C | 2.128938  | -0.063321 | 3.370666  | H            | 5.595979  | 3.303722  | -0.310197 |
| C | 4.377667  | -1.700202 | 3.447264  | O            | 1.737911  | 0.154493  | -1.810062 |
| H | 4.738942  | -1.053981 | 1.424777  | C            | 4.294921  | -0.476584 | -2.835696 |
| C | 2.431562  | -0.773853 | 4.526434  | C            | 3.256216  | -1.551856 | -2.541080 |
| H | 1.236505  | 0.564008  | 3.333616  | C            | 2.010786  | -1.168740 | -2.047201 |
| C | 3.555128  | -1.595487 | 4.565110  | C            | 3.447714  | -2.911811 | -2.786287 |
| H | 5.255385  | -2.342128 | 3.473474  | C            | 0.976610  | -2.067931 | -1.772538 |
| H | 1.781906  | -0.694596 | 5.395090  | C            | 2.432311  | -3.834240 | -2.552663 |
| H | 3.787716  | -2.158158 | 5.466403  | H            | 4.400985  | -3.261630 | -3.175285 |
| B | -1.285954 | 2.857619  | -1.005770 | C            | 1.204469  | -3.416748 | -2.050690 |
| O | -1.491665 | 1.992168  | -2.063380 | H            | 2.600684  | -4.887115 | -2.764557 |
| O | -0.273025 | 3.756634  | -1.274359 | H            | 0.419409  | -4.144826 | -1.858105 |
| C | -0.420890 | 2.182120  | -3.009579 | P            | 0.746058  | 2.072754  | 0.086118  |
| C | 0.065382  | 3.626481  | -2.672907 | P            | -0.548593 | -1.406047 | -0.992034 |
| C | 0.630312  | 1.112782  | -2.739803 | C            | 4.068582  | 0.036921  | -4.269597 |
| H | 0.175708  | 0.120036  | -2.855958 | H            | 3.056066  | 0.439641  | -4.394714 |
| H | 1.473548  | 1.185294  | -3.438439 | H            | 4.785731  | 0.833523  | -4.504828 |

|    |           |           |           |   |           |           |           |
|----|-----------|-----------|-----------|---|-----------|-----------|-----------|
| H  | 4.203086  | -0.779311 | -4.990562 | C | -3.528130 | 0.316089  | -3.207291 |
| C  | 5.711048  | -1.034062 | -2.717983 | H | -3.161378 | -0.225979 | -1.153850 |
| H  | 5.876819  | -1.838929 | -3.441487 | C | -2.995883 | 0.406878  | -4.490929 |
| H  | 6.456597  | -0.263647 | -2.939469 | H | -1.273347 | 0.033447  | -5.728739 |
| H  | 5.900911  | -1.425955 | -1.710528 | H | -4.533246 | 0.682772  | -3.001700 |
| Cu | -0.262606 | 0.103176  | 0.789809  | H | -3.583859 | 0.834928  | -5.299794 |
| C  | 0.881702  | 3.366166  | 1.378197  | B | 1.152509  | -1.671320 | 3.054629  |
| C  | 0.688616  | 4.728325  | 1.137060  | O | 2.123476  | -0.973681 | 3.738181  |
| C  | 1.192581  | 2.936743  | 2.674007  | O | 1.688569  | -2.464655 | 2.060076  |
| C  | 0.812335  | 5.647356  | 2.176004  | C | 3.364145  | -1.147199 | 3.017910  |
| H  | 0.440761  | 5.072041  | 0.133530  | C | 3.119882  | -2.477850 | 2.245080  |
| C  | 1.326389  | 3.856798  | 3.707634  | C | 3.511431  | 0.042824  | 2.086948  |
| H  | 1.310616  | 1.869541  | 2.866714  | H | 3.491959  | 0.969780  | 2.672804  |
| C  | 1.133541  | 5.213757  | 3.459306  | H | 4.454951  | 0.006329  | 1.529095  |
| H  | 0.657261  | 6.706203  | 1.981516  | H | 2.681884  | 0.077088  | 1.367337  |
| H  | 1.569878  | 3.513739  | 4.710510  | C | 4.509246  | -1.184115 | 4.008201  |
| H  | 1.229091  | 5.934465  | 4.268118  | H | 5.453780  | -1.410173 | 3.497537  |
| C  | -0.169250 | 2.890376  | -1.270228 | H | 4.612814  | -0.204416 | 4.488169  |
| C  | -1.557382 | 2.716051  | -1.295649 | H | 4.348960  | -1.929552 | 4.792482  |
| C  | 0.447743  | 3.673787  | -2.251213 | C | 3.790310  | -2.565898 | 0.889908  |
| C  | -2.316672 | 3.335259  | -2.283227 | H | 4.882972  | -2.528829 | 0.991268  |
| H  | -2.035805 | 2.070280  | -0.554645 | H | 3.523978  | -3.513629 | 0.406240  |
| C  | -0.316443 | 4.280403  | -3.243041 | H | 3.472895  | -1.755885 | 0.224763  |
| H  | 1.528673  | 3.811323  | -2.236843 | C | 3.446436  | -3.714665 | 3.070029  |
| C  | -1.699556 | 4.115034  | -3.257113 | H | 3.068570  | -4.600220 | 2.547443  |
| H  | -3.394759 | 3.185530  | -2.302773 | H | 4.527196  | -3.833386 | 3.208427  |
| H  | 0.168886  | 4.885139  | -4.005895 | H | 2.970819  | -3.673628 | 4.057092  |
| H  | -2.294891 | 4.590722  | -4.033354 | C | -2.275560 | -0.262599 | 2.377315  |
| C  | -1.469422 | -2.941028 | -0.572806 | C | -3.125908 | 0.883724  | 2.046724  |
| C  | -2.683076 | -3.310904 | -1.156115 | C | -2.645202 | 2.276454  | 2.383323  |
| C  | -0.934825 | -3.741339 | 0.447485  | H | -2.875456 | 2.530941  | 3.426023  |
| C  | -3.350899 | -4.457149 | -0.729005 | H | -1.564665 | 2.367515  | 2.231949  |
| H  | -3.118580 | -2.704045 | -1.947644 | H | -3.140328 | 3.014557  | 1.738707  |
| C  | -1.597595 | -4.890870 | 0.861151  | C | -4.633770 | 0.718959  | 2.175625  |
| H  | 0.010514  | -3.461210 | 0.916445  | H | -4.870875 | -0.352881 | 2.122611  |
| C  | -2.811185 | -5.249928 | 0.277574  | H | -4.987539 | 1.075463  | 3.154142  |
| H  | -4.297137 | -4.729438 | -1.191829 | C | -5.368628 | 1.439403  | 1.036221  |
| H  | -1.167896 | -5.504916 | 1.649834  | H | -5.417216 | 2.516294  | 1.245530  |
| H  | -3.334038 | -6.144356 | 0.608492  | H | -4.751748 | 1.331652  | 0.129188  |
| C  | -1.480282 | -0.709191 | -2.414178 | C | -6.752031 | 0.911842  | 0.787302  |
| C  | -0.951625 | -0.610657 | -3.703860 | H | -7.586265 | 1.506864  | 1.166699  |
| C  | -2.769321 | -0.214571 | -2.170753 | C | -7.045073 | -0.235039 | 0.159165  |
| C  | -1.700925 | -0.041825 | -4.731297 | C | -8.461681 | -0.681119 | -0.038731 |
| H  | 0.049436  | -0.984075 | -3.915282 | H | -9.180748 | 0.037632  | 0.368928  |

|           |           |           |           |    |           |           |           |
|-----------|-----------|-----------|-----------|----|-----------|-----------|-----------|
| H         | -8.685380 | -0.820644 | -1.106248 | C  | 5.655001  | 0.097061  | -3.123527 |
| H         | -8.641501 | -1.654648 | 0.439483  | H  | 5.798090  | -0.457522 | -4.056703 |
| C         | -6.010888 | -1.170367 | -0.395191 | H  | 6.338894  | 0.951003  | -3.167117 |
| H         | -4.982395 | -0.878454 | -0.155312 | H  | 5.951882  | -0.546130 | -2.285452 |
| H         | -6.167393 | -2.185598 | -0.002404 | Cu | -0.622960 | 0.250189  | 0.411555  |
| H         | -6.098643 | -1.251496 | -1.489169 | C  | 0.961035  | 2.573558  | 2.422782  |
| O         | -2.669140 | 0.376187  | 0.811905  | C  | 0.746034  | 3.872121  | 2.889153  |
| C         | -0.888572 | -0.273634 | 2.741278  | C  | 1.310754  | 1.566291  | 3.330802  |
| C         | -0.373570 | -1.574215 | 3.372223  | C  | 0.878594  | 4.157338  | 4.246418  |
| H         | -2.802237 | -1.222330 | 2.375016  | H  | 0.467006  | 4.660966  | 2.191405  |
| H         | -0.570954 | 0.613927  | 3.308731  | C  | 1.451122  | 1.855484  | 4.682536  |
| H         | -0.871415 | -2.413480 | 2.857622  | H  | 1.451168  | 0.541847  | 2.982346  |
| C         | -0.686698 | -1.653775 | 4.868364  | C  | 1.229938  | 3.152106  | 5.142873  |
| H         | -0.339166 | -2.590494 | 5.326700  | H  | 0.703958  | 5.169326  | 4.604483  |
| H         | -0.200794 | -0.826688 | 5.404199  | H  | 1.717626  | 1.060954  | 5.376988  |
| H         | -1.768024 | -1.570080 | 5.047564  | H  | 1.324946  | 3.378048  | 6.202391  |
|           |           |           |           | C  | -0.196101 | 3.458186  | -0.081043 |
| <b>71</b> |           |           |           | C  | -1.595347 | 3.426199  | -0.005415 |
| C         | 5.004615  | 2.064698  | -1.043627 | C  | 0.441960  | 4.536572  | -0.700873 |
| C         | 3.996897  | 1.369796  | -1.710982 | C  | -2.338859 | 4.472071  | -0.544141 |
| C         | 2.704592  | 1.458948  | -1.190736 | H  | -2.093041 | 2.560920  | 0.449086  |
| C         | 2.397734  | 2.179668  | -0.032390 | C  | -0.310408 | 5.575374  | -1.241481 |
| C         | 3.433457  | 2.879132  | 0.592829  | H  | 1.529274  | 4.566607  | -0.759780 |
| C         | 4.727109  | 2.823995  | 0.089469  | C  | -1.700156 | 5.544378  | -1.162009 |
| H         | 6.026370  | 2.023107  | -1.412221 | H  | -3.425492 | 4.441753  | -0.490230 |
| H         | 3.221387  | 3.449888  | 1.495748  | H  | 0.190572  | 6.410368  | -1.726116 |
| H         | 5.527308  | 3.366594  | 0.586191  | H  | -2.285973 | 6.356029  | -1.587763 |
| O         | 1.673446  | 0.796148  | -1.812815 | C  | -1.469501 | -2.588046 | -1.400346 |
| C         | 4.210122  | 0.564771  | -2.986747 | C  | -2.731331 | -2.767900 | -1.968508 |
| C         | 3.239191  | -0.608363 | -2.964700 | C  | -0.935565 | -3.589403 | -0.578469 |
| C         | 1.984073  | -0.413549 | -2.389685 | C  | -3.446306 | -3.939075 | -1.725456 |
| C         | 3.487859  | -1.852087 | -3.546615 | H  | -3.162242 | -1.987716 | -2.595080 |
| C         | 0.991177  | -1.399121 | -2.365110 | C  | -1.646388 | -4.760920 | -0.349086 |
| C         | 2.514548  | -2.846977 | -3.561477 | H  | 0.038553  | -3.447261 | -0.106257 |
| H         | 4.452005  | -2.049725 | -4.008420 | C  | -2.906570 | -4.935760 | -0.919549 |
| C         | 1.272388  | -2.622111 | -2.978211 | H  | -4.430413 | -4.071046 | -2.170273 |
| H         | 2.727030  | -3.803744 | -4.031744 | H  | -1.220201 | -5.532348 | 0.289049  |
| H         | 0.516459  | -3.405334 | -2.980808 | H  | -3.468979 | -5.847085 | -0.729809 |
| P         | 0.712319  | 2.064784  | 0.682386  | C  | -1.493265 | -0.031039 | -2.751731 |
| P         | -0.571153 | -1.001846 | -1.498624 | C  | -1.228595 | -0.145915 | -4.120126 |
| C         | 3.859052  | 1.460599  | -4.190038 | C  | -2.516319 | 0.819646  | -2.313198 |
| H         | 2.825002  | 1.819259  | -4.134763 | C  | -1.971796 | 0.584218  | -5.041671 |
| H         | 4.523803  | 2.333221  | -4.217699 | H  | -0.439827 | -0.812077 | -4.467674 |
| H         | 3.978280  | 0.900076  | -5.125754 | C  | -3.258783 | 1.543653  | -3.242720 |

|   |           |           |           |              |           |           |           |
|---|-----------|-----------|-----------|--------------|-----------|-----------|-----------|
| H | -2.738875 | 0.892336  | -1.245187 | H            | -8.220224 | -1.833180 | -0.661089 |
| C | -2.987026 | 1.431149  | -4.603268 | C            | -5.821820 | -0.438196 | -1.093403 |
| H | -1.758793 | 0.490752  | -6.104215 | H            | -4.808832 | -0.192681 | -0.752513 |
| H | -4.053509 | 2.202471  | -2.897005 | H            | -5.810876 | -1.474698 | -1.461444 |
| H | -3.567304 | 2.002558  | -5.324346 | H            | -6.055784 | 0.188917  | -1.966892 |
| B | 1.208389  | -2.635964 | 2.639571  | O            | -2.546791 | 0.472390  | 0.796181  |
| O | 2.227521  | -1.816885 | 3.056814  | C            | -0.971134 | -1.385870 | 3.129304  |
| O | 1.583013  | -3.474741 | 1.622084  | C            | -0.217019 | -2.676429 | 3.296853  |
| C | 3.316709  | -1.974960 | 2.113451  | H            | -2.350952 | -2.084282 | 1.720479  |
| C | 3.017372  | -3.368149 | 1.476849  | H            | -0.621604 | -0.549591 | 3.745756  |
| C | 3.209165  | -0.836477 | 1.115406  | H            | -0.782534 | -3.476421 | 2.792998  |
| H | 3.308130  | 0.120661  | 1.641289  | C            | -0.068830 | -3.014793 | 4.787907  |
| H | 4.000748  | -0.884238 | 0.357097  | H            | 0.472701  | -3.956718 | 4.941601  |
| H | 2.232403  | -0.846033 | 0.608511  | H            | 0.492049  | -2.223784 | 5.303719  |
| C | 4.628185  | -1.884378 | 2.864135  | H            | -1.047593 | -3.102232 | 5.275039  |
| H | 5.471999  | -2.055456 | 2.184044  |              |           |           |           |
| H | 4.735895  | -0.880822 | 3.290766  | <b>72-ts</b> |           |           |           |
| H | 4.684798  | -2.609260 | 3.681181  | C            | 4.125083  | -3.475150 | 3.001176  |
| C | 3.359318  | -3.482999 | 0.006579  | C            | 3.513945  | -3.473078 | 1.748198  |
| H | 4.429322  | -3.306499 | -0.163622 | C            | 3.036941  | -2.250703 | 1.277700  |
| H | 3.120148  | -4.491725 | -0.350290 | C            | 3.147035  | -1.051977 | 1.984225  |
| H | 2.786132  | -2.769737 | -0.594541 | C            | 3.777909  | -1.095073 | 3.229927  |
| C | 3.619552  | -4.526882 | 2.256205  | C            | 4.258755  | -2.298502 | 3.733273  |
| H | 3.204024  | -5.464997 | 1.872783  | H            | 4.509272  | -4.404268 | 3.415208  |
| H | 4.709270  | -4.563626 | 2.145937  | H            | 3.874757  | -0.182566 | 3.814716  |
| H | 3.378793  | -4.460269 | 3.324297  | H            | 4.741835  | -2.321925 | 4.706771  |
| C | -2.035020 | -1.227468 | 2.331854  | O            | 2.423701  | -2.183481 | 0.050552  |
| C | -2.852539 | 0.024567  | 2.075211  | C            | 3.401213  | -4.681608 | 0.829319  |
| C | -2.580567 | 1.114942  | 3.115775  | C            | 2.094316  | -4.554379 | 0.058085  |
| H | -2.841640 | 0.799840  | 4.135969  | C            | 1.684338  | -3.277714 | -0.320814 |
| H | -1.522911 | 1.411286  | 3.104205  | C            | 1.305641  | -5.624940 | -0.361577 |
| H | -3.170621 | 2.006091  | 2.866773  | C            | 0.540245  | -3.025790 | -1.080976 |
| C | -4.341627 | -0.380479 | 2.118547  | C            | 0.169855  | -5.414709 | -1.138073 |
| H | -4.460519 | -1.238880 | 1.439084  | H            | 1.580702  | -6.640989 | -0.089349 |
| H | -4.618566 | -0.735117 | 3.124687  | C            | -0.210546 | -4.126630 | -1.500042 |
| C | -5.279915 | 0.736951  | 1.654505  | H            | -0.425388 | -6.264021 | -1.463445 |
| H | -5.425970 | 1.465000  | 2.464578  | H            | -1.104882 | -3.974730 | -2.100904 |
| H | -4.757368 | 1.269392  | 0.846503  | P            | 2.360956  | 0.446935  | 1.271706  |
| C | -6.614277 | 0.240640  | 1.181710  | P            | 0.074928  | -1.275476 | -1.388328 |
| H | -7.444230 | 0.290296  | 1.891837  | C            | 4.563674  | -4.622963 | -0.181685 |
| C | -6.864838 | -0.282333 | -0.026090 | H            | 4.549431  | -3.690005 | -0.758081 |
| C | -8.231567 | -0.762995 | -0.408328 | H            | 5.524325  | -4.685679 | 0.344885  |
| H | -8.961888 | -0.610376 | 0.393881  | H            | 4.495080  | -5.461553 | -0.886062 |
| H | -8.596872 | -0.242605 | -1.305759 | C            | 3.486127  | -5.995004 | 1.597594  |

|    |           |           |           |   |           |           |           |
|----|-----------|-----------|-----------|---|-----------|-----------|-----------|
| H  | 3.432650  | -6.848589 | 0.913477  | C | 3.108752  | 0.320795  | -4.486619 |
| H  | 4.446707  | -6.077693 | 2.117227  | H | 2.501477  | 2.266807  | -3.781936 |
| H  | 2.681078  | -6.089005 | 2.335875  | H | 3.536965  | -1.735988 | -4.961975 |
| Cu | 0.214822  | 0.067789  | 0.423040  | H | 3.813474  | 0.716850  | -5.214329 |
| C  | 2.483837  | 1.636380  | 2.655661  | O | -1.062047 | 0.045493  | 2.182358  |
| C  | 3.633461  | 2.385563  | 2.926896  | C | -2.282098 | -0.609612 | 2.048433  |
| C  | 1.375592  | 1.737017  | 3.503674  | H | -2.864750 | -0.597190 | 2.990300  |
| C  | 3.673214  | 3.228025  | 4.032824  | H | -2.922131 | -0.149824 | 1.269693  |
| H  | 4.500953  | 2.308326  | 2.272449  | H | -2.154416 | -1.674039 | 1.774061  |
| C  | 1.424666  | 2.575606  | 4.613750  | H | -1.106091 | 1.129519  | 1.634180  |
| H  | 0.477970  | 1.154950  | 3.285170  | B | -5.738109 | 0.358897  | -0.111010 |
| C  | 2.569196  | 3.322721  | 4.877125  | O | -6.760612 | 0.818514  | 0.680261  |
| H  | 4.569085  | 3.809425  | 4.238802  | O | -5.318669 | -0.900743 | 0.239403  |
| H  | 0.561619  | 2.650529  | 5.271485  | C | -6.836035 | -0.079640 | 1.812276  |
| H  | 2.602019  | 3.981784  | 5.741833  | C | -6.256011 | -1.397567 | 1.222595  |
| C  | 3.599656  | 1.060381  | 0.065895  | C | -5.959079 | 0.528660  | 2.897753  |
| C  | 3.436271  | 2.365829  | -0.411451 | H | -6.323824 | 1.537851  | 3.118438  |
| C  | 4.647718  | 0.283799  | -0.432431 | H | -5.988972 | -0.057576 | 3.823355  |
| C  | 4.316875  | 2.894870  | -1.345791 | H | -4.915720 | 0.610402  | 2.565921  |
| H  | 2.612834  | 2.978334  | -0.042761 | C | -8.270896 | -0.170546 | 2.283971  |
| C  | 5.520728  | 0.809972  | -1.382199 | H | -8.364988 | -0.916608 | 3.083019  |
| H  | 4.794962  | -0.733872 | -0.072868 | H | -8.589943 | 0.796724  | 2.687419  |
| C  | 5.362999  | 2.115727  | -1.835275 | H | -8.951827 | -0.439710 | 1.471516  |
| H  | 4.176206  | 3.916562  | -1.696028 | C | -5.518406 | -2.277391 | 2.209362  |
| H  | 6.335350  | 0.196189  | -1.760248 | H | -6.201484 | -2.637199 | 2.989187  |
| H  | 6.052239  | 2.524717  | -2.570572 | H | -5.113570 | -3.151903 | 1.686653  |
| C  | -1.452150 | -1.498564 | -2.375077 | H | -4.685583 | -1.755588 | 2.690108  |
| C  | -1.429355 | -1.649416 | -3.765222 | C | -7.288724 | -2.219826 | 0.464587  |
| C  | -2.665078 | -1.632327 | -1.691115 | H | -6.771193 | -3.009289 | -0.092511 |
| C  | -2.598949 | -1.944049 | -4.458285 | H | -8.005968 | -2.695490 | 1.143106  |
| H  | -0.490794 | -1.546799 | -4.307668 | H | -7.844100 | -1.603990 | -0.252500 |
| C  | -3.830562 | -1.944971 | -2.385527 | C | -2.734069 | 1.945040  | -0.491705 |
| H  | -2.709512 | -1.498045 | -0.608556 | C | -1.700108 | 2.778151  | 0.228434  |
| C  | -3.798463 | -2.100509 | -3.768328 | C | -2.326865 | 3.690469  | 1.279034  |
| H  | -2.571249 | -2.057688 | -5.539504 | H | -3.000980 | 4.435770  | 0.837525  |
| H  | -4.762396 | -2.041487 | -1.832315 | H | -2.897936 | 3.089833  | 2.000218  |
| H  | -4.710311 | -2.338965 | -4.311127 | H | -1.538602 | 4.217022  | 1.827707  |
| C  | 1.306178  | -0.698268 | -2.613302 | C | -0.962610 | 3.593260  | -0.847386 |
| C  | 1.481940  | 0.682051  | -2.747195 | H | -0.594465 | 2.870194  | -1.595912 |
| C  | 2.054087  | -1.565124 | -3.413911 | H | -1.675942 | 4.245483  | -1.373750 |
| C  | 2.370764  | 1.189920  | -3.687969 | C | 0.219420  | 4.403200  | -0.320534 |
| H  | 0.929056  | 1.361508  | -2.093586 | H | -0.136056 | 5.289075  | 0.222208  |
| C  | 2.954918  | -1.055919 | -4.344238 | H | 0.729985  | 3.770259  | 0.425932  |
| H  | 1.928008  | -2.642686 | -3.310117 | C | 1.168197  | 4.772390  | -1.414911 |

|           |           |           |           |           |           |           |           |
|-----------|-----------|-----------|-----------|-----------|-----------|-----------|-----------|
| H         | 1.477297  | 3.923670  | -2.038546 | C         | 0.619429  | 0.234074  | -0.603369 |
| C         | 1.680161  | 5.970267  | -1.727375 | C         | 1.644126  | -0.736579 | -0.076529 |
| C         | 2.630977  | 6.127797  | -2.876801 | C         | 1.534257  | -0.968323 | 1.423414  |
| H         | 2.815108  | 5.178403  | -3.393602 | H         | 1.797529  | -0.068377 | 1.993242  |
| H         | 2.246171  | 6.847208  | -3.613610 | H         | 0.512628  | -1.260516 | 1.699495  |
| H         | 3.598173  | 6.526801  | -2.537039 | H         | 2.207124  | -1.777013 | 1.725082  |
| C         | 1.385560  | 7.245006  | -0.997360 | C         | 3.035227  | -0.235134 | -0.472784 |
| H         | 0.667586  | 7.124580  | -0.181773 | H         | 3.041989  | -0.097452 | -1.564843 |
| H         | 2.307283  | 7.668303  | -0.573846 | H         | 3.181691  | 0.763109  | -0.032638 |
| H         | 0.991289  | 8.002671  | -1.688958 | C         | 4.198380  | -1.144775 | -0.074503 |
| O         | -0.751828 | 1.956514  | 0.858391  | H         | 4.262406  | -1.209238 | 1.019939  |
| C         | -4.060980 | 2.086058  | -0.455080 | H         | 3.986541  | -2.161289 | -0.431244 |
| C         | -5.054985 | 1.246116  | -1.212368 | C         | 5.494020  | -0.659516 | -0.649444 |
| H         | -2.299497 | 1.166750  | -1.133233 | H         | 5.703139  | -0.971700 | -1.676474 |
| H         | -4.507569 | 2.855717  | 0.184109  | C         | 6.382247  | 0.151009  | -0.059332 |
| H         | -4.505095 | 0.603619  | -1.915603 | C         | 7.631525  | 0.583369  | -0.765444 |
| C         | -6.056576 | 2.128047  | -1.960494 | H         | 7.707340  | 0.152974  | -1.769604 |
| H         | -6.783717 | 1.530292  | -2.522375 | H         | 7.675378  | 1.677921  | -0.857330 |
| H         | -6.620787 | 2.752859  | -1.256386 | H         | 8.526267  | 0.288713  | -0.198568 |
| H         | -5.549315 | 2.796346  | -2.666864 | C         | 6.229873  | 0.706591  | 1.324190  |
|           |           |           |           | H         | 5.303067  | 0.398345  | 1.817801  |
| <b>73</b> |           |           |           | H         | 7.073271  | 0.406404  | 1.961822  |
| H         | 0.574425  | -2.280252 | -0.591211 | H         | 6.244468  | 1.805106  | 1.296638  |
| B         | -2.565021 | 1.013173  | -0.288760 | O         | 1.474035  | -1.979389 | -0.767446 |
| O         | -3.164670 | 0.841586  | 0.933668  | C         | -0.210882 | 1.000605  | 0.106177  |
| O         | -3.107399 | 0.230744  | -1.271907 | C         | -1.276037 | 1.893156  | -0.469942 |
| C         | -3.956349 | -0.364110 | 0.824051  | H         | 0.587672  | 0.283838  | -1.696779 |
| C         | -4.274151 | -0.409131 | -0.699725 | H         | -0.195566 | 0.953368  | 1.200023  |
| C         | -3.058202 | -1.506226 | 1.278547  | H         | -1.079769 | 2.039305  | -1.541581 |
| H         | -2.705348 | -1.293118 | 2.293864  | C         | -1.345662 | 3.233258  | 0.260776  |
| H         | -3.589606 | -2.464374 | 1.291907  | H         | -2.134116 | 3.875684  | -0.146659 |
| H         | -2.178329 | -1.599395 | 0.628349  | H         | -1.563643 | 3.079662  | 1.325429  |
| C         | -5.165474 | -0.251931 | 1.726381  | H         | -0.396704 | 3.778413  | 0.191340  |
| H         | -5.827545 | -1.116093 | 1.591618  |           |           |           |           |
| H         | -4.845346 | -0.232784 | 2.773955  | <b>74</b> |           |           |           |
| H         | -5.735883 | 0.660007  | 1.528805  | C         | -1.767424 | -2.037473 | -0.736654 |
| C         | -4.407957 | -1.799802 | -1.282123 | C         | -2.713002 | -2.110026 | 0.441373  |
| H         | -5.224989 | -2.344998 | -0.793112 | C         | -2.163822 | -2.902653 | 1.618982  |
| H         | -4.640762 | -1.732157 | -2.350465 | H         | -2.840254 | -2.803630 | 2.474344  |
| H         | -3.485964 | -2.377446 | -1.172203 | H         | -2.065696 | -3.968524 | 1.378364  |
| C         | -5.477418 | 0.438312  | -1.083481 | H         | -1.177521 | -2.533817 | 1.929000  |
| H         | -5.509258 | 0.533677  | -2.174133 | C         | -4.028642 | -2.702469 | -0.073844 |
| H         | -6.415428 | -0.021699 | -0.752459 | H         | -4.358395 | -2.077581 | -0.918608 |
| H         | -5.412101 | 1.445044  | -0.655064 | H         | -3.824977 | -3.702525 | -0.484293 |

|   |           |           |           |    |           |           |           |
|---|-----------|-----------|-----------|----|-----------|-----------|-----------|
| C | -5.161181 | -2.774917 | 0.952077  | C  | 2.619889  | 0.448873  | 1.465928  |
| H | -4.905315 | -3.498148 | 1.738277  | C  | 3.829428  | -0.030772 | 1.959332  |
| H | -5.247449 | -1.798931 | 1.446672  | C  | 5.029708  | 0.535414  | 1.534228  |
| C | -6.461011 | -3.171610 | 0.316346  | H  | 5.978860  | 1.984340  | 0.278442  |
| H | -6.692402 | -4.239786 | 0.310572  | H  | 3.834913  | -0.865308 | 2.658347  |
| C | -7.329392 | -2.346948 | -0.283802 | H  | 5.972885  | 0.157607  | 1.921026  |
| C | -8.586743 | -2.860184 | -0.916493 | O  | 1.434167  | 2.018985  | 0.214751  |
| H | -8.681963 | -3.946929 | -0.820084 | C  | 3.790338  | 3.286758  | -0.847961 |
| H | -9.474167 | -2.396823 | -0.462085 | C  | 2.421687  | 3.362957  | -1.515132 |
| H | -8.622996 | -2.606478 | -1.985435 | C  | 1.320040  | 2.735618  | -0.940497 |
| C | -7.135294 | -0.864663 | -0.393701 | C  | 2.182748  | 4.107190  | -2.672203 |
| H | -6.226309 | -0.509723 | 0.101944  | C  | 0.033107  | 2.781503  | -1.487925 |
| H | -7.077582 | -0.562743 | -1.449405 | C  | 0.909173  | 4.213267  | -3.220989 |
| H | -7.992849 | -0.325373 | 0.032416  | H  | 3.006917  | 4.628281  | -3.154257 |
| O | -3.045785 | -0.781347 | 0.876370  | C  | -0.163306 | 3.548430  | -2.635855 |
| C | -0.629164 | -2.754510 | -0.913027 | H  | 0.754703  | 4.809432  | -4.116381 |
| H | -0.248692 | -3.349202 | -0.074189 | H  | -1.151319 | 3.601238  | -3.089152 |
| C | 0.159820  | -2.884950 | -2.164156 | P  | 0.978126  | -0.291661 | 1.813503  |
| H | -0.367599 | -2.342951 | -2.969513 | P  | -1.242374 | 1.665966  | -0.775215 |
| B | 1.636349  | -2.180142 | -1.944740 | C  | 3.992681  | 4.566531  | -0.017326 |
| O | 2.571409  | -2.436381 | -3.025954 | H  | 3.212138  | 4.663101  | 0.747942  |
| O | 2.309185  | -2.633199 | -0.726984 | H  | 4.966840  | 4.547690  | 0.487422  |
| C | 3.863955  | -2.532923 | -2.451691 | H  | 3.952618  | 5.453967  | -0.661588 |
| C | 3.571614  | -3.185670 | -1.068303 | C  | 4.894231  | 3.178109  | -1.902429 |
| C | 4.748026  | -3.361924 | -3.367258 | H  | 4.907890  | 4.057451  | -2.554525 |
| H | 4.918205  | -2.821647 | -4.306766 | H  | 5.882842  | 3.123977  | -1.435619 |
| H | 5.726853  | -3.554674 | -2.908031 | H  | 4.756000  | 2.285777  | -2.525256 |
| H | 4.280200  | -4.320827 | -3.612456 | Cu | -0.149904 | -0.414329 | -0.294524 |
| C | 4.471087  | -1.134311 | -2.306724 | C  | 1.389481  | -1.717892 | 2.898937  |
| H | 5.509934  | -1.169860 | -1.953054 | C  | 1.431705  | -1.603870 | 4.292907  |
| H | 4.467982  | -0.650165 | -3.291841 | C  | 1.690746  | -2.948746 | 2.302462  |
| H | 3.885526  | -0.515230 | -1.613836 | C  | 1.769389  | -2.702310 | 5.077686  |
| C | 3.439999  | -4.706243 | -1.150565 | H  | 1.203000  | -0.653106 | 4.771295  |
| H | 4.415005  | -5.200324 | -1.251072 | C  | 2.035126  | -4.041131 | 3.093453  |
| H | 2.972983  | -5.062278 | -0.221458 | H  | 1.693044  | -3.035831 | 1.213802  |
| H | 2.805332  | -5.012519 | -1.987493 | C  | 2.071396  | -3.922591 | 4.480213  |
| C | 4.594284  | -2.860289 | 0.008411  | H  | 1.798021  | -2.601950 | 6.160279  |
| H | 4.314340  | -3.353898 | 0.949400  | H  | 2.276097  | -4.990960 | 2.618868  |
| H | 5.589274  | -3.227839 | -0.278433 | H  | 2.335674  | -4.779770 | 5.095412  |
| H | 4.662398  | -1.786040 | 0.201945  | C  | 0.250974  | 0.887732  | 3.021040  |
| H | -2.211009 | -0.290989 | 0.931771  | C  | -1.083770 | 0.705777  | 3.399966  |
| C | 5.028292  | 1.566324  | 0.602927  | C  | 0.984509  | 1.924469  | 3.603309  |
| C | 3.835223  | 2.091370  | 0.096640  | C  | -1.671245 | 1.544908  | 4.339483  |
| C | 2.658351  | 1.525872  | 0.572704  | H  | -1.676807 | -0.100661 | 2.965058  |

|              |           |           |           |   |           |           |           |
|--------------|-----------|-----------|-----------|---|-----------|-----------|-----------|
| C            | 0.391784  | 2.770708  | 4.536188  | H | -1.816320 | -4.262752 | 1.820331  |
| H            | 2.029604  | 2.069920  | 3.334251  | H | -0.965092 | -2.826852 | 2.442522  |
| C            | -0.936683 | 2.583829  | 4.903975  | C | -3.799342 | -2.922499 | 0.424745  |
| H            | -2.712038 | 1.396096  | 4.618352  | H | -4.094933 | -2.286788 | -0.424470 |
| H            | 0.973196  | 3.576274  | 4.979073  | H | -3.609587 | -3.924051 | 0.008239  |
| H            | -1.401398 | 3.248352  | 5.629005  | C | -4.963670 | -2.971360 | 1.418148  |
| C            | -2.506497 | 1.636682  | -2.102156 | H | -4.792064 | -3.759587 | 2.163830  |
| C            | -2.366255 | 0.672919  | -3.106991 | H | -4.977949 | -2.022695 | 1.971867  |
| C            | -3.562104 | 2.550037  | -2.178713 | C | -6.279674 | -3.199339 | 0.732122  |
| C            | -3.268634 | 0.616307  | -4.163861 | H | -6.685973 | -4.213502 | 0.758068  |
| H            | -1.535669 | -0.032196 | -3.062453 | C | -6.964291 | -2.273639 | 0.046702  |
| C            | -4.468485 | 2.487954  | -3.232738 | C | -8.246732 | -2.602291 | -0.654567 |
| H            | -3.677987 | 3.312927  | -1.411061 | H | -8.523043 | -3.655466 | -0.534740 |
| C            | -4.324931 | 1.521115  | -4.223870 | H | -9.075033 | -1.985519 | -0.277272 |
| H            | -3.148498 | -0.138297 | -4.937367 | H | -8.173584 | -2.388901 | -1.730766 |
| H            | -5.287987 | 3.201101  | -3.281186 | C | -6.508104 | -0.853674 | -0.110323 |
| H            | -5.036310 | 1.473408  | -5.044862 | H | -5.648509 | -0.604075 | 0.521350  |
| C            | -2.018612 | 2.690017  | 0.538391  | H | -6.214068 | -0.654692 | -1.152874 |
| C            | -3.268611 | 2.323491  | 1.055846  | H | -7.321794 | -0.150874 | 0.117940  |
| C            | -1.375884 | 3.818910  | 1.053383  | O | -2.821687 | -1.064706 | 1.504052  |
| C            | -3.867116 | 3.086980  | 2.051120  | C | -0.689896 | -3.264510 | -0.629606 |
| H            | -3.778234 | 1.439490  | 0.675850  | H | -0.403301 | -4.007524 | 0.129220  |
| C            | -1.970013 | 4.567927  | 2.064560  | C | -0.154011 | -3.474599 | -1.886506 |
| H            | -0.405725 | 4.120494  | 0.662341  | H | -0.543892 | -2.836137 | -2.688923 |
| C            | -3.218185 | 4.208273  | 2.560785  | B | 1.705911  | -2.179251 | -1.679834 |
| H            | -4.842918 | 2.797932  | 2.435063  | O | 2.449865  | -2.681263 | -2.753777 |
| H            | -1.453997 | 5.439479  | 2.461024  | O | 2.342235  | -2.426417 | -0.461457 |
| H            | -3.684791 | 4.799115  | 3.345794  | C | 3.769644  | -2.922313 | -2.240763 |
| C            | 1.297592  | 0.010570  | -3.017025 | C | 3.509940  | -3.214022 | -0.726805 |
| H            | 2.306325  | 0.305541  | -3.347198 | C | 4.403694  | -4.063606 | -3.008144 |
| H            | 0.703204  | 0.925528  | -2.916077 | H | 4.548006  | -3.771264 | -4.054659 |
| H            | 0.856759  | -0.596797 | -3.824228 | H | 5.386845  | -4.313019 | -2.589224 |
| O            | 1.339184  | -0.683325 | -1.796471 | H | 3.778139  | -4.961343 | -2.990097 |
| H            | -2.200400 | -1.534933 | -1.607825 | C | 4.568722  | -1.640844 | -2.460483 |
| C            | 0.250686  | -4.363108 | -2.541209 | H | 5.614799  | -1.745630 | -2.148036 |
| H            | 0.904696  | -4.497764 | -3.411077 | H | 4.551293  | -1.396276 | -3.528968 |
| H            | 0.682133  | -4.942681 | -1.713284 | H | 4.126173  | -0.799051 | -1.910909 |
| H            | -0.729608 | -4.802822 | -2.772345 | C | 3.189053  | -4.672925 | -0.434568 |
|              |           |           |           | H | 4.081694  | -5.305690 | -0.509525 |
|              |           |           |           | H | 2.804950  | -4.746138 | 0.590173  |
| <b>75-ts</b> |           |           |           | H | 2.426202  | -5.063471 | -1.111497 |
| C            | -1.504560 | -2.178892 | -0.195204 | C | 4.632319  | -2.766177 | 0.192110  |
| C            | -2.479074 | -2.360062 | 0.961888  | H | 4.343555  | -2.940380 | 1.237763  |
| C            | -1.937257 | -3.209765 | 2.104530  | H | 5.546510  | -3.339205 | -0.011075 |
| H            | -2.628179 | -3.167478 | 2.954002  |   |           |           |           |



|    |           |           |           |   |           |           |           |
|----|-----------|-----------|-----------|---|-----------|-----------|-----------|
| H  | 4.853378  | -1.701458 | 0.075025  | C | 0.844865  | 1.357630  | 2.834235  |
| H  | -2.000916 | -0.551160 | 1.441514  | C | -0.341285 | 1.114719  | 3.534230  |
| C  | 4.865899  | 2.080867  | -0.685614 | C | 1.556908  | 2.531822  | 3.090233  |
| C  | 3.545984  | 2.474815  | -0.915439 | C | -0.802064 | 2.024451  | 4.478297  |
| C  | 2.564275  | 1.867404  | -0.136804 | H | -0.911295 | 0.203726  | 3.338533  |
| C  | 2.831796  | 0.888899  | 0.825811  | C | 1.090744  | 3.445776  | 4.031185  |
| C  | 4.165076  | 0.549276  | 1.045480  | H | 2.481734  | 2.734041  | 2.549774  |
| C  | 5.175243  | 1.139456  | 0.290056  | C | -0.088496 | 3.194563  | 4.725053  |
| H  | 5.672043  | 2.529720  | -1.260793 | H | -1.729193 | 1.826240  | 5.011557  |
| H  | 4.412538  | -0.194096 | 1.800886  | H | 1.652048  | 4.358086  | 4.221221  |
| H  | 6.212063  | 0.860592  | 0.463079  | H | -0.457018 | 3.912693  | 5.454295  |
| O  | 1.249991  | 2.235159  | -0.257486 | C | -3.007681 | 1.167202  | -1.641119 |
| C  | 3.145051  | 3.596265  | -1.865112 | C | -2.974404 | 0.153974  | -2.606902 |
| C  | 1.713176  | 3.358339  | -2.326532 | C | -4.139692 | 1.983636  | -1.557419 |
| C  | 0.824190  | 2.719191  | -1.464158 | C | -4.050711 | -0.043206 | -3.466174 |
| C  | 1.194590  | 3.818160  | -3.537719 | H | -2.087916 | -0.473930 | -2.699220 |
| C  | -0.528614 | 2.519191  | -1.754382 | C | -5.215610 | 1.787692  | -2.418272 |
| C  | -0.151457 | 3.658753  | -3.852702 | H | -4.177789 | 2.784543  | -0.821398 |
| H  | 1.846841  | 4.320634  | -4.247897 | C | -5.173728 | 0.774849  | -3.372859 |
| C  | -1.010409 | 3.017908  | -2.966847 | H | -4.009067 | -0.833811 | -4.211483 |
| H  | -0.532398 | 4.036592  | -4.798094 | H | -6.088316 | 2.432747  | -2.345919 |
| H  | -2.056750 | 2.876571  | -3.230320 | H | -6.014925 | 0.623877  | -4.045330 |
| P  | 1.385130  | 0.088722  | 1.619617  | C | -2.085142 | 2.562636  | 0.689006  |
| P  | -1.495766 | 1.429642  | -0.630118 | C | -3.098010 | 2.115084  | 1.549273  |
| C  | 3.177113  | 4.919220  | -1.075905 | C | -1.544437 | 3.836005  | 0.881620  |
| H  | 2.503240  | 4.883638  | -0.210324 | C | -3.572510 | 2.939499  | 2.562197  |
| H  | 4.192391  | 5.117283  | -0.709514 | H | -3.523226 | 1.119518  | 1.419588  |
| H  | 2.867039  | 5.753440  | -1.717984 | C | -2.007111 | 4.648820  | 1.913129  |
| C  | 4.104113  | 3.697643  | -3.048387 | H | -0.763447 | 4.202630  | 0.216461  |
| H  | 3.830043  | 4.531761  | -3.702440 | C | -3.025966 | 4.206362  | 2.749964  |
| H  | 5.125521  | 3.899063  | -2.709823 | H | -4.367589 | 2.585324  | 3.214817  |
| H  | 4.109460  | 2.775090  | -3.641271 | H | -1.575375 | 5.637616  | 2.052748  |
| Cu | -0.211279 | -0.546155 | 0.066911  | H | -3.393120 | 4.847139  | 3.548657  |
| C  | 2.116376  | -1.167388 | 2.740077  | C | 0.813998  | -0.446881 | -3.083766 |
| C  | 2.911166  | -0.810851 | 3.835635  | H | 1.772506  | -0.218282 | -3.570481 |
| C  | 1.827107  | -2.515427 | 2.516704  | H | 0.227316  | 0.474659  | -3.012285 |
| C  | 3.426989  | -1.788513 | 4.678897  | H | 0.273247  | -1.163797 | -3.719563 |
| H  | 3.122587  | 0.240344  | 4.032983  | O | 1.019850  | -0.954420 | -1.783876 |
| C  | 2.327847  | -3.492792 | 3.373728  | H | -2.040853 | -1.726386 | -1.040736 |
| H  | 1.226148  | -2.789259 | 1.651252  | C | 0.273433  | -4.845704 | -2.333695 |
| C  | 3.133052  | -3.131478 | 4.449364  | H | 1.187831  | -4.824555 | -2.942265 |
| H  | 4.049060  | -1.502287 | 5.523801  | H | 0.450041  | -5.504934 | -1.473318 |
| H  | 2.088816  | -4.539926 | 3.197995  | H | -0.503826 | -5.332153 | -2.941880 |
| H  | 3.526802  | -3.894787 | 5.116660  |   |           |           |           |

|    |           |           |           |    |           |           |           |
|----|-----------|-----------|-----------|----|-----------|-----------|-----------|
| 76 |           |           |           | C  | -2.211752 | -2.485858 | -0.483242 |
| C  | 2.359261  | 0.090251  | -1.259603 | C  | -3.919929 | -3.971846 | -1.337393 |
| C  | 3.414524  | 0.792452  | -0.431105 | H  | -5.905765 | -3.178003 | -1.503511 |
| C  | 3.270289  | 2.311277  | -0.422662 | C  | -2.597506 | -3.734745 | -0.977812 |
| H  | 3.905674  | 2.739019  | 0.360462  | H  | -4.206617 | -4.946616 | -1.723774 |
| H  | 3.559391  | 2.763228  | -1.381503 | H  | -1.854773 | -4.520387 | -1.097730 |
| H  | 2.234510  | 2.601642  | -0.206441 | P  | -0.914957 | 1.849743  | 0.026031  |
| C  | 4.816317  | 0.380459  | -0.896155 | P  | -0.473591 | -1.986340 | -0.148576 |
| H  | 4.866349  | -0.718648 | -0.862705 | C  | -5.915277 | -0.609334 | 1.029258  |
| H  | 4.923352  | 0.665743  | -1.955642 | H  | -5.037111 | -0.510579 | 1.679378  |
| C  | 5.985332  | 0.951473  | -0.092648 | H  | -6.603206 | 0.215144  | 1.255284  |
| H  | 5.985240  | 2.049055  | -0.187298 | H  | -6.414277 | -1.557111 | 1.267468  |
| H  | 5.827037  | 0.733912  | 0.970980  | C  | -6.780639 | -0.709834 | -1.307607 |
| C  | 7.296616  | 0.424112  | -0.580426 | H  | -7.306516 | -1.643130 | -1.078918 |
| H  | 7.496458  | 0.619199  | -1.639839 | H  | -7.481316 | 0.102446  | -1.086254 |
| C  | 8.227862  | -0.261847 | 0.095320  | H  | -6.553796 | -0.692072 | -2.380117 |
| C  | 9.486863  | -0.723000 | -0.577008 | Cu | 0.375545  | 0.098103  | -0.729595 |
| H  | 9.520823  | -0.434347 | -1.632954 | C  | -0.277298 | 3.502327  | -0.439040 |
| H  | 10.374854 | -0.306476 | -0.079980 | C  | 0.110670  | 4.464939  | 0.494373  |
| H  | 9.589171  | -1.816053 | -0.517372 | C  | -0.082746 | 3.755298  | -1.802898 |
| C  | 8.140876  | -0.632201 | 1.544828  | C  | 0.704345  | 5.652065  | 0.070336  |
| H  | 7.207453  | -0.320370 | 2.020756  | H  | -0.037696 | 4.283253  | 1.557527  |
| H  | 8.238077  | -1.719701 | 1.670356  | C  | 0.502174  | 4.942102  | -2.224514 |
| H  | 8.972769  | -0.185223 | 2.107561  | H  | -0.390217 | 3.009302  | -2.536881 |
| O  | 3.295286  | 0.328565  | 0.932949  | C  | 0.906929  | 5.889590  | -1.285056 |
| C  | 1.744241  | 0.736444  | -2.401135 | H  | 1.011106  | 6.392689  | 0.805225  |
| H  | 1.811533  | 1.830001  | -2.427675 | H  | 0.650939  | 5.124124  | -3.286785 |
| C  | 0.962426  | 0.177476  | -3.376581 | H  | 1.376880  | 6.814061  | -1.612120 |
| H  | 0.866294  | -0.909806 | -3.430726 | C  | -0.980411 | 1.901532  | 1.857305  |
| H  | 2.365570  | 0.058674  | 0.986134  | C  | 0.204304  | 1.653367  | 2.560065  |
| C  | -5.375905 | 1.896069  | -1.217579 | C  | -2.151081 | 2.180197  | 2.566537  |
| C  | -4.789494 | 0.731299  | -0.724602 | C  | 0.217684  | 1.696087  | 3.948969  |
| C  | -3.446325 | 0.805344  | -0.363142 | H  | 1.124500  | 1.433836  | 2.015200  |
| C  | -2.679313 | 1.966296  | -0.459224 | C  | -2.136596 | 2.211671  | 3.958375  |
| C  | -3.309539 | 3.118897  | -0.932555 | H  | -3.079421 | 2.374266  | 2.030351  |
| C  | -4.645896 | 3.077922  | -1.317482 | C  | -0.953540 | 1.972162  | 4.650376  |
| H  | -6.420825 | 1.890426  | -1.518178 | H  | 1.143588  | 1.498168  | 4.484556  |
| H  | -2.746982 | 4.047149  | -1.009220 | H  | -3.053712 | 2.426454  | 4.502259  |
| H  | -5.126636 | 3.977660  | -1.693000 | H  | -0.943978 | 1.995817  | 5.737625  |
| O  | -2.811463 | -0.298657 | 0.145132  | C  | 0.459314  | -3.501050 | -0.589265 |
| C  | -5.520820 | -0.577925 | -0.460930 | C  | 1.172796  | -3.525674 | -1.789289 |
| C  | -4.538749 | -1.714281 | -0.713094 | C  | 0.458047  | -4.639553 | 0.225618  |
| C  | -3.206208 | -1.513138 | -0.358407 | C  | 1.870590  | -4.667050 | -2.175044 |
| C  | -4.879032 | -2.970548 | -1.211930 | H  | 1.187303  | -2.639264 | -2.421041 |

|              |           |           |           |    |           |           |           |
|--------------|-----------|-----------|-----------|----|-----------|-----------|-----------|
| C            | 1.153199  | -5.779677 | -0.159771 | H  | 9.095375  | 0.765067  | -1.015205 |
| H            | -0.094102 | -4.632067 | 1.165119  | H  | 9.889100  | 2.134118  | -0.217029 |
| C            | 1.860931  | -5.794179 | -1.360443 | H  | 10.744115 | 0.608684  | -0.382830 |
| H            | 2.426315  | -4.671669 | -3.109589 | O  | 5.081312  | 0.196260  | -1.627976 |
| H            | 1.144983  | -6.659895 | 0.478799  | C  | 2.441936  | -0.021357 | 0.989959  |
| H            | 2.409016  | -6.685288 | -1.657259 | H  | 2.522719  | -1.092409 | 1.213397  |
| C            | -0.335526 | -1.983099 | 1.683017  | C  | 1.400903  | 0.623004  | 1.638157  |
| C            | 0.956491  | -1.874922 | 2.214484  | H  | 1.381484  | 1.718337  | 1.609062  |
| C            | -1.427820 | -2.000786 | 2.550116  | H  | 4.358481  | 0.030949  | -2.246082 |
| C            | 1.150573  | -1.776763 | 3.585842  | C  | -3.435091 | -2.938499 | 3.246464  |
| H            | 1.818993  | -1.876429 | 1.545591  | C  | -3.457173 | -1.652218 | 2.708934  |
| C            | -1.231430 | -1.896791 | 3.926121  | C  | -2.738483 | -1.443015 | 1.533548  |
| H            | -2.438713 | -2.093082 | 2.154812  | C  | -1.965444 | -2.427241 | 0.913839  |
| C            | 0.053324  | -1.780678 | 4.444856  | C  | -1.987329 | -3.708219 | 1.472402  |
| H            | 2.159198  | -1.690580 | 3.984039  | C  | -2.724359 | -3.961105 | 2.624447  |
| H            | -2.090623 | -1.906755 | 4.593165  | H  | -3.982413 | -3.152622 | 4.161409  |
| H            | 0.201043  | -1.691089 | 5.518763  | H  | -1.403911 | -4.505126 | 1.015486  |
| H            | 2.612589  | -0.967962 | -1.417593 | H  | -2.732757 | -4.960646 | 3.051550  |
| C            | 0.311581  | 0.965826  | -4.469831 | O  | -2.748254 | -0.206058 | 0.937653  |
| H            | 0.654434  | 0.658290  | -5.468658 | C  | -4.237930 | -0.478260 | 3.283966  |
| H            | -0.783718 | 0.865612  | -4.477634 | C  | -3.427006 | 0.781775  | 3.012285  |
| H            | 0.543036  | 2.035191  | -4.369167 | C  | -2.766752 | 0.873864  | 1.789171  |
|              |           |           |           | C  | -3.347267 | 1.887669  | 3.859114  |
|              |           |           |           | C  | -2.096736 | 2.020236  | 1.355911  |
| <b>77-ts</b> |           |           |           | C  | -2.656910 | 3.034201  | 3.476360  |
| C            | 3.323663  | 0.473784  | -0.022143 | H  | -3.832009 | 1.860810  | 4.832059  |
| C            | 4.613009  | -0.259267 | -0.347123 | C  | -2.047657 | 3.109161  | 2.227053  |
| C            | 4.405296  | -1.770749 | -0.419783 | H  | -2.605616 | 3.882993  | 4.153436  |
| H            | 5.268743  | -2.245197 | -0.898793 | H  | -1.522044 | 4.013820  | 1.927793  |
| H            | 4.275270  | -2.225936 | 0.571281  | P  | -0.826715 | -1.905343 | -0.428261 |
| H            | 3.511669  | -2.003472 | -1.016507 | P  | -1.258750 | 1.923476  | -0.269534 |
| C            | 5.726625  | 0.108326  | 0.635680  | C  | -5.573828 | -0.358504 | 2.524505  |
| H            | 5.829706  | 1.204243  | 0.625538  | H  | -5.416357 | -0.214488 | 1.449050  |
| H            | 5.385182  | -0.160840 | 1.648155  | H  | -6.168674 | -1.269648 | 2.665163  |
| C            | 7.094789  | -0.520900 | 0.369004  | H  | -6.147791 | 0.496191  | 2.904018  |
| H            | 7.004733  | -1.617302 | 0.427858  | C  | -4.533842 | -0.661223 | 4.767317  |
| H            | 7.398522  | -0.291689 | -0.659511 | H  | -5.109405 | 0.187498  | 5.152434  |
| C            | 8.110685  | -0.064403 | 1.366493  | H  | -5.147612 | -1.553350 | 4.931958  |
| H            | 7.864682  | -0.305608 | 2.406492  | H  | -3.615401 | -0.756375 | 5.358558  |
| C            | 9.246301  | 0.613851  | 1.154707  | Cu | 0.220816  | 0.153855  | -0.163295 |
| C            | 10.135533 | 1.006691  | 2.296738  | C  | 0.168408  | -3.425548 | -0.672238 |
| H            | 9.740424  | 0.672093  | 3.261900  | C  | -0.152748 | -4.408564 | -1.612875 |
| H            | 11.143691 | 0.584934  | 2.175294  | C  | 1.269753  | -3.621926 | 0.166765  |
| H            | 10.264603 | 2.097677  | 2.339467  | C  | 0.619435  | -5.562329 | -1.712423 |
| C            | 9.753560  | 1.043832  | -0.188177 |    |           |           |           |

|   |           |           |           |              |           |           |           |
|---|-----------|-----------|-----------|--------------|-----------|-----------|-----------|
| H | -1.010945 | -4.272328 | -2.269154 | H            | 0.817432  | 1.866536  | -2.703585 |
| C | 2.037034  | -4.777561 | 0.072092  | H            | 2.556735  | 1.578620  | -2.871645 |
| H | 1.520306  | -2.861352 | 0.906760  | H            | 2.436696  | 0.261089  | -1.109327 |
| C | 1.713286  | -5.748806 | -0.871726 | C            | 0.673372  | -0.016455 | 2.793303  |
| H | 0.362980  | -6.320808 | -2.448434 | H            | -0.370786 | 0.318352  | 2.868893  |
| H | 2.892184  | -4.914949 | 0.730238  | H            | 0.657291  | -1.111046 | 2.688752  |
| H | 2.314717  | -6.651117 | -0.952641 | H            | 1.145263  | 0.211739  | 3.761192  |
| C | -1.844623 | -1.857668 | -1.946291 |              |           |           |           |
| C | -1.182607 | -1.492841 | -3.126130 | <b>78-ts</b> |           |           |           |
| C | -3.202722 | -2.171873 | -1.987342 | C            | 2.190607  | 0.929889  | -1.600256 |
| C | -1.868874 | -1.474205 | -4.333720 | C            | 3.010121  | 1.497896  | -0.459002 |
| H | -0.125432 | -1.221437 | -3.078832 | C            | 2.747328  | 2.973840  | -0.185563 |
| C | -3.893765 | -2.124745 | -3.196846 | H            | 3.263146  | 3.269905  | 0.734415  |
| H | -3.723154 | -2.463673 | -1.075760 | H            | 3.109184  | 3.612671  | -1.001387 |
| C | -3.227026 | -1.786680 | -4.369856 | H            | 1.675991  | 3.167064  | -0.047755 |
| H | -1.346764 | -1.199827 | -5.248271 | C            | 4.494421  | 1.244724  | -0.748607 |
| H | -4.953954 | -2.366333 | -3.221773 | H            | 4.608270  | 0.166495  | -0.938670 |
| H | -3.766908 | -1.760070 | -5.313868 | H            | 4.764479  | 1.757511  | -1.683996 |
| C | -0.541144 | 3.596129  | -0.489377 | C            | 5.454866  | 1.646460  | 0.374814  |
| C | 0.850377  | 3.720861  | -0.518017 | H            | 5.520292  | 2.741323  | 0.434701  |
| C | -1.333515 | 4.737668  | -0.659224 | H            | 5.027108  | 1.311512  | 1.328855  |
| C | 1.443594  | 4.966904  | -0.701400 | C            | 6.827817  | 1.074264  | 0.178349  |
| H | 1.467782  | 2.829335  | -0.409252 | H            | 7.554062  | 1.708817  | -0.336111 |
| C | -0.740976 | 5.981786  | -0.839909 | C            | 7.221566  | -0.156243 | 0.532918  |
| H | -2.419793 | 4.649655  | -0.654207 | C            | 8.611395  | -0.644257 | 0.259573  |
| C | 0.648167  | 6.096813  | -0.860344 | H            | 9.222391  | 0.115147  | -0.240024 |
| H | 2.527337  | 5.051883  | -0.726055 | H            | 9.119305  | -0.934458 | 1.190554  |
| H | -1.363008 | 6.864127  | -0.970372 | H            | 8.597936  | -1.543077 | -0.373415 |
| H | 1.109638  | 7.070637  | -1.007045 | C            | 6.329286  | -1.152262 | 1.211310  |
| C | -2.669059 | 1.951346  | -1.446733 | H            | 5.321138  | -0.769424 | 1.401262  |
| C | -2.397501 | 1.644345  | -2.783045 | H            | 6.231144  | -2.058134 | 0.595817  |
| C | -3.977147 | 2.274142  | -1.074536 | H            | 6.762211  | -1.478489 | 2.167690  |
| C | -3.411220 | 1.674924  | -3.734175 | O            | 2.736392  | 0.753601  | 0.745068  |
| H | -1.386217 | 1.360519  | -3.077201 | C            | 1.654439  | 1.700984  | -2.618542 |
| C | -4.993186 | 2.293156  | -2.025601 | H            | 1.529890  | 2.771765  | -2.407841 |
| H | -4.206793 | 2.511121  | -0.035982 | C            | 1.085448  | 1.254552  | -3.849964 |
| C | -4.711585 | 1.997713  | -3.356336 | H            | 1.491009  | 0.294082  | -4.201211 |
| H | -3.186055 | 1.430728  | -4.770165 | H            | 1.792464  | 0.534696  | 0.695615  |
| H | -6.008258 | 2.543295  | -1.725241 | C            | -5.561334 | 0.800510  | -0.789329 |
| H | -5.506795 | 2.013867  | -4.098027 | C            | -4.696548 | -0.215482 | -0.382112 |
| H | 3.474384  | 1.564077  | 0.001611  | C            | -3.409179 | 0.163909  | -0.012171 |
| O | 1.535140  | 0.088678  | -1.857485 | C            | -2.954161 | 1.482820  | -0.026929 |
| C | 1.572454  | 1.073066  | -2.849604 | C            | -3.855106 | 2.473255  | -0.418401 |
| H | 1.402292  | 0.643303  | -3.850504 | C            | -5.147948 | 2.130135  | -0.802106 |

|    |           |           |           |           |           |           |           |
|----|-----------|-----------|-----------|-----------|-----------|-----------|-----------|
| H  | -6.577180 | 0.559125  | -1.092232 | H         | 1.102441  | 1.366772  | 4.730331  |
| H  | -3.537442 | 3.514042  | -0.438043 | H         | -3.188638 | 1.499326  | 4.947147  |
| H  | -5.842856 | 2.906402  | -1.112311 | H         | -0.984648 | 1.325492  | 6.078487  |
| O  | -2.507897 | -0.784029 | 0.405752  | C         | 1.421225  | -2.932579 | -0.750150 |
| C  | -5.072352 | -1.683454 | -0.231803 | C         | 1.749652  | -2.723764 | -2.094195 |
| C  | -3.841456 | -2.513127 | -0.572012 | C         | 2.005773  | -3.997668 | -0.060074 |
| C  | -2.596157 | -2.016313 | -0.189943 | C         | 2.647324  | -3.566960 | -2.740433 |
| C  | -3.861954 | -3.762947 | -1.189085 | H         | 1.289577  | -1.890571 | -2.628647 |
| C  | -1.395179 | -2.699168 | -0.388504 | C         | 2.912998  | -4.833430 | -0.704418 |
| C  | -2.685635 | -4.480794 | -1.390852 | H         | 1.752147  | -4.175456 | 0.983849  |
| H  | -4.806532 | -4.190981 | -1.515761 | C         | 3.233757  | -4.619367 | -2.042713 |
| C  | -1.461055 | -3.958196 | -0.990626 | H         | 2.895086  | -3.396798 | -3.785428 |
| H  | -2.726237 | -5.457332 | -1.866647 | H         | 3.368447  | -5.657740 | -0.160619 |
| H  | -0.545509 | -4.518270 | -1.171645 | H         | 3.943284  | -5.274480 | -2.542552 |
| P  | -1.191064 | 1.762057  | 0.382956  | C         | 0.387980  | -1.973748 | 1.782950  |
| P  | 0.170838  | -1.809554 | -0.032593 | C         | 1.641417  | -1.678711 | 2.336526  |
| C  | -5.423613 | -1.935416 | 1.248134  | C         | -0.670448 | -2.297520 | 2.635913  |
| H  | -4.589577 | -1.668915 | 1.909241  | C         | 1.828692  | -1.715837 | 3.713223  |
| H  | -6.294671 | -1.333808 | 1.537058  | H         | 2.473949  | -1.404044 | 1.689539  |
| H  | -5.661949 | -2.994836 | 1.405887  | C         | -0.481053 | -2.323294 | 4.014709  |
| C  | -6.269891 | -2.058933 | -1.095573 | H         | -1.649449 | -2.539835 | 2.225992  |
| H  | -6.539353 | -3.110522 | -0.949574 | C         | 0.767021  | -2.033957 | 4.556113  |
| H  | -7.151141 | -1.472739 | -0.813498 | H         | 2.808458  | -1.489485 | 4.128357  |
| H  | -6.068735 | -1.895096 | -2.161186 | H         | -1.314647 | -2.575811 | 4.666163  |
| Cu | 0.120688  | 0.342685  | -0.920633 | H         | 0.912681  | -2.055802 | 5.633807  |
| C  | -0.957146 | 3.532137  | -0.006965 | H         | 2.488899  | -0.094201 | -1.862161 |
| C  | -0.763320 | 4.528418  | 0.950180  | O         | -1.032126 | 0.424399  | -2.626439 |
| C  | -0.856774 | 3.852794  | -1.367945 | H         | -0.098351 | 0.853728  | -3.334506 |
| C  | -0.456425 | 5.827962  | 0.550544  | C         | -1.618745 | -0.689594 | -3.224034 |
| H  | -0.836621 | 4.288129  | 2.009715  | H         | -1.697996 | -0.560667 | -4.318639 |
| C  | -0.564126 | 5.151552  | -1.762663 | H         | -1.060632 | -1.630251 | -3.044925 |
| H  | -0.999962 | 3.066112  | -2.111816 | H         | -2.642266 | -0.855201 | -2.842393 |
| C  | -0.353549 | 6.139657  | -0.801260 | C         | 0.875714  | 2.276042  | -4.947753 |
| H  | -0.297460 | 6.598810  | 1.301211  | H         | 0.159331  | 1.920487  | -5.699092 |
| H  | -0.488786 | 5.392609  | -2.820942 | H         | 0.464635  | 3.208898  | -4.535208 |
| H  | -0.108902 | 7.153989  | -1.107735 | H         | 1.797235  | 2.545558  | -5.486048 |
| C  | -1.168394 | 1.661044  | 2.212860  |           |           |           |           |
| C  | 0.070115  | 1.564910  | 2.858383  | <b>79</b> |           |           |           |
| C  | -2.338197 | 1.640946  | 2.977712  | C         | -2.315669 | -0.828386 | -0.779151 |
| C  | 0.133711  | 1.453540  | 4.242991  | C         | -1.049179 | -1.284994 | -0.029803 |
| H  | 0.995152  | 1.574934  | 2.279918  | C         | -1.395794 | -1.794834 | 1.362601  |
| C  | -2.271643 | 1.519047  | 4.362546  | H         | -0.528169 | -2.279276 | 1.822843  |
| H  | -3.308623 | 1.716859  | 2.488992  | H         | -1.727837 | -0.982373 | 2.020137  |
| C  | -1.036400 | 1.426231  | 4.996777  | H         | -2.206320 | -2.535038 | 1.308034  |

|           |           |           |           |              |           |           |           |
|-----------|-----------|-----------|-----------|--------------|-----------|-----------|-----------|
| C         | -0.027359 | -0.152996 | 0.000083  | H            | 2.412178  | 1.428344  | 1.282376  |
| H         | 0.184042  | 0.127675  | -1.043676 | C            | 3.791796  | 0.591777  | -0.029676 |
| H         | -0.492382 | 0.726512  | 0.469420  | C            | 4.727978  | 1.757306  | 0.088519  |
| C         | 1.289865  | -0.481815 | 0.700764  | H            | 4.349153  | 2.524417  | 0.772186  |
| H         | 1.093016  | -0.682481 | 1.765808  | H            | 5.715225  | 1.434873  | 0.448970  |
| H         | 1.696070  | -1.410247 | 0.281459  | H            | 4.898833  | 2.225590  | -0.891323 |
| C         | 2.259945  | 0.651202  | 0.593202  | C            | 4.275162  | -0.485671 | -0.951727 |
| H         | 1.906787  | 1.593537  | 1.025556  | H            | 3.579824  | -1.322840 | -1.051569 |
| C         | 3.470691  | 0.661590  | 0.020735  | H            | 4.457678  | -0.077140 | -1.955498 |
| C         | 4.299785  | 1.910960  | -0.008513 | H            | 5.238639  | -0.885358 | -0.605411 |
| H         | 3.798152  | 2.752128  | 0.481641  | O            | -0.448802 | -1.947700 | -0.875405 |
| H         | 5.268256  | 1.753756  | 0.487499  | C            | -3.271244 | -0.016165 | 0.007100  |
| H         | 4.531406  | 2.205484  | -1.042082 | H            | -3.451826 | -0.337083 | 1.037215  |
| C         | 4.125088  | -0.518310 | -0.630919 | C            | -4.402012 | 0.706952  | -0.652195 |
| H         | 3.510803  | -1.422276 | -0.620706 | H            | -4.131327 | 0.945277  | -1.690078 |
| H         | 4.373295  | -0.290356 | -1.677017 | H            | -1.179225 | -2.565059 | -1.000520 |
| H         | 5.078284  | -0.751730 | -0.135953 | H            | -1.918351 | 0.086539  | -1.589282 |
| O         | -0.440903 | -2.330169 | -0.787091 | C            | -4.779370 | 1.978950  | 0.100978  |
| C         | -3.116204 | 0.237250  | -0.103497 | H            | -5.627123 | 2.488457  | -0.369375 |
| H         | -3.657213 | -0.046171 | 0.804865  | H            | -5.057650 | 1.753168  | 1.137827  |
| C         | -3.208844 | 1.497321  | -0.532091 | H            | -3.935868 | 2.678272  | 0.131239  |
| H         | -2.668473 | 1.774627  | -1.442495 | H            | -5.281266 | 0.047131  | -0.702447 |
| H         | -1.042305 | -3.084149 | -0.780668 |              |           |           |           |
| H         | -2.003390 | -0.490646 | -1.778098 | <b>81-ts</b> |           |           |           |
| C         | -4.000620 | 2.571679  | 0.132816  | C            | -3.976600 | -3.703107 | 0.140407  |
| H         | -3.366153 | 3.419795  | 0.420791  | C            | -3.430493 | -2.818845 | -0.790465 |
| H         | -4.770870 | 2.976013  | -0.536691 | C            | -2.137937 | -2.359349 | -0.549352 |
| H         | -4.498045 | 2.199013  | 1.035380  | C            | -1.373395 | -2.744111 | 0.552651  |
| H         | -2.941968 | -1.724433 | -0.926676 | C            | -1.943457 | -3.652722 | 1.444623  |
|           |           |           |           | C            | -3.238726 | -4.120688 | 1.244699  |
| <b>80</b> |           |           |           | H            | -4.985164 | -4.084805 | 0.000049  |
| C         | -2.089100 | -0.251295 | -0.561545 | H            | -1.376892 | -3.976402 | 2.315688  |
| C         | -0.897190 | -0.946040 | 0.044620  | H            | -3.675660 | -4.822049 | 1.951627  |
| C         | -1.202061 | -1.588926 | 1.389272  | O            | -1.554421 | -1.467958 | -1.421872 |
| H         | -0.347059 | -2.186073 | 1.721038  | C            | -4.111092 | -2.383048 | -2.080488 |
| H         | -1.419880 | -0.837826 | 2.158391  | C            | -3.691748 | -0.945756 | -2.359537 |
| H         | -2.068410 | -2.257687 | 1.311878  | C            | -2.394120 | -0.559817 | -2.013825 |
| C         | 0.248927  | 0.064075  | 0.140258  | C            | -4.496554 | 0.001296  | -2.988401 |
| H         | 0.402063  | 0.492420  | -0.861714 | C            | -1.889118 | 0.725215  | -2.236510 |
| H         | -0.079991 | 0.892550  | 0.785893  | C            | -4.011916 | 1.274646  | -3.273205 |
| C         | 1.579546  | -0.493480 | 0.645694  | H            | -5.514727 | -0.255089 | -3.271064 |
| H         | 1.447406  | -0.871889 | 1.671305  | C            | -2.721135 | 1.631739  | -2.902703 |
| H         | 1.863172  | -1.356662 | 0.031913  | H            | -4.647788 | 1.994316  | -3.782853 |
| C         | 2.638272  | 0.562880  | 0.650407  | H            | -2.361781 | 2.637418  | -3.110787 |

|    |           |           |           |   |           |           |           |
|----|-----------|-----------|-----------|---|-----------|-----------|-----------|
| P  | 0.234763  | -1.885503 | 0.744626  | C | 0.921609  | 0.697352  | -2.898169 |
| P  | -0.232935 | 1.173082  | -1.557386 | C | 2.291119  | 0.870825  | -2.646899 |
| C  | -3.585575 | -3.271087 | -3.225572 | C | 0.518916  | 0.120819  | -4.104669 |
| H  | -2.496593 | -3.197712 | -3.322152 | C | 3.229248  | 0.512640  | -3.608355 |
| H  | -3.843503 | -4.321088 | -3.037447 | H | 2.612049  | 1.254261  | -1.673507 |
| H  | -4.036408 | -2.964643 | -4.178100 | C | 1.464452  | -0.265959 | -5.051742 |
| C  | -5.626311 | -2.535166 | -2.004960 | H | -0.541137 | -0.025716 | -4.307836 |
| H  | -6.094791 | -2.255804 | -2.954785 | C | 2.818642  | -0.060681 | -4.810802 |
| H  | -5.897968 | -3.580450 | -1.822241 | H | 4.289141  | 0.663500  | -3.413459 |
| H  | -6.061901 | -1.919934 | -1.207913 | H | 1.138162  | -0.719454 | -5.985183 |
| Cu | 0.248150  | 0.588638  | 0.761086  | H | 3.556179  | -0.353361 | -5.554662 |
| C  | 0.822367  | -2.407430 | 2.398237  | B | -1.465086 | 1.002593  | 1.747283  |
| C  | 2.079090  | -2.988754 | 2.588299  | O | -2.001740 | 2.236341  | 2.128580  |
| C  | 0.070382  | -2.032225 | 3.522645  | O | -2.432185 | 0.012169  | 1.940172  |
| C  | 2.568509  | -3.210265 | 3.874207  | C | -3.276497 | 2.010962  | 2.760575  |
| H  | 2.681143  | -3.269517 | 1.724867  | C | -3.703054 | 0.649597  | 2.150758  |
| C  | 0.554365  | -2.271055 | 4.803503  | C | -3.023814 | 1.934834  | 4.260615  |
| H  | -0.893687 | -1.538760 | 3.383149  | H | -2.512489 | 2.851565  | 4.578065  |
| C  | 1.806061  | -2.858380 | 4.983376  | H | -3.956377 | 1.846135  | 4.831619  |
| H  | 3.548266  | -3.664741 | 4.006937  | H | -2.376541 | 1.083536  | 4.506175  |
| H  | -0.043320 | -1.988234 | 5.667819  | C | -4.190521 | 3.177696  | 2.444006  |
| H  | 2.186825  | -3.036211 | 5.986700  | H | -5.208132 | 2.995495  | 2.814293  |
| C  | 1.314267  | -2.830688 | -0.405215 | H | -3.814571 | 4.085446  | 2.932035  |
| C  | 2.348269  | -2.131335 | -1.036577 | H | -4.239763 | 3.368631  | 1.366404  |
| C  | 1.135135  | -4.188715 | -0.688354 | C | -4.549806 | -0.233013 | 3.044108  |
| C  | 3.181419  | -2.778537 | -1.945452 | H | -5.508635 | 0.246110  | 3.282068  |
| H  | 2.495502  | -1.075541 | -0.802670 | H | -4.759681 | -1.176673 | 2.524016  |
| C  | 1.970592  | -4.833968 | -1.594664 | H | -4.035318 | -0.472388 | 3.980332  |
| H  | 0.334109  | -4.742366 | -0.198470 | C | -4.365727 | 0.792717  | 0.784547  |
| C  | 2.992365  | -4.128373 | -2.226955 | H | -4.416811 | -0.196478 | 0.310057  |
| H  | 3.974119  | -2.219704 | -2.441989 | H | -5.384504 | 1.193505  | 0.858429  |
| H  | 1.822196  | -5.889872 | -1.811279 | H | -3.776644 | 1.440621  | 0.120881  |
| H  | 3.639809  | -4.632977 | -2.940869 | C | 2.099785  | 2.468544  | 1.437778  |
| C  | -0.313209 | 3.006984  | -1.700343 | C | 2.896222  | 1.267694  | 1.785085  |
| C  | 0.431965  | 3.754452  | -2.614197 | C | 2.617109  | 0.701663  | 3.169801  |
| C  | -1.187542 | 3.674538  | -0.829187 | H | 3.004101  | -0.321653 | 3.240669  |
| C  | 0.303176  | 5.142244  | -2.663225 | H | 3.086010  | 1.312117  | 3.953448  |
| H  | 1.113830  | 3.252678  | -3.299068 | H | 1.538482  | 0.642536  | 3.352483  |
| C  | -1.343574 | 5.053162  | -0.909481 | C | 4.392174  | 1.425431  | 1.520777  |
| H  | -1.732501 | 3.109158  | -0.069522 | H | 4.510848  | 1.893009  | 0.530077  |
| C  | -0.593492 | 5.793316  | -1.822629 | H | 4.848922  | 2.104456  | 2.257186  |
| H  | 0.894690  | 5.712373  | -3.376345 | C | 5.116194  | 0.075472  | 1.514345  |
| H  | -2.042340 | 5.556106  | -0.242501 | H | 5.117861  | -0.345860 | 2.528811  |
| H  | -0.706589 | 6.873674  | -1.875994 | H | 4.524900  | -0.618885 | 0.897690  |

|              |           |           |           |    |           |           |           |
|--------------|-----------|-----------|-----------|----|-----------|-----------|-----------|
| C            | 6.527906  | 0.182996  | 1.022648  | H  | 8.640984  | 1.052471  | 1.052700  |
| H            | 7.296920  | 0.325624  | 1.786398  | H  | 8.957254  | 1.066233  | -0.674925 |
| C            | 6.924690  | 0.168857  | -0.256122 | O  | 2.102393  | 0.368214  | -1.121658 |
| C            | 8.365885  | 0.322918  | -0.634666 | C  | 1.134205  | 1.605406  | -3.451976 |
| H            | 9.011097  | 0.443305  | 0.242022  | H  | 1.058435  | 2.654889  | -3.156627 |
| H            | 8.719811  | -0.548948 | -1.203065 | C  | -0.007285 | 1.018329  | -3.966472 |
| H            | 8.511861  | 1.194021  | -1.289375 | H  | 2.363293  | -0.146632 | -3.437622 |
| C            | 5.986309  | 0.030118  | -1.415505 | H  | 0.029736  | -0.038104 | -4.241049 |
| H            | 4.950891  | -0.176541 | -1.119939 | C  | -4.692920 | 1.452757  | 2.457807  |
| H            | 5.985457  | 0.956924  | -2.010110 | C  | -3.780227 | 0.398347  | 2.459268  |
| H            | 6.313745  | -0.769330 | -2.096164 | C  | -2.514353 | 0.647621  | 1.931487  |
| O            | 2.294923  | 0.548275  | 0.755176  | C  | -2.138732 | 1.876118  | 1.380809  |
| C            | 1.098936  | 3.121722  | 2.187801  | C  | -3.077711 | 2.909568  | 1.410660  |
| H            | 0.793665  | 2.706795  | 3.147106  | C  | -4.342876 | 2.700163  | 1.949224  |
| C            | 0.578252  | 4.307138  | 1.775124  | H  | -5.692304 | 1.304670  | 2.859613  |
| H            | 0.869150  | 4.690233  | 0.793550  | H  | -2.817554 | 3.881458  | 0.995130  |
| H            | 2.376126  | 2.918562  | 0.479972  | H  | -5.064850 | 3.512773  | 1.967308  |
| C            | -0.422167 | 5.076995  | 2.545578  | O  | -1.573252 | -0.355870 | 1.921193  |
| H            | -1.414709 | 4.931257  | 2.089774  | C  | -4.060907 | -0.989152 | 3.021178  |
| H            | -0.490835 | 4.727426  | 3.581311  | C  | -3.305683 | -1.992294 | 2.159288  |
| H            | -0.216018 | 6.153549  | 2.536896  | C  | -2.049609 | -1.623954 | 1.677923  |
|              |           |           |           | C  | -3.762133 | -3.270269 | 1.838635  |
|              |           |           |           | C  | -1.233061 | -2.471445 | 0.923529  |
| <b>82-ts</b> |           |           |           | C  | -2.980882 | -4.138746 | 1.081266  |
| C            | 2.238842  | 0.869101  | -3.056178 | H  | -4.739668 | -3.599556 | 2.181871  |
| C            | 3.016620  | 1.159363  | -1.825132 | C  | -1.724393 | -3.745602 | 0.632457  |
| C            | 3.049856  | 2.611544  | -1.378475 | H  | -3.355403 | -5.130586 | 0.840189  |
| H            | 3.438752  | 2.681330  | -0.355553 | H  | -1.126155 | -4.424592 | 0.028473  |
| H            | 3.693727  | 3.215974  | -2.031477 | P  | -0.488881 | 1.986308  | 0.581017  |
| H            | 2.045226  | 3.049045  | -1.367023 | P  | 0.336287  | -1.782328 | 0.272139  |
| C            | 4.403606  | 0.518368  | -1.809204 | C  | -3.499396 | -1.063775 | 4.453632  |
| H            | 4.265745  | -0.534994 | -2.104055 | H  | -2.423510 | -0.854155 | 4.474287  |
| H            | 5.050227  | 0.983194  | -2.569318 | H  | -4.003460 | -0.330806 | 5.096048  |
| C            | 5.086790  | 0.573158  | -0.440645 | H  | -3.661733 | -2.065472 | 4.871391  |
| H            | 5.500081  | 1.574168  | -0.262081 | C  | -5.554747 | -1.289237 | 3.057655  |
| H            | 4.310939  | 0.419452  | 0.327882  | H  | -5.741326 | -2.283671 | 3.477352  |
| C            | 6.134996  | -0.481913 | -0.289972 | H  | -6.079366 | -0.577431 | 3.703859  |
| H            | 5.757589  | -1.506539 | -0.388937 | H  | -5.997605 | -1.243652 | 2.054385  |
| C            | 7.449244  | -0.335494 | -0.073001 | Cu | 0.041426  | 0.259719  | -0.906769 |
| C            | 8.352179  | -1.527403 | 0.038068  | C  | -0.542637 | 3.623040  | -0.239849 |
| H            | 7.805065  | -2.471056 | -0.059215 | C  | 0.236686  | 4.711509  | 0.158031  |
| H            | 9.132651  | -1.502252 | -0.735734 | C  | -1.324048 | 3.727522  | -1.399957 |
| H            | 8.879425  | -1.534781 | 1.002683  | C  | 0.239100  | 5.886115  | -0.592079 |
| C            | 8.154021  | 0.979096  | 0.070106  | H  | 0.855502  | 4.638147  | 1.051409  |
| H            | 7.495931  | 1.844483  | -0.043743 |    |           |           |           |



|   |           |           |           |   |           |           |           |
|---|-----------|-----------|-----------|---|-----------|-----------|-----------|
| C | -1.331095 | 4.906784  | -2.135452 | H | 3.134905  | -1.367447 | 0.446023  |
| H | -1.921245 | 2.871453  | -1.722425 | C | 2.005789  | -2.199870 | 4.052036  |
| C | -0.543326 | 5.986427  | -1.737462 | H | 0.031737  | -2.424779 | 3.228141  |
| H | 0.854795  | 6.725680  | -0.277097 | C | 3.345581  | -1.929852 | 3.796090  |
| H | -1.948186 | 4.981465  | -3.029177 | H | 4.803020  | -1.429676 | 2.279713  |
| H | -0.540428 | 6.903621  | -2.321929 | H | 1.679455  | -2.426560 | 5.064816  |
| C | 0.621483  | 2.243453  | 2.017594  | H | 4.069290  | -1.939041 | 4.607977  |
| C | 1.888997  | 1.657649  | 1.973441  | B | -1.599141 | -0.143190 | -2.114846 |
| C | 0.250621  | 3.004339  | 3.131618  | O | -1.887997 | -1.440728 | -2.520078 |
| C | 2.781297  | 1.843949  | 3.026766  | O | -2.757919 | 0.627675  | -2.152232 |
| H | 2.158387  | 1.051470  | 1.104450  | C | -3.250842 | -1.502951 | -2.990789 |
| C | 1.143334  | 3.188979  | 4.181395  | C | -3.892868 | -0.247940 | -2.330661 |
| H | -0.739620 | 3.458744  | 3.172319  | C | -3.202882 | -1.439016 | -4.511419 |
| C | 2.410625  | 2.609960  | 4.127486  | H | -2.578487 | -2.261955 | -4.877345 |
| H | 3.764465  | 1.377506  | 2.989231  | H | -4.200380 | -1.543260 | -4.955338 |
| H | 0.851529  | 3.783734  | 5.044217  | H | -2.762941 | -0.500251 | -4.867090 |
| H | 3.107559  | 2.753550  | 4.950287  | C | -3.860254 | -2.825615 | -2.566377 |
| C | 0.997590  | -3.107719 | -0.807566 | H | -4.919382 | -2.873657 | -2.852170 |
| C | 1.488014  | -4.320939 | -0.311342 | H | -3.338863 | -3.647621 | -3.070771 |
| C | 1.054546  | -2.857446 | -2.180627 | H | -3.780705 | -2.988566 | -1.486677 |
| C | 2.013640  | -5.272837 | -1.177966 | C | -4.934945 | 0.458515  | -3.174352 |
| H | 1.462639  | -4.515213 | 0.761125  | H | -5.783341 | -0.206667 | -3.381407 |
| C | 1.586411  | -3.808162 | -3.047385 | H | -5.316485 | 1.330110  | -2.630451 |
| H | 0.671520  | -1.906364 | -2.551339 | H | -4.528428 | 0.807775  | -4.128622 |
| C | 2.064207  | -5.015866 | -2.546848 | C | -4.457686 | -0.522767 | -0.944074 |
| H | 2.390739  | -6.214605 | -0.785316 | H | -4.707806 | 0.432930  | -0.465406 |
| H | 1.630522  | -3.604074 | -4.115141 | H | -5.365043 | -1.139095 | -0.982005 |
| H | 2.482023  | -5.758090 | -3.223507 | H | -3.718178 | -1.029557 | -0.312474 |
| C | 1.476442  | -1.902835 | 1.709728  | C | -1.107808 | 1.845427  | -4.536450 |
| C | 2.827662  | -1.626422 | 1.461166  | H | -2.100647 | 1.430971  | -4.344740 |
| C | 1.074418  | -2.192766 | 3.014002  | H | -1.080224 | 2.861746  | -4.126237 |
| C | 3.756325  | -1.646524 | 2.493268  | H | -0.981296 | 1.918994  | -5.626905 |
